# Supplementary material for: Zika Virus Infection Alters Gene Expression and Poly-Adenylation Patterns in Placental Cells
Source: Pathogens. 2022 Aug 18;11(8):936. doi: 10.3390/pathogens11080936 (PMC9414685; doi:10.3390/pathogens11080936)
Supplement: Supplementary file 1 [file pathogens-11-00936-s001.zip]

Archive with 4 entries (4 files):
- Data S1.tsv
- Data S2.tsv
- Data S3.zip
- pathogens-1734489-supplementary-tables & figures.pdf
