# Supplementary material for: Zika Virus Infection Alters Gene Expression and Poly-Adenylation Patterns in Placental Cells
Source: Pathogens. 2022 Aug 18;11(8):936. doi: 10.3390/pathogens11080936 (PMC9414685; doi:10.3390/pathogens11080936)
Supplement: Supplementary file 1 [file pathogens-11-00936-s001.zip › Data S1.tsv]

	Gene Name	Mean Counts Cond1	Mean Counts Cond2	Fold Change	pAdj	DE Result	Any Splicing APA? (DPAC)	Any Tandem APA? (DPAC)	#Exons with a PAC	Exon Names	Exon fraction Cond1	Exon fraction Cond2	Exon Fraction Change	Exon Results (NA = Not significant)	#PACs per Exon	PDU per Exon Cond1	PDU per Exon Cond2	delta-PDUI per Exon	DPAC Result	Links to USCS Gene Browser (one link per cell):
1	Unannotated	1049099.4671	874791.7885	-0.2621	0.2414	NC	No	No	0
1	Pcmt1	204.515	251.8617	0.2967	0.5246	NC	No	No	2	Pcmt1_exon_chr1:1736250	0.9656	0.7937	-0.1719	NA	3	0.4051	0.1506	-0.2545	NA	Pcmt1_exon_chr1:1736250
2	Pcmt1									Pcmt1_intron_chr1:1740726	0.0344	0.2048	0.1705	Up	1	NA	NA	NA	NA	Pcmt1_intron_chr1:1740726
1	Tab2	133.1851	197.1831	0.5667	0.2505	NC	No	Yes	2	Tab2_exon_chr1:2001065	0.9487	0.9964	0.0477	NA	5	0.8178	0.7707	-0.0471	Both	Tab2_exon_chr1:2001065
2	Tab2									Tab2_intron_chr1:2073762	0.044	0.0036	-0.0404	NA	2	NA	NA	0.0	NA	Tab2_intron_chr1:2073762
1	Ust	32.7632	101.6716	1.6268	0.4208	NC	No	No	6	Ust_exon_chr1:2334230	0.0611	0.4082	0.3471	NA	1	NA	NA	NA	NA	Ust_exon_chr1:2334230
2	Ust									Ust_exon_chr1:2452054	0.0	0.0645	0.0645	NA	1	NA	NA	NA	NA	Ust_exon_chr1:2452054
3	Ust									Ust_intron_chr1:2375314	0.1861	0.0363	-0.1498	NA	3	NA	NA	0.2793	NA	Ust_intron_chr1:2375314
4	Ust									Ust_intron_chr1:2425878	0.1474	0.1007	-0.0467	NA	4	NA	NA	0.514	NA	Ust_intron_chr1:2425878
5	Ust									Ust_intron_chr1:2510588	0.0684	0.059	-0.0095	NA	2	NA	NA	0.1667	NA	Ust_intron_chr1:2510588
6	Ust									Ust_intron_chr1:2626852	0.5369	0.3313	-0.2056	NA	11	NA	NA	0.1683	NA	Ust_intron_chr1:2626852
1	Stxbp5	54.1769	78.4606	0.5437	0.5526	NC	No	No	6	Stxbp5_exon_chr1:3862132	0.0	0.1233	0.1233	NA	1	NA	NA	NA	NA	Stxbp5_exon_chr1:3862132
2	Stxbp5									Stxbp5_intron_chr1:3886243	0.1471	0.0837	-0.0634	NA	4	NA	NA	-0.1208	NA	Stxbp5_intron_chr1:3886243
3	Stxbp5									Stxbp5_intron_chr1:3890867	0.2213	0.0	-0.2213	NA	3	NA	NA	-0.3339	NA	Stxbp5_intron_chr1:3890867
4	Stxbp5									Stxbp5_intron_chr1:3919307	0.0631	0.0127	-0.0503	NA	1	NA	NA	NA	NA	Stxbp5_intron_chr1:3919307
5	Stxbp5									Stxbp5_intron_chr1:3964132	0.093	0.101	0.008	NA	1	NA	NA	NA	NA	Stxbp5_intron_chr1:3964132
6	Stxbp5									Stxbp5_intron_chr1:4009690	0.4755	0.6793	0.2038	NA	3	0.4445	0.1896	-0.2549	NA	Stxbp5_intron_chr1:4009690
1	Utrn	243.4762	285.3124	0.2227	0.6658	NC	No	Yes	15	Utrn_exon_chr1:6453814	0.0323	0.2567	0.2244	Up	5	NA	NA	-0.2073	Shortening	Utrn_exon_chr1:6453814
2	Utrn									Utrn_exon_chr1:6734922	0.011	0.0155	0.0046	NA	1	NA	NA	NA	NA	Utrn_exon_chr1:6734922
3	Utrn									Utrn_exon_chr1:6758570	0.0775	0.0051	-0.0725	NA	1	NA	NA	NA	NA	Utrn_exon_chr1:6758570
4	Utrn									Utrn_exon_chr1:6763676	0.0268	0.0	-0.0268	NA	1	NA	NA	NA	NA	Utrn_exon_chr1:6763676
5	Utrn									Utrn_exon_chr1:6774870	0.0142	0.0025	-0.0117	NA	1	NA	NA	NA	NA	Utrn_exon_chr1:6774870
6	Utrn									Utrn_exon_chr1:6801879	0.0248	0.0159	-0.0088	NA	1	NA	NA	NA	NA	Utrn_exon_chr1:6801879
7	Utrn									Utrn_exon_chr1:6816920	0.0823	0.0048	-0.0774	NA	1	NA	NA	NA	NA	Utrn_exon_chr1:6816920
8	Utrn									Utrn_exon_chr1:6834404	0.0497	0.0665	0.0169	NA	1	NA	NA	NA	NA	Utrn_exon_chr1:6834404
9	Utrn									Utrn_intron_chr1:6546221	0.0	0.0126	0.0126	NA	1	NA	NA	NA	NA	Utrn_intron_chr1:6546221
10	Utrn									Utrn_intron_chr1:6702975	0.036	0.0031	-0.0329	NA	3	NA	NA	-0.0	NA	Utrn_intron_chr1:6702975
11	Utrn									Utrn_intron_chr1:6769295	0.018	0.0013	-0.0167	NA	1	NA	NA	NA	NA	Utrn_intron_chr1:6769295
12	Utrn									Utrn_intron_chr1:6811977	0.4114	0.4184	0.007	NA	1	NA	NA	NA	NA	Utrn_intron_chr1:6811977
13	Utrn									Utrn_intron_chr1:6818350	0.0148	0.033	0.0182	NA	1	NA	NA	NA	NA	Utrn_intron_chr1:6818350
14	Utrn									Utrn_intron_chr1:6823572	0.0654	0.0768	0.0114	NA	2	NA	NA	0.6876	NA	Utrn_intron_chr1:6823572
15	Utrn									Utrn_intron_chr1:6961853	0.1358	0.0753	-0.0605	NA	5	0.2593	0.379	0.1197	NA	Utrn_intron_chr1:6961853
1	Stx11	35.4364	46.5199	0.3841	0.8134	NC	No	No	2	Stx11_exon_chr1:7041043	0.9836	0.8679	-0.1156	NA	3	1.0	0.9092	-0.0908	NA	Stx11_exon_chr1:7041043
2	Stx11									Stx11_intron_chr1:7064801	0.0164	0.1321	0.1156	NA	4	NA	NA	0.0391	NA	Stx11_intron_chr1:7064801
1	Ltv1	87.2686	81.9384	-0.0898	1.0	NC	No	No	3	Ltv1_exon_chr1:7323438	0.8535	0.9697	0.1162	NA	5	0.8895	0.7726	-0.1168	NA	Ltv1_exon_chr1:7323438
2	Ltv1									Ltv1_exon_chr1:7323832	0.0458	0.026	-0.0198	NA	1	NA	NA	NA	NA	Ltv1_exon_chr1:7323832
3	Ltv1									Ltv1_exon_chr1:7326654	0.1007	0.0	-0.1007	NA	1	NA	NA	NA	NA	Ltv1_exon_chr1:7326654
1	Phactr2	130.4951	111.4686	-0.2297	0.8482	NC	No	No	4	Phactr2_exon_chr1:7372888	0.0412	0.0194	-0.0218	NA	1	NA	NA	NA	NA	Phactr2_exon_chr1:7372888
2	Phactr2									Phactr2_exon_chr1:7378687	0.8465	0.9542	0.1077	NA	1	NA	NA	NA	NA	Phactr2_exon_chr1:7378687
3	Phactr2									Phactr2_exon_chr1:7384264	0.0531	0.0097	-0.0434	NA	1	NA	NA	NA	NA	Phactr2_exon_chr1:7384264
4	Phactr2									Phactr2_intron_chr1:7371180	0.0524	0.0032	-0.0492	NA	1	NA	NA	NA	NA	Phactr2_intron_chr1:7371180
1	Pex3	54.9304	48.2633	-0.1885	0.8976	NC	No	Yes	4	Pex3_exon_chr1:7686025	0.4561	0.8558	0.3997	NA	4	0.7173	0.0519	-0.6653	Both	Pex3_exon_chr1:7686025
2	Pex3									Pex3_exon_chr1:7719776	0.1614	0.0701	-0.0913	NA	1	NA	NA	NA	NA	Pex3_exon_chr1:7719776
3	Pex3									Pex3_exon_chr1:7726238	0.2543	0.0667	-0.1876	NA	1	NA	NA	NA	NA	Pex3_exon_chr1:7726238
4	Pex3									Pex3_intron_chr1:7698479	0.1282	0.0074	-0.1208	NA	3	NA	NA	0.3303	NA	Pex3_intron_chr1:7698479
1	Aig1	157.6481	157.0465	-0.0031	1.0	NC	No	No	6	Aig1_exon_chr1:7817496	0.626	0.5404	-0.0856	NA	3	0.801	0.3465	-0.4545	NA	Aig1_exon_chr1:7817496
2	Aig1									Aig1_intron_chr1:7823787	0.0447	0.0533	0.0086	NA	3	NA	NA	0.5127	NA	Aig1_intron_chr1:7823787
3	Aig1									Aig1_intron_chr1:7860756	0.0155	0.0	-0.0155	NA	1	NA	NA	NA	NA	Aig1_intron_chr1:7860756
4	Aig1									Aig1_intron_chr1:7973763	0.2882	0.2757	-0.0124	NA	12	NA	NA	0.0543	NA	Aig1_intron_chr1:7973763
5	Aig1									Aig1_intron_chr1:7999623	0.0256	0.0771	0.0515	NA	1	NA	NA	NA	NA	Aig1_intron_chr1:7999623
6	Aig1									Aig1_intron_chr1:8038442	0.0	0.0534	0.0534	NA	3	NA	NA	0.0477	NA	Aig1_intron_chr1:8038442
1	Vta1	160.4409	275.4174	0.7836	0.0341	UP	No	No	3	Vta1_exon_chr1:8830907	0.9406	0.9961	0.0555	NA	1	NA	NA	NA	NA	Vta1_exon_chr1:8830907
2	Vta1									Vta1_intron_chr1:8856234	0.0437	0.0	-0.0437	NA	2	NA	NA	-0.4851	NA	Vta1_intron_chr1:8856234
3	Vta1									Vta1_intron_chr1:8878033	0.0157	0.0039	-0.0118	NA	3	NA	NA	NA	NA	Vta1_intron_chr1:8878033
1	Rn5-8s	102.6048	465.9786	2.1853	0.0	UP	No	Yes	1	Rn5-8s_exon_chr1:11906594	1.0	1.0	0.0	NA	4	0.4873	0.5	0.0127	Both	Rn5-8s_exon_chr1:11906594
1	LOC310926	456.8669	556.5777	0.2847	0.5393	NC	No	No	9	LOC310926_exon_chr1:11908188	0.0395	0.0748	0.0353	NA	3	NA	NA	0.0209	NA	LOC310926_exon_chr1:11908188
2	LOC310926									LOC310926_exon_chr1:11911545	0.0022	0.0104	0.0082	NA	1	NA	NA	NA	NA	LOC310926_exon_chr1:11911545
3	LOC310926									LOC310926_exon_chr1:11911942	0.4157	0.4615	0.0457	NA	2	0.1644	0.1793	0.0149	NA	LOC310926_exon_chr1:11911942
4	LOC310926									LOC310926_exon_chr1:11912234	0.0083	0.0108	0.0025	NA	2	NA	NA	0.5641	NA	LOC310926_exon_chr1:11912234
5	LOC310926									LOC310926_exon_chr1:11913647	0.2385	0.2682	0.0297	NA	2	0.0896	0.1046	0.015	NA	LOC310926_exon_chr1:11913647
6	LOC310926									LOC310926_intron_chr1:11911350	0.0381	0.0198	-0.0183	NA	5	NA	NA	0.0441	NA	LOC310926_intron_chr1:11911350
7	LOC310926									LOC310926_intron_chr1:11911813	0.0327	0.0056	-0.0272	NA	1	NA	NA	NA	NA	LOC310926_intron_chr1:11911813
8	LOC310926									LOC310926_intron_chr1:11912654	0.1771	0.1157	-0.0614	NA	5	0.754	0.7315	-0.0225	NA	LOC310926_intron_chr1:11912654
9	LOC310926									LOC310926_intron_chr1:11914345	0.0478	0.0332	-0.0145	NA	3	NA	NA	0.0896	NA	LOC310926_intron_chr1:11914345
1	Heca	28.0043	47.9922	0.7744	0.5811	NC	No	No	2	Heca_exon_chr1:13040506	0.753	0.5106	-0.2424	NA	3	NA	NA	-0.3782	NA	Heca_exon_chr1:13040506
2	Heca									Heca_exon_chr1:13050644	0.247	0.4894	0.2424	NA	1	NA	NA	NA	NA	Heca_exon_chr1:13050644
1	Abracl	895.3037	487.6836	-0.8777	0.0001	DOWN	No	Yes	3	Abracl_exon_chr1:13166139	0.9958	0.9689	-0.0268	NA	5	0.8973	0.6656	-0.2317	Both	Abracl_exon_chr1:13166139
2	Abracl									Abracl_intron_chr1:13171410	0.0042	0.0155	0.0113	NA	2	NA	NA	-0.2665	NA	Abracl_intron_chr1:13171410
3	Abracl									Abracl_intron_chr1:13175718	0.0	0.0155	0.0155	NA	2	NA	NA	0.8393	NA	Abracl_intron_chr1:13175718
1	Ccdc28a	41.6081	63.7056	0.6174	0.687	NC	No	No	2	Ccdc28a_exon_chr1:13384706	0.6428	0.6503	0.0075	NA	1	NA	NA	NA	NA	Ccdc28a_exon_chr1:13384706
2	Ccdc28a									Ccdc28a_exon_chr1:13393503	0.3572	0.3497	-0.0075	NA	1	NA	NA	NA	NA	Ccdc28a_exon_chr1:13393503
1	Hebp2	13.4014	12.447	-0.1112	1.0	NC	No	No	1	Hebp2_exon_chr1:13719134	1.0	1.0	0.0	NA	1	NA	NA	NA	NA	Hebp2_exon_chr1:13719134
1	Pex7	23.7803	10.0272	-1.2557	1.0	NC	No	No	1	Pex7_exon_chr1:15312236	1.0	1.0	0.0	NA	1	NA	NA	NA	NA	Pex7_exon_chr1:15312236
1	Ptprk	16.0136	8.8753	-0.8498	1.0	NC	No	No	3	Ptprk_exon_chr1:17446539	0.7813	0.9671	0.1858	NA	1	NA	NA	NA	NA	Ptprk_exon_chr1:17446539
2	Ptprk									Ptprk_intron_chr1:17463686	0.1883	0.0	-0.1883	NA	1	NA	NA	NA	NA	Ptprk_intron_chr1:17463686
3	Ptprk									Ptprk_intron_chr1:17740071	0.0304	0.0329	0.0025	NA	1	NA	NA	NA	NA	Ptprk_intron_chr1:17740071
1	Arhgap18	45.3623	29.2691	-0.6251	0.6994	NC	No	No	5	Arhgap18_exon_chr1:19227426	0.6051	0.8796	0.2744	NA	3	NA	NA	0.3013	NA	Arhgap18_exon_chr1:19227426
2	Arhgap18									Arhgap18_exon_chr1:19259131	0.2568	0.0983	-0.1585	NA	1	NA	NA	NA	NA	Arhgap18_exon_chr1:19259131
3	Arhgap18									Arhgap18_exon_chr1:19293734	0.0841	0.0123	-0.0718	NA	1	NA	NA	NA	NA	Arhgap18_exon_chr1:19293734
4	Arhgap18									Arhgap18_exon_chr1:19298553	0.054	0.0	-0.054	NA	1	NA	NA	NA	NA	Arhgap18_exon_chr1:19298553
5	Arhgap18									Arhgap18_intron_chr1:19376115	0.0	0.0099	0.0099	NA	1	NA	NA	NA	NA	Arhgap18_intron_chr1:19376115
1	Ccnb2	10.5991	97.8763	3.2109	0.0229	UP	No	No	1	Ccnb2_exon_chr1:21146846	1.0	1.0	0.0	NA	2	NA	NA	-0.0094	NA	Ccnb2_exon_chr1:21146846
1	Med23	52.2203	78.5301	0.6032	0.4017	NC	No	No	2	Med23_exon_chr1:21540463	0.972	0.971	-0.001	NA	1	NA	NA	NA	NA	Med23_exon_chr1:21540463
2	Med23									Med23_intron_chr1:21554934	0.028	0.029	0.001	NA	1	NA	NA	NA	NA	Med23_intron_chr1:21554934
1	Ccn2	2304.9172	3484.8721	0.5961	0.0673	UP	No	No	1	Ccn2_exon_chr1:21853021	1.0	1.0	0.0	NA	9	0.5872	0.6299	0.0428	NA	Ccn2_exon_chr1:21853021
1	Stx7	143.4344	139.278	-0.0372	0.9318	NC	No	Yes	3	Stx7_exon_chr1:22242949	0.9789	0.9347	-0.0442	NA	2	0.9086	0.2088	-0.6998	Shortening	Stx7_exon_chr1:22242949
2	Stx7									Stx7_exon_chr1:22253375	0.0	0.0576	0.0576	NA	1	NA	NA	NA	NA	Stx7_exon_chr1:22253375
3	Stx7									Stx7_intron_chr1:22275913	0.0211	0.0076	-0.0134	NA	1	NA	NA	NA	NA	Stx7_intron_chr1:22275913
1	LOC100910237	14.7088	27.1671	0.8809	1.0	NC	No	No	1	LOC100910237_exon_chr1:22757483	1.0	1.0	0.0	NA	1	NA	NA	NA	NA	LOC100910237_exon_chr1:22757483
1	Sgk1	54.0262	59.5535	0.1442	0.9529	NC	No	No	1	Sgk1_exon_chr1:24186701	1.0	1.0	0.0	NA	1	NA	NA	NA	NA	Sgk1_exon_chr1:24186701
1	Hddc2	130.4928	155.1276	0.2475	0.8187	NC	No	No	1	Hddc2_exon_chr1:28580286	1.0	1.0	0.0	NA	1	NA	NA	NA	NA	Hddc2_exon_chr1:28580286
1	Echdc1	97.3883	86.249	-0.1772	0.9715	NC	No	No	2	Echdc1_exon_chr1:30875649	0.985	1.0	0.015	NA	3	0.4095	0.3491	-0.0604	NA	Echdc1_exon_chr1:30875649
2	Echdc1									Echdc1_exon_chr1:30906423	0.015	0.0	-0.015	NA	1	NA	NA	NA	NA	Echdc1_exon_chr1:30906423
1	Mrpl36	196.3692	163.475	-0.257	0.5667	NC	No	No	2	Mrpl36_exon_chr1:31262129	0.4975	0.497	-0.0006	NA	2	0.6944	0.7615	0.067	NA	Mrpl36_exon_chr1:31262129
2	Mrpl36									Mrpl36_exon_chr1:32570602	0.5025	0.503	0.0006	NA	2	0.6968	0.7626	0.0658	NA	Mrpl36_exon_chr1:32570602
1	Ccdc127	29.6587	17.3616	-0.7709	1.0	NC	No	No	1	Ccdc127_exon_chr1:31539615	1.0	1.0	0.0	NA	4	NA	NA	0.164	NA	Ccdc127_exon_chr1:31539615
1	Brd9	72.6441	119.2977	0.7237	0.342	NC	No	No	3	Brd9_exon_chr1:31940222	0.4781	0.6151	0.137	Up	1	NA	NA	NA	NA	Brd9_exon_chr1:31940222
2	Brd9									Brd9_exon_chr1:31954909	0.163	0.1118	-0.0512	NA	1	NA	NA	NA	NA	Brd9_exon_chr1:31954909
3	Brd9									Brd9_exon_chr1:31967193	0.3589	0.2731	-0.0858	NA	1	NA	NA	NA	NA	Brd9_exon_chr1:31967193
1	Slc12a7	119.9201	91.5955	-0.3758	0.6175	NC	No	No	2	Slc12a7_exon_chr1:32088549	0.9714	1.0	0.0286	NA	3	1.0	0.894	-0.106	NA	Slc12a7_exon_chr1:32088549
2	Slc12a7									Slc12a7_intron_chr1:32093409	0.0286	0.0	-0.0286	NA	1	NA	NA	NA	NA	Slc12a7_intron_chr1:32093409
1	Clptm1l	576.6567	597.3275	0.05	0.9117	NC	No	No	1	Clptm1l_exon_chr1:32281788	1.0	1.0	0.0	NA	2	0.9897	0.9793	-0.0104	NA	Clptm1l_exon_chr1:32281788
1	Lpcat1	134.8014	80.9627	-0.7337	0.2961	NC	No	Yes	1	Lpcat1_exon_chr1:32381481	1.0	1.0	0.0	NA	5	0.9542	0.5349	-0.4194	Shortening	Lpcat1_exon_chr1:32381481
1	Irx2	28.9409	11.353	-1.3499	1.0	NC	No	No	1	Irx2_exon_chr1:33271308	1.0	1.0	0.0	NA	3	NA	NA	-0.5536	NA	Irx2_exon_chr1:33271308
1	Med10	87.5018	185.8543	1.0913	0.0994	UP	No	No	2	Med10_exon_chr1:36107739	0.9665	1.0	0.0335	NA	1	NA	NA	NA	NA	Med10_exon_chr1:36107739
2	Med10									Med10_exon_chr1:36109582	0.0335	0.0	-0.0335	NA	1	NA	NA	NA	NA	Med10_exon_chr1:36109582
1	Nsun2	433.5964	277.9498	-0.6423	0.1287	NC	No	No	1	Nsun2_exon_chr1:36298242	1.0	1.0	0.0	NA	2	0.9844	0.9735	-0.0109	NA	Nsun2_exon_chr1:36298242
1	Fastkd3	53.6808	17.3695	-1.6348	0.0494	DOWN	No	No	1	Fastkd3_exon_chr1:37734743	1.0	1.0	0.0	NA	1	NA	NA	NA	NA	Fastkd3_exon_chr1:37734743
1	RGD1566325	9.9279	2.2767	-2.1534	1.0	NC	No	No	1	RGD1566325_exon_chr1:37879831	1.0	1.0	0.0	NA	3	NA	NA	-0.2239	NA	RGD1566325_exon_chr1:37879831
1	Zbtb2	24.011	12.0791	-0.984	1.0	NC	No	No	1	Zbtb2_exon_chr1:40917053	1.0	1.0	0.0	NA	2	NA	NA	-0.2498	NA	Zbtb2_exon_chr1:40917053
1	Fbxo5	8.3144	20.4056	1.2767	1.0	NC	No	No	2	Fbxo5_exon_chr1:42462053	0.8186	0.9118	0.0932	NA	2	NA	NA	0.2035	NA	Fbxo5_exon_chr1:42462053
2	Fbxo5									Fbxo5_intron_chr1:42463469	0.1814	0.0882	-0.0932	NA	1	NA	NA	NA	NA	Fbxo5_intron_chr1:42463469
1	Mtrf1l	37.076	52.7269	0.4986	0.6678	NC	No	Yes	4	Mtrf1l_exon_chr1:42476039	0.8372	0.8588	0.0216	NA	4	0.4932	0.8106	0.3174	Lengthening	Mtrf1l_exon_chr1:42476039
2	Mtrf1l									Mtrf1l_exon_chr1:42476778	0.0	0.0109	0.0109	NA	1	NA	NA	NA	NA	Mtrf1l_exon_chr1:42476778
3	Mtrf1l									Mtrf1l_exon_chr1:42482838	0.1129	0.1303	0.0174	NA	1	NA	NA	NA	NA	Mtrf1l_exon_chr1:42482838
4	Mtrf1l									Mtrf1l_intron_chr1:42485744	0.0499	0.0	-0.0499	NA	1	NA	NA	NA	NA	Mtrf1l_intron_chr1:42485744
1	Rgs17	30.1012	58.4121	0.9372	0.4235	NC	No	Yes	3	Rgs17_exon_chr1:42494553	0.8454	0.9578	0.1124	NA	7	0.2185	0.138	-0.0805	Both	Rgs17_exon_chr1:42494553
2	Rgs17									Rgs17_intron_chr1:42530581	0.0193	0.0112	-0.0081	NA	1	NA	NA	NA	NA	Rgs17_intron_chr1:42530581
3	Rgs17									Rgs17_intron_chr1:42583242	0.1353	0.031	-0.1042	NA	4	NA	NA	0.3333	NA	Rgs17_intron_chr1:42583242
1	Cnksr3	80.1903	120.0032	0.5755	0.4875	NC	No	No	5	Cnksr3_exon_chr1:43792497	0.8854	0.7871	-0.0983	NA	5	0.9363	0.6721	-0.2641	NA	Cnksr3_exon_chr1:43792497
2	Cnksr3									Cnksr3_intron_chr1:43800569	0.0188	0.0	-0.0188	NA	1	NA	NA	NA	NA	Cnksr3_intron_chr1:43800569
3	Cnksr3									Cnksr3_intron_chr1:43805440	0.0376	0.0089	-0.0288	NA	1	NA	NA	NA	NA	Cnksr3_intron_chr1:43805440
4	Cnksr3									Cnksr3_intron_chr1:43811183	0.0	0.1848	0.1848	NA	1	NA	NA	NA	NA	Cnksr3_intron_chr1:43811183
5	Cnksr3									Cnksr3_intron_chr1:43883696	0.0582	0.0192	-0.039	NA	3	NA	NA	-0.3333	NA	Cnksr3_intron_chr1:43883696
1	Tfb1m	23.1224	22.3266	-0.0516	1.0	NC	No	No	1	Tfb1m_exon_chr1:44433886	1.0	1.0	0.0	NA	7	NA	NA	0.1017	NA	Tfb1m_exon_chr1:44433886
1	Tmem242	38.5882	9.4492	-2.0598	0.5747	NC	No	No	2	Tmem242_exon_chr1:46302922	0.1211	0.0387	-0.0824	NA	1	NA	NA	NA	NA	Tmem242_exon_chr1:46302922
2	Tmem242									Tmem242_intron_chr1:46302969	0.8789	0.9613	0.0824	NA	1	NA	NA	NA	NA	Tmem242_intron_chr1:46302969
1	Dynlt1	327.4569	342.8097	0.0689	0.8767	NC	No	No	1	Dynlt1_exon_chr1:47207306	1.0	1.0	0.0	NA	2	0.8399	0.8718	0.0319	NA	Dynlt1_exon_chr1:47207306
1	Ezr	297.525	207.1315	-0.5252	0.3266	NC	No	No	2	Ezr_exon_chr1:47288740	0.6224	0.6579	0.0355	NA	2	1.0	0.9829	-0.0171	NA	Ezr_exon_chr1:47288740
2	Ezr									Ezr_exon_chr1:47291781	0.3725	0.3404	-0.0322	NA	1	NA	NA	NA	NA	Ezr_exon_chr1:47291781
1	Sod2	160.8724	446.8157	1.4708	0.0021	UP	No	Yes	2	Sod2_exon_chr1:47916215	0.9432	0.9992	0.056	NA	3	0.2686	0.0205	-0.2481	Shortening	Sod2_exon_chr1:47916215
2	Sod2									Sod2_intron_chr1:47916766	0.0568	0.0008	-0.056	NA	1	NA	NA	NA	NA	Sod2_intron_chr1:47916766
1	Tcp1	366.9625	465.9274	0.3446	0.4017	NC	Yes	No	3	Tcp1_exon_chr1:48025963	0.7179	0.9309	0.2129	Up	1	NA	NA	NA	NA	Tcp1_exon_chr1:48025963
2	Tcp1									Tcp1_exon_chr1:48029443	0.2563	0.0505	-0.2058	NA	1	NA	NA	NA	NA	Tcp1_exon_chr1:48029443
3	Tcp1									Tcp1_intron_chr1:48030672	0.0258	0.0186	-0.0071	NA	1	NA	NA	NA	NA	Tcp1_intron_chr1:48030672
1	Agpat4	188.6824	109.0535	-0.7958	0.129	NC	No	No	2	Agpat4_exon_chr1:48720235	0.9892	0.994	0.0048	NA	5	0.9846	0.9182	-0.0664	NA	Agpat4_exon_chr1:48720235
2	Agpat4									Agpat4_intron_chr1:48825251	0.0108	0.0033	-0.0075	NA	2	NA	NA	NA	NA	Agpat4_intron_chr1:48825251
1	Prkn	58.151	67.2278	0.2012	0.9318	NC	No	No	7	Prkn_intron_chr1:49067687	0.0	0.0386	0.0386	NA	1	NA	NA	NA	NA	Prkn_intron_chr1:49067687
2	Prkn									Prkn_intron_chr1:49290110	0.0251	0.237	0.2119	NA	1	NA	NA	NA	NA	Prkn_intron_chr1:49290110
3	Prkn									Prkn_intron_chr1:49491363	0.1349	0.0	-0.1349	NA	2	NA	NA	-0.2716	NA	Prkn_intron_chr1:49491363
4	Prkn									Prkn_intron_chr1:49618126	0.2899	0.3598	0.0699	NA	5	NA	NA	0.3322	NA	Prkn_intron_chr1:49618126
5	Prkn									Prkn_intron_chr1:49681751	0.015	0.1613	0.1463	NA	2	NA	NA	0.1953	NA	Prkn_intron_chr1:49681751
6	Prkn									Prkn_intron_chr1:49844379	0.0167	0.0316	0.0149	NA	4	NA	NA	NA	NA	Prkn_intron_chr1:49844379
7	Prkn									Prkn_intron_chr1:50069921	0.5184	0.1717	-0.3467	NA	5	NA	NA	-0.1243	NA	Prkn_intron_chr1:50069921
1	Cahm	4.5368	0.0	-4.824	1.0	NC	No	No	1	Cahm_exon_chr1:50827395	1.0	1.0	0.0	NA	3	NA	NA	-0.3351	NA	Cahm_exon_chr1:50827395
1	Sft2d1	85.5794	136.3261	0.6856	0.186	NC	No	No	2	Sft2d1_exon_chr1:52999014	0.6143	0.7242	0.1099	NA	1	NA	NA	NA	NA	Sft2d1_exon_chr1:52999014
2	Sft2d1									Sft2d1_intron_chr1:53014316	0.3857	0.2758	-0.1099	NA	1	NA	NA	NA	NA	Sft2d1_intron_chr1:53014316
1	Mpc1	268.2022	339.7876	0.339	0.4609	NC	No	Yes	1	Mpc1_exon_chr1:53027128	1.0	1.0	0.0	NA	2	0.9791	0.8532	-0.1259	Shortening	Mpc1_exon_chr1:53027128
1	Cep43	36.4804	33.4706	-0.1217	1.0	NC	No	No	6	Cep43_exon_chr1:53124304	0.0	0.042	0.042	NA	1	NA	NA	NA	NA	Cep43_exon_chr1:53124304
2	Cep43									Cep43_exon_chr1:53132791	0.0638	0.0	-0.0638	NA	1	NA	NA	NA	NA	Cep43_exon_chr1:53132791
3	Cep43									Cep43_exon_chr1:53149883	0.0638	0.0756	0.0117	NA	1	NA	NA	NA	NA	Cep43_exon_chr1:53149883
4	Cep43									Cep43_exon_chr1:53152459	0.7152	0.7301	0.0149	NA	1	NA	NA	NA	NA	Cep43_exon_chr1:53152459
5	Cep43									Cep43_intron_chr1:53136481	0.0638	0.1523	0.0885	NA	1	NA	NA	NA	NA	Cep43_intron_chr1:53136481
6	Cep43									Cep43_intron_chr1:53145849	0.0933	0.0	-0.0933	NA	1	NA	NA	NA	NA	Cep43_intron_chr1:53145849
1	Afdn	63.2012	31.1095	-1.0268	0.3448	NC	No	Yes	4	Afdn_exon_chr1:53715792	0.3791	0.6009	0.2218	NA	3	0.9739	0.6105	-0.3634	Shortening	Afdn_exon_chr1:53715792
2	Afdn									Afdn_exon_chr1:53723259	0.1153	0.0461	-0.0693	NA	1	NA	NA	NA	NA	Afdn_exon_chr1:53723259
3	Afdn									Afdn_exon_chr1:53782970	0.3488	0.2609	-0.0879	NA	1	NA	NA	NA	NA	Afdn_exon_chr1:53782970
4	Afdn									Afdn_intron_chr1:53841049	0.1568	0.0921	-0.0647	NA	1	NA	NA	NA	NA	Afdn_intron_chr1:53841049
1	Thbs2	15.6751	6.7638	-1.2359	1.0	NC	No	No	1	Thbs2_exon_chr1:56655919	1.0	1.0	0.0	NA	4	NA	NA	-0.8638	NA	Thbs2_exon_chr1:56655919
1	Phf10	1353.7366	2107.1672	0.6382	0.0491	UP	No	No	4	Phf10_exon_chr1:56951694	0.7594	0.9187	0.1593	Up	1	NA	NA	NA	NA	Phf10_exon_chr1:56951694
2	Phf10									Phf10_exon_chr1:56957188	0.0985	0.0149	-0.0836	NA	1	NA	NA	NA	NA	Phf10_exon_chr1:56957188
3	Phf10									Phf10_exon_chr1:56961659	0.0629	0.0503	-0.0126	NA	1	NA	NA	NA	NA	Phf10_exon_chr1:56961659
4	Phf10									Phf10_intron_chr1:56957032	0.0763	0.0147	-0.0615	NA	3	1.0	0.9574	-0.0426	NA	Phf10_intron_chr1:56957032
1	Tcte3	7.0674	1.1384	-2.7808	1.0	NC	No	No	1	Tcte3_intron_chr1:56982449	1.0	1.0	0.0	NA	7	NA	NA	-0.2787	NA	Tcte3_intron_chr1:56982449
1	Psmb1	2665.801	2372.7784	-0.1686	0.5688	NC	No	No	1	Psmb1_exon_chr1:57471122	1.0	1.0	0.0	NA	1	NA	NA	NA	NA	Psmb1_exon_chr1:57471122
1	Pdcd2	140.3558	139.1289	-0.0177	1.0	NC	No	No	2	Pdcd2_exon_chr1:57513178	0.9657	0.9974	0.0318	NA	2	0.1887	0.2597	0.071	NA	Pdcd2_exon_chr1:57513178
2	Pdcd2									Pdcd2_intron_chr1:57514193	0.0343	0.0026	-0.0318	NA	1	NA	NA	NA	NA	Pdcd2_intron_chr1:57514193
1	Lnpep	141.1343	151.0906	0.0998	0.8568	NC	No	No	3	Lnpep_exon_chr1:59297624	0.9282	0.975	0.0468	NA	8	0.8752	0.4871	-0.3881	NA	Lnpep_exon_chr1:59297624
2	Lnpep									Lnpep_exon_chr1:59347387	0.0285	0.0019	-0.0266	NA	1	NA	NA	NA	NA	Lnpep_exon_chr1:59347387
3	Lnpep									Lnpep_intron_chr1:59384254	0.0413	0.0231	-0.0181	NA	1	NA	NA	NA	NA	Lnpep_intron_chr1:59384254
1	Zfp40	23.5732	21.0731	-0.175	1.0	NC	No	No	2	Zfp40_exon_chr1:62558026	0.8294	0.4395	-0.3899	NA	3	NA	NA	-0.5314	NA	Zfp40_exon_chr1:62558026
2	Zfp40									Zfp40_intron_chr1:62562015	0.1706	0.5605	0.3899	NA	1	NA	NA	NA	NA	Zfp40_intron_chr1:62562015
1	Rps9l1	14613.8212	12084.6075	-0.2743	0.4088	NC	No	No	2	Rps9l1_exon_chr1:64018575	0.501	0.5016	0.0005	NA	1	NA	NA	NA	NA	Rps9l1_exon_chr1:64018575
2	Rps9l1									Rps9l1_exon_chr1:64086875	0.499	0.4984	-0.0005	NA	1	NA	NA	NA	NA	Rps9l1_exon_chr1:64086875
1	Cnot3	136.8117	129.664	-0.0779	1.0	NC	No	No	3	Cnot3_exon_chr1:64131204	0.7457	0.9021	0.1564	NA	1	NA	NA	NA	NA	Cnot3_exon_chr1:64131204
2	Cnot3									Cnot3_exon_chr1:64141021	0.0392	0.0137	-0.0255	NA	1	NA	NA	NA	NA	Cnot3_exon_chr1:64141021
3	Cnot3									Cnot3_exon_chr1:64147066	0.2151	0.0842	-0.1308	NA	1	NA	NA	NA	NA	Cnot3_exon_chr1:64147066
1	Prpf31	31.9068	30.0438	-0.0987	1.0	NC	No	No	3	Prpf31_exon_chr1:64151732	0.469	0.0786	-0.3904	NA	1	NA	NA	NA	NA	Prpf31_exon_chr1:64151732
2	Prpf31									Prpf31_exon_chr1:64161898	0.531	0.778	0.247	NA	2	NA	NA	-0.0429	NA	Prpf31_exon_chr1:64161898
3	Prpf31									Prpf31_intron_chr1:64159663	0.0	0.1434	0.1434	NA	1	NA	NA	NA	NA	Prpf31_intron_chr1:64159663
1	Cacng7	2.3666	0.0	-3.886	1.0	NC	No	No	1	Cacng7_intron_chr1:64399559	1.0	1.0	0.0	NA	2	NA	NA	NA	NA	Cacng7_intron_chr1:64399559
1	Prkcg	20.0266	39.1048	0.9684	1.0	NC	No	No	2	Prkcg_exon_chr1:64408090	0.6558	0.7822	0.1263	NA	1	NA	NA	NA	NA	Prkcg_exon_chr1:64408090
2	Prkcg									Prkcg_intron_chr1:64425004	0.3442	0.2178	-0.1263	NA	2	NA	NA	0.3376	NA	Prkcg_intron_chr1:64425004
1	Myadm	611.5606	608.5178	-0.004	0.9166	NC	No	No	1	Myadm_exon_chr1:64441136	1.0	1.0	0.0	NA	8	0.9984	0.9175	-0.0809	NA	Myadm_exon_chr1:64441136
1	Trim28	315.6673	414.9791	0.396	0.3571	NC	No	No	1	Trim28_exon_chr1:65544724	1.0	1.0	0.0	NA	1	NA	NA	NA	NA	Trim28_exon_chr1:65544724
1	Rps5	1944.6411	2409.0036	0.3105	0.257	NC	No	No	1	Rps5_exon_chr1:65660590	1.0	1.0	0.0	NA	1	NA	NA	NA	NA	Rps5_exon_chr1:65660590
1	Zfp110	124.5708	107.8893	-0.2089	0.9289	NC	No	No	3	Zfp110_exon_chr1:65743605	1.0	0.9125	-0.0875	NA	7	0.953	0.9668	0.0138	NA	Zfp110_exon_chr1:65743605
2	Zfp110									Zfp110_exon_chr1:65745230	0.0	0.0231	0.0231	NA	1	NA	NA	NA	NA	Zfp110_exon_chr1:65745230
3	Zfp110									Zfp110_intron_chr1:65754751	0.0	0.0644	0.0644	NA	1	NA	NA	NA	NA	Zfp110_intron_chr1:65754751
1	Aurkc	29.1046	13.6166	-1.0965	1.0	NC	No	No	2	Aurkc_exon_chr1:69958747	0.9401	1.0	0.0599	NA	1	NA	NA	NA	NA	Aurkc_exon_chr1:69958747
2	Aurkc									Aurkc_intron_chr1:69963152	0.0599	0.0	-0.0599	NA	1	NA	NA	NA	NA	Aurkc_intron_chr1:69963152
1	Zfp444	103.6317	234.8272	1.1825	0.0036	UP	No	No	2	Zfp444_exon_chr1:71383510	0.9432	0.9027	-0.0405	NA	1	NA	NA	NA	NA	Zfp444_exon_chr1:71383510
2	Zfp444									Zfp444_intron_chr1:71389336	0.0568	0.0973	0.0405	NA	2	NA	NA	-0.2883	NA	Zfp444_intron_chr1:71389336
1	Nlrp5	6.0578	0.7589	-3.0475	1.0	NC	No	No	1	Nlrp5_exon_chr1:71453930	1.0	1.0	0.0	NA	1	NA	NA	NA	NA	Nlrp5_exon_chr1:71453930
1	Zfp580	94.0598	72.7686	-0.3674	0.8314	NC	No	No	2	Zfp580_exon_chr1:72339407	0.8179	0.848	0.0301	NA	1	NA	NA	NA	NA	Zfp580_exon_chr1:72339407
2	Zfp580									Zfp580_intron_chr1:72340474	0.1821	0.152	-0.0301	NA	2	NA	NA	0.2216	NA	Zfp580_intron_chr1:72340474
1	Zfp524	32.867	35.2045	0.1207	0.9613	NC	No	No	1	Zfp524_exon_chr1:72377434	1.0	1.0	0.0	NA	1	NA	NA	NA	NA	Zfp524_exon_chr1:72377434
1	Ssc5d	610.8594	304.5025	-1.0057	0.2314	NC	No	No	2	Ssc5d_exon_chr1:72445218	0.8999	0.9086	0.0087	NA	4	0.8236	0.8031	-0.0206	NA	Ssc5d_exon_chr1:72445218
2	Ssc5d									Ssc5d_intron_chr1:72455277	0.0967	0.0914	-0.0054	NA	1	NA	NA	NA	NA	Ssc5d_intron_chr1:72455277
1	Nat14	110.0003	27.3017	-2.0388	0.0065	DOWN	No	No	2	Nat14_exon_chr1:72463485	0.9735	1.0	0.0265	NA	1	NA	NA	NA	NA	Nat14_exon_chr1:72463485
2	Nat14									Nat14_intron_chr1:72464054	0.0265	0.0	-0.0265	NA	1	NA	NA	NA	NA	Nat14_intron_chr1:72464054
1	Rpl28	8894.3858	6631.2615	-0.424	0.2117	NC	No	No	2	Rpl28_exon_chr1:72620478	0.9894	0.9937	0.0043	NA	1	NA	NA	NA	NA	Rpl28_exon_chr1:72620478
2	Rpl28									Rpl28_exon_chr1:72620805	0.0106	0.0063	-0.0043	NA	2	1.0	0.9574	-0.0426	NA	Rpl28_exon_chr1:72620805
1	Kmt5c	93.5765	128.4346	0.4634	0.6247	NC	No	No	1	Kmt5c_exon_chr1:72667829	1.0	1.0	0.0	NA	1	NA	NA	NA	NA	Kmt5c_exon_chr1:72667829
1	Brsk1	24.5397	20.592	-0.262	1.0	NC	No	No	4	Brsk1_exon_chr1:72725268	0.0952	0.0354	-0.0598	NA	1	NA	NA	NA	NA	Brsk1_exon_chr1:72725268
2	Brsk1									Brsk1_intron_chr1:72706780	0.1033	0.5188	0.4155	NA	1	NA	NA	NA	NA	Brsk1_intron_chr1:72706780
3	Brsk1									Brsk1_intron_chr1:72710720	0.1784	0.0	-0.1784	NA	1	NA	NA	NA	NA	Brsk1_intron_chr1:72710720
4	Brsk1									Brsk1_intron_chr1:72725182	0.6231	0.4458	-0.1772	NA	1	NA	NA	NA	NA	Brsk1_intron_chr1:72725182
1	Fcar	2.9814	0.0	-4.1931	1.0	NC	No	No	1	Fcar_intron_chr1:73251811	1.0	1.0	0.0	NA	1	NA	NA	NA	NA	Fcar_intron_chr1:73251811
1	Leng8	112.5005	173.3589	0.6217	0.5122	NC	No	No	1	Leng8_exon_chr1:73725548	1.0	1.0	0.0	NA	1	NA	NA	NA	NA	Leng8_exon_chr1:73725548
1	Sult2a2	66.7824	155.5691	1.2227	0.5607	NC	No	No	2	Sult2a2_exon_chr1:76252546	0.5	0.5018	0.0018	NA	1	NA	NA	NA	NA	Sult2a2_exon_chr1:76252546
2	Sult2a2									Sult2a2_intron_chr1:76475185	0.5	0.4982	-0.0018	NA	1	NA	NA	NA	NA	Sult2a2_intron_chr1:76475185
1	Selenow	653.9678	1453.3044	1.1515	0.0	UP	No	No	2	Selenow_exon_chr1:77531024	0.5	0.4974	-0.0026	NA	1	NA	NA	NA	NA	Selenow_exon_chr1:77531024
2	Selenow									Selenow_exon_chr1:77803806	0.5	0.5026	0.0026	NA	1	NA	NA	NA	NA	Selenow_exon_chr1:77803806
1	Rpl9	1436.5016	1347.002	-0.0936	0.8161	NC	No	No	1	Rpl9_exon_chr1:77830399	1.0	1.0	0.0	NA	2	0.9797	0.9919	0.0122	NA	Rpl9_exon_chr1:77830399
1	Nop53	322.4826	292.1519	-0.1413	0.7604	NC	No	No	2	Nop53_exon_chr1:77836260	0.9818	1.0	0.0182	NA	1	NA	NA	NA	NA	Nop53_exon_chr1:77836260
2	Nop53									Nop53_exon_chr1:77843272	0.0182	0.0	-0.0182	NA	1	NA	NA	NA	NA	Nop53_exon_chr1:77843272
1	Ehd2	1726.857	1964.8359	0.1855	0.6297	NC	No	No	1	Ehd2_exon_chr1:77848463	1.0	1.0	0.0	NA	1	NA	NA	NA	NA	Ehd2_exon_chr1:77848463
1	Bicra	74.9024	95.9723	0.3583	0.7956	NC	No	No	1	Bicra_exon_chr1:77870916	1.0	1.0	0.0	NA	2	0.9873	0.8714	-0.1158	NA	Bicra_exon_chr1:77870916
1	Inafm1	29.4174	34.0018	0.218	0.9322	NC	No	No	1	Inafm1_exon_chr1:78212350	1.0	1.0	0.0	NA	3	0.0664	0.0972	0.0308	NA	Inafm1_exon_chr1:78212350
1	Sae1	472.5613	536.1905	0.1849	0.6894	NC	No	No	2	Sae1_exon_chr1:78278414	0.9989	0.975	-0.0239	NA	1	NA	NA	NA	NA	Sae1_exon_chr1:78278414
2	Sae1									Sae1_intron_chr1:78307566	0.0011	0.0245	0.0235	NA	3	NA	NA	0.3641	NA	Sae1_intron_chr1:78307566
1	Arhgap35	521.6672	389.3665	-0.4216	0.3528	NC	No	Yes	4	Arhgap35_exon_chr1:78459940	0.8982	0.8747	-0.0235	NA	7	0.7976	0.7913	-0.0063	Both	Arhgap35_exon_chr1:78459940
2	Arhgap35									Arhgap35_exon_chr1:78522187	0.0193	0.0009	-0.0184	NA	3	NA	NA	-0.6428	NA	Arhgap35_exon_chr1:78522187
3	Arhgap35									Arhgap35_intron_chr1:78505824	0.0174	0.0028	-0.0147	NA	3	NA	NA	-0.0202	NA	Arhgap35_intron_chr1:78505824
4	Arhgap35									Arhgap35_intron_chr1:78572872	0.0651	0.1216	0.0565	NA	5	0.9439	0.9058	-0.0382	NA	Arhgap35_intron_chr1:78572872
1	Fkrp	17.2522	47.5043	1.4453	0.0879	UP	No	No	1	Fkrp_exon_chr1:78736289	1.0	1.0	0.0	NA	3	1.0	0.8768	-0.1232	NA	Fkrp_exon_chr1:78736289
1	Calm3	185.9465	424.3842	1.1948	0.0011	UP	No	No	2	Calm3_exon_chr1:78844687	0.9827	1.0	0.0173	NA	1	NA	NA	NA	NA	Calm3_exon_chr1:78844687
2	Calm3									Calm3_intron_chr1:78851615	0.0173	0.0	-0.0173	NA	1	NA	NA	NA	NA	Calm3_intron_chr1:78851615
1	Ppp5c	248.024	204.5641	-0.2741	0.4657	NC	No	No	1	Ppp5c_exon_chr1:78944585	1.0	1.0	0.0	NA	1	NA	NA	NA	NA	Ppp5c_exon_chr1:78944585
1	Ccdc61	15.4078	26.6092	0.7865	1.0	NC	No	No	1	Ccdc61_exon_chr1:79796858	1.0	1.0	0.0	NA	1	NA	NA	NA	NA	Ccdc61_exon_chr1:79796858
1	Qpctl	32.4959	81.5676	1.3133	0.0735	UP	No	Yes	1	Qpctl_exon_chr1:80048604	1.0	1.0	0.0	NA	6	0.5947	0.4986	-0.0961	Both	Qpctl_exon_chr1:80048604
1	Vasp	1502.1784	905.3315	-0.7316	0.0141	DOWN	No	No	1	Vasp_exon_chr1:80171441	1.0	1.0	0.0	NA	2	0.9909	0.9877	-0.0032	NA	Vasp_exon_chr1:80171441
1	Ppm1n	59.6979	30.6088	-0.9613	0.5743	NC	No	No	1	Ppm1n_exon_chr1:80190684	1.0	1.0	0.0	NA	1	NA	NA	NA	NA	Ppm1n_exon_chr1:80190684
1	Fosb	18.2014	8.4354	-1.1082	1.0	NC	No	No	1	Fosb_exon_chr1:80217062	1.0	1.0	0.0	NA	1	NA	NA	NA	NA	Fosb_exon_chr1:80217062
1	Cd3eap	560.9843	472.0637	-0.2508	0.6378	NC	No	Yes	1	Cd3eap_exon_chr1:80269553	1.0	1.0	0.0	NA	8	0.696	0.6055	-0.0905	Both	Cd3eap_exon_chr1:80269553
1	Klc3	18.3978	5.2519	-1.8063	1.0	NC	No	No	1	Klc3_exon_chr1:80306372	1.0	1.0	0.0	NA	1	NA	NA	NA	NA	Klc3_exon_chr1:80306372
1	Mark4	188.0613	104.5488	-0.8484	0.1656	NC	No	No	3	Mark4_exon_chr1:80336787	0.9104	0.9438	0.0334	NA	2	0.9835	0.9604	-0.0231	NA	Mark4_exon_chr1:80336787
2	Mark4									Mark4_exon_chr1:80346374	0.0698	0.0494	-0.0204	NA	1	NA	NA	NA	NA	Mark4_exon_chr1:80346374
3	Mark4									Mark4_intron_chr1:80338357	0.0198	0.0068	-0.0129	NA	1	NA	NA	NA	NA	Mark4_intron_chr1:80338357
1	Ppp1r37	135.1586	72.1002	-0.9027	0.0879	DOWN	No	No	1	Ppp1r37_exon_chr1:80440144	1.0	1.0	0.0	NA	2	0.9849	1.0	0.0151	NA	Ppp1r37_exon_chr1:80440144
1	Gemin7	85.7561	116.8678	0.4624	0.4571	NC	No	No	1	Gemin7_exon_chr1:80474721	1.0	1.0	0.0	NA	2	0.2023	0.2545	0.0522	NA	Gemin7_exon_chr1:80474721
1	Clasrp	124.4049	166.2546	0.4047	0.3816	NC	No	No	1	Clasrp_exon_chr1:80491635	1.0	1.0	0.0	NA	1	NA	NA	NA	NA	Clasrp_exon_chr1:80491635
1	Clptm1	324.6837	430.8203	0.4097	0.392	NC	No	No	2	Clptm1_exon_chr1:80549768	0.9723	0.9911	0.0188	NA	1	NA	NA	NA	NA	Clptm1_exon_chr1:80549768
2	Clptm1									Clptm1_exon_chr1:80554954	0.0277	0.0041	-0.0236	NA	1	NA	NA	NA	NA	Clptm1_exon_chr1:80554954
1	Apoe	2.5132	8.5077	1.7983	1.0	NC	No	No	1	Apoe_exon_chr1:80613730	1.0	1.0	0.0	NA	1	NA	NA	NA	NA	Apoe_exon_chr1:80613730
1	Nectin2	451.691	390.8253	-0.208	0.587	NC	No	No	2	Nectin2_exon_chr1:80632563	0.5615	0.1393	-0.4222	Down	1	NA	NA	NA	NA	Nectin2_exon_chr1:80632563
2	Nectin2									Nectin2_intron_chr1:80646507	0.4282	0.8607	0.4325	Up	1	NA	NA	NA	NA	Nectin2_intron_chr1:80646507
1	Bcam	2.5262	11.3339	2.14	1.0	NC	No	No	2	Bcam_exon_chr1:80674943	0.4269	1.0	0.5731	NA	1	NA	NA	NA	NA	Bcam_exon_chr1:80674943
2	Bcam									Bcam_intron_chr1:80676499	0.5731	0.0	-0.5731	NA	1	NA	NA	NA	NA	Bcam_intron_chr1:80676499
1	Cblc	4.5238	0.7589	-2.6006	1.0	NC	No	No	1	Cblc_exon_chr1:80699398	1.0	1.0	0.0	NA	1	NA	NA	NA	NA	Cblc_exon_chr1:80699398
1	Bcl3	14.536	3.9796	-1.9093	1.0	NC	No	No	1	Bcl3_exon_chr1:80731345	1.0	1.0	0.0	NA	1	NA	NA	NA	NA	Bcl3_exon_chr1:80731345
1	Pvr	179.5878	106.7577	-0.7435	0.3328	NC	No	No	1	Pvr_exon_chr1:80820975	1.0	1.0	0.0	NA	4	0.8356	0.8489	0.0133	NA	Pvr_exon_chr1:80820975
1	Zfp111	16.0009	52.5744	1.6948	0.079	UP	No	No	1	Zfp111_exon_chr1:81038064	1.0	1.0	0.0	NA	4	NA	NA	0.0123	NA	Zfp111_exon_chr1:81038064
1	Zfp61	43.3472	121.9031	1.4887	0.0986	UP	No	No	1	Zfp61_exon_chr1:81124248	1.0	1.0	0.0	NA	1	NA	NA	NA	NA	Zfp61_exon_chr1:81124248
1	Zfp94	10.9506	2.2767	-2.3067	1.0	NC	No	No	1	Zfp94_intron_chr1:81143897	1.0	1.0	0.0	NA	1	NA	NA	NA	NA	Zfp94_intron_chr1:81143897
1	Irgc	16.398	3.1235	-2.4793	0.9841	NC	No	No	1	Irgc_exon_chr1:81293294	1.0	1.0	0.0	NA	1	NA	NA	NA	NA	Irgc_exon_chr1:81293294
1	Pinlyp	895.6929	368.1965	-1.2835	0.0036	DOWN	No	No	1	Pinlyp_exon_chr1:81406869	1.0	1.0	0.0	NA	1	NA	NA	NA	NA	Pinlyp_exon_chr1:81406869
1	Rabac1	325.4703	232.8113	-0.4871	0.3511	NC	No	No	1	Rabac1_exon_chr1:81843944	1.0	1.0	0.0	NA	1	NA	NA	NA	NA	Rabac1_exon_chr1:81843944
1	Grik5	244.9264	206.485	-0.2524	0.6429	NC	No	No	3	Grik5_exon_chr1:81886459	1.0	0.9054	-0.0946	NA	1	NA	NA	NA	NA	Grik5_exon_chr1:81886459
2	Grik5									Grik5_intron_chr1:81889910	0.0	0.0183	0.0183	NA	1	NA	NA	NA	NA	Grik5_intron_chr1:81889910
3	Grik5									Grik5_intron_chr1:81939567	0.0	0.0658	0.0658	NA	1	NA	NA	NA	NA	Grik5_intron_chr1:81939567
1	Gsk3a	360.1198	302.3441	-0.2526	0.5545	NC	No	No	1	Gsk3a_exon_chr1:82097748	1.0	1.0	0.0	NA	1	NA	NA	NA	NA	Gsk3a_exon_chr1:82097748
1	Erf	776.5329	278.0864	-1.4862	0.0011	DOWN	No	No	1	Erf_exon_chr1:82115625	1.0	1.0	0.0	NA	3	0.9915	0.9691	-0.0224	NA	Erf_exon_chr1:82115625
1	Pafah1b3	56.5933	129.9121	1.2018	0.0762	UP	No	No	1	Pafah1b3_exon_chr1:82164067	1.0	1.0	0.0	NA	1	NA	NA	NA	NA	Pafah1b3_exon_chr1:82164067
1	Bckdha	188.1758	146.2845	-0.364	0.8403	NC	No	No	1	Bckdha_exon_chr1:82423777	1.0	1.0	0.0	NA	1	NA	NA	NA	NA	Bckdha_exon_chr1:82423777
1	Ccdc97	116.4763	49.1767	-1.2551	0.0224	DOWN	No	Yes	1	Ccdc97_exon_chr1:82505465	1.0	1.0	0.0	NA	5	0.7387	0.3949	-0.3438	Shortening	Ccdc97_exon_chr1:82505465
1	Hnrnpul1	306.5655	372.988	0.2844	0.466	NC	No	No	1	Hnrnpul1_exon_chr1:82513938	1.0	1.0	0.0	NA	7	0.5906	0.6094	0.0188	NA	Hnrnpul1_exon_chr1:82513938
1	Axl	156.1761	218.9326	0.4864	0.4756	NC	No	No	3	Axl_exon_chr1:82551243	0.0	0.1013	0.1013	NA	1	NA	NA	NA	NA	Axl_exon_chr1:82551243
2	Axl									Axl_intron_chr1:82563470	0.8909	0.5827	-0.3082	NA	1	NA	NA	NA	NA	Axl_intron_chr1:82563470
3	Axl									Axl_intron_chr1:82566746	0.1091	0.316	0.2069	Up	2	NA	NA	0.0512	NA	Axl_intron_chr1:82566746
1	Egln2	297.8332	180.3655	-0.7307	0.0425	DOWN	No	No	1	Egln2_exon_chr1:83969981	1.0	1.0	0.0	NA	1	NA	NA	NA	NA	Egln2_exon_chr1:83969981
1	Rab4b	116.9449	194.5823	0.7304	0.2532	NC	No	No	2	Rab4b_exon_chr1:83979684	0.7841	0.6056	-0.1785	NA	1	NA	NA	NA	NA	Rab4b_exon_chr1:83979684
2	Rab4b									Rab4b_intron_chr1:83983133	0.2159	0.3944	0.1785	NA	3	0.7824	0.9581	0.1757	NA	Rab4b_intron_chr1:83983133
1	Snrpa	115.3143	332.6026	1.5258	0.0007	UP	No	No	1	Snrpa_exon_chr1:84000044	1.0	1.0	0.0	NA	1	NA	NA	NA	NA	Snrpa_exon_chr1:84000044
1	Itpkc	93.937	39.3384	-1.2594	0.0215	DOWN	No	No	2	Itpkc_exon_chr1:84020208	1.0	0.8603	-0.1397	Down	1	NA	NA	NA	NA	Itpkc_exon_chr1:84020208
2	Itpkc									Itpkc_intron_chr1:84039188	0.0	0.1397	0.1397	NA	1	NA	NA	NA	NA	Itpkc_intron_chr1:84039188
1	Ltbp4	294.6611	329.2239	0.164	0.7503	NC	No	No	1	Ltbp4_exon_chr1:84118461	1.0	1.0	0.0	NA	1	NA	NA	NA	NA	Ltbp4_exon_chr1:84118461
1	Shkbp1	155.3317	126.4359	-0.2905	0.7263	NC	No	No	1	Shkbp1_exon_chr1:84155119	1.0	1.0	0.0	NA	1	NA	NA	NA	NA	Shkbp1_exon_chr1:84155119
1	Pld3	925.3064	917.8674	-0.0131	0.9184	NC	No	No	1	Pld3_exon_chr1:84339758	1.0	1.0	0.0	NA	1	NA	NA	NA	NA	Pld3_exon_chr1:84339758
1	Map3k10	126.5468	192.8417	0.609	0.3369	NC	No	No	4	Map3k10_exon_chr1:84473788	0.5522	0.3247	-0.2275	NA	1	NA	NA	NA	NA	Map3k10_exon_chr1:84473788
2	Map3k10									Map3k10_intron_chr1:84480071	0.0462	0.0075	-0.0388	NA	2	NA	NA	-0.0845	NA	Map3k10_intron_chr1:84480071
3	Map3k10									Map3k10_intron_chr1:84485769	0.3805	0.6247	0.2442	NA	2	0.0875	0.044	-0.0435	NA	Map3k10_intron_chr1:84485769
4	Map3k10									Map3k10_intron_chr1:84490462	0.0211	0.0431	0.0221	NA	3	NA	NA	-0.8456	NA	Map3k10_intron_chr1:84490462
1	Marcksl1	697.7732	581.4014	-0.2615	0.4885	NC	No	No	2	Marcksl1_exon_chr1:84793159	0.9618	0.888	-0.0738	NA	4	0.9688	0.9433	-0.0255	NA	Marcksl1_exon_chr1:84793159
2	Marcksl1									Marcksl1_intron_chr1:84812249	0.0382	0.112	0.0738	NA	3	0.182	0.5199	0.3379	NA	Marcksl1_intron_chr1:84812249
1	Psmc4	373.6352	464.745	0.3183	0.4124	NC	No	No	1	Psmc4_exon_chr1:84978422	1.0	1.0	0.0	NA	1	NA	NA	NA	NA	Psmc4_exon_chr1:84978422
1	Gmfg	62.2393	98.6414	0.6731	0.4421	NC	No	No	1	Gmfg_exon_chr1:85312649	1.0	1.0	0.0	NA	1	NA	NA	NA	NA	Gmfg_exon_chr1:85312649
1	Paf1	522.8421	473.4078	-0.1406	0.6804	NC	No	No	2	Paf1_exon_chr1:85362979	0.6948	0.7669	0.0721	NA	5	0.7917	0.7993	0.0077	NA	Paf1_exon_chr1:85362979
2	Paf1									Paf1_exon_chr1:85364841	0.2887	0.2324	-0.0563	NA	1	NA	NA	NA	NA	Paf1_exon_chr1:85364841
1	Rps16	5042.9698	6508.7924	0.3684	0.2202	NC	No	No	1	Rps16_exon_chr1:85405950	1.0	1.0	0.0	NA	3	0.1054	0.1001	-0.0053	NA	Rps16_exon_chr1:85405950
1	Eid2b	18.9695	46.2454	1.3027	1.0	NC	No	No	1	Eid2b_exon_chr1:85510131	1.0	1.0	0.0	NA	5	NA	NA	-0.5251	NA	Eid2b_exon_chr1:85510131
1	Mrps12	177.8854	104.1161	-0.7729	0.1829	NC	No	No	1	Mrps12_exon_chr1:86921297	1.0	1.0	0.0	NA	1	NA	NA	NA	NA	Mrps12_exon_chr1:86921297
1	Nfkbib	164.1083	74.6562	-1.141	0.0747	DOWN	No	No	1	Nfkbib_exon_chr1:86941234	1.0	1.0	0.0	NA	1	NA	NA	NA	NA	Nfkbib_exon_chr1:86941234
1	Actn4	7625.4896	6993.2084	-0.125	0.7618	NC	No	No	1	Actn4_exon_chr1:87079204	1.0	1.0	0.0	NA	4	0.2044	0.288	0.0836	NA	Actn4_exon_chr1:87079204
1	Spint2	7.6951	18.03	1.2273	1.0	NC	No	No	1	Spint2_exon_chr1:87199846	1.0	1.0	0.0	NA	1	NA	NA	NA	NA	Spint2_exon_chr1:87199846
1	Sipa1l3	33.7732	11.2286	-1.5869	1.0	NC	No	No	3	Sipa1l3_exon_chr1:87262692	1.0	0.3197	-0.6803	Down	1	NA	NA	NA	NA	Sipa1l3_exon_chr1:87262692
2	Sipa1l3									Sipa1l3_intron_chr1:87269431	0.0	0.2553	0.2553	NA	1	NA	NA	NA	NA	Sipa1l3_intron_chr1:87269431
3	Sipa1l3									Sipa1l3_intron_chr1:87314322	0.0	0.425	0.425	NA	1	NA	NA	NA	NA	Sipa1l3_intron_chr1:87314322
1	Zfp74	120.6704	150.9936	0.3205	0.7797	NC	No	No	4	Zfp74_exon_chr1:87819706	0.4899	0.4391	-0.0508	NA	2	0.2033	0.7509	0.5476	NA	Zfp74_exon_chr1:87819706
2	Zfp74									Zfp74_exon_chr1:88234430	0.4939	0.5307	0.0367	NA	3	0.1451	0.5565	0.4113	NA	Zfp74_exon_chr1:88234430
3	Zfp74									Zfp74_intron_chr1:87841359	0.0081	0.0151	0.007	NA	1	NA	NA	NA	NA	Zfp74_intron_chr1:87841359
4	Zfp74									Zfp74_intron_chr1:88256384	0.0081	0.0151	0.007	NA	1	NA	NA	NA	NA	Zfp74_intron_chr1:88256384
1	Eif3k	1064.0836	942.6285	-0.1752	0.6227	NC	No	No	1	Eif3k_exon_chr1:87927206	1.0	1.0	0.0	NA	1	NA	NA	NA	NA	Eif3k_exon_chr1:87927206
1	Psmd8	1032.7643	932.8836	-0.1452	0.693	NC	No	No	1	Psmd8_exon_chr1:88117375	1.0	1.0	0.0	NA	3	0.7306	0.6831	-0.0475	NA	Psmd8_exon_chr1:88117375
1	Catsperg	24.2982	4.9199	-2.3224	1.0	NC	No	No	1	Catsperg_intron_chr1:88138073	1.0	1.0	0.0	NA	2	NA	NA	-0.1018	NA	Catsperg_intron_chr1:88138073
1	Capns1	2623.8636	2724.125	0.0534	0.8453	NC	No	Yes	1	Capns1_exon_chr1:88623589	1.0	1.0	0.0	NA	5	0.2972	0.3193	0.0222	Both	Capns1_exon_chr1:88623589
1	Tbcb	418.6953	454.6321	0.1179	0.6858	NC	No	No	2	Tbcb_exon_chr1:88681160	0.9937	0.9812	-0.0125	NA	2	0.2531	0.2334	-0.0197	NA	Tbcb_exon_chr1:88681160
2	Tbcb									Tbcb_intron_chr1:88685979	0.0063	0.0188	0.0125	NA	1	NA	NA	NA	NA	Tbcb_intron_chr1:88685979
1	Ovol3	6.2822	0.0	-5.293	1.0	NC	No	No	1	Ovol3_exon_chr1:88688510	1.0	1.0	0.0	NA	1	NA	NA	NA	NA	Ovol3_exon_chr1:88688510
1	Wdr62	187.7034	150.5498	-0.319	0.6972	NC	No	No	2	Wdr62_exon_chr1:88695175	0.9828	0.9204	-0.0624	NA	1	NA	NA	NA	NA	Wdr62_exon_chr1:88695175
2	Wdr62									Wdr62_intron_chr1:88715077	0.0172	0.0796	0.0624	NA	1	NA	NA	NA	NA	Wdr62_intron_chr1:88715077
1	Sdhaf1	210.3136	149.4153	-0.4924	0.4498	NC	No	No	1	Sdhaf1_exon_chr1:88780425	1.0	1.0	0.0	NA	2	0.1287	0.1136	-0.0151	NA	Sdhaf1_exon_chr1:88780425
1	Aplp1	140.0992	164.6265	0.2298	0.6615	NC	No	No	2	Aplp1_exon_chr1:88897917	0.9752	0.9978	0.0226	NA	1	NA	NA	NA	NA	Aplp1_exon_chr1:88897917
2	Aplp1									Aplp1_exon_chr1:88905365	0.0248	0.0022	-0.0226	NA	1	NA	NA	NA	NA	Aplp1_exon_chr1:88905365
1	Lin37	103.1052	71.7523	-0.5243	0.466	NC	No	No	1	Lin37_exon_chr1:89010422	1.0	1.0	0.0	NA	2	0.3786	0.5454	0.1668	NA	Lin37_exon_chr1:89010422
1	Psenen	297.6336	301.3496	0.0216	0.9371	NC	No	No	1	Psenen_exon_chr1:89016352	1.0	1.0	0.0	NA	2	0.2179	0.2142	-0.0037	NA	Psenen_exon_chr1:89016352
1	Cox6b1	2761.6098	2232.5965	-0.3068	0.1868	NC	No	No	1	Cox6b1_exon_chr1:89076206	1.0	1.0	0.0	NA	1	NA	NA	NA	NA	Cox6b1_exon_chr1:89076206
1	Rbm42	493.8145	516.1079	0.0647	0.8847	NC	No	No	1	Rbm42_exon_chr1:89099540	1.0	1.0	0.0	NA	2	0.9607	0.9808	0.0201	NA	Rbm42_exon_chr1:89099540
1	Tmem147	230.4676	348.204	0.6006	0.2454	NC	No	No	1	Tmem147_exon_chr1:89178194	1.0	1.0	0.0	NA	1	NA	NA	NA	NA	Tmem147_exon_chr1:89178194
1	Usf2	290.8601	119.0505	-1.2978	0.0044	DOWN	No	No	1	Usf2_exon_chr1:89372502	1.0	1.0	0.0	NA	2	0.9798	0.9973	0.0176	NA	Usf2_exon_chr1:89372502
1	Fxyd5	33.1131	101.7137	1.6122	0.1724	NC	No	No	1	Fxyd5_exon_chr1:89465157	1.0	1.0	0.0	NA	1	NA	NA	NA	NA	Fxyd5_exon_chr1:89465157
1	Fxyd1	9.3586	27.6138	1.5792	1.0	NC	No	No	1	Fxyd1_exon_chr1:89484334	1.0	1.0	0.0	NA	1	NA	NA	NA	NA	Fxyd1_exon_chr1:89484334
1	Scn1b	90.6144	35.0739	-1.3609	0.3852	NC	No	No	1	Scn1b_exon_chr1:89551508	1.0	1.0	0.0	NA	1	NA	NA	NA	NA	Scn1b_exon_chr1:89551508
1	Gramd1a	213.2555	103.4432	-1.0471	0.0346	DOWN	No	No	2	Gramd1a_exon_chr1:89564449	0.9244	0.892	-0.0324	NA	1	NA	NA	NA	NA	Gramd1a_exon_chr1:89564449
2	Gramd1a									Gramd1a_intron_chr1:89572662	0.0756	0.108	0.0324	NA	1	NA	NA	NA	NA	Gramd1a_intron_chr1:89572662
1	Pdcd2l	104.555	75.7861	-0.4649	0.5122	NC	No	No	2	Pdcd2l_exon_chr1:90045737	0.9856	1.0	0.0144	NA	1	NA	NA	NA	NA	Pdcd2l_exon_chr1:90045737
2	Pdcd2l									Pdcd2l_intron_chr1:90051353	0.0144	0.0	-0.0144	NA	1	NA	NA	NA	NA	Pdcd2l_intron_chr1:90051353
1	Gpi	607.8217	594.1688	-0.0383	0.8992	NC	No	No	1	Gpi_exon_chr1:90063817	1.0	1.0	0.0	NA	1	NA	NA	NA	NA	Gpi_exon_chr1:90063817
1	RGD1308428	88.6251	91.355	0.0502	1.0	NC	No	No	3	RGD1308428_exon_chr1:90099878	0.9517	0.9003	-0.0514	NA	7	0.5883	0.4553	-0.133	NA	RGD1308428_exon_chr1:90099878
2	RGD1308428									RGD1308428_exon_chr1:90116631	0.0483	0.0332	-0.015	NA	1	NA	NA	NA	NA	RGD1308428_exon_chr1:90116631
3	RGD1308428									RGD1308428_intron_chr1:90149089	0.0	0.0665	0.0665	NA	1	NA	NA	NA	NA	RGD1308428_intron_chr1:90149089
1	Lsm14a	1070.5924	625.4744	-0.7758	0.0182	DOWN	No	Yes	5	Lsm14a_exon_chr1:90202182	0.4506	0.5961	0.1455	NA	8	0.9046	0.6227	-0.282	Both	Lsm14a_exon_chr1:90202182
2	Lsm14a									Lsm14a_exon_chr1:90210527	0.5228	0.3607	-0.1622	Down	1	NA	NA	NA	NA	Lsm14a_exon_chr1:90210527
3	Lsm14a									Lsm14a_exon_chr1:90215839	0.0	0.0111	0.0111	NA	1	NA	NA	NA	NA	Lsm14a_exon_chr1:90215839
4	Lsm14a									Lsm14a_intron_chr1:90227482	0.0019	0.011	0.0092	NA	1	NA	NA	NA	NA	Lsm14a_intron_chr1:90227482
5	Lsm14a									Lsm14a_intron_chr1:90246017	0.0149	0.0205	0.0056	NA	5	NA	NA	-0.4179	NA	Lsm14a_intron_chr1:90246017
1	Kctd15	62.0666	72.4541	0.2381	0.8269	NC	No	Yes	1	Kctd15_exon_chr1:90508133	1.0	1.0	0.0	NA	4	0.9483	0.8715	-0.0769	Both	Kctd15_exon_chr1:90508133
1	Alkbh6	157.9467	131.2808	-0.2636	0.7928	NC	No	No	1	Alkbh6_exon_chr1:90957524	1.0	1.0	0.0	NA	2	0.0592	0.0786	0.0194	NA	Alkbh6_exon_chr1:90957524
1	Clip3	8.4567	41.1403	2.3212	0.0155	UP	No	No	2	Clip3_exon_chr1:90964495	0.762	0.8349	0.0729	NA	1	NA	NA	NA	NA	Clip3_exon_chr1:90964495
2	Clip3									Clip3_intron_chr1:90978249	0.238	0.1651	-0.0729	NA	1	NA	NA	NA	NA	Clip3_intron_chr1:90978249
1	Polr2i	101.8739	83.661	-0.2857	0.7503	NC	No	No	1	Polr2i_exon_chr1:91041276	1.0	1.0	0.0	NA	1	NA	NA	NA	NA	Polr2i_exon_chr1:91041276
1	Pdcd5	7937.5962	3370.1106	-1.2363	0.0	DOWN	No	No	6	Pdcd5_exon_chr1:91173672	0.1076	0.2459	0.1383	NA	1	NA	NA	NA	NA	Pdcd5_exon_chr1:91173672
2	Pdcd5									Pdcd5_exon_chr1:91174000	0.3178	0.1827	-0.1351	Down	1	NA	NA	NA	NA	Pdcd5_exon_chr1:91174000
3	Pdcd5									Pdcd5_exon_chr1:91177515	0.0748	0.0718	-0.003	NA	1	NA	NA	NA	NA	Pdcd5_exon_chr1:91177515
4	Pdcd5									Pdcd5_exon_chr1:91961216	0.1065	0.2434	0.1368	NA	1	NA	NA	NA	NA	Pdcd5_exon_chr1:91961216
5	Pdcd5									Pdcd5_exon_chr1:91965143	0.075	0.0726	-0.0024	NA	1	NA	NA	NA	NA	Pdcd5_exon_chr1:91965143
6	Pdcd5									Pdcd5_intron_chr1:91961472	0.318	0.1813	-0.1367	Down	1	NA	NA	NA	NA	Pdcd5_intron_chr1:91961472
1	Cebpg	72.9069	334.3733	2.2056	0.0	UP	No	Yes	1	Cebpg_exon_chr1:91291185	1.0	1.0	0.0	NA	5	0.812	0.9869	0.1749	Lengthening	Cebpg_exon_chr1:91291185
1	Gpatch1	173.2321	134.4304	-0.3701	0.4777	NC	No	No	5	Gpatch1_exon_chr1:91529377	0.1724	0.1873	0.0149	NA	1	NA	NA	NA	NA	Gpatch1_exon_chr1:91529377
2	Gpatch1									Gpatch1_exon_chr1:91537626	0.1308	0.047	-0.0837	NA	1	NA	NA	NA	NA	Gpatch1_exon_chr1:91537626
3	Gpatch1									Gpatch1_exon_chr1:91539828	0.2773	0.2429	-0.0344	NA	2	0.9149	0.8463	-0.0686	NA	Gpatch1_exon_chr1:91539828
4	Gpatch1									Gpatch1_exon_chr1:91553649	0.3786	0.52	0.1414	NA	1	NA	NA	NA	NA	Gpatch1_exon_chr1:91553649
5	Gpatch1									Gpatch1_intron_chr1:91537477	0.0409	0.0027	-0.0382	NA	1	NA	NA	NA	NA	Gpatch1_intron_chr1:91537477
1	Nudt19	153.1735	102.3827	-0.5726	0.3367	NC	No	No	2	Nudt19_exon_chr1:91820721	0.9694	1.0	0.0306	NA	2	0.8954	0.877	-0.0185	NA	Nudt19_exon_chr1:91820721
2	Nudt19									Nudt19_intron_chr1:91827061	0.0306	0.0	-0.0306	NA	1	NA	NA	NA	NA	Nudt19_intron_chr1:91827061
1	Dpy19l3	81.7218	139.8833	0.775	0.2486	NC	No	Yes	4	Dpy19l3_exon_chr1:92008316	0.9582	0.8021	-0.1561	NA	7	0.7784	0.5039	-0.2745	Both	Dpy19l3_exon_chr1:92008316
2	Dpy19l3									Dpy19l3_intron_chr1:92019481	0.0	0.0202	0.0202	NA	1	NA	NA	NA	NA	Dpy19l3_intron_chr1:92019481
3	Dpy19l3									Dpy19l3_intron_chr1:92064271	0.0418	0.0717	0.0299	NA	2	NA	NA	-0.0343	NA	Dpy19l3_intron_chr1:92064271
4	Dpy19l3									Dpy19l3_intron_chr1:92067367	0.0	0.106	0.106	NA	1	NA	NA	NA	NA	Dpy19l3_intron_chr1:92067367
1	Tshz3	188.1168	157.1186	-0.2557	0.7297	NC	No	Yes	2	Tshz3_exon_chr1:92708040	0.8538	0.9203	0.0665	NA	7	0.8907	0.7246	-0.166	Both	Tshz3_exon_chr1:92708040
2	Tshz3									Tshz3_intron_chr1:92774929	0.1462	0.0797	-0.0665	NA	5	NA	NA	-0.025	NA	Tshz3_intron_chr1:92774929
1	Uri1	440.144	405.4855	-0.1212	0.7834	NC	No	No	7	Uri1_exon_chr1:94348152	0.1206	0.3171	0.1965	Up	5	0.7612	0.107	-0.6542	NA	Uri1_exon_chr1:94348152
2	Uri1									Uri1_exon_chr1:94352064	0.6797	0.5234	-0.1562	NA	1	NA	NA	NA	NA	Uri1_exon_chr1:94352064
3	Uri1									Uri1_exon_chr1:94354074	0.0157	0.0	-0.0157	NA	1	NA	NA	NA	NA	Uri1_exon_chr1:94354074
4	Uri1									Uri1_exon_chr1:94356467	0.0214	0.0009	-0.0205	NA	1	NA	NA	NA	NA	Uri1_exon_chr1:94356467
5	Uri1									Uri1_exon_chr1:94367588	0.0727	0.0681	-0.0046	NA	1	NA	NA	NA	NA	Uri1_exon_chr1:94367588
6	Uri1									Uri1_intron_chr1:94381959	0.0111	0.0	-0.0111	NA	1	NA	NA	NA	NA	Uri1_intron_chr1:94381959
7	Uri1									Uri1_intron_chr1:94403913	0.0788	0.0905	0.0117	NA	1	NA	NA	NA	NA	Uri1_intron_chr1:94403913
1	Ccne1	215.6117	133.8115	-0.6802	0.3185	NC	No	No	1	Ccne1_exon_chr1:94486476	1.0	1.0	0.0	NA	1	NA	NA	NA	NA	Ccne1_exon_chr1:94486476
1	Plekhf1	163.3272	178.1551	0.1169	0.7892	NC	No	No	1	Plekhf1_exon_chr1:94610844	1.0	1.0	0.0	NA	1	NA	NA	NA	NA	Plekhf1_exon_chr1:94610844
1	Pop4	243.7703	167.322	-0.5427	0.1957	NC	No	No	2	Pop4_exon_chr1:94661618	0.431	0.4026	-0.0284	NA	1	NA	NA	NA	NA	Pop4_exon_chr1:94661618
2	Pop4									Pop4_exon_chr1:94669461	0.569	0.5974	0.0284	NA	2	0.9004	0.7558	-0.1446	NA	Pop4_exon_chr1:94669461
1	Etfb	574.3741	319.9196	-0.846	0.0123	DOWN	No	No	2	Etfb_exon_chr1:98472989	0.948	0.9769	0.0289	NA	1	NA	NA	NA	NA	Etfb_exon_chr1:98472989
2	Etfb									Etfb_exon_chr1:98474094	0.0398	0.0231	-0.0166	NA	2	NA	NA	-0.1841	NA	Etfb_exon_chr1:98474094
1	Siglec10	99.3734	108.0456	0.1209	0.9444	NC	No	No	1	Siglec10_exon_chr1:98513646	1.0	1.0	0.0	NA	2	0.9392	0.9922	0.053	NA	Siglec10_exon_chr1:98513646
1	Klk1c10	3.5185	1.4989	-1.2249	1.0	NC	No	No	1	Klk1c10_intron_chr1:99890043	1.0	1.0	0.0	NA	3	NA	NA	-0.1666	NA	Klk1c10_intron_chr1:99890043
1	Emc10	497.1764	713.7079	0.5242	0.1097	NC	No	No	1	Emc10_exon_chr1:100495982	1.0	1.0	0.0	NA	7	0.9527	0.9108	-0.0419	NA	Emc10_exon_chr1:100495982
1	Pold1	3.4927	14.988	2.1659	1.0	NC	No	No	1	Pold1_exon_chr1:100538211	1.0	1.0	0.0	NA	1	NA	NA	NA	NA	Pold1_exon_chr1:100538211
1	Nr1h2	164.8977	274.1039	0.738	0.0473	UP	No	No	1	Nr1h2_exon_chr1:100555079	1.0	1.0	0.0	NA	1	NA	NA	NA	NA	Nr1h2_exon_chr1:100555079
1	Tbc1d17	72.4516	87.846	0.2671	0.8541	NC	No	No	1	Tbc1d17_exon_chr1:100837380	1.0	1.0	0.0	NA	1	NA	NA	NA	NA	Tbc1d17_exon_chr1:100837380
1	Ptov1	751.8616	1064.9697	0.5027	0.0493	NC	No	No	1	Ptov1_exon_chr1:100859723	1.0	1.0	0.0	NA	1	NA	NA	NA	NA	Ptov1_exon_chr1:100859723
1	Med25	323.4187	445.4999	0.4584	0.1254	NC	No	No	1	Med25_exon_chr1:100875108	1.0	1.0	0.0	NA	1	NA	NA	NA	NA	Med25_exon_chr1:100875108
1	Ap2a1	98.2834	125.4844	0.3485	0.7679	NC	No	No	2	Ap2a1_intron_chr1:100913424	0.0	0.0497	0.0497	NA	2	NA	NA	0.3335	NA	Ap2a1_intron_chr1:100913424
2	Ap2a1									Ap2a1_intron_chr1:100926268	1.0	0.9474	-0.0526	NA	9	0.0152	0.049	0.0338	NA	Ap2a1_intron_chr1:100926268
1	Cpt1c	145.4604	79.4205	-0.8834	0.0981	DOWN	No	No	2	Cpt1c_exon_chr1:100955403	0.9413	1.0	0.0587	NA	1	NA	NA	NA	NA	Cpt1c_exon_chr1:100955403
2	Cpt1c									Cpt1c_intron_chr1:100964413	0.0587	0.0	-0.0587	NA	1	NA	NA	NA	NA	Cpt1c_intron_chr1:100964413
1	Prmt1	1419.8266	1453.037	0.0338	0.8752	NC	No	No	1	Prmt1_exon_chr1:100971356	1.0	1.0	0.0	NA	1	NA	NA	NA	NA	Prmt1_exon_chr1:100971356
1	Bcl2l12	57.3117	77.27	0.4419	0.6615	NC	No	No	1	Bcl2l12_exon_chr1:100985248	1.0	1.0	0.0	NA	1	NA	NA	NA	NA	Bcl2l12_exon_chr1:100985248
1	Scaf1	50.9328	22.551	-1.1949	0.3624	NC	No	No	2	Scaf1_exon_chr1:100998133	0.8837	1.0	0.1163	NA	1	NA	NA	NA	NA	Scaf1_exon_chr1:100998133
2	Scaf1									Scaf1_exon_chr1:101003442	0.1163	0.0	-0.1163	NA	1	NA	NA	NA	NA	Scaf1_exon_chr1:101003442
1	Rcn3	1366.8142	2433.6929	0.8324	0.0155	UP	No	No	1	Rcn3_exon_chr1:101077404	1.0	1.0	0.0	NA	1	NA	NA	NA	NA	Rcn3_exon_chr1:101077404
1	Fcgrt	831.6026	639.3705	-0.3789	0.1829	NC	No	No	3	Fcgrt_exon_chr1:101087233	0.9271	0.918	-0.0091	NA	2	0.8653	0.7803	-0.085	NA	Fcgrt_exon_chr1:101087233
2	Fcgrt									Fcgrt_intron_chr1:101094233	0.0205	0.0444	0.0239	NA	4	0.5338	0.4182	-0.1156	NA	Fcgrt_intron_chr1:101094233
3	Fcgrt									Fcgrt_intron_chr1:101095322	0.0524	0.0302	-0.0221	NA	2	NA	NA	-0.1142	NA	Fcgrt_intron_chr1:101095322
1	Rps11	6133.8685	4192.5683	-0.549	0.031	NC	No	No	1	Rps11_exon_chr1:101116819	1.0	1.0	0.0	NA	1	NA	NA	NA	NA	Rps11_exon_chr1:101116819
1	Rpl13a	13538.4899	9042.6564	-0.5824	0.0636	NC	No	Yes	1	Rpl13a_exon_chr1:101120823	1.0	1.0	0.0	NA	3	0.6783	0.9052	0.2269	Lengthening	Rpl13a_exon_chr1:101120823
1	Flt3lg	8.2238	3.0357	-1.5016	1.0	NC	No	No	1	Flt3lg_exon_chr1:101126249	1.0	1.0	0.0	NA	1	NA	NA	NA	NA	Flt3lg_exon_chr1:101126249
1	Aldh16a1	192.3045	109.749	-0.8077	0.2452	NC	No	No	1	Aldh16a1_exon_chr1:101138509	1.0	1.0	0.0	NA	1	NA	NA	NA	NA	Aldh16a1_exon_chr1:101138509
1	Trpm4	18.648	9.552	-0.9842	1.0	NC	No	No	1	Trpm4_exon_chr1:101293834	1.0	1.0	0.0	NA	1	NA	NA	NA	NA	Trpm4_exon_chr1:101293834
1	Snrnp70	26.9582	24.8405	-0.1407	0.9444	NC	No	No	3	Snrnp70_exon_chr1:101384568	0.1269	0.1174	-0.0095	NA	1	NA	NA	NA	NA	Snrnp70_exon_chr1:101384568
2	Snrnp70									Snrnp70_exon_chr1:101384804	0.7537	0.8826	0.1289	NA	1	NA	NA	NA	NA	Snrnp70_exon_chr1:101384804
3	Snrnp70									Snrnp70_intron_chr1:101384513	0.1194	0.0	-0.1194	NA	1	NA	NA	NA	NA	Snrnp70_intron_chr1:101384513
1	Ruvbl2	148.1999	210.6104	0.5016	0.2246	NC	No	No	2	Ruvbl2_exon_chr1:101413875	0.9711	0.9973	0.0262	NA	1	NA	NA	NA	NA	Ruvbl2_exon_chr1:101413875
2	Ruvbl2									Ruvbl2_intron_chr1:101423605	0.0289	0.0027	-0.0262	NA	1	NA	NA	NA	NA	Ruvbl2_intron_chr1:101423605
1	Ftl1	41431.1942	27607.5712	-0.5856	0.0199	DOWN	No	No	1	Ftl1_exon_chr1:101448522	1.0	1.0	0.0	NA	1	NA	NA	NA	NA	Ftl1_exon_chr1:101448522
1	Bax	2047.4752	893.4138	-1.1987	0.0003	DOWN	No	No	1	Bax_exon_chr1:101452069	1.0	1.0	0.0	NA	2	0.9805	0.9693	-0.0112	NA	Bax_exon_chr1:101452069
1	Nucb1	118.664	278.2046	1.2202	0.0262	UP	No	No	2	Nucb1_exon_chr1:101481193	1.0	0.9882	-0.0118	NA	2	0.1069	0.0838	-0.0231	NA	Nucb1_exon_chr1:101481193
2	Nucb1									Nucb1_intron_chr1:101490357	0.0	0.0118	0.0118	NA	1	NA	NA	NA	NA	Nucb1_intron_chr1:101490357
1	Ppp1r15a	201.2271	139.8618	-0.5246	0.3127	NC	No	No	2	Ppp1r15a_exon_chr1:101512316	0.9841	1.0	0.0159	NA	1	NA	NA	NA	NA	Ppp1r15a_exon_chr1:101512316
2	Ppp1r15a									Ppp1r15a_intron_chr1:101512759	0.0159	0.0	-0.0159	NA	1	NA	NA	NA	NA	Ppp1r15a_intron_chr1:101512759
1	Sphk2	79.4735	38.6714	-1.0367	0.1109	NC	No	No	1	Sphk2_exon_chr1:101694491	1.0	1.0	0.0	NA	1	NA	NA	NA	NA	Sphk2_exon_chr1:101694491
1	Cyth2	225.9077	286.2221	0.3432	0.6522	NC	No	No	2	Cyth2_exon_chr1:101796614	0.9767	0.9793	0.0026	NA	1	NA	NA	NA	NA	Cyth2_exon_chr1:101796614
2	Cyth2									Cyth2_intron_chr1:101802984	0.013	0.0207	0.0078	NA	1	NA	NA	NA	NA	Cyth2_intron_chr1:101802984
1	Grwd1	57.5295	106.1184	0.8837	0.4259	NC	No	No	1	Grwd1_exon_chr1:101814200	1.0	1.0	0.0	NA	1	NA	NA	NA	NA	Grwd1_exon_chr1:101814200
1	Grin2d	4.5238	13.4945	1.5945	1.0	NC	No	No	1	Grin2d_intron_chr1:101839738	1.0	1.0	0.0	NA	1	NA	NA	NA	NA	Grin2d_intron_chr1:101839738
1	Syngr4	2.5715	1.1384	-1.2085	1.0	NC	No	No	1	Syngr4_exon_chr1:101873445	1.0	1.0	0.0	NA	1	NA	NA	NA	NA	Syngr4_exon_chr1:101873445
1	Emp3	4579.0495	2627.2236	-0.8017	0.0127	DOWN	No	No	1	Emp3_exon_chr1:101900940	1.0	1.0	0.0	NA	1	NA	NA	NA	NA	Emp3_exon_chr1:101900940
1	Tph1	15.4226	0.3795	-5.6213	0.2993	NC	No	No	1	Tph1_exon_chr1:102672484	1.0	1.0	0.0	NA	2	NA	NA	-0.6667	NA	Tph1_exon_chr1:102672484
1	Hps5	27.2687	27.766	0.0051	1.0	NC	No	No	5	Hps5_exon_chr1:102811203	0.6022	0.1962	-0.406	NA	1	NA	NA	NA	NA	Hps5_exon_chr1:102811203
2	Hps5									Hps5_exon_chr1:102824095	0.1853	0.1861	0.0007	NA	1	NA	NA	NA	NA	Hps5_exon_chr1:102824095
3	Hps5									Hps5_intron_chr1:102823520	0.0747	0.5441	0.4693	NA	1	NA	NA	NA	NA	Hps5_intron_chr1:102823520
4	Hps5									Hps5_intron_chr1:102835083	0.1377	0.0	-0.1377	NA	1	NA	NA	NA	NA	Hps5_intron_chr1:102835083
5	Hps5									Hps5_intron_chr1:102849247	0.0	0.0737	0.0737	NA	1	NA	NA	NA	NA	Hps5_intron_chr1:102849247
1	Tsg101	690.0038	380.7432	-0.8605	0.0164	DOWN	No	No	2	Tsg101_exon_chr1:102941566	0.2984	0.5465	0.2481	NA	4	0.6355	0.6002	-0.0353	NA	Tsg101_exon_chr1:102941566
2	Tsg101									Tsg101_exon_chr1:102942709	0.6931	0.4497	-0.2434	NA	2	0.3926	0.3839	-0.0087	NA	Tsg101_exon_chr1:102942709
1	Csrp3	11.8285	31.7527	1.4337	0.5138	NC	No	No	1	Csrp3_exon_chr1:104147505	1.0	1.0	0.0	NA	1	NA	NA	NA	NA	Csrp3_exon_chr1:104147505
1	E2f8	12.9504	3.421	-1.9309	1.0	NC	No	No	1	E2f8_exon_chr1:104187282	1.0	1.0	0.0	NA	1	NA	NA	NA	NA	E2f8_exon_chr1:104187282
1	Nipa2	56.494	177.7071	1.6398	0.0081	UP	No	Yes	4	Nipa2_exon_chr1:114349966	0.3086	0.9288	0.6202	Up	13	NA	NA	-0.1465	Shortening	Nipa2_exon_chr1:114349966
2	Nipa2									Nipa2_exon_chr1:114361312	0.1033	0.0	-0.1033	NA	1	NA	NA	NA	NA	Nipa2_exon_chr1:114361312
3	Nipa2									Nipa2_intron_chr1:114359594	0.588	0.0565	-0.5315	NA	3	NA	NA	-0.1908	NA	Nipa2_intron_chr1:114359594
4	Nipa2									Nipa2_intron_chr1:114370823	0.0	0.0147	0.0147	NA	1	NA	NA	NA	NA	Nipa2_intron_chr1:114370823
1	Nipa1	0.9967	16.0386	4.099	1.0	NC	No	No	2	Nipa1_exon_chr1:114388141	1.0	0.9559	-0.0441	NA	2	NA	NA	0.0035	NA	Nipa1_exon_chr1:114388141
2	Nipa1									Nipa1_intron_chr1:114404371	0.0	0.0441	0.0441	NA	1	NA	NA	NA	NA	Nipa1_intron_chr1:114404371
1	Bex1	111.5685	45.3386	-1.301	0.1417	NC	No	No	1	Bex1_exon_chr1:116566386	1.0	1.0	0.0	NA	3	0.5016	0.6122	0.1105	NA	Bex1_exon_chr1:116566386
1	Peg12	25.45	5.6351	-2.1858	1.0	NC	No	No	1	Peg12_exon_chr1:123100464	1.0	1.0	0.0	NA	2	NA	NA	-0.0386	NA	Peg12_exon_chr1:123100464
1	Klf13	30.8434	18.3004	-0.747	1.0	NC	No	No	2	Klf13_exon_chr1:124772996	0.9527	0.9806	0.0279	NA	2	0.0241	0.1242	0.1001	NA	Klf13_exon_chr1:124772996
2	Klf13									Klf13_intron_chr1:124803162	0.0473	0.0194	-0.0279	NA	3	NA	NA	NA	NA	Klf13_intron_chr1:124803162
1	Mphosph10	924.5064	577.4982	-0.6836	0.0194	DOWN	No	No	5	Mphosph10_exon_chr1:125213134	0.0909	0.0856	-0.0053	NA	3	0.1533	0.0827	-0.0706	NA	Mphosph10_exon_chr1:125213134
2	Mphosph10									Mphosph10_exon_chr1:125213723	0.3702	0.3437	-0.0265	NA	1	NA	NA	NA	NA	Mphosph10_exon_chr1:125213723
3	Mphosph10									Mphosph10_exon_chr1:125215277	0.019	0.0275	0.0085	NA	1	NA	NA	NA	NA	Mphosph10_exon_chr1:125215277
4	Mphosph10									Mphosph10_exon_chr1:125219764	0.0067	0.0173	0.0106	NA	1	NA	NA	NA	NA	Mphosph10_exon_chr1:125219764
5	Mphosph10									Mphosph10_exon_chr1:125227159	0.5132	0.5259	0.0127	NA	2	0.2057	0.2527	0.0471	NA	Mphosph10_exon_chr1:125227159
1	Nsmce3	155.4274	111.141	-0.4866	0.3868	NC	No	No	1	Nsmce3_exon_chr1:125665314	1.0	1.0	0.0	NA	3	0.495	0.4863	-0.0087	NA	Nsmce3_exon_chr1:125665314
1	Tjp1	412.888	541.7696	0.3917	0.2794	NC	No	Yes	4	Tjp1_exon_chr1:126147984	0.8409	0.7609	-0.0801	NA	9	0.9571	0.6548	-0.3023	NA	Tjp1_exon_chr1:126147984
2	Tjp1									Tjp1_exon_chr1:126192895	0.0684	0.1354	0.067	NA	2	1.0	0.2387	-0.7613	Shortening	Tjp1_exon_chr1:126192895
3	Tjp1									Tjp1_exon_chr1:126194654	0.0149	0.095	0.0801	NA	1	NA	NA	NA	NA	Tjp1_exon_chr1:126194654
4	Tjp1									Tjp1_intron_chr1:126188350	0.0659	0.0087	-0.0571	NA	1	NA	NA	NA	NA	Tjp1_intron_chr1:126188350
1	Lrrk1	18.1776	25.4872	0.4884	1.0	NC	No	No	4	Lrrk1_intron_chr1:127177105	0.0642	0.0911	0.0268	NA	1	NA	NA	NA	NA	Lrrk1_intron_chr1:127177105
2	Lrrk1									Lrrk1_intron_chr1:127192550	0.0	0.0911	0.0911	NA	1	NA	NA	NA	NA	Lrrk1_intron_chr1:127192550
3	Lrrk1									Lrrk1_intron_chr1:127254883	0.574	0.6763	0.1023	NA	4	NA	NA	-0.0943	NA	Lrrk1_intron_chr1:127254883
4	Lrrk1									Lrrk1_intron_chr1:127291875	0.3618	0.1416	-0.2202	NA	1	NA	NA	NA	NA	Lrrk1_intron_chr1:127291875
1	Asb7	67.2975	26.2202	-1.366	0.6452	NC	No	No	2	Asb7_intron_chr1:127557869	1.0	0.9341	-0.0659	NA	4	NA	NA	-0.1426	NA	Asb7_intron_chr1:127557869
2	Asb7									Asb7_intron_chr1:127589259	0.0	0.0659	0.0659	NA	1	NA	NA	NA	NA	Asb7_intron_chr1:127589259
1	Mef2a	323.1274	350.9454	0.1185	0.7736	NC	No	No	8	Mef2a_exon_chr1:128211760	0.4878	0.5678	0.08	NA	13	0.6266	0.663	0.0364	NA	Mef2a_exon_chr1:128211760
2	Mef2a									Mef2a_exon_chr1:128242835	0.1592	0.117	-0.0421	NA	1	NA	NA	NA	NA	Mef2a_exon_chr1:128242835
3	Mef2a									Mef2a_exon_chr1:128287291	0.063	0.0127	-0.0503	NA	1	NA	NA	NA	NA	Mef2a_exon_chr1:128287291
4	Mef2a									Mef2a_intron_chr1:128239551	0.0108	0.0541	0.0433	NA	1	NA	NA	NA	NA	Mef2a_intron_chr1:128239551
5	Mef2a									Mef2a_intron_chr1:128267051	0.0436	0.0272	-0.0163	NA	3	NA	NA	-0.3041	NA	Mef2a_intron_chr1:128267051
6	Mef2a									Mef2a_intron_chr1:128287097	0.1038	0.0945	-0.0093	NA	7	0.4694	0.6554	0.186	NA	Mef2a_intron_chr1:128287097
7	Mef2a									Mef2a_intron_chr1:128314930	0.0259	0.0128	-0.0132	NA	3	NA	NA	-0.0378	NA	Mef2a_intron_chr1:128314930
8	Mef2a									Mef2a_intron_chr1:128341155	0.096	0.1062	0.0102	NA	1	NA	NA	NA	NA	Mef2a_intron_chr1:128341155
1	Lrrc28	20.9455	54.1159	1.3793	0.2036	NC	No	Yes	2	Lrrc28_exon_chr1:128487872	0.9302	1.0	0.0698	NA	2	0.6769	0.0084	-0.6686	Shortening	Lrrc28_exon_chr1:128487872
2	Lrrc28									Lrrc28_intron_chr1:128600246	0.0698	0.0	-0.0698	NA	1	NA	NA	NA	NA	Lrrc28_intron_chr1:128600246
1	Synm	49.3317	25.9919	-0.9507	0.3374	NC	No	No	1	Synm_exon_chr1:128698312	1.0	1.0	0.0	NA	6	NA	NA	0.1682	NA	Synm_exon_chr1:128698312
1	Nr2f2	660.8076	941.0444	0.51	0.1563	NC	No	Yes	2	Nr2f2_exon_chr1:131449153	0.9883	0.9841	-0.0042	NA	6	0.5946	0.492	-0.1027	Shortening	Nr2f2_exon_chr1:131449153
2	Nr2f2									Nr2f2_intron_chr1:131451932	0.0113	0.0096	-0.0016	NA	1	NA	NA	NA	NA	Nr2f2_intron_chr1:131451932
1	Chd2	1167.2646	566.4807	-1.0445	0.1154	NC	No	No	11	Chd2_exon_chr1:134775073	0.0503	0.0327	-0.0176	NA	1	NA	NA	NA	NA	Chd2_exon_chr1:134775073
2	Chd2									Chd2_exon_chr1:134782667	0.4463	0.4431	-0.0031	NA	2	0.9363	0.9549	0.0186	NA	Chd2_exon_chr1:134782667
3	Chd2									Chd2_exon_chr1:134786705	0.0752	0.0976	0.0223	NA	1	NA	NA	NA	NA	Chd2_exon_chr1:134786705
4	Chd2									Chd2_exon_chr1:134794403	0.01	0.0144	0.0044	NA	1	NA	NA	NA	NA	Chd2_exon_chr1:134794403
5	Chd2									Chd2_exon_chr1:134801821	0.0208	0.0158	-0.0049	NA	1	NA	NA	NA	NA	Chd2_exon_chr1:134801821
6	Chd2									Chd2_exon_chr1:134817451	0.0568	0.0392	-0.0176	NA	1	NA	NA	NA	NA	Chd2_exon_chr1:134817451
7	Chd2									Chd2_exon_chr1:134832436	0.074	0.1212	0.0472	NA	1	NA	NA	NA	NA	Chd2_exon_chr1:134832436
8	Chd2									Chd2_exon_chr1:134835449	0.0238	0.0141	-0.0097	NA	2	NA	NA	-0.241	NA	Chd2_exon_chr1:134835449
9	Chd2									Chd2_exon_chr1:134843221	0.2027	0.1806	-0.0221	NA	1	NA	NA	NA	NA	Chd2_exon_chr1:134843221
10	Chd2									Chd2_exon_chr1:134870326	0.0049	0.0118	0.0069	NA	1	NA	NA	NA	NA	Chd2_exon_chr1:134870326
11	Chd2									Chd2_intron_chr1:134772221	0.012	0.0118	-0.0002	NA	1	NA	NA	NA	NA	Chd2_intron_chr1:134772221
1	Slco3a1	160.4647	283.8367	0.8254	0.017	UP	No	No	5	Slco3a1_exon_chr1:135800180	0.3807	0.398	0.0173	NA	3	1.0	0.9457	-0.0543	NA	Slco3a1_exon_chr1:135800180
2	Slco3a1									Slco3a1_exon_chr1:136073483	0.2163	0.1767	-0.0395	NA	1	NA	NA	NA	NA	Slco3a1_exon_chr1:136073483
3	Slco3a1									Slco3a1_intron_chr1:135843779	0.0335	0.0109	-0.0226	NA	1	NA	NA	NA	NA	Slco3a1_intron_chr1:135843779
4	Slco3a1									Slco3a1_intron_chr1:136017016	0.3452	0.3611	0.016	NA	13	0.4058	0.3544	-0.0515	NA	Slco3a1_intron_chr1:136017016
5	Slco3a1									Slco3a1_intron_chr1:136073303	0.0244	0.0532	0.0289	NA	2	NA	NA	0.4346	NA	Slco3a1_intron_chr1:136073303
1	Klhl25	15.4724	23.8529	0.6033	1.0	NC	No	No	1	Klhl25_exon_chr1:137335260	1.0	1.0	0.0	NA	1	NA	NA	NA	NA	Klhl25_exon_chr1:137335260
1	Mrpl46	150.8124	99.6786	-0.6041	0.3511	NC	No	No	3	Mrpl46_exon_chr1:140470090	0.8573	0.9069	0.0496	NA	1	NA	NA	NA	NA	Mrpl46_exon_chr1:140470090
2	Mrpl46									Mrpl46_exon_chr1:140475115	0.0659	0.0381	-0.0277	NA	1	NA	NA	NA	NA	Mrpl46_exon_chr1:140475115
3	Mrpl46									Mrpl46_exon_chr1:140476019	0.0769	0.055	-0.0219	NA	1	NA	NA	NA	NA	Mrpl46_exon_chr1:140476019
1	Hapln3	12.5816	10.3519	-0.2799	1.0	NC	No	No	1	Hapln3_exon_chr1:140827755	1.0	1.0	0.0	NA	1	NA	NA	NA	NA	Hapln3_exon_chr1:140827755
1	Mfge8	1713.2516	2074.6559	0.2764	0.3678	NC	No	No	1	Mfge8_exon_chr1:140846253	1.0	1.0	0.0	NA	1	NA	NA	NA	NA	Mfge8_exon_chr1:140846253
1	Polg	10.2795	5.0808	-1.0115	1.0	NC	No	No	1	Polg_exon_chr1:141182529	1.0	1.0	0.0	NA	1	NA	NA	NA	NA	Polg_exon_chr1:141182529
1	Ap3s2	121.7638	150.9197	0.3155	0.661	NC	No	No	2	Ap3s2_exon_chr1:141613789	0.8608	0.9713	0.1106	NA	2	0.9603	0.9847	0.0244	NA	Ap3s2_exon_chr1:141613789
2	Ap3s2									Ap3s2_intron_chr1:141641683	0.1392	0.0287	-0.1106	NA	1	NA	NA	NA	NA	Ap3s2_intron_chr1:141641683
1	Arpin	72.4155	183.1902	1.3408	0.0141	UP	No	No	1	Arpin_exon_chr1:141665896	1.0	1.0	0.0	NA	2	0.6612	0.696	0.0348	NA	Arpin_exon_chr1:141665896
1	Idh2	556.2164	847.7175	0.6098	0.0826	UP	No	No	4	Idh2_exon_chr1:141874725	0.9321	0.9649	0.0327	NA	3	0.9863	0.9596	-0.0267	NA	Idh2_exon_chr1:141874725
2	Idh2									Idh2_exon_chr1:141877533	0.0114	0.0	-0.0114	NA	1	NA	NA	NA	NA	Idh2_exon_chr1:141877533
3	Idh2									Idh2_intron_chr1:141875155	0.0	0.0272	0.0272	NA	1	NA	NA	NA	NA	Idh2_intron_chr1:141875155
4	Idh2									Idh2_intron_chr1:141893530	0.0457	0.0075	-0.0381	NA	5	NA	NA	-0.1356	NA	Idh2_intron_chr1:141893530
1	Cib1	315.0825	429.9206	0.4527	0.364	NC	No	No	1	Cib1_exon_chr1:142015189	1.0	1.0	0.0	NA	1	NA	NA	NA	NA	Cib1_exon_chr1:142015189
1	Unc45a	572.8836	349.454	-0.7168	0.0387	DOWN	No	No	1	Unc45a_exon_chr1:142119517	1.0	1.0	0.0	NA	1	NA	NA	NA	NA	Unc45a_exon_chr1:142119517
1	Man2a2	41.1062	84.8073	1.0441	0.3984	NC	No	No	2	Man2a2_exon_chr1:142144351	0.8498	0.9957	0.1459	NA	2	0.8728	0.9978	0.125	NA	Man2a2_exon_chr1:142144351
2	Man2a2									Man2a2_intron_chr1:142151491	0.1502	0.0043	-0.1459	NA	1	NA	NA	NA	NA	Man2a2_intron_chr1:142151491
1	Furin	704.722	414.6054	-0.7661	0.0274	DOWN	No	No	1	Furin_exon_chr1:142187121	1.0	1.0	0.0	NA	1	NA	NA	NA	NA	Furin_exon_chr1:142187121
1	Iqgap1	336.304	491.2059	0.547	0.2935	NC	No	Yes	8	Iqgap1_exon_chr1:142526239	0.0925	0.385	0.2925	Up	3	0.9002	0.6171	-0.2831	Shortening	Iqgap1_exon_chr1:142526239
2	Iqgap1									Iqgap1_exon_chr1:142533851	0.0958	0.0461	-0.0497	NA	1	NA	NA	NA	NA	Iqgap1_exon_chr1:142533851
3	Iqgap1									Iqgap1_exon_chr1:142537799	0.6431	0.461	-0.1821	NA	2	0.1873	0.2153	0.028	NA	Iqgap1_exon_chr1:142537799
4	Iqgap1									Iqgap1_exon_chr1:142574365	0.1168	0.0415	-0.0754	NA	1	NA	NA	NA	NA	Iqgap1_exon_chr1:142574365
5	Iqgap1									Iqgap1_intron_chr1:142548574	0.0	0.0353	0.0353	NA	1	NA	NA	NA	NA	Iqgap1_intron_chr1:142548574
6	Iqgap1									Iqgap1_intron_chr1:142552644	0.0	0.0173	0.0173	NA	1	NA	NA	NA	NA	Iqgap1_intron_chr1:142552644
7	Iqgap1									Iqgap1_intron_chr1:142573743	0.022	0.0051	-0.017	NA	1	NA	NA	NA	NA	Iqgap1_intron_chr1:142573743
8	Iqgap1									Iqgap1_intron_chr1:142612681	0.0202	0.0022	-0.018	NA	1	NA	NA	NA	NA	Iqgap1_intron_chr1:142612681
1	Wdr73	60.6837	109.3106	0.8378	0.4041	NC	No	No	1	Wdr73_exon_chr1:142712406	1.0	1.0	0.0	NA	2	0.8986	0.9748	0.0762	NA	Wdr73_exon_chr1:142712406
1	Sec11a	702.9654	853.0382	0.2788	0.5138	NC	No	Yes	1	Sec11a_exon_chr1:142733950	1.0	1.0	0.0	NA	2	0.7515	0.4854	-0.2661	Shortening	Sec11a_exon_chr1:142733950
1	Rps17	4997.9654	6192.1495	0.3093	0.2162	NC	No	No	1	Rps17_exon_chr1:143167442	1.0	1.0	0.0	NA	1	NA	NA	NA	NA	Rps17_exon_chr1:143167442
1	RGD1305713	299.5728	336.5762	0.17	0.7044	NC	No	No	1	RGD1305713_exon_chr1:143602681	1.0	1.0	0.0	NA	4	0.7953	0.7867	-0.0085	NA	RGD1305713_exon_chr1:143602681
1	Btbd1	633.6854	685.3272	0.1094	0.7635	NC	No	Yes	2	Btbd1_exon_chr1:143611382	0.9773	0.9565	-0.0208	NA	6	0.5761	0.0512	-0.5249	Shortening	Btbd1_exon_chr1:143611382
2	Btbd1									Btbd1_intron_chr1:143646661	0.0227	0.0435	0.0208	NA	1	NA	NA	NA	NA	Btbd1_intron_chr1:143646661
1	Hdgfl3	799.1237	552.9799	-0.5345	0.13	NC	No	Yes	6	Hdgfl3_exon_chr1:143704872	0.1537	0.261	0.1073	NA	10	0.7879	0.4723	-0.3155	Shortening	Hdgfl3_exon_chr1:143704872
2	Hdgfl3									Hdgfl3_exon_chr1:143712637	0.0028	0.0292	0.0264	NA	1	NA	NA	NA	NA	Hdgfl3_exon_chr1:143712637
3	Hdgfl3									Hdgfl3_exon_chr1:143718310	0.8043	0.664	-0.1403	NA	1	NA	NA	NA	NA	Hdgfl3_exon_chr1:143718310
4	Hdgfl3									Hdgfl3_intron_chr1:143712490	0.0164	0.0033	-0.0131	NA	2	NA	NA	-0.1795	NA	Hdgfl3_intron_chr1:143712490
5	Hdgfl3									Hdgfl3_intron_chr1:143718154	0.0062	0.0267	0.0205	NA	4	NA	NA	0.084	NA	Hdgfl3_intron_chr1:143718154
6	Hdgfl3									Hdgfl3_intron_chr1:143751582	0.0165	0.0158	-0.0008	NA	2	NA	NA	-0.3084	NA	Hdgfl3_intron_chr1:143751582
1	Tlnrd1	185.5938	120.3446	-0.6259	0.3227	NC	No	No	1	Tlnrd1_exon_chr1:146029840	1.0	1.0	0.0	NA	3	0.9842	0.6995	-0.2848	NA	Tlnrd1_exon_chr1:146029840
1	Abhd17c	298.7445	206.9648	-0.5296	0.2051	NC	No	Yes	2	Abhd17c_exon_chr1:146249921	0.9313	0.9426	0.0113	NA	4	0.8968	0.6286	-0.2682	Both	Abhd17c_exon_chr1:146249921
2	Abhd17c									Abhd17c_intron_chr1:146288887	0.0687	0.0574	-0.0113	NA	4	NA	NA	-0.3365	NA	Abhd17c_intron_chr1:146288887
1	Arnt2	65.1145	66.0006	0.0187	1.0	NC	No	No	2	Arnt2_exon_chr1:146403320	0.8481	0.9794	0.1313	NA	6	NA	NA	-0.248	NA	Arnt2_exon_chr1:146403320
2	Arnt2									Arnt2_intron_chr1:146456004	0.1519	0.0163	-0.1356	NA	1	NA	NA	NA	NA	Arnt2_intron_chr1:146456004
1	Fah	26.4013	16.6375	-0.6686	1.0	NC	No	No	1	Fah_exon_chr1:146713846	1.0	1.0	0.0	NA	1	NA	NA	NA	NA	Fah_exon_chr1:146713846
1	Zfand6	127.3127	204.4527	0.6879	0.1337	NC	No	No	3	Zfand6_exon_chr1:146746770	0.8094	0.7375	-0.0718	NA	3	0.9401	0.6977	-0.2423	NA	Zfand6_exon_chr1:146746770
2	Zfand6									Zfand6_exon_chr1:146748766	0.1108	0.2589	0.1482	Up	1	NA	NA	NA	NA	Zfand6_exon_chr1:146748766
3	Zfand6									Zfand6_intron_chr1:146823670	0.0799	0.0035	-0.0764	NA	2	NA	NA	-0.0209	NA	Zfand6_intron_chr1:146823670
1	Tmem135	42.3007	86.6634	1.0281	0.4381	NC	No	No	3	Tmem135_exon_chr1:152888968	0.9244	0.9329	0.0084	NA	5	NA	NA	-0.6858	NA	Tmem135_exon_chr1:152888968
2	Tmem135									Tmem135_intron_chr1:152902903	0.0	0.063	0.063	NA	1	NA	NA	NA	NA	Tmem135_intron_chr1:152902903
3	Tmem135									Tmem135_intron_chr1:152998011	0.0756	0.0041	-0.0714	NA	1	NA	NA	NA	NA	Tmem135_intron_chr1:152998011
1	Prss23	347.0055	530.4805	0.6142	0.1219	NC	No	No	1	Prss23_exon_chr1:153734308	1.0	1.0	0.0	NA	7	0.9763	0.8995	-0.0768	NA	Prss23_exon_chr1:153734308
1	Hikeshi	99.5202	200.063	1.0028	0.0842	UP	No	No	1	Hikeshi_exon_chr1:154147417	1.0	1.0	0.0	NA	3	0.9587	0.9273	-0.0315	NA	Hikeshi_exon_chr1:154147417
1	Eed	251.9548	264.1877	0.0724	0.8569	NC	No	No	3	Eed_exon_chr1:154189650	0.4512	0.6459	0.1947	NA	2	0.1776	0.1005	-0.0771	NA	Eed_exon_chr1:154189650
2	Eed									Eed_exon_chr1:154212681	0.4512	0.2561	-0.1951	NA	1	NA	NA	NA	NA	Eed_exon_chr1:154212681
3	Eed									Eed_intron_chr1:154206314	0.0876	0.098	0.0104	NA	1	NA	NA	NA	NA	Eed_intron_chr1:154206314
1	Crebzf	144.932	107.0208	-0.4319	0.545	NC	No	Yes	1	Crebzf_exon_chr1:156296526	1.0	1.0	0.0	NA	13	0.7867	0.7838	-0.0029	Both	Crebzf_exon_chr1:156296526
1	Sytl2	370.0346	192.4118	-0.9436	0.0108	DOWN	No	No	11	Sytl2_exon_chr1:156335424	0.6327	0.7989	0.1663	NA	3	0.5467	0.4781	-0.0686	NA	Sytl2_exon_chr1:156335424
2	Sytl2									Sytl2_exon_chr1:156342193	0.0198	0.0012	-0.0186	NA	1	NA	NA	NA	NA	Sytl2_exon_chr1:156342193
3	Sytl2									Sytl2_exon_chr1:156367167	0.0165	0.0037	-0.0128	NA	1	NA	NA	NA	NA	Sytl2_exon_chr1:156367167
4	Sytl2									Sytl2_exon_chr1:156371293	0.0158	0.0	-0.0158	NA	1	NA	NA	NA	NA	Sytl2_exon_chr1:156371293
5	Sytl2									Sytl2_exon_chr1:156375437	0.0189	0.0	-0.0189	NA	1	NA	NA	NA	NA	Sytl2_exon_chr1:156375437
6	Sytl2									Sytl2_exon_chr1:156388408	0.0918	0.0687	-0.0231	NA	1	NA	NA	NA	NA	Sytl2_exon_chr1:156388408
7	Sytl2									Sytl2_intron_chr1:156345641	0.0204	0.0338	0.0134	NA	1	NA	NA	NA	NA	Sytl2_intron_chr1:156345641
8	Sytl2									Sytl2_intron_chr1:156357987	0.0313	0.0111	-0.0202	NA	1	NA	NA	NA	NA	Sytl2_intron_chr1:156357987
9	Sytl2									Sytl2_intron_chr1:156361599	0.0583	0.0334	-0.0249	NA	4	NA	NA	-0.6659	NA	Sytl2_intron_chr1:156361599
10	Sytl2									Sytl2_intron_chr1:156397208	0.0309	0.0235	-0.0074	NA	1	NA	NA	NA	NA	Sytl2_intron_chr1:156397208
11	Sytl2									Sytl2_intron_chr1:156439895	0.0635	0.0256	-0.0379	NA	3	NA	NA	-0.2049	NA	Sytl2_intron_chr1:156439895
1	Ankrd42	64.7807	31.7733	-1.0444	0.4587	NC	No	No	2	Ankrd42_exon_chr1:157419496	0.9594	1.0	0.0406	NA	3	0.332	0.3351	0.0032	NA	Ankrd42_exon_chr1:157419496
2	Ankrd42									Ankrd42_intron_chr1:157436723	0.0406	0.0	-0.0406	NA	1	NA	NA	NA	NA	Ankrd42_intron_chr1:157436723
1	Ddias	25.8406	16.5728	-0.6394	1.0	NC	No	No	1	Ddias_exon_chr1:157678528	1.0	1.0	0.0	NA	4	NA	NA	0.0694	NA	Ddias_exon_chr1:157678528
1	Aamdc	10.4177	15.1797	0.5272	1.0	NC	No	No	2	Aamdc_exon_chr1:162519912	0.571	0.8856	0.3146	NA	2	NA	NA	0.2102	NA	Aamdc_exon_chr1:162519912
2	Aamdc									Aamdc_intron_chr1:162549067	0.429	0.1144	-0.3146	NA	2	NA	NA	0.3326	NA	Aamdc_intron_chr1:162549067
1	Capn5	139.1261	78.2699	-0.8274	0.2451	NC	No	No	1	Capn5_exon_chr1:163075430	1.0	1.0	0.0	NA	1	NA	NA	NA	NA	Capn5_exon_chr1:163075430
1	Tsku	94.2539	72.5643	-0.3863	0.7402	NC	No	No	2	Tsku_exon_chr1:163319720	0.9381	1.0	0.0619	NA	3	0.834	0.7216	-0.1124	NA	Tsku_exon_chr1:163319720
2	Tsku									Tsku_intron_chr1:163328457	0.0619	0.0	-0.0619	NA	4	NA	NA	-0.1672	NA	Tsku_intron_chr1:163328457
1	Uvrag	292.4456	184.9484	-0.6654	0.1722	NC	No	No	8	Uvrag_exon_chr1:163866400	0.0	0.0103	0.0103	NA	1	NA	NA	NA	NA	Uvrag_exon_chr1:163866400
2	Uvrag									Uvrag_exon_chr1:163976846	0.6688	0.2918	-0.377	Down	1	NA	NA	NA	NA	Uvrag_exon_chr1:163976846
3	Uvrag									Uvrag_intron_chr1:163901868	0.009	0.0437	0.0347	NA	3	NA	NA	0.7322	NA	Uvrag_intron_chr1:163901868
4	Uvrag									Uvrag_intron_chr1:163938954	0.1352	0.2576	0.1224	NA	4	0.4923	0.5848	0.0925	NA	Uvrag_intron_chr1:163938954
5	Uvrag									Uvrag_intron_chr1:163965000	0.0188	0.0039	-0.0149	NA	1	NA	NA	NA	NA	Uvrag_intron_chr1:163965000
6	Uvrag									Uvrag_intron_chr1:164025517	0.0882	0.0805	-0.0077	NA	5	0.5101	0.4189	-0.0912	NA	Uvrag_intron_chr1:164025517
7	Uvrag									Uvrag_intron_chr1:164046101	0.01	0.0229	0.0129	NA	1	NA	NA	NA	NA	Uvrag_intron_chr1:164046101
8	Uvrag									Uvrag_intron_chr1:164075123	0.07	0.2893	0.2193	NA	1	NA	NA	NA	NA	Uvrag_intron_chr1:164075123
1	Dgat2	58.5241	73.2571	0.3331	0.7563	NC	No	No	2	Dgat2_exon_chr1:164114563	1.0	0.8351	-0.1649	NA	2	0.9177	0.4508	-0.4669	NA	Dgat2_exon_chr1:164114563
2	Dgat2									Dgat2_intron_chr1:164116513	0.0	0.1649	0.1649	NA	1	NA	NA	NA	NA	Dgat2_intron_chr1:164116513
1	Serpinh1	18032.4437	12492.5286	-0.5297	0.0362	NC	No	No	1	Serpinh1_exon_chr1:164301123	1.0	1.0	0.0	NA	1	NA	NA	NA	NA	Serpinh1_exon_chr1:164301123
1	Rps3	7606.3618	9144.1732	0.2657	0.2689	NC	No	No	1	Rps3_exon_chr1:164435939	1.0	1.0	0.0	NA	1	NA	NA	NA	NA	Rps3_exon_chr1:164435939
1	Spcs2	986.5315	1509.4168	0.6127	0.0307	UP	No	Yes	2	Spcs2_exon_chr1:164832352	0.9698	0.9793	0.0095	NA	8	0.1811	0.08	-0.1011	Shortening	Spcs2_exon_chr1:164832352
2	Spcs2									Spcs2_intron_chr1:164838689	0.0302	0.0207	-0.0095	NA	3	NA	NA	-0.143	NA	Spcs2_intron_chr1:164838689
1	Pold3	36.9028	64.3276	0.8127	0.6004	NC	No	No	4	Pold3_exon_chr1:165085573	0.5411	0.5906	0.0496	NA	2	NA	NA	-0.0409	NA	Pold3_exon_chr1:165085573
2	Pold3									Pold3_exon_chr1:165089750	0.1743	0.3411	0.1668	NA	1	NA	NA	NA	NA	Pold3_exon_chr1:165089750
3	Pold3									Pold3_exon_chr1:165094426	0.1898	0.0111	-0.1787	NA	1	NA	NA	NA	NA	Pold3_exon_chr1:165094426
4	Pold3									Pold3_exon_chr1:165097572	0.0949	0.0572	-0.0377	NA	1	NA	NA	NA	NA	Pold3_exon_chr1:165097572
1	LOC100912071	37.0932	4.4811	-3.0949	0.5743	NC	No	No	2	LOC100912071_exon_chr1:165184323	0.9182	0.9167	-0.0016	NA	2	NA	NA	-0.5381	NA	LOC100912071_exon_chr1:165184323
2	LOC100912071									LOC100912071_intron_chr1:165237372	0.0818	0.0833	0.0016	NA	5	NA	NA	NA	NA	LOC100912071_intron_chr1:165237372
1	Ppme1	127.2199	237.0295	0.8864	0.0387	UP	No	Yes	6	Ppme1_exon_chr1:165336390	0.8143	0.8971	0.0828	NA	4	0.8452	0.7719	-0.0733	Both	Ppme1_exon_chr1:165336390
2	Ppme1									Ppme1_exon_chr1:165346958	0.0237	0.003	-0.0207	NA	1	NA	NA	NA	NA	Ppme1_exon_chr1:165346958
3	Ppme1									Ppme1_intron_chr1:165354260	0.0711	0.0	-0.0711	NA	1	NA	NA	NA	NA	Ppme1_intron_chr1:165354260
4	Ppme1									Ppme1_intron_chr1:165357982	0.0046	0.0695	0.0649	NA	1	NA	NA	NA	NA	Ppme1_intron_chr1:165357982
5	Ppme1									Ppme1_intron_chr1:165366950	0.0245	0.0304	0.0059	NA	1	NA	NA	NA	NA	Ppme1_intron_chr1:165366950
6	Ppme1									Ppme1_intron_chr1:165381970	0.0619	0.0	-0.0619	NA	3	NA	NA	-0.3334	NA	Ppme1_intron_chr1:165381970
1	Dnajb13	2.0106	0.0	-3.6383	1.0	NC	No	No	1	Dnajb13_exon_chr1:165517175	1.0	1.0	0.0	NA	1	NA	NA	NA	NA	Dnajb13_exon_chr1:165517175
1	Mrpl48	379.0189	291.6852	-0.3807	0.4179	NC	No	No	3	Mrpl48_exon_chr1:165564435	0.4459	0.5759	0.13	NA	1	NA	NA	NA	NA	Mrpl48_exon_chr1:165564435
2	Mrpl48									Mrpl48_intron_chr1:165588316	0.5384	0.4108	-0.1276	NA	1	NA	NA	NA	NA	Mrpl48_intron_chr1:165588316
3	Mrpl48									Mrpl48_intron_chr1:165594672	0.0042	0.0096	0.0054	NA	1	NA	NA	NA	NA	Mrpl48_intron_chr1:165594672
1	Relt	63.1969	42.1434	-0.5866	0.6519	NC	No	No	2	Relt_exon_chr1:165885869	0.9384	1.0	0.0616	NA	3	0.3502	0.0955	-0.2547	NA	Relt_exon_chr1:165885869
2	Relt									Relt_exon_chr1:165887484	0.0616	0.0	-0.0616	NA	1	NA	NA	NA	NA	Relt_exon_chr1:165887484
1	Inppl1	763.4287	444.0218	-0.7777	0.0019	DOWN	No	No	1	Inppl1_exon_chr1:166899032	1.0	1.0	0.0	NA	2	0.9043	0.8807	-0.0236	NA	Inppl1_exon_chr1:166899032
1	Lrrc51	10.299	14.5899	0.5119	1.0	NC	No	No	1	Lrrc51_exon_chr1:166998201	1.0	1.0	0.0	NA	1	NA	NA	NA	NA	Lrrc51_exon_chr1:166998201
1	Il18bp	16.6416	16.546	-0.0021	1.0	NC	No	No	1	Il18bp_exon_chr1:167091764	1.0	1.0	0.0	NA	1	NA	NA	NA	NA	Il18bp_exon_chr1:167091764
1	Rnf121	122.2603	158.5079	0.3775	0.6863	NC	No	No	1	Rnf121_exon_chr1:167096274	1.0	1.0	0.0	NA	1	NA	NA	NA	NA	Rnf121_exon_chr1:167096274
1	Nup98	198.2889	130.6407	-0.6017	0.186	NC	No	Yes	3	Nup98_exon_chr1:167215047	0.7949	0.8874	0.0925	NA	3	0.9165	0.8667	-0.0498	Shortening	Nup98_exon_chr1:167215047
2	Nup98									Nup98_intron_chr1:167246398	0.1952	0.0345	-0.1607	Down	5	NA	NA	-0.5669	Both	Nup98_intron_chr1:167246398
3	Nup98									Nup98_intron_chr1:167308699	0.0099	0.0758	0.066	NA	3	NA	NA	0.0402	NA	Nup98_intron_chr1:167308699
1	Rhog	169.9658	204.8439	0.2738	0.5374	NC	No	No	1	Rhog_exon_chr1:167337343	1.0	1.0	0.0	NA	1	NA	NA	NA	NA	Rhog_exon_chr1:167337343
1	Trim5	64.2452	100.1023	0.6354	0.2872	NC	No	No	4	Trim5_exon_chr1:169448222	0.6076	0.7856	0.178	Up	3	1.0	0.9044	-0.0956	NA	Trim5_exon_chr1:169448222
2	Trim5									Trim5_exon_chr1:169452733	0.0878	0.0036	-0.0842	NA	3	NA	NA	0.0952	NA	Trim5_exon_chr1:169452733
3	Trim5									Trim5_exon_chr1:169454336	0.078	0.0514	-0.0266	NA	2	NA	NA	-0.3606	NA	Trim5_exon_chr1:169454336
4	Trim5									Trim5_intron_chr1:169452502	0.2266	0.1595	-0.0671	NA	1	NA	NA	NA	NA	Trim5_intron_chr1:169452502
1	Fam160a2	157.2437	166.8266	0.0841	0.8661	NC	No	No	3	Fam160a2_exon_chr1:170217024	0.8952	0.9295	0.0343	NA	1	NA	NA	NA	NA	Fam160a2_exon_chr1:170217024
2	Fam160a2									Fam160a2_intron_chr1:170218955	0.0322	0.0167	-0.0155	NA	1	NA	NA	NA	NA	Fam160a2_intron_chr1:170218955
3	Fam160a2									Fam160a2_intron_chr1:170238773	0.0726	0.0538	-0.0188	NA	2	NA	NA	0.5832	NA	Fam160a2_intron_chr1:170238773
1	Cavin3	1124.1851	1461.893	0.3815	0.3185	NC	No	No	1	Cavin3_exon_chr1:170317722	1.0	1.0	0.0	NA	5	0.9213	0.9106	-0.0107	NA	Cavin3_exon_chr1:170317722
1	Apbb1	64.5709	117.3075	0.8718	0.2365	NC	No	No	1	Apbb1_exon_chr1:170388198	1.0	1.0	0.0	NA	1	NA	NA	NA	NA	Apbb1_exon_chr1:170388198
1	Trim3	266.6152	242.7876	-0.1408	0.823	NC	No	No	2	Trim3_exon_chr1:170442223	0.9104	0.8129	-0.0975	NA	1	NA	NA	NA	NA	Trim3_exon_chr1:170442223
2	Trim3									Trim3_intron_chr1:170443828	0.0896	0.1859	0.0963	NA	1	NA	NA	NA	NA	Trim3_intron_chr1:170443828
1	Arfip2	192.6133	149.2953	-0.3713	0.4261	NC	No	No	2	Arfip2_exon_chr1:170467160	0.9894	1.0	0.0106	NA	1	NA	NA	NA	NA	Arfip2_exon_chr1:170467160
2	Arfip2									Arfip2_intron_chr1:170470076	0.0106	0.0	-0.0106	NA	1	NA	NA	NA	NA	Arfip2_intron_chr1:170470076
1	Rrp8	39.4729	15.5213	-1.348	1.0	NC	No	No	2	Rrp8_exon_chr1:170575428	0.0	0.6843	0.6843	NA	3	NA	NA	0.4819	NA	Rrp8_exon_chr1:170575428
2	Rrp8									Rrp8_exon_chr1:170577307	1.0	0.3157	-0.6843	NA	2	NA	NA	-0.342	NA	Rrp8_exon_chr1:170577307
1	Taf10	506.7572	515.5071	0.0272	0.8976	NC	No	No	1	Taf10_exon_chr1:170585329	1.0	1.0	0.0	NA	5	0.3456	0.3304	-0.0152	NA	Taf10_exon_chr1:170585329
1	Tpp1	217.6398	307.9652	0.4995	0.3512	NC	No	No	2	Tpp1_exon_chr1:170588939	0.9792	1.0	0.0208	NA	1	NA	NA	NA	NA	Tpp1_exon_chr1:170588939
2	Tpp1									Tpp1_intron_chr1:170593540	0.0115	0.0	-0.0115	NA	1	NA	NA	NA	NA	Tpp1_intron_chr1:170593540
1	Mrpl17	153.7687	442.8147	1.5269	0.0	UP	No	No	1	Mrpl17_exon_chr1:170653141	1.0	1.0	0.0	NA	4	0.931	0.9452	0.0142	NA	Mrpl17_exon_chr1:170653141
1	Dennd2b	680.0021	796.025	0.2271	0.5489	NC	No	No	7	Dennd2b_exon_chr1:174137839	0.7533	0.7187	-0.0346	NA	2	0.9849	0.941	-0.0439	NA	Dennd2b_exon_chr1:174137839
2	Dennd2b									Dennd2b_exon_chr1:174174250	0.0	0.0129	0.0129	NA	1	NA	NA	NA	NA	Dennd2b_exon_chr1:174174250
3	Dennd2b									Dennd2b_intron_chr1:174148023	0.0142	0.0077	-0.0065	NA	5	NA	NA	-0.4483	NA	Dennd2b_intron_chr1:174148023
4	Dennd2b									Dennd2b_intron_chr1:174172999	0.0335	0.0519	0.0185	NA	4	0.2242	0.2725	0.0484	NA	Dennd2b_intron_chr1:174172999
5	Dennd2b									Dennd2b_intron_chr1:174187623	0.0164	0.0134	-0.0029	NA	4	NA	NA	0.3205	NA	Dennd2b_intron_chr1:174187623
6	Dennd2b									Dennd2b_intron_chr1:174234318	0.1629	0.1763	0.0135	NA	9	0.8272	0.9499	0.1227	NA	Dennd2b_intron_chr1:174234318
7	Dennd2b									Dennd2b_intron_chr1:174289458	0.0153	0.0155	0.0002	NA	5	NA	NA	-0.1408	NA	Dennd2b_intron_chr1:174289458
1	Ascl3	3.0159	1.1384	-1.4284	1.0	NC	No	No	1	Ascl3_exon_chr1:174352058	1.0	1.0	0.0	NA	1	NA	NA	NA	NA	Ascl3_exon_chr1:174352058
1	Tmem9b	73.5671	264.4309	1.842	0.0	UP	No	No	1	Tmem9b_exon_chr1:174362128	1.0	1.0	0.0	NA	5	0.7001	0.6958	-0.0043	NA	Tmem9b_exon_chr1:174362128
1	Nrip3	12.1522	7.8476	-0.6295	1.0	NC	No	No	1	Nrip3_exon_chr1:174388499	1.0	1.0	0.0	NA	3	NA	NA	-0.2851	NA	Nrip3_exon_chr1:174388499
1	Dennd5a	244.1949	171.1	-0.5203	0.2177	NC	No	Yes	3	Dennd5a_exon_chr1:174525054	0.9504	0.952	0.0016	NA	4	0.6724	0.799	0.1266	Lengthening	Dennd5a_exon_chr1:174525054
2	Dennd5a									Dennd5a_intron_chr1:174547380	0.034	0.0203	-0.0136	NA	1	NA	NA	NA	NA	Dennd5a_intron_chr1:174547380
3	Dennd5a									Dennd5a_intron_chr1:174562330	0.0136	0.0192	0.0057	NA	1	NA	NA	NA	NA	Dennd5a_intron_chr1:174562330
1	Tmem41b	76.1451	253.513	1.7345	0.0005	UP	No	Yes	1	Tmem41b_exon_chr1:174607362	1.0	1.0	0.0	NA	4	0.3535	0.126	-0.2275	Shortening	Tmem41b_exon_chr1:174607362
1	Sbf2	49.5341	80.2616	0.6917	0.5261	NC	No	No	9	Sbf2_exon_chr1:174949825	0.0	0.088	0.088	NA	1	NA	NA	NA	NA	Sbf2_exon_chr1:174949825
2	Sbf2									Sbf2_exon_chr1:175215404	0.1332	0.0294	-0.1038	NA	1	NA	NA	NA	NA	Sbf2_exon_chr1:175215404
3	Sbf2									Sbf2_intron_chr1:174981124	0.1953	0.2403	0.045	NA	1	NA	NA	NA	NA	Sbf2_intron_chr1:174981124
4	Sbf2									Sbf2_intron_chr1:175008991	0.0	0.0554	0.0554	NA	1	NA	NA	NA	NA	Sbf2_intron_chr1:175008991
5	Sbf2									Sbf2_intron_chr1:175171302	0.3385	0.1635	-0.175	NA	6	NA	NA	0.0059	NA	Sbf2_intron_chr1:175171302
6	Sbf2									Sbf2_intron_chr1:175200413	0.1836	0.0819	-0.1017	NA	6	NA	NA	0.3143	NA	Sbf2_intron_chr1:175200413
7	Sbf2									Sbf2_intron_chr1:175252581	0.1393	0.2342	0.095	NA	1	NA	NA	NA	NA	Sbf2_intron_chr1:175252581
8	Sbf2									Sbf2_intron_chr1:175364051	0.0101	0.0222	0.0121	NA	1	NA	NA	NA	NA	Sbf2_intron_chr1:175364051
9	Sbf2									Sbf2_intron_chr1:175419963	0.0	0.0777	0.0777	NA	3	NA	NA	0.1112	NA	Sbf2_intron_chr1:175419963
1	rnf141	41.5889	311.3576	2.9059	0.0001	UP	No	No	4	rnf141_exon_chr1:175634870	0.8185	0.9844	0.166	Up	1	NA	NA	NA	NA	rnf141_exon_chr1:175634870
2	rnf141									rnf141_intron_chr1:175640359	0.0484	0.0076	-0.0408	NA	1	NA	NA	NA	NA	rnf141_intron_chr1:175640359
3	rnf141									rnf141_intron_chr1:175646899	0.028	0.0057	-0.0223	NA	2	NA	NA	NA	NA	rnf141_intron_chr1:175646899
4	rnf141									rnf141_intron_chr1:175650529	0.1051	0.0023	-0.1028	NA	1	NA	NA	NA	NA	rnf141_intron_chr1:175650529
1	Mrvi1	71.1621	57.7237	-0.3071	0.8194	NC	No	No	6	Mrvi1_exon_chr1:175685285	0.4818	0.6227	0.1409	NA	5	0.7355	0.3206	-0.4149	NA	Mrvi1_exon_chr1:175685285
2	Mrvi1									Mrvi1_exon_chr1:175738779	0.2145	0.175	-0.0395	NA	1	NA	NA	NA	NA	Mrvi1_exon_chr1:175738779
3	Mrvi1									Mrvi1_intron_chr1:175711119	0.1322	0.0684	-0.0638	NA	3	NA	NA	-0.4845	NA	Mrvi1_intron_chr1:175711119
4	Mrvi1									Mrvi1_intron_chr1:175744091	0.0	0.01	0.01	NA	1	NA	NA	NA	NA	Mrvi1_intron_chr1:175744091
5	Mrvi1									Mrvi1_intron_chr1:175761949	0.074	0.0236	-0.0504	NA	1	NA	NA	NA	NA	Mrvi1_intron_chr1:175761949
6	Mrvi1									Mrvi1_intron_chr1:175795597	0.0974	0.094	-0.0034	NA	2	NA	NA	0.1878	NA	Mrvi1_intron_chr1:175795597
1	Eif4g2	2048.1371	2268.9804	0.1483	0.6333	NC	No	Yes	2	Eif4g2_exon_chr1:175885394	0.961	0.992	0.0309	NA	9	0.5692	0.3932	-0.1761	Both	Eif4g2_exon_chr1:175885394
2	Eif4g2									Eif4g2_exon_chr1:175892909	0.0278	0.0037	-0.0241	NA	1	NA	NA	NA	NA	Eif4g2_exon_chr1:175892909
1	Btbd10	204.189	265.5578	0.379	0.4622	NC	No	No	3	Btbd10_exon_chr1:178139646	0.7915	0.9255	0.134	NA	3	0.4634	0.5252	0.0618	NA	Btbd10_exon_chr1:178139646
2	Btbd10									Btbd10_intron_chr1:178145844	0.0038	0.0171	0.0132	NA	1	NA	NA	NA	NA	Btbd10_intron_chr1:178145844
3	Btbd10									Btbd10_intron_chr1:178195865	0.2047	0.0575	-0.1472	NA	8	NA	NA	-0.1187	NA	Btbd10_intron_chr1:178195865
1	Rras2	472.6061	681.8491	0.5277	0.1622	NC	No	Yes	3	Rras2_exon_chr1:178941981	0.8709	0.9039	0.033	NA	9	0.6321	0.4627	-0.1693	Both	Rras2_exon_chr1:178941981
2	Rras2									Rras2_intron_chr1:178953395	0.0171	0.001	-0.016	NA	1	NA	NA	NA	NA	Rras2_intron_chr1:178953395
3	Rras2									Rras2_intron_chr1:179009886	0.1121	0.0883	-0.0238	NA	7	0.8141	0.8378	0.0238	NA	Rras2_intron_chr1:179009886
1	Copb1	524.7194	525.5632	0.001	0.9371	NC	No	No	4	Copb1_exon_chr1:183695853	0.5665	0.6525	0.086	NA	1	NA	NA	NA	NA	Copb1_exon_chr1:183695853
2	Copb1									Copb1_exon_chr1:183703697	0.0112	0.0481	0.0369	NA	1	NA	NA	NA	NA	Copb1_exon_chr1:183703697
3	Copb1									Copb1_exon_chr1:183707830	0.413	0.2868	-0.1262	NA	1	NA	NA	NA	NA	Copb1_exon_chr1:183707830
4	Copb1									Copb1_intron_chr1:183698041	0.0	0.0125	0.0125	NA	1	NA	NA	NA	NA	Copb1_intron_chr1:183698041
1	Psma1	631.3143	831.9909	0.4027	0.1661	NC	No	No	1	Psma1_exon_chr1:183733917	1.0	1.0	0.0	NA	1	NA	NA	NA	NA	Psma1_exon_chr1:183733917
1	Nucb2	337.594	436.1001	0.3721	0.2552	NC	No	No	7	Nucb2_exon_chr1:185106921	0.258	0.4758	0.2177	Up	1	NA	NA	NA	NA	Nucb2_exon_chr1:185106921
2	Nucb2									Nucb2_exon_chr1:185113659	0.0531	0.0215	-0.0316	NA	1	NA	NA	NA	NA	Nucb2_exon_chr1:185113659
3	Nucb2									Nucb2_exon_chr1:185117895	0.0402	0.0226	-0.0176	NA	1	NA	NA	NA	NA	Nucb2_exon_chr1:185117895
4	Nucb2									Nucb2_exon_chr1:185119234	0.6178	0.456	-0.1618	NA	1	NA	NA	NA	NA	Nucb2_exon_chr1:185119234
5	Nucb2									Nucb2_intron_chr1:185107340	0.0145	0.0016	-0.0128	NA	1	NA	NA	NA	NA	Nucb2_intron_chr1:185107340
6	Nucb2									Nucb2_intron_chr1:185113569	0.0	0.0097	0.0097	NA	1	NA	NA	NA	NA	Nucb2_intron_chr1:185113569
7	Nucb2									Nucb2_intron_chr1:185119048	0.0119	0.0008	-0.0111	NA	1	NA	NA	NA	NA	Nucb2_intron_chr1:185119048
1	RGD1311703	422.3568	498.6171	0.2409	0.5151	NC	Yes	Yes	4	RGD1311703_exon_chr1:185559037	0.3957	0.6334	0.2376	Up	5	0.6743	0.3989	-0.2754	Both	RGD1311703_exon_chr1:185559037
2	RGD1311703									RGD1311703_exon_chr1:185560037	0.4804	0.1551	-0.3253	NA	1	NA	NA	NA	NA	RGD1311703_exon_chr1:185560037
3	RGD1311703									RGD1311703_exon_chr1:185561213	0.0133	0.0429	0.0296	NA	1	NA	NA	NA	NA	RGD1311703_exon_chr1:185561213
4	RGD1311703									RGD1311703_exon_chr1:185563549	0.1105	0.1686	0.0581	NA	2	0.2157	0.2062	-0.0095	NA	RGD1311703_exon_chr1:185563549
1	Rps15a	22770.9783	14434.5458	-0.6577	0.0137	DOWN	No	No	1	Rps15a_exon_chr1:187759994	1.0	1.0	0.0	NA	1	NA	NA	NA	NA	Rps15a_exon_chr1:187759994
1	Arl6ip1	393.6775	510.5435	0.38	0.4149	NC	No	Yes	2	Arl6ip1_exon_chr1:187771727	0.9803	1.0	0.0197	NA	4	0.9389	0.5921	-0.3469	Shortening	Arl6ip1_exon_chr1:187771727
2	Arl6ip1									Arl6ip1_intron_chr1:187776952	0.0123	0.0	-0.0123	NA	1	NA	NA	NA	NA	Arl6ip1_intron_chr1:187776952
1	Itpripl2	14.4842	99.1851	2.7835	0.5691	NC	No	No	1	Itpripl2_exon_chr1:188142748	1.0	1.0	0.0	NA	1	NA	NA	NA	NA	Itpripl2_exon_chr1:188142748
1	Coq7	72.2146	34.248	-1.0794	0.1555	NC	No	No	1	Coq7_exon_chr1:188176293	1.0	1.0	0.0	NA	1	NA	NA	NA	NA	Coq7_exon_chr1:188176293
1	Knop1	1070.5358	490.1555	-1.1295	0.0018	DOWN	No	No	4	Knop1_exon_chr1:188368630	0.0292	0.0364	0.0072	NA	1	NA	NA	NA	NA	Knop1_exon_chr1:188368630
2	Knop1									Knop1_exon_chr1:188371255	0.0989	0.1508	0.0519	NA	4	0.3681	0.1898	-0.1783	NA	Knop1_exon_chr1:188371255
3	Knop1									Knop1_exon_chr1:188567013	0.0069	0.0096	0.0026	NA	1	NA	NA	NA	NA	Knop1_exon_chr1:188567013
4	Knop1									Knop1_exon_chr1:188569638	0.865	0.8032	-0.0617	NA	5	0.5883	0.5129	-0.0754	NA	Knop1_exon_chr1:188569638
1	Gprc5b	40.096	33.8746	-0.2435	1.0	NC	No	No	3	Gprc5b_exon_chr1:188689958	0.8295	0.574	-0.2555	NA	1	NA	NA	NA	NA	Gprc5b_exon_chr1:188689958
2	Gprc5b									Gprc5b_intron_chr1:188693700	0.0701	0.3962	0.3261	NA	2	NA	NA	0.0082	NA	Gprc5b_intron_chr1:188693700
3	Gprc5b									Gprc5b_intron_chr1:188713136	0.1005	0.0299	-0.0706	NA	1	NA	NA	NA	NA	Gprc5b_intron_chr1:188713136
1	Thumpd1	168.4146	166.9865	-0.0147	0.9206	NC	No	Yes	2	Thumpd1_exon_chr1:189459595	0.4791	0.7541	0.275	NA	3	0.8804	0.9913	0.1108	Lengthening	Thumpd1_exon_chr1:189459595
2	Thumpd1									Thumpd1_exon_chr1:190369166	0.5192	0.2459	-0.2733	NA	1	NA	NA	NA	NA	Thumpd1_exon_chr1:190369166
1	Eri2	23.0208	28.999	0.3359	1.0	NC	No	No	1	Eri2_exon_chr1:189542863	1.0	1.0	0.0	NA	4	0.6141	0.5592	-0.055	NA	Eri2_exon_chr1:189542863
1	Dcun1d3	19.1378	52.0978	1.4175	1.0	NC	No	No	2	Dcun1d3_exon_chr1:189628700	0.2236	0.7275	0.5039	NA	2	NA	NA	0.6247	NA	Dcun1d3_exon_chr1:189628700
2	Dcun1d3									Dcun1d3_intron_chr1:189666233	0.7764	0.2725	-0.5039	NA	6	NA	NA	-0.3335	NA	Dcun1d3_intron_chr1:189666233
1	Cdr2	59.1952	105.7794	0.8447	0.1083	NC	No	No	2	Cdr2_exon_chr1:190891467	0.8815	0.9577	0.0762	NA	2	0.9332	0.9255	-0.0078	NA	Cdr2_exon_chr1:190891467
2	Cdr2									Cdr2_intron_chr1:190901312	0.1185	0.0423	-0.0762	NA	2	NA	NA	-0.3333	NA	Cdr2_intron_chr1:190901312
1	Usp31	13.4251	34.4849	1.337	1.0	NC	No	No	3	Usp31_exon_chr1:191618311	0.7465	0.8596	0.1131	NA	4	NA	NA	0.0817	NA	Usp31_exon_chr1:191618311
2	Usp31									Usp31_intron_chr1:191620032	0.0362	0.13	0.0938	NA	3	NA	NA	0.0012	NA	Usp31_intron_chr1:191620032
3	Usp31									Usp31_intron_chr1:191635361	0.2173	0.0104	-0.2069	NA	1	NA	NA	NA	NA	Usp31_intron_chr1:191635361
1	Cog7	25.0789	24.7106	-0.0023	1.0	NC	No	No	1	Cog7_exon_chr1:191889864	1.0	1.0	0.0	NA	1	NA	NA	NA	NA	Cog7_exon_chr1:191889864
1	Gga2	721.2702	498.3939	-0.5354	0.1154	NC	No	No	1	Gga2_exon_chr1:191952610	1.0	1.0	0.0	NA	1	NA	NA	NA	NA	Gga2_exon_chr1:191952610
1	Ears2	11.449	17.276	0.5537	1.0	NC	No	No	4	Ears2_exon_chr1:191997941	0.5776	0.4669	-0.1106	NA	2	NA	NA	0.0234	NA	Ears2_exon_chr1:191997941
2	Ears2									Ears2_intron_chr1:192003678	0.0	0.1109	0.1109	NA	1	NA	NA	NA	NA	Ears2_intron_chr1:192003678
3	Ears2									Ears2_intron_chr1:192006399	0.4224	0.0416	-0.3808	NA	1	NA	NA	NA	NA	Ears2_intron_chr1:192006399
4	Ears2									Ears2_intron_chr1:192021090	0.0	0.3806	0.3806	NA	1	NA	NA	NA	NA	Ears2_intron_chr1:192021090
1	Ndufab1	895.819	1002.8808	0.1643	0.7009	NC	No	No	2	Ndufab1_exon_chr1:192046271	0.0132	0.0066	-0.0066	NA	4	NA	NA	-0.4324	NA	Ndufab1_exon_chr1:192046271
2	Ndufab1									Ndufab1_intron_chr1:192048672	0.9868	0.9934	0.0066	NA	4	0.993	0.9877	-0.0052	NA	Ndufab1_intron_chr1:192048672
1	Palb2	15.6254	4.174	-1.9352	1.0	NC	No	No	2	Palb2_exon_chr1:192065036	0.8328	1.0	0.1672	NA	1	NA	NA	NA	NA	Palb2_exon_chr1:192065036
2	Palb2									Palb2_intron_chr1:192073347	0.1672	0.0	-0.1672	NA	1	NA	NA	NA	NA	Palb2_intron_chr1:192073347
1	Arhgap17	74.0395	98.3813	0.4151	0.6994	NC	No	No	2	Arhgap17_exon_chr1:193239872	1.0	0.9316	-0.0684	NA	3	0.9872	0.8947	-0.0925	NA	Arhgap17_exon_chr1:193239872
2	Arhgap17									Arhgap17_intron_chr1:193251439	0.0	0.0611	0.0611	NA	1	NA	NA	NA	NA	Arhgap17_intron_chr1:193251439
1	Nupr1	7341.9859	8615.0013	0.2306	0.7797	NC	No	No	2	Nupr1_exon_chr1:194767766	0.5023	0.5043	0.002	NA	1	NA	NA	NA	NA	Nupr1_exon_chr1:194767766
2	Nupr1									Nupr1_exon_chr1:198043399	0.4977	0.4957	-0.002	NA	1	NA	NA	NA	NA	Nupr1_exon_chr1:198043399
1	Snurf	40.4068	62.1291	0.6019	0.5984	NC	No	No	2	Snurf_exon_chr1:195074491	0.8346	0.9943	0.1597	NA	1	NA	NA	NA	NA	Snurf_exon_chr1:195074491
2	Snurf									Snurf_intron_chr1:195087462	0.1654	0.0057	-0.1597	NA	1	NA	NA	NA	NA	Snurf_intron_chr1:195087462
1	Nsmce1	103.0555	127.614	0.3046	0.7454	NC	No	No	3	Nsmce1_exon_chr1:196857688	0.9235	1.0	0.0765	NA	2	0.4002	0.3744	-0.0258	NA	Nsmce1_exon_chr1:196857688
2	Nsmce1									Nsmce1_exon_chr1:196863566	0.0341	0.0	-0.0341	NA	1	NA	NA	NA	NA	Nsmce1_exon_chr1:196863566
3	Nsmce1									Nsmce1_intron_chr1:196878730	0.0424	0.0	-0.0424	NA	1	NA	NA	NA	NA	Nsmce1_intron_chr1:196878730
1	Gtf3c1	291.8493	244.3266	-0.2527	0.5826	NC	No	No	6	Gtf3c1_exon_chr1:197033244	0.7797	0.8142	0.0346	NA	1	NA	NA	NA	NA	Gtf3c1_exon_chr1:197033244
2	Gtf3c1									Gtf3c1_exon_chr1:197049871	0.0942	0.0135	-0.0807	NA	1	NA	NA	NA	NA	Gtf3c1_exon_chr1:197049871
3	Gtf3c1									Gtf3c1_exon_chr1:197053491	0.0636	0.0	-0.0636	NA	1	NA	NA	NA	NA	Gtf3c1_exon_chr1:197053491
4	Gtf3c1									Gtf3c1_intron_chr1:197058755	0.0234	0.0	-0.0234	NA	1	NA	NA	NA	NA	Gtf3c1_intron_chr1:197058755
5	Gtf3c1									Gtf3c1_intron_chr1:197084637	0.0184	0.0485	0.0301	NA	1	NA	NA	NA	NA	Gtf3c1_intron_chr1:197084637
6	Gtf3c1									Gtf3c1_intron_chr1:197088147	0.0121	0.1237	0.1116	NA	1	NA	NA	NA	NA	Gtf3c1_intron_chr1:197088147
1	Xpo6	145.9478	241.6992	0.733	0.1313	NC	No	No	6	Xpo6_exon_chr1:197501149	0.7143	0.775	0.0607	NA	1	NA	NA	NA	NA	Xpo6_exon_chr1:197501149
2	Xpo6									Xpo6_intron_chr1:197513720	0.008	0.0415	0.0335	NA	2	NA	NA	0.336	NA	Xpo6_intron_chr1:197513720
3	Xpo6									Xpo6_intron_chr1:197518438	0.0555	0.0579	0.0024	NA	3	NA	NA	0.3342	NA	Xpo6_intron_chr1:197518438
4	Xpo6									Xpo6_intron_chr1:197522678	0.1297	0.0783	-0.0514	NA	1	NA	NA	NA	NA	Xpo6_intron_chr1:197522678
5	Xpo6									Xpo6_intron_chr1:197545741	0.0765	0.0083	-0.0682	NA	1	NA	NA	NA	NA	Xpo6_intron_chr1:197545741
6	Xpo6									Xpo6_intron_chr1:197549407	0.016	0.0389	0.0229	NA	1	NA	NA	NA	NA	Xpo6_intron_chr1:197549407
1	Spns1	385.0075	213.1272	-0.8571	0.0215	DOWN	No	No	1	Spns1_exon_chr1:197771542	1.0	1.0	0.0	NA	1	NA	NA	NA	NA	Spns1_exon_chr1:197771542
1	Atp2a1	120.2431	96.065	-0.3344	0.794	NC	No	No	1	Atp2a1_exon_chr1:197856181	1.0	1.0	0.0	NA	1	NA	NA	NA	NA	Atp2a1_exon_chr1:197856181
1	Sh2b1	723.163	379.0813	-0.937	0.017	DOWN	No	No	1	Sh2b1_exon_chr1:197879619	1.0	1.0	0.0	NA	1	NA	NA	NA	NA	Sh2b1_exon_chr1:197879619
1	Eif3c	4764.9815	4209.6565	-0.1789	0.491	NC	No	No	4	Eif3c_exon_chr1:197964578	0.1597	0.401	0.2412	Up	1	NA	NA	NA	NA	Eif3c_exon_chr1:197964578
2	Eif3c									Eif3c_exon_chr1:197976156	0.3262	0.1434	-0.1828	Down	1	NA	NA	NA	NA	Eif3c_exon_chr1:197976156
3	Eif3c									Eif3c_exon_chr1:197978547	0.1918	0.1832	-0.0087	NA	1	NA	NA	NA	NA	Eif3c_exon_chr1:197978547
4	Eif3c									Eif3c_exon_chr1:197979643	0.3187	0.27	-0.0487	NA	1	NA	NA	NA	NA	Eif3c_exon_chr1:197979643
1	Cln3	7.1969	3.0416	-1.309	1.0	NC	No	No	2	Cln3_exon_chr1:197986705	0.5563	0.5198	-0.0365	NA	1	NA	NA	NA	NA	Cln3_exon_chr1:197986705
2	Cln3									Cln3_intron_chr1:197994634	0.4437	0.4802	0.0365	NA	1	NA	NA	NA	NA	Cln3_intron_chr1:197994634
1	Slx1b	7.2011	31.363	2.1049	0.8657	NC	No	No	2	Slx1b_exon_chr1:198116399	1.0	0.6932	-0.3068	NA	1	NA	NA	NA	NA	Slx1b_exon_chr1:198116399
2	Slx1b									Slx1b_intron_chr1:198119747	0.0	0.3068	0.3068	Up	4	NA	NA	0.5598	NA	Slx1b_intron_chr1:198119747
1	Aldoa	3159.5115	3962.203	0.3277	0.376	NC	No	No	1	Aldoa_exon_chr1:198228665	1.0	1.0	0.0	NA	1	NA	NA	NA	NA	Aldoa_exon_chr1:198228665
1	Ino80e	105.8817	177.0881	0.7353	0.1365	NC	No	Yes	2	Ino80e_exon_chr1:198288898	0.9725	0.992	0.0195	NA	2	0.4358	0.2524	-0.1834	Shortening	Ino80e_exon_chr1:198288898
2	Ino80e									Ino80e_exon_chr1:198298076	0.0275	0.008	-0.0195	NA	1	NA	NA	NA	NA	Ino80e_exon_chr1:198298076
1	Taok2	93.2789	35.2987	-1.4188	0.0212	DOWN	No	No	4	Taok2_exon_chr1:198307761	0.1795	0.2584	0.0789	NA	2	NA	NA	0.2239	NA	Taok2_exon_chr1:198307761
2	Taok2									Taok2_exon_chr1:198310975	0.4207	0.4456	0.025	NA	1	NA	NA	NA	NA	Taok2_exon_chr1:198310975
3	Taok2									Taok2_exon_chr1:198311284	0.2037	0.048	-0.1557	NA	1	NA	NA	NA	NA	Taok2_exon_chr1:198311284
4	Taok2									Taok2_exon_chr1:198316573	0.1961	0.2479	0.0518	NA	1	NA	NA	NA	NA	Taok2_exon_chr1:198316573
1	Mvp	368.137	321.2961	-0.1966	0.6116	NC	No	No	1	Mvp_exon_chr1:198421062	1.0	1.0	0.0	NA	1	NA	NA	NA	NA	Mvp_exon_chr1:198421062
1	Pagr1	27.3377	37.9309	0.4795	0.6894	NC	No	No	1	Pagr1_exon_chr1:198449239	1.0	1.0	0.0	NA	1	NA	NA	NA	NA	Pagr1_exon_chr1:198449239
1	Kif22	170.6171	282.3323	0.7279	0.1835	NC	No	No	2	Kif22_exon_chr1:198461532	0.7948	0.8753	0.0806	NA	1	NA	NA	NA	NA	Kif22_exon_chr1:198461532
2	Kif22									Kif22_exon_chr1:198463170	0.2052	0.1247	-0.0806	NA	1	NA	NA	NA	NA	Kif22_exon_chr1:198463170
1	Cd2bp2	56.3602	156.2585	1.4602	0.0347	UP	No	No	1	Cd2bp2_exon_chr1:198637425	1.0	1.0	0.0	NA	2	0.5229	0.5159	-0.007	NA	Cd2bp2_exon_chr1:198637425
1	Tbc1d10b	96.6784	152.3729	0.6626	0.2505	NC	No	No	3	Tbc1d10b_exon_chr1:198642942	0.9375	0.9907	0.0532	NA	5	0.4508	0.4119	-0.0389	NA	Tbc1d10b_exon_chr1:198642942
2	Tbc1d10b									Tbc1d10b_intron_chr1:198648052	0.0469	0.0093	-0.0375	NA	2	NA	NA	-0.0832	NA	Tbc1d10b_intron_chr1:198648052
3	Tbc1d10b									Tbc1d10b_intron_chr1:198651712	0.0156	0.0	-0.0156	NA	1	NA	NA	NA	NA	Tbc1d10b_intron_chr1:198651712
1	Dctpp1	157.688	151.6906	-0.0567	0.8751	NC	No	No	1	Dctpp1_exon_chr1:198703840	1.0	1.0	0.0	NA	1	NA	NA	NA	NA	Dctpp1_exon_chr1:198703840
1	Sephs2	2.5262	0.0	-3.9909	1.0	NC	No	No	1	Sephs2_exon_chr1:198721476	1.0	1.0	0.0	NA	1	NA	NA	NA	NA	Sephs2_exon_chr1:198721476
1	Zfp689	14.6698	22.9628	0.6235	1.0	NC	No	No	1	Zfp689_exon_chr1:198895832	1.0	1.0	0.0	NA	1	NA	NA	NA	NA	Zfp689_exon_chr1:198895832
1	Ccdc189	15.6451	8.4577	-0.8853	1.0	NC	No	No	1	Ccdc189_exon_chr1:199032334	1.0	1.0	0.0	NA	1	NA	NA	NA	NA	Ccdc189_exon_chr1:199032334
1	Zfp629	201.0248	92.7162	-1.129	0.0691	DOWN	No	No	1	Zfp629_exon_chr1:199061463	1.0	1.0	0.0	NA	3	0.6622	0.7035	0.0413	NA	Zfp629_exon_chr1:199061463
1	Bcl7c	166.4699	183.4461	0.1492	0.8134	NC	No	No	1	Bcl7c_exon_chr1:199155493	1.0	1.0	0.0	NA	1	NA	NA	NA	NA	Bcl7c_exon_chr1:199155493
1	Zfp668	43.8264	47.2481	0.112	0.9781	NC	No	No	2	Zfp668_exon_chr1:199313259	0.9218	1.0	0.0782	NA	2	0.0857	0.0162	-0.0696	NA	Zfp668_exon_chr1:199313259
2	Zfp668									Zfp668_intron_chr1:199320347	0.0782	0.0	-0.0782	NA	1	NA	NA	NA	NA	Zfp668_intron_chr1:199320347
1	Vkorc1	123.4772	292.1859	1.2372	0.0116	UP	No	No	1	Vkorc1_exon_chr1:199339221	1.0	1.0	0.0	NA	1	NA	NA	NA	NA	Vkorc1_exon_chr1:199339221
1	Prss36	39.9557	20.0536	-1.0105	0.3668	NC	No	No	1	Prss36_exon_chr1:199379844	1.0	1.0	0.0	NA	1	NA	NA	NA	NA	Prss36_exon_chr1:199379844
1	Pycard	28.177	12.0378	-1.2231	1.0	NC	No	No	1	Pycard_exon_chr1:199438282	1.0	1.0	0.0	NA	1	NA	NA	NA	NA	Pycard_exon_chr1:199438282
1	Cox6a2	35.1603	80.6575	1.2034	0.1433	NC	No	No	1	Cox6a2_exon_chr1:199624231	1.0	1.0	0.0	NA	1	NA	NA	NA	NA	Cox6a2_exon_chr1:199624231
1	RGD1310127	47.1355	123.7069	1.3856	0.0752	UP	No	Yes	1	RGD1310127_exon_chr1:199688995	1.0	1.0	0.0	NA	2	0.7628	0.8525	0.0897	Lengthening	RGD1310127_exon_chr1:199688995
1	Rgs10	126.4326	146.2	0.2115	0.7274	NC	No	No	2	Rgs10_exon_chr1:199782504	0.9088	0.8541	-0.0547	NA	3	0.6193	0.6497	0.0303	NA	Rgs10_exon_chr1:199782504
2	Rgs10									Rgs10_exon_chr1:199807723	0.0912	0.1459	0.0547	NA	1	NA	NA	NA	NA	Rgs10_exon_chr1:199807723
1	Mcmbp	52.2851	103.0378	0.9816	0.1338	NC	No	No	2	Mcmbp_exon_chr1:200118611	0.9808	1.0	0.0192	NA	1	NA	NA	NA	NA	Mcmbp_exon_chr1:200118611
2	Mcmbp									Mcmbp_intron_chr1:200136460	0.0192	0.0	-0.0192	NA	1	NA	NA	NA	NA	Mcmbp_intron_chr1:200136460
1	Fgfr2	27.6896	20.9433	-0.3963	0.9331	NC	No	No	2	Fgfr2_exon_chr1:200592629	0.8938	1.0	0.1062	NA	1	NA	NA	NA	NA	Fgfr2_exon_chr1:200592629
2	Fgfr2									Fgfr2_intron_chr1:200671012	0.1062	0.0	-0.1062	NA	1	NA	NA	NA	NA	Fgfr2_intron_chr1:200671012
1	Ate1	1512.1338	743.163	-1.0232	0.0004	DOWN	No	Yes	4	Ate1_exon_chr1:200813868	0.2432	0.2657	0.0225	NA	5	0.9382	0.1336	-0.8046	Shortening	Ate1_exon_chr1:200813868
2	Ate1									Ate1_exon_chr1:201070268	0.1378	0.1351	-0.0028	NA	1	NA	NA	NA	NA	Ate1_exon_chr1:201070268
3	Ate1									Ate1_exon_chr1:201071388	0.3001	0.1815	-0.1186	Down	1	NA	NA	NA	NA	Ate1_exon_chr1:201071388
4	Ate1									Ate1_intron_chr1:201026407	0.3109	0.4103	0.0994	NA	16	0.4445	0.4671	0.0226	Both	Ate1_intron_chr1:201026407
1	Nsmce4a	28.8825	49.5203	0.7711	1.0	NC	No	No	1	Nsmce4a_exon_chr1:201104013	1.0	1.0	0.0	NA	2	0.3052	0.3155	0.0103	NA	Nsmce4a_exon_chr1:201104013
1	RGD1305014	65.2652	59.8102	-0.1253	0.9642	NC	No	No	4	RGD1305014_exon_chr1:201925865	0.2272	0.2666	0.0394	NA	1	NA	NA	NA	NA	RGD1305014_exon_chr1:201925865
2	RGD1305014									RGD1305014_exon_chr1:201940143	0.177	0.1384	-0.0386	NA	1	NA	NA	NA	NA	RGD1305014_exon_chr1:201940143
3	RGD1305014									RGD1305014_intron_chr1:201932326	0.5342	0.3573	-0.1769	NA	3	NA	NA	0.1674	NA	RGD1305014_intron_chr1:201932326
4	RGD1305014									RGD1305014_intron_chr1:201937326	0.0616	0.2377	0.1762	NA	1	NA	NA	NA	NA	RGD1305014_intron_chr1:201937326
1	Ikzf5	76.0348	86.9938	0.2032	0.9344	NC	No	No	2	Ikzf5_exon_chr1:201965347	0.2011	0.2335	0.0323	NA	5	NA	NA	-0.4041	NA	Ikzf5_exon_chr1:201965347
2	Ikzf5									Ikzf5_exon_chr1:201968907	0.7989	0.7665	-0.0323	NA	1	NA	NA	NA	NA	Ikzf5_exon_chr1:201968907
1	Chst15	6.5474	3.9573	-0.718	1.0	NC	No	No	2	Chst15_intron_chr1:204254700	0.3108	1.0	0.6892	NA	1	NA	NA	NA	NA	Chst15_intron_chr1:204254700
2	Chst15									Chst15_intron_chr1:204271675	0.6892	0.0	-0.6892	NA	1	NA	NA	NA	NA	Chst15_intron_chr1:204271675
1	Oat	153.3132	301.0268	0.9865	0.0113	UP	No	Yes	1	Oat_exon_chr1:204563171	1.0	1.0	0.0	NA	2	0.3096	0.0824	-0.2272	Shortening	Oat_exon_chr1:204563171
1	Fam53b	158.9009	65.0844	-1.2872	0.2059	NC	No	No	2	Fam53b_exon_chr1:204718403	0.9322	0.9563	0.0241	NA	4	0.9265	1.0	0.0735	NA	Fam53b_exon_chr1:204718403
2	Fam53b									Fam53b_intron_chr1:204761726	0.0678	0.0437	-0.0241	NA	3	NA	NA	-0.1694	NA	Fam53b_intron_chr1:204761726
1	Eef1akmt2	69.8761	72.7786	0.059	0.9996	NC	No	No	1	Eef1akmt2_exon_chr1:204831919	1.0	1.0	0.0	NA	3	0.994	0.9456	-0.0484	NA	Eef1akmt2_exon_chr1:204831919
1	Uros	4.6318	1.1384	-2.1336	1.0	NC	No	No	1	Uros_exon_chr1:205757398	1.0	1.0	0.0	NA	2	NA	NA	-0.0568	NA	Uros_exon_chr1:205757398
1	Dhx32	12.5752	27.0841	1.1083	1.0	NC	No	No	1	Dhx32_exon_chr1:205790149	1.0	1.0	0.0	NA	2	NA	NA	-0.092	NA	Dhx32_exon_chr1:205790149
1	LOC100302465	4.4183	38.2251	3.1139	0.7701	NC	No	No	3	LOC100302465_exon_chr1:206325566	1.0	0.4371	-0.5629	NA	1	NA	NA	NA	NA	LOC100302465_exon_chr1:206325566
2	LOC100302465									LOC100302465_intron_chr1:206353707	0.0	0.1926	0.1926	NA	1	NA	NA	NA	NA	LOC100302465_intron_chr1:206353707
3	LOC100302465									LOC100302465_intron_chr1:206359518	0.0	0.3703	0.3703	NA	1	NA	NA	NA	NA	LOC100302465_intron_chr1:206359518
1	Mki67	1235.8063	894.3868	-0.4663	0.545	NC	No	Yes	7	Mki67_exon_chr1:207994234	0.1985	0.3751	0.1766	NA	2	0.6438	0.9592	0.3155	Lengthening	Mki67_exon_chr1:207994234
2	Mki67									Mki67_exon_chr1:207997386	0.2538	0.179	-0.0748	NA	4	0.442	0.5188	0.0768	NA	Mki67_exon_chr1:207997386
3	Mki67									Mki67_exon_chr1:208000674	0.2975	0.2369	-0.0606	NA	7	0.5487	0.7812	0.2325	NA	Mki67_exon_chr1:208000674
4	Mki67									Mki67_exon_chr1:208005048	0.1401	0.0867	-0.0534	NA	11	0.2118	0.5208	0.309	NA	Mki67_exon_chr1:208005048
5	Mki67									Mki67_exon_chr1:208008303	0.0582	0.0823	0.0242	NA	2	0.3083	0.0789	-0.2294	NA	Mki67_exon_chr1:208008303
6	Mki67									Mki67_exon_chr1:208012021	0.0229	0.0161	-0.0069	NA	3	NA	NA	0.2552	NA	Mki67_exon_chr1:208012021
7	Mki67									Mki67_exon_chr1:208018340	0.0261	0.0239	-0.0021	NA	1	NA	NA	NA	NA	Mki67_exon_chr1:208018340
1	Ebf3	6.9746	9.3148	0.4251	1.0	NC	No	No	3	Ebf3_exon_chr1:209525831	0.4964	0.6667	0.1703	NA	2	NA	NA	0.3214	NA	Ebf3_exon_chr1:209525831
2	Ebf3									Ebf3_exon_chr1:209640396	0.5036	0.0	-0.5036	NA	1	NA	NA	NA	NA	Ebf3_exon_chr1:209640396
3	Ebf3									Ebf3_intron_chr1:209634355	0.0	0.3333	0.3333	NA	1	NA	NA	NA	NA	Ebf3_intron_chr1:209634355
1	Bnip3	57.6894	124.7883	1.1132	0.0296	UP	No	Yes	1	Bnip3_exon_chr1:211249076	1.0	1.0	0.0	NA	3	1.0	0.8031	-0.1969	Shortening	Bnip3_exon_chr1:211249076
1	Tubgcp2	84.5073	79.8956	-0.0706	0.9807	NC	No	No	2	Tubgcp2_exon_chr1:212333952	0.8238	1.0	0.1762	NA	2	0.8197	0.9213	0.1016	NA	Tubgcp2_exon_chr1:212333952
2	Tubgcp2									Tubgcp2_exon_chr1:212350652	0.1762	0.0	-0.1762	NA	1	NA	NA	NA	NA	Tubgcp2_exon_chr1:212350652
1	Echs1	38.521	95.0413	1.3013	0.2255	NC	No	No	1	Echs1_exon_chr1:212570850	1.0	1.0	0.0	NA	2	NA	NA	-0.0236	NA	Echs1_exon_chr1:212570850
1	Bet1l	113.6244	225.8698	0.9852	0.034	UP	No	No	1	Bet1l_exon_chr1:213604013	1.0	1.0	0.0	NA	4	0.9844	0.9748	-0.0096	NA	Bet1l_exon_chr1:213604013
1	Sirt3	45.8692	69.3469	0.5948	0.687	NC	No	No	1	Sirt3_exon_chr1:213613945	1.0	1.0	0.0	NA	1	NA	NA	NA	NA	Sirt3_exon_chr1:213613945
1	Cox8b	107.1888	40.7382	-1.3972	0.3001	NC	No	No	1	Cox8b_exon_chr1:213648937	1.0	1.0	0.0	NA	1	NA	NA	NA	NA	Cox8b_exon_chr1:213648937
1	Ifitm2	424.2681	697.1771	0.7154	0.0141	UP	No	No	1	Ifitm2_exon_chr1:213750543	1.0	1.0	0.0	NA	1	NA	NA	NA	NA	Ifitm2_exon_chr1:213750543
1	Ifitm3	817.3159	751.066	-0.1224	0.8946	NC	No	No	1	Ifitm3_exon_chr1:213811014	1.0	1.0	0.0	NA	1	NA	NA	NA	NA	Ifitm3_exon_chr1:213811014
1	Slc25a22	147.8295	47.5723	-1.6398	0.0135	DOWN	No	No	2	Slc25a22_exon_chr1:213974984	0.5	0.4963	-0.0037	NA	1	NA	NA	NA	NA	Slc25a22_exon_chr1:213974984
2	Slc25a22									Slc25a22_exon_chr1:214411890	0.5	0.5037	0.0037	NA	1	NA	NA	NA	NA	Slc25a22_exon_chr1:214411890
1	Pidd1	536.0062	138.3124	-1.9659	0.0	DOWN	No	No	2	Pidd1_exon_chr1:213982592	0.4991	0.5	0.0009	NA	1	NA	NA	NA	NA	Pidd1_exon_chr1:213982592
2	Pidd1									Pidd1_exon_chr1:214419498	0.5009	0.5	-0.0009	NA	1	NA	NA	NA	NA	Pidd1_exon_chr1:214419498
1	Polr2l	2728.306	2198.0703	-0.3105	0.2552	NC	No	No	2	Polr2l_exon_chr1:214015329	0.4975	0.4971	-0.0005	NA	1	NA	NA	NA	NA	Polr2l_exon_chr1:214015329
2	Polr2l									Polr2l_exon_chr1:214452235	0.5025	0.5029	0.0005	NA	1	NA	NA	NA	NA	Polr2l_exon_chr1:214452235
1	Chid1	358.0686	564.3968	0.6591	0.1186	NC	No	No	2	Chid1_exon_chr1:214039777	0.4978	0.4885	-0.0093	NA	3	0.4775	0.4655	-0.012	NA	Chid1_exon_chr1:214039777
2	Chid1									Chid1_exon_chr1:214476683	0.5022	0.4974	-0.0048	NA	3	0.4793	0.4654	-0.0139	NA	Chid1_exon_chr1:214476683
1	Rnh1	1162.2566	917.0605	-0.341	0.1511	NC	No	No	1	Rnh1_exon_chr1:214151589	1.0	1.0	0.0	NA	1	NA	NA	NA	NA	Rnh1_exon_chr1:214151589
1	Hras	271.389	335.0814	0.3085	0.5958	NC	No	No	1	Hras_exon_chr1:214179159	1.0	1.0	0.0	NA	4	0.424	0.412	-0.0121	NA	Hras_exon_chr1:214179159
1	Irf7	134.4572	60.0206	-1.1634	0.0565	DOWN	No	Yes	1	Irf7_exon_chr1:214249731	1.0	1.0	0.0	NA	2	0.9532	0.8804	-0.0728	Shortening	Irf7_exon_chr1:214249731
1	Cdhr5	15.166	31.3814	1.0608	1.0	NC	No	No	2	Cdhr5_exon_chr1:214255650	0.839	1.0	0.161	NA	1	NA	NA	NA	NA	Cdhr5_exon_chr1:214255650
2	Cdhr5									Cdhr5_intron_chr1:214259792	0.161	0.0	-0.161	NA	1	NA	NA	NA	NA	Cdhr5_intron_chr1:214259792
1	Sct	29.8618	2.6562	-3.5729	0.4805	NC	No	No	1	Sct_exon_chr1:214265060	1.0	1.0	0.0	NA	1	NA	NA	NA	NA	Sct_exon_chr1:214265060
1	Deaf1	70.3526	27.4268	-1.357	0.2136	NC	No	No	2	Deaf1_exon_chr1:214284214	0.9284	1.0	0.0716	NA	1	NA	NA	NA	NA	Deaf1_exon_chr1:214284214
2	Deaf1									Deaf1_intron_chr1:214291777	0.0716	0.0	-0.0716	NA	1	NA	NA	NA	NA	Deaf1_intron_chr1:214291777
1	Tollip	226.6578	216.4021	-0.0617	0.8831	NC	No	Yes	1	Tollip_exon_chr1:214826986	1.0	1.0	0.0	NA	5	0.906	0.5269	-0.3791	Both	Tollip_exon_chr1:214826986
1	Mob2	108.9947	134.2191	0.2993	0.7261	NC	No	No	4	Mob2_exon_chr1:214954350	0.8277	0.8385	0.0108	NA	1	NA	NA	NA	NA	Mob2_exon_chr1:214954350
2	Mob2									Mob2_exon_chr1:214955062	0.0625	0.1535	0.0911	NA	1	NA	NA	NA	NA	Mob2_exon_chr1:214955062
3	Mob2									Mob2_intron_chr1:214961677	0.0696	0.0079	-0.0616	NA	1	NA	NA	NA	NA	Mob2_intron_chr1:214961677
4	Mob2									Mob2_intron_chr1:215010877	0.0402	0.0	-0.0402	NA	1	NA	NA	NA	NA	Mob2_intron_chr1:215010877
1	Dusp8	2.9987	11.8287	2.0064	1.0	NC	No	No	1	Dusp8_exon_chr1:215031882	1.0	1.0	0.0	NA	1	NA	NA	NA	NA	Dusp8_exon_chr1:215031882
1	Cttn	1318.5715	1342.944	0.027	0.8804	NC	No	Yes	2	Cttn_exon_chr1:215256765	0.4921	0.4956	0.0035	NA	4	0.9618	0.6719	-0.2899	Shortening	Cttn_exon_chr1:215256765
2	Cttn									Cttn_exon_chr1:217604078	0.4929	0.5018	0.0088	NA	4	0.9619	0.6686	-0.2932	Shortening	Cttn_exon_chr1:217604078
1	Ctsd	2598.8916	2834.5167	0.1247	0.6615	NC	No	No	1	Ctsd_exon_chr1:215542391	1.0	1.0	0.0	NA	1	NA	NA	NA	NA	Ctsd_exon_chr1:215542391
1	H19	24492.1414	30143.12	0.2995	0.4885	NC	No	No	2	H19_exon_chr1:215744994	0.9379	0.9816	0.0437	NA	1	NA	NA	NA	NA	H19_exon_chr1:215744994
2	H19									H19_exon_chr1:215747080	0.0616	0.0183	-0.0433	NA	14	0.61	0.6145	0.0046	NA	H19_exon_chr1:215747080
1	Igf2	18423.1135	14367.4147	-0.3587	0.4406	NC	No	Yes	1	Igf2_exon_chr1:215831226	1.0	1.0	0.0	NA	15	0.5114	0.7811	0.2697	Lengthening	Igf2_exon_chr1:215831226
1	Mir483	2.5132	1.8973	-0.4097	1.0	NC	No	No	1	Mir483_exon_chr1:215832160	1.0	1.0	0.0	NA	1	NA	NA	NA	NA	Mir483_exon_chr1:215832160
1	Ascl2	11.818	1.8973	-2.6874	1.0	NC	No	No	1	Ascl2_exon_chr1:216154512	1.0	1.0	0.0	NA	1	NA	NA	NA	NA	Ascl2_exon_chr1:216154512
1	Nap1l4	510.1142	689.1332	0.4391	0.1731	NC	No	No	3	Nap1l4_exon_chr1:216716395	0.9601	0.9906	0.0305	NA	1	NA	NA	NA	NA	Nap1l4_exon_chr1:216716395
2	Nap1l4									Nap1l4_exon_chr1:216735739	0.0128	0.0	-0.0128	NA	1	NA	NA	NA	NA	Nap1l4_exon_chr1:216735739
3	Nap1l4									Nap1l4_exon_chr1:216737793	0.0113	0.0043	-0.007	NA	1	NA	NA	NA	NA	Nap1l4_exon_chr1:216737793
1	Cars	497.4768	495.5536	-0.0054	0.9646	NC	Yes	No	3	Cars_exon_chr1:216760198	0.4167	0.6453	0.2286	Up	4	0.7538	0.7649	0.0111	NA	Cars_exon_chr1:216760198
2	Cars									Cars_exon_chr1:216761638	0.1669	0.0347	-0.1323	Down	1	NA	NA	NA	NA	Cars_exon_chr1:216761638
3	Cars									Cars_intron_chr1:216763675	0.4164	0.3201	-0.0963	NA	1	NA	NA	NA	NA	Cars_intron_chr1:216763675
1	Tnfrsf26	26.0714	10.3973	-1.3187	1.0	NC	No	No	2	Tnfrsf26_exon_chr1:216810376	1.0	0.4098	-0.5902	NA	1	NA	NA	NA	NA	Tnfrsf26_exon_chr1:216810376
2	Tnfrsf26									Tnfrsf26_intron_chr1:216828533	0.0	0.5902	0.5902	NA	1	NA	NA	NA	NA	Tnfrsf26_intron_chr1:216828533
1	Osbpl5	111.0752	142.6922	0.36	0.6004	NC	No	No	3	Osbpl5_exon_chr1:216867438	0.8999	0.8864	-0.0135	NA	1	NA	NA	NA	NA	Osbpl5_exon_chr1:216867438
2	Osbpl5									Osbpl5_intron_chr1:216869267	0.0817	0.1136	0.0319	NA	5	NA	NA	-0.1561	NA	Osbpl5_intron_chr1:216869267
3	Osbpl5									Osbpl5_intron_chr1:216920333	0.0184	0.0	-0.0184	NA	1	NA	NA	NA	NA	Osbpl5_intron_chr1:216920333
1	Nadsyn1	5.5291	18.3284	1.7702	1.0	NC	No	No	1	Nadsyn1_exon_chr1:216986212	1.0	1.0	0.0	NA	1	NA	NA	NA	NA	Nadsyn1_exon_chr1:216986212
1	Ppfia1	599.8605	461.5091	-0.3784	0.2522	NC	No	Yes	9	Ppfia1_exon_chr1:217645500	0.3922	0.4844	0.0922	NA	5	0.6696	0.5453	-0.1244	Shortening	Ppfia1_exon_chr1:217645500
2	Ppfia1									Ppfia1_exon_chr1:217653128	0.1327	0.1297	-0.003	NA	1	NA	NA	NA	NA	Ppfia1_exon_chr1:217653128
3	Ppfia1									Ppfia1_exon_chr1:217675854	0.012	0.0014	-0.0106	NA	1	NA	NA	NA	NA	Ppfia1_exon_chr1:217675854
4	Ppfia1									Ppfia1_exon_chr1:217678100	0.196	0.0985	-0.0975	NA	1	NA	NA	NA	NA	Ppfia1_exon_chr1:217678100
5	Ppfia1									Ppfia1_exon_chr1:217683261	0.0234	0.0652	0.0418	NA	1	NA	NA	NA	NA	Ppfia1_exon_chr1:217683261
6	Ppfia1									Ppfia1_exon_chr1:217686816	0.0133	0.007	-0.0063	NA	1	NA	NA	NA	NA	Ppfia1_exon_chr1:217686816
7	Ppfia1									Ppfia1_intron_chr1:217659559	0.0	0.014	0.014	NA	1	NA	NA	NA	NA	Ppfia1_intron_chr1:217659559
8	Ppfia1									Ppfia1_intron_chr1:217679862	0.2255	0.1848	-0.0407	NA	1	NA	NA	NA	NA	Ppfia1_intron_chr1:217679862
9	Ppfia1									Ppfia1_intron_chr1:217686375	0.0049	0.015	0.0101	NA	1	NA	NA	NA	NA	Ppfia1_intron_chr1:217686375
1	Ccnd1	5281.5461	4385.0933	-0.2683	0.5526	NC	No	Yes	1	Ccnd1_exon_chr1:218093710	1.0	1.0	0.0	NA	14	0.9322	0.2737	-0.6584	Both	Ccnd1_exon_chr1:218093710
1	Ppp6r3	181.9791	236.1702	0.3754	0.455	NC	No	Yes	2	Ppp6r3_exon_chr1:218697858	0.9264	0.9274	0.001	NA	5	0.9627	0.1796	-0.7831	Shortening	Ppp6r3_exon_chr1:218697858
2	Ppp6r3									Ppp6r3_intron_chr1:218719310	0.0736	0.0726	-0.001	NA	1	NA	NA	NA	NA	Ppp6r3_intron_chr1:218719310
1	Lrp5	184.487	23.4664	-2.9687	0.0004	DOWN	No	Yes	1	Lrp5_exon_chr1:218817297	1.0	1.0	0.0	NA	2	0.9787	0.4326	-0.5461	Shortening	Lrp5_exon_chr1:218817297
1	Tcirg1	155.5307	120.3905	-0.3831	0.5119	NC	No	No	1	Tcirg1_exon_chr1:219127879	1.0	1.0	0.0	NA	1	NA	NA	NA	NA	Tcirg1_exon_chr1:219127879
1	Ndufs8	592.6842	554.0012	-0.0977	0.7274	NC	No	No	1	Ndufs8_exon_chr1:219141494	1.0	1.0	0.0	NA	1	NA	NA	NA	NA	Ndufs8_exon_chr1:219141494
1	Aldh3b1	89.284	53.8858	-0.72	0.618	NC	No	No	1	Aldh3b1_exon_chr1:219146067	1.0	1.0	0.0	NA	1	NA	NA	NA	NA	Aldh3b1_exon_chr1:219146067
1	Ndufv1	348.5104	474.241	0.4428	0.2122	NC	No	No	1	Ndufv1_exon_chr1:219254453	1.0	1.0	0.0	NA	1	NA	NA	NA	NA	Ndufv1_exon_chr1:219254453
1	Gstp1	4729.1793	4721.9412	-0.0029	0.9662	NC	No	No	1	Gstp1_exon_chr1:219291933	1.0	1.0	0.0	NA	1	NA	NA	NA	NA	Gstp1_exon_chr1:219291933
1	Aip	203.1796	276.8132	0.4467	0.3769	NC	No	No	1	Aip_exon_chr1:219362891	1.0	1.0	0.0	NA	2	0.0548	0.047	-0.0079	NA	Aip_exon_chr1:219362891
1	Rpl35al1	1635.3895	1244.6127	-0.3916	0.2751	NC	No	Yes	6	Rpl35al1_exon_chr11:70963299	0.7032	0.8067	0.1034	NA	1	NA	NA	NA	NA	Rpl35al1_exon_chr11:70963299
2	Rpl35al1									Rpl35al1_exon_chr11:70966256	0.0532	0.0138	-0.0393	NA	1	NA	NA	NA	NA	Rpl35al1_exon_chr11:70966256
3	Rpl35al1									Rpl35al1_exon_chr12:7186711	0.0292	0.0247	-0.0045	NA	1	NA	NA	NA	NA	Rpl35al1_exon_chr12:7186711
4	Rpl35al1									Rpl35al1_exon_chr12:7424496	0.0334	0.0286	-0.0048	NA	1	NA	NA	NA	NA	Rpl35al1_exon_chr12:7424496
5	Rpl35al1									Rpl35al1_exon_chr1:219395623	0.1699	0.1126	-0.0572	NA	2	0.7006	0.8671	0.1665	Lengthening	Rpl35al1_exon_chr1:219395623
6	Rpl35al1									Rpl35al1_intron_chr12:7423993	0.0111	0.0136	0.0025	NA	5	NA	NA	-0.5008	NA	Rpl35al1_intron_chr12:7423993
1	Rps6kb2	56.2416	34.2926	-0.7299	0.5043	NC	No	No	1	Rps6kb2_exon_chr1:219406612	1.0	1.0	0.0	NA	2	0.4571	0.3373	-0.1198	NA	Rps6kb2_exon_chr1:219406612
1	Ssh3	76.1453	65.0043	-0.2188	0.8631	NC	No	No	2	Ssh3_exon_chr1:219512843	0.9801	0.9563	-0.0238	NA	1	NA	NA	NA	NA	Ssh3_exon_chr1:219512843
2	Ssh3									Ssh3_intron_chr1:219518781	0.0199	0.0437	0.0238	NA	1	NA	NA	NA	NA	Ssh3_intron_chr1:219518781
1	Ankrd13d	26.6819	18.6836	-0.5029	1.0	NC	No	No	1	Ankrd13d_exon_chr1:219520825	1.0	1.0	0.0	NA	3	0.3436	0.3649	0.0213	NA	Ankrd13d_exon_chr1:219520825
1	Grk2	45.8021	105.9072	1.2115	0.1067	NC	No	No	2	Grk2_exon_chr1:219536849	0.9034	0.9866	0.0832	NA	1	NA	NA	NA	NA	Grk2_exon_chr1:219536849
2	Grk2									Grk2_exon_chr1:219542347	0.0966	0.0134	-0.0832	NA	1	NA	NA	NA	NA	Grk2_exon_chr1:219542347
1	Kdm2a	301.0573	187.0045	-0.6839	0.0691	DOWN	No	No	3	Kdm2a_exon_chr1:219569247	0.8659	0.9165	0.0507	NA	6	0.9449	0.924	-0.0209	NA	Kdm2a_exon_chr1:219569247
2	Kdm2a									Kdm2a_exon_chr1:219608685	0.0514	0.0406	-0.0109	NA	1	NA	NA	NA	NA	Kdm2a_exon_chr1:219608685
3	Kdm2a									Kdm2a_intron_chr1:219592035	0.0827	0.0429	-0.0398	NA	6	NA	NA	-0.1693	NA	Kdm2a_intron_chr1:219592035
1	Rhod	97.8999	90.3147	-0.1102	0.9511	NC	No	No	2	Rhod_exon_chr1:219669279	0.926	0.8046	-0.1214	NA	2	0.9848	0.9873	0.0025	NA	Rhod_exon_chr1:219669279
2	Rhod									Rhod_intron_chr1:219674179	0.074	0.1954	0.1214	NA	2	NA	NA	-0.0184	NA	Rhod_intron_chr1:219674179
1	Lrfn4	230.7963	167.5518	-0.4633	0.2859	NC	No	No	1	Lrfn4_exon_chr1:219850885	1.0	1.0	0.0	NA	1	NA	NA	NA	NA	Lrfn4_exon_chr1:219850885
1	Rce1	36.5234	12.6995	-1.4828	0.0752	DOWN	No	No	1	Rce1_exon_chr1:219861475	1.0	1.0	0.0	NA	1	NA	NA	NA	NA	Rce1_exon_chr1:219861475
1	Rbm4	46.1368	56.2425	0.2798	0.8293	NC	No	No	2	Rbm4_exon_chr1:220040146	0.8231	0.7929	-0.0301	NA	1	NA	NA	NA	NA	Rbm4_exon_chr1:220040146
2	Rbm4									Rbm4_intron_chr1:220047470	0.1769	0.2071	0.0301	NA	3	NA	NA	0.4165	NA	Rbm4_intron_chr1:220047470
1	Rbm14	56.6885	73.1344	0.3749	0.7157	NC	No	No	1	Rbm14_exon_chr1:220057266	1.0	1.0	0.0	NA	2	0.1622	0.0579	-0.1043	NA	Rbm14_exon_chr1:220057266
1	Ccs	216.9264	228.734	0.0643	0.8829	NC	No	No	1	Ccs_exon_chr1:220075547	1.0	1.0	0.0	NA	1	NA	NA	NA	NA	Ccs_exon_chr1:220075547
1	Bbs1	60.2627	68.3701	0.1717	1.0	NC	No	No	2	Bbs1_exon_chr1:220149603	0.7814	0.9891	0.2077	NA	2	0.0995	0.0077	-0.0918	NA	Bbs1_exon_chr1:220149603
2	Bbs1									Bbs1_intron_chr1:220153981	0.2186	0.0109	-0.2077	NA	1	NA	NA	NA	NA	Bbs1_intron_chr1:220153981
1	Dpp3	369.8278	315.2411	-0.2276	0.5729	NC	No	No	2	Dpp3_exon_chr1:220166684	1.0	0.9632	-0.0368	NA	1	NA	NA	NA	NA	Dpp3_exon_chr1:220166684
2	Dpp3									Dpp3_intron_chr1:220173216	0.0	0.0368	0.0368	NA	1	NA	NA	NA	NA	Dpp3_intron_chr1:220173216
1	Peli3	4.7504	14.2578	1.589	1.0	NC	No	No	2	Peli3_exon_chr1:220194385	0.8945	0.9018	0.0073	NA	1	NA	NA	NA	NA	Peli3_exon_chr1:220194385
2	Peli3									Peli3_intron_chr1:220202701	0.1055	0.0982	-0.0073	NA	1	NA	NA	NA	NA	Peli3_intron_chr1:220202701
1	Tmem151a	994.8261	361.7736	-1.4607	0.0782	DOWN	No	No	2	Tmem151a_exon_chr1:220375233	0.497	0.4933	-0.0038	NA	2	0.9324	0.8992	-0.0332	NA	Tmem151a_exon_chr1:220375233
2	Tmem151a									Tmem151a_exon_chr1:220464407	0.499	0.5037	0.0047	NA	2	0.9327	0.8973	-0.0354	NA	Tmem151a_exon_chr1:220464407
1	Cnih2	20.6759	23.8506	0.2132	1.0	NC	No	No	1	Cnih2_exon_chr1:220475115	1.0	1.0	0.0	NA	1	NA	NA	NA	NA	Cnih2_exon_chr1:220475115
1	Rab1b	996.7927	683.6472	-0.5455	0.0869	NC	No	No	2	Rab1b_exon_chr1:220482603	0.5126	0.5231	0.0106	NA	3	1.0	0.96	-0.04	NA	Rab1b_exon_chr1:220482603
2	Rab1b									Rab1b_intron_chr1:220491392	0.4874	0.4769	-0.0106	NA	3	1.0	0.9681	-0.0319	NA	Rab1b_intron_chr1:220491392
1	Klc2	177.8785	110.2123	-0.6886	0.2089	NC	No	No	1	Klc2_exon_chr1:220493098	1.0	1.0	0.0	NA	1	NA	NA	NA	NA	Klc2_exon_chr1:220493098
1	Pacs1	261.6235	123.9189	-1.0764	0.0024	DOWN	No	No	4	Pacs1_exon_chr1:220516431	0.8847	0.8462	-0.0385	NA	1	NA	NA	NA	NA	Pacs1_exon_chr1:220516431
2	Pacs1									Pacs1_exon_chr1:220518241	0.0846	0.0911	0.0064	NA	1	NA	NA	NA	NA	Pacs1_exon_chr1:220518241
3	Pacs1									Pacs1_exon_chr1:220537774	0.0161	0.0087	-0.0075	NA	1	NA	NA	NA	NA	Pacs1_exon_chr1:220537774
4	Pacs1									Pacs1_intron_chr1:220644286	0.0145	0.0471	0.0326	NA	2	NA	NA	0.6667	NA	Pacs1_intron_chr1:220644286
1	Sf3b2	2308.242	2241.0836	-0.044	0.8821	NC	No	No	8	Sf3b2_exon_chr1:220646284	0.1707	0.1778	0.007	NA	2	0.5461	0.4231	-0.1231	NA	Sf3b2_exon_chr1:220646284
2	Sf3b2									Sf3b2_exon_chr1:220646874	0.0349	0.0271	-0.0077	NA	1	NA	NA	NA	NA	Sf3b2_exon_chr1:220646874
3	Sf3b2									Sf3b2_exon_chr1:220652544	0.0653	0.0846	0.0193	NA	1	NA	NA	NA	NA	Sf3b2_exon_chr1:220652544
4	Sf3b2									Sf3b2_exon_chr1:220652777	0.041	0.0223	-0.0187	NA	1	NA	NA	NA	NA	Sf3b2_exon_chr1:220652777
5	Sf3b2									Sf3b2_exon_chr1:220653113	0.0318	0.0191	-0.0127	NA	1	NA	NA	NA	NA	Sf3b2_exon_chr1:220653113
6	Sf3b2									Sf3b2_exon_chr1:220656694	0.0698	0.0133	-0.0565	NA	1	NA	NA	NA	NA	Sf3b2_exon_chr1:220656694
7	Sf3b2									Sf3b2_exon_chr1:220659360	0.3382	0.4162	0.0779	NA	1	NA	NA	NA	NA	Sf3b2_exon_chr1:220659360
8	Sf3b2									Sf3b2_exon_chr1:220659618	0.2445	0.2375	-0.007	NA	2	0.986	0.989	0.003	NA	Sf3b2_exon_chr1:220659618
1	Cst6	1.0053	1.1384	0.1793	1.0	NC	No	No	1	Cst6_exon_chr1:220727486	1.0	1.0	0.0	NA	1	NA	NA	NA	NA	Cst6_exon_chr1:220727486
1	Banf1	514.2545	805.1996	0.6505	0.0515	UP	No	No	1	Banf1_exon_chr1:220744737	1.0	1.0	0.0	NA	1	NA	NA	NA	NA	Banf1_exon_chr1:220744737
1	Sart1	853.472	707.6296	-0.2729	0.3773	NC	No	No	3	Sart1_exon_chr1:220762566	0.2521	0.5304	0.2782	Up	1	NA	NA	NA	NA	Sart1_exon_chr1:220762566
2	Sart1									Sart1_exon_chr1:220765735	0.3756	0.22	-0.1555	Down	1	NA	NA	NA	NA	Sart1_exon_chr1:220765735
3	Sart1									Sart1_exon_chr1:220767559	0.3713	0.2491	-0.1222	NA	1	NA	NA	NA	NA	Sart1_exon_chr1:220767559
1	Drap1	3110.8556	2240.5404	-0.4742	0.0912	NC	No	No	3	Drap1_exon_chr1:220804484	0.5887	0.6519	0.0632	NA	1	NA	NA	NA	NA	Drap1_exon_chr1:220804484
2	Drap1									Drap1_exon_chr1:220805185	0.3887	0.3138	-0.075	NA	1	NA	NA	NA	NA	Drap1_exon_chr1:220805185
3	Drap1									Drap1_exon_chr1:220806433	0.0225	0.0343	0.0118	NA	1	NA	NA	NA	NA	Drap1_exon_chr1:220806433
1	Mus81	51.6681	112.4326	1.1255	0.1433	NC	No	No	1	Mus81_exon_chr1:220862650	1.0	1.0	0.0	NA	1	NA	NA	NA	NA	Mus81_exon_chr1:220862650
1	Kat5	139.9311	70.8724	-0.9793	0.0974	DOWN	No	No	1	Kat5_exon_chr1:220968330	1.0	1.0	0.0	NA	1	NA	NA	NA	NA	Kat5_exon_chr1:220968330
1	Sipa1	299.5289	87.055	-1.7905	0.0	DOWN	No	No	1	Sipa1_exon_chr1:221006685	1.0	1.0	0.0	NA	1	NA	NA	NA	NA	Sipa1_exon_chr1:221006685
1	Ehbp1l1	349.9071	581.4021	0.7311	0.0376	UP	No	No	4	Ehbp1l1_exon_chr1:221062246	0.9402	0.9354	-0.0048	NA	1	NA	NA	NA	NA	Ehbp1l1_exon_chr1:221062246
2	Ehbp1l1									Ehbp1l1_exon_chr1:221077963	0.0165	0.0172	0.0008	NA	5	NA	NA	0.2695	NA	Ehbp1l1_exon_chr1:221077963
3	Ehbp1l1									Ehbp1l1_intron_chr1:221073394	0.0383	0.0367	-0.0015	NA	4	NA	NA	0.0313	NA	Ehbp1l1_intron_chr1:221073394
4	Ehbp1l1									Ehbp1l1_intron_chr1:221074501	0.0	0.01	0.01	NA	1	NA	NA	NA	NA	Ehbp1l1_intron_chr1:221074501
1	Fam89b	429.1325	582.4506	0.4408	0.1656	NC	No	No	1	Fam89b_exon_chr1:221086676	1.0	1.0	0.0	NA	1	NA	NA	NA	NA	Fam89b_exon_chr1:221086676
1	Znrd2	204.9938	189.5859	-0.1203	0.8161	NC	No	No	1	Znrd2_exon_chr1:221088503	1.0	1.0	0.0	NA	2	0.0679	0.0504	-0.0175	NA	Znrd2_exon_chr1:221088503
1	Scyl1	723.2024	585.8026	-0.3093	0.4125	NC	No	No	1	Scyl1_exon_chr1:221116263	1.0	1.0	0.0	NA	5	0.5159	0.5455	0.0296	NA	Scyl1_exon_chr1:221116263
1	Frmd8	126.5906	100.1124	-0.3319	0.7395	NC	No	No	2	Frmd8_exon_chr1:221214756	0.9019	0.9823	0.0805	NA	3	0.997	0.9265	-0.0705	NA	Frmd8_exon_chr1:221214756
2	Frmd8									Frmd8_intron_chr1:221220754	0.0981	0.0177	-0.0805	NA	1	NA	NA	NA	NA	Frmd8_intron_chr1:221220754
1	Dpf2	377.7292	377.6468	0.0	0.9383	NC	No	No	2	Dpf2_exon_chr1:221255017	0.9822	0.9972	0.015	NA	1	NA	NA	NA	NA	Dpf2_exon_chr1:221255017
2	Dpf2									Dpf2_intron_chr1:221258761	0.0178	0.0028	-0.015	NA	1	NA	NA	NA	NA	Dpf2_intron_chr1:221258761
1	Cdc42ep2	32.2521	34.9445	0.1057	1.0	NC	No	No	2	Cdc42ep2_exon_chr1:221273570	0.8129	0.9692	0.1563	NA	1	NA	NA	NA	NA	Cdc42ep2_exon_chr1:221273570
2	Cdc42ep2									Cdc42ep2_intron_chr1:221281154	0.1871	0.0308	-0.1563	NA	1	NA	NA	NA	NA	Cdc42ep2_intron_chr1:221281154
1	Pola2	83.3184	154.8994	0.8987	0.2266	NC	No	No	3	Pola2_exon_chr1:221297905	0.8849	0.9015	0.0166	NA	1	NA	NA	NA	NA	Pola2_exon_chr1:221297905
2	Pola2									Pola2_intron_chr1:221317043	0.0304	0.0638	0.0334	NA	1	NA	NA	NA	NA	Pola2_intron_chr1:221317043
3	Pola2									Pola2_intron_chr1:221321249	0.0847	0.0347	-0.0499	NA	1	NA	NA	NA	NA	Pola2_intron_chr1:221321249
1	Capn1	388.637	331.0373	-0.2358	0.6843	NC	No	No	2	Capn1_exon_chr1:221346848	0.9761	0.9853	0.0091	NA	1	NA	NA	NA	NA	Capn1_exon_chr1:221346848
2	Capn1									Capn1_intron_chr1:221354152	0.0239	0.0147	-0.0091	NA	1	NA	NA	NA	NA	Capn1_intron_chr1:221354152
1	Tm7sf2	17.5951	16.1036	-0.1353	1.0	NC	No	No	1	Tm7sf2_exon_chr1:221426299	1.0	1.0	0.0	NA	1	NA	NA	NA	NA	Tm7sf2_exon_chr1:221426299
1	Zfpl1	86.2245	91.1336	0.0725	0.9933	NC	No	No	1	Zfpl1_exon_chr1:221445037	1.0	1.0	0.0	NA	1	NA	NA	NA	NA	Zfpl1_exon_chr1:221445037
1	Arl2	2.2738	1.5178	-0.6303	1.0	NC	No	No	1	Arl2_exon_chr1:221504597	1.0	1.0	0.0	NA	1	NA	NA	NA	NA	Arl2_exon_chr1:221504597
1	Ppp2r5b	344.329	161.5395	-1.1002	0.0219	DOWN	No	No	1	Ppp2r5b_exon_chr1:221598082	1.0	1.0	0.0	NA	1	NA	NA	NA	NA	Ppp2r5b_exon_chr1:221598082
1	Rps6ka4	141.2239	120.692	-0.234	0.7274	NC	No	No	1	Rps6ka4_exon_chr1:222088260	1.0	1.0	0.0	NA	1	NA	NA	NA	NA	Rps6ka4_exon_chr1:222088260
1	Prdx5	1405.8768	1254.9285	-0.1638	0.6817	NC	No	No	1	Prdx5_exon_chr1:222164702	1.0	1.0	0.0	NA	1	NA	NA	NA	NA	Prdx5_exon_chr1:222164702
1	Esrra	375.8908	216.9801	-0.7915	0.0383	DOWN	No	No	2	Esrra_exon_chr1:222169758	0.9891	1.0	0.0109	NA	1	NA	NA	NA	NA	Esrra_exon_chr1:222169758
2	Esrra									Esrra_intron_chr1:222177084	0.0109	0.0	-0.0109	NA	1	NA	NA	NA	NA	Esrra_intron_chr1:222177084
1	Gpr137	61.3543	112.313	0.8725	0.2255	NC	No	No	1	Gpr137_exon_chr1:222194729	1.0	1.0	0.0	NA	1	NA	NA	NA	NA	Gpr137_exon_chr1:222194729
1	Fkbp2	507.1822	759.6319	0.5816	0.1253	NC	No	No	1	Fkbp2_exon_chr1:222232488	1.0	1.0	0.0	NA	1	NA	NA	NA	NA	Fkbp2_exon_chr1:222232488
1	Vegfb	12.4392	2.2767	-2.4771	1.0	NC	No	No	1	Vegfb_exon_chr1:222241080	1.0	1.0	0.0	NA	1	NA	NA	NA	NA	Vegfb_exon_chr1:222241080
1	Dnajc4	25.2257	28.7211	0.1939	1.0	NC	No	No	1	Dnajc4_exon_chr1:222243085	1.0	1.0	0.0	NA	1	NA	NA	NA	NA	Dnajc4_exon_chr1:222243085
1	Nudt22	30.1097	16.2742	-0.8953	1.0	NC	No	No	1	Nudt22_exon_chr1:222247684	1.0	1.0	0.0	NA	1	NA	NA	NA	NA	Nudt22_exon_chr1:222247684
1	Stip1	508.9689	560.3528	0.1421	0.6953	NC	No	No	5	Stip1_exon_chr1:222274600	0.8753	0.9357	0.0604	NA	1	NA	NA	NA	NA	Stip1_exon_chr1:222274600
2	Stip1									Stip1_exon_chr1:222279039	0.0154	0.0	-0.0154	NA	1	NA	NA	NA	NA	Stip1_exon_chr1:222279039
3	Stip1									Stip1_exon_chr1:222281135	0.0463	0.0004	-0.0459	NA	1	NA	NA	NA	NA	Stip1_exon_chr1:222281135
4	Stip1									Stip1_exon_chr1:222281576	0.0469	0.0066	-0.0403	NA	2	NA	NA	-0.1624	NA	Stip1_exon_chr1:222281576
5	Stip1									Stip1_intron_chr1:222285494	0.0	0.0451	0.0451	NA	1	NA	NA	NA	NA	Stip1_intron_chr1:222285494
1	Otub1	164.6215	191.1987	0.2161	0.6896	NC	No	No	1	Otub1_exon_chr1:222452717	1.0	1.0	0.0	NA	2	0.4513	0.5343	0.083	NA	Otub1_exon_chr1:222452717
1	Cox8a	4042.1296	3214.9221	-0.33	0.2089	NC	No	No	1	Cox8a_exon_chr1:222466896	1.0	1.0	0.0	NA	1	NA	NA	NA	NA	Cox8a_exon_chr1:222466896
1	Naa40	76.7147	32.1734	-1.2604	0.1078	NC	No	No	3	Naa40_exon_chr1:222480389	0.808	0.9185	0.1104	NA	1	NA	NA	NA	NA	Naa40_exon_chr1:222480389
2	Naa40									Naa40_exon_chr1:222489579	0.0686	0.0	-0.0686	NA	1	NA	NA	NA	NA	Naa40_exon_chr1:222489579
3	Naa40									Naa40_intron_chr1:222488561	0.1233	0.0815	-0.0418	NA	3	NA	NA	-0.3979	NA	Naa40_intron_chr1:222488561
1	Mark2	20.4707	11.7166	-0.8113	1.0	NC	No	No	2	Mark2_exon_chr1:222533406	0.0	0.4763	0.4763	NA	1	NA	NA	NA	NA	Mark2_exon_chr1:222533406
2	Mark2									Mark2_intron_chr1:222590031	1.0	0.5237	-0.4763	NA	1	NA	NA	NA	NA	Mark2_intron_chr1:222590031
1	Spindoc	17.7614	38.3943	1.1175	0.2941	NC	No	No	1	Spindoc_exon_chr1:222608114	1.0	1.0	0.0	NA	1	NA	NA	NA	NA	Spindoc_exon_chr1:222608114
1	Rtn3	735.1532	962.1203	0.3901	0.2452	NC	No	Yes	2	Rtn3_exon_chr1:222679306	0.9614	0.942	-0.0195	NA	5	0.6236	0.1094	-0.5143	Shortening	Rtn3_exon_chr1:222679306
2	Rtn3									Rtn3_intron_chr1:222733910	0.0281	0.056	0.0279	NA	5	NA	NA	-0.2803	Both	Rtn3_intron_chr1:222733910
1	Slc22a24	374.8781	307.0709	-0.2858	0.5043	NC	No	No	1	Slc22a24_intron_chr1:223499150	1.0	1.0	0.0	NA	1	NA	NA	NA	NA	Slc22a24_intron_chr1:223499150
1	Slc22a25	36.3125	28.3499	-0.3549	0.9029	NC	No	No	1	Slc22a25_intron_chr1:224693978	1.0	1.0	0.0	NA	1	NA	NA	NA	NA	Slc22a25_intron_chr1:224693978
1	Slc3a2	157.7567	253.3995	0.6812	0.0999	UP	No	No	1	Slc3a2_exon_chr1:224907102	1.0	1.0	0.0	NA	1	NA	NA	NA	NA	Slc3a2_exon_chr1:224907102
1	Tmem179b	148.0816	100.6946	-0.5501	0.426	NC	No	No	1	Tmem179b_exon_chr1:224972567	1.0	1.0	0.0	NA	2	0.1619	0.376	0.2141	NA	Tmem179b_exon_chr1:224972567
1	Taf6l	28.1468	21.3343	-0.4014	1.0	NC	No	No	1	Taf6l_exon_chr1:224975036	1.0	1.0	0.0	NA	1	NA	NA	NA	NA	Taf6l_exon_chr1:224975036
1	Polr2g	242.4497	211.7742	-0.1909	0.7009	NC	No	No	1	Polr2g_exon_chr1:224991534	1.0	1.0	0.0	NA	2	0.9652	0.8742	-0.091	NA	Polr2g_exon_chr1:224991534
1	Ttc9c	83.6743	131.9451	0.6629	0.4581	NC	No	No	1	Ttc9c_exon_chr1:225006357	1.0	1.0	0.0	NA	4	0.7032	0.4566	-0.2466	NA	Ttc9c_exon_chr1:225006357
1	Uqcc3	604.9954	338.2382	-0.8415	0.0033	DOWN	No	Yes	1	Uqcc3_exon_chr1:225076808	1.0	1.0	0.0	NA	4	0.2334	0.3855	0.1521	Lengthening	Uqcc3_exon_chr1:225076808
1	Rom1	40.4694	61.5121	0.5827	0.6817	NC	No	No	1	Rom1_exon_chr1:225127226	1.0	1.0	0.0	NA	1	NA	NA	NA	NA	Rom1_exon_chr1:225127226
1	Asrgl1	85.5036	98.1765	0.206	0.9221	NC	No	No	1	Asrgl1_exon_chr1:225310016	1.0	1.0	0.0	NA	1	NA	NA	NA	NA	Asrgl1_exon_chr1:225310016
1	Fads2	68.3223	174.8254	1.3525	0.1341	NC	No	No	2	Fads2_exon_chr1:225906964	1.0	0.9543	-0.0457	NA	1	NA	NA	NA	NA	Fads2_exon_chr1:225906964
2	Fads2									Fads2_intron_chr1:226132713	0.0	0.0457	0.0457	NA	1	NA	NA	NA	NA	Fads2_intron_chr1:226132713
1	Incenp	154.7439	212.1171	0.4563	0.4695	NC	No	No	6	Incenp_exon_chr1:225926690	0.3225	0.5638	0.2413	NA	2	0.1136	0.1872	0.0735	NA	Incenp_exon_chr1:225926690
2	Incenp									Incenp_exon_chr1:225928696	0.061	0.0034	-0.0576	NA	1	NA	NA	NA	NA	Incenp_exon_chr1:225928696
3	Incenp									Incenp_exon_chr1:225928944	0.2513	0.2219	-0.0294	NA	1	NA	NA	NA	NA	Incenp_exon_chr1:225928944
4	Incenp									Incenp_exon_chr1:225930331	0.2469	0.1213	-0.1256	NA	1	NA	NA	NA	NA	Incenp_exon_chr1:225930331
5	Incenp									Incenp_exon_chr1:225931397	0.0348	0.013	-0.0218	NA	1	NA	NA	NA	NA	Incenp_exon_chr1:225931397
6	Incenp									Incenp_exon_chr1:225931857	0.0835	0.0766	-0.0069	NA	1	NA	NA	NA	NA	Incenp_exon_chr1:225931857
1	Fen1	86.1647	46.6891	-0.8831	0.3367	NC	No	No	1	Fen1_exon_chr1:226253452	1.0	1.0	0.0	NA	2	1.0	0.7119	-0.2881	NA	Fen1_exon_chr1:226253452
1	Myrf	105.299	112.1682	0.0995	0.9641	NC	No	No	2	Myrf_exon_chr1:226262740	1.0	0.9732	-0.0268	NA	2	0.9577	0.8971	-0.0606	NA	Myrf_exon_chr1:226262740
2	Myrf									Myrf_intron_chr1:226292434	0.0	0.0268	0.0268	NA	1	NA	NA	NA	NA	Myrf_intron_chr1:226292434
1	Dagla	11.7337	11.4797	-0.0581	1.0	NC	No	No	1	Dagla_exon_chr1:226300315	1.0	1.0	0.0	NA	2	NA	NA	-0.0728	NA	Dagla_exon_chr1:226300315
1	Sdhaf2	46.7236	78.7752	0.7571	0.6046	NC	No	No	2	Sdhaf2_exon_chr1:226548970	0.8813	0.9562	0.075	NA	6	0.7237	0.9416	0.2179	NA	Sdhaf2_exon_chr1:226548970
2	Sdhaf2									Sdhaf2_intron_chr1:226566337	0.1187	0.0438	-0.075	NA	2	NA	NA	0.179	NA	Sdhaf2_intron_chr1:226566337
1	Tmem216	58.8327	38.1229	-0.6272	0.521	NC	No	No	1	Tmem216_exon_chr1:226602084	1.0	1.0	0.0	NA	2	0.2914	0.1151	-0.1762	NA	Tmem216_exon_chr1:226602084
1	Tmem138	40.7176	86.1549	1.0996	0.2532	NC	No	No	1	Tmem138_exon_chr1:226624609	1.0	1.0	0.0	NA	2	0.9926	0.8583	-0.1343	NA	Tmem138_exon_chr1:226624609
1	Tkfc	20.2187	70.5884	1.807	0.0197	UP	No	No	1	Tkfc_exon_chr1:226644714	1.0	1.0	0.0	NA	1	NA	NA	NA	NA	Tkfc_exon_chr1:226644714
1	Tmem132a	828.8653	1181.1828	0.5099	0.1449	NC	No	No	1	Tmem132a_exon_chr1:226913863	1.0	1.0	0.0	NA	1	NA	NA	NA	NA	Tmem132a_exon_chr1:226913863
1	Tmem109	424.6702	318.4642	-0.412	0.3631	NC	No	No	2	Tmem109_exon_chr1:226926595	0.987	1.0	0.013	NA	2	0.9868	0.9833	-0.0035	NA	Tmem109_exon_chr1:226926595
2	Tmem109									Tmem109_intron_chr1:226935626	0.013	0.0	-0.013	NA	2	NA	NA	-0.1516	NA	Tmem109_intron_chr1:226935626
1	Ccdc86	46.6438	8.7341	-2.4446	0.514	NC	No	No	2	Ccdc86_exon_chr1:226996554	0.9582	1.0	0.0418	NA	1	NA	NA	NA	NA	Ccdc86_exon_chr1:226996554
2	Ccdc86									Ccdc86_exon_chr1:227002016	0.0418	0.0	-0.0418	NA	1	NA	NA	NA	NA	Ccdc86_exon_chr1:227002016
1	Stx3	15.0948	10.9181	-0.4625	1.0	NC	No	No	5	Stx3_exon_chr1:228151998	0.3671	0.3774	0.0103	NA	1	NA	NA	NA	NA	Stx3_exon_chr1:228151998
2	Stx3									Stx3_exon_chr1:228158453	0.194	0.0648	-0.1293	NA	1	NA	NA	NA	NA	Stx3_exon_chr1:228158453
3	Stx3									Stx3_intron_chr1:228158344	0.0	0.2587	0.2587	NA	1	NA	NA	NA	NA	Stx3_intron_chr1:228158344
4	Stx3									Stx3_intron_chr1:228159957	0.1935	0.0	-0.1935	NA	1	NA	NA	NA	NA	Stx3_intron_chr1:228159957
5	Stx3									Stx3_intron_chr1:228161354	0.2454	0.2991	0.0537	NA	2	NA	NA	-0.277	NA	Stx3_intron_chr1:228161354
1	Dtx4	4.0212	46.2977	3.5826	0.4721	NC	No	No	1	Dtx4_exon_chr1:228733415	1.0	1.0	0.0	NA	1	NA	NA	NA	NA	Dtx4_exon_chr1:228733415
1	Cntf	5.6047	7.3346	0.4001	1.0	NC	No	No	1	Cntf_exon_chr1:229599911	1.0	1.0	0.0	NA	3	NA	NA	0.0455	NA	Cntf_exon_chr1:229599911
1	Zfp91	2263.765	1141.3575	-0.9895	0.0066	DOWN	No	Yes	4	Zfp91_exon_chr1:229606152	0.3173	0.3562	0.039	NA	8	0.3684	0.1257	-0.2427	Both	Zfp91_exon_chr1:229606152
2	Zfp91									Zfp91_exon_chr1:229611564	0.0201	0.0265	0.0064	NA	1	NA	NA	NA	NA	Zfp91_exon_chr1:229611564
3	Zfp91									Zfp91_exon_chr1:229613998	0.6413	0.5949	-0.0464	NA	1	NA	NA	NA	NA	Zfp91_exon_chr1:229613998
4	Zfp91									Zfp91_exon_chr1:229639187	0.0107	0.0097	-0.001	NA	1	NA	NA	NA	NA	Zfp91_exon_chr1:229639187
1	Tle4	39.1275	22.1552	-0.8383	1.0	NC	No	Yes	3	Tle4_exon_chr1:231396292	0.4497	0.4817	0.032	NA	4	NA	NA	-0.9003	Shortening	Tle4_exon_chr1:231396292
2	Tle4									Tle4_intron_chr1:231457045	0.4161	0.3135	-0.1026	NA	1	NA	NA	NA	NA	Tle4_intron_chr1:231457045
3	Tle4									Tle4_intron_chr1:231498134	0.1268	0.2048	0.0781	NA	2	NA	NA	0.0666	NA	Tle4_intron_chr1:231498134
1	Psat1	156.0312	528.8243	1.7641	0.0	UP	No	Yes	2	Psat1_exon_chr1:233125024	0.9881	0.9662	-0.0219	NA	6	0.9751	0.8833	-0.0918	Shortening	Psat1_exon_chr1:233125024
2	Psat1									Psat1_intron_chr1:233129687	0.0119	0.0338	0.0219	NA	1	NA	NA	NA	NA	Psat1_intron_chr1:233129687
1	Cep78	56.3647	33.06	-0.7651	0.5024	NC	No	No	3	Cep78_exon_chr1:233187615	0.6692	0.8015	0.1323	NA	2	0.7691	0.6775	-0.0916	NA	Cep78_exon_chr1:233187615
2	Cep78									Cep78_exon_chr1:233203970	0.2872	0.0993	-0.188	NA	1	NA	NA	NA	NA	Cep78_exon_chr1:233203970
3	Cep78									Cep78_intron_chr1:233214490	0.0435	0.0992	0.0557	NA	1	NA	NA	NA	NA	Cep78_intron_chr1:233214490
1	LOC499331	85.2752	30.6781	-1.4873	0.0099	DOWN	No	Yes	1	LOC499331_exon_chr1:234667136	1.0	1.0	0.0	NA	4	0.8516	0.7832	-0.0684	Shortening	LOC499331_exon_chr1:234667136
1	Carnmt1	43.3517	135.9283	1.6522	0.0545	UP	No	No	2	Carnmt1_exon_chr1:234677992	0.8015	0.8787	0.0772	NA	3	0.1457	0.1816	0.0358	NA	Carnmt1_exon_chr1:234677992
2	Carnmt1									Carnmt1_intron_chr1:234698966	0.1985	0.1161	-0.0824	NA	1	NA	NA	NA	NA	Carnmt1_intron_chr1:234698966
1	Nmrk1	2.5132	0.7589	-1.7759	1.0	NC	No	No	1	Nmrk1_exon_chr1:234722891	1.0	1.0	0.0	NA	1	NA	NA	NA	NA	Nmrk1_exon_chr1:234722891
1	Vps13a	72.0919	77.2249	0.0964	0.9642	NC	No	No	10	Vps13a_exon_chr1:235354052	0.3428	0.8669	0.5242	NA	3	0.3004	0.2133	-0.0871	NA	Vps13a_exon_chr1:235354052
2	Vps13a									Vps13a_exon_chr1:235356798	0.0	0.0232	0.0232	NA	1	NA	NA	NA	NA	Vps13a_exon_chr1:235356798
3	Vps13a									Vps13a_exon_chr1:235395737	0.0324	0.0	-0.0324	NA	1	NA	NA	NA	NA	Vps13a_exon_chr1:235395737
4	Vps13a									Vps13a_exon_chr1:235670651	0.007	0.0649	0.0579	NA	1	NA	NA	NA	NA	Vps13a_exon_chr1:235670651
5	Vps13a									Vps13a_exon_chr1:235673337	0.0678	0.0	-0.0678	NA	1	NA	NA	NA	NA	Vps13a_exon_chr1:235673337
6	Vps13a									Vps13a_exon_chr1:235720881	0.0474	0.0	-0.0474	NA	1	NA	NA	NA	NA	Vps13a_exon_chr1:235720881
7	Vps13a									Vps13a_exon_chr1:235793978	0.0678	0.0186	-0.0492	NA	1	NA	NA	NA	NA	Vps13a_exon_chr1:235793978
8	Vps13a									Vps13a_intron_chr1:235375552	0.3535	0.0263	-0.3271	Down	1	NA	NA	NA	NA	Vps13a_intron_chr1:235375552
9	Vps13a									Vps13a_intron_chr1:235656005	0.0407	0.0	-0.0407	NA	1	NA	NA	NA	NA	Vps13a_intron_chr1:235656005
10	Vps13a									Vps13a_intron_chr1:235732978	0.0407	0.0	-0.0407	NA	1	NA	NA	NA	NA	Vps13a_intron_chr1:235732978
1	Rfk	70.1584	305.6809	2.123	0.0	UP	No	Yes	1	Rfk_exon_chr1:236495836	1.0	1.0	0.0	NA	6	0.7709	0.2613	-0.5096	Shortening	Rfk_exon_chr1:236495836
1	Anxa1	1542.0026	2194.2014	0.5097	0.1	NC	No	No	3	Anxa1_exon_chr1:237894326	0.9027	0.9324	0.0297	NA	1	NA	NA	NA	NA	Anxa1_exon_chr1:237894326
2	Anxa1									Anxa1_intron_chr1:237899388	0.0492	0.0329	-0.0163	NA	1	NA	NA	NA	NA	Anxa1_intron_chr1:237899388
3	Anxa1									Anxa1_intron_chr1:237909956	0.0421	0.0312	-0.0109	NA	2	0.0834	0.0413	-0.0421	NA	Anxa1_intron_chr1:237909956
1	RGD1359158	160.5938	44.9728	-1.8443	0.0022	DOWN	No	No	3	RGD1359158_exon_chr1:239208854	0.4591	0.6834	0.2243	NA	1	NA	NA	NA	NA	RGD1359158_exon_chr1:239208854
2	RGD1359158									RGD1359158_intron_chr1:239223082	0.3855	0.1232	-0.2623	NA	6	NA	NA	-0.0962	NA	RGD1359158_intron_chr1:239223082
3	RGD1359158									RGD1359158_intron_chr1:239265856	0.1554	0.1935	0.038	NA	7	NA	NA	0.1121	NA	RGD1359158_intron_chr1:239265856
1	Smc5	597.0423	547.9836	-0.1251	0.7779	NC	No	Yes	7	Smc5_exon_chr1:240980760	0.1519	0.5941	0.4422	Up	8	0.4484	0.0048	-0.4436	Both	Smc5_exon_chr1:240980760
2	Smc5									Smc5_exon_chr1:241023581	0.5733	0.2807	-0.2926	Down	1	NA	NA	NA	NA	Smc5_exon_chr1:241023581
3	Smc5									Smc5_exon_chr1:241029175	0.0286	0.0072	-0.0214	NA	1	NA	NA	NA	NA	Smc5_exon_chr1:241029175
4	Smc5									Smc5_exon_chr1:241031984	0.052	0.0281	-0.0239	NA	1	NA	NA	NA	NA	Smc5_exon_chr1:241031984
5	Smc5									Smc5_exon_chr1:241033784	0.1205	0.0266	-0.0939	NA	2	NA	NA	-0.0228	NA	Smc5_exon_chr1:241033784
6	Smc5									Smc5_exon_chr1:241037947	0.0292	0.0111	-0.0181	NA	2	NA	NA	0.1778	NA	Smc5_exon_chr1:241037947
7	Smc5									Smc5_intron_chr1:241045999	0.0348	0.0436	0.0088	NA	3	NA	NA	0.5967	NA	Smc5_intron_chr1:241045999
1	Tjp2	241.2162	246.7868	0.0343	0.9363	NC	No	Yes	2	Tjp2_exon_chr1:241946870	0.8341	0.9054	0.0713	NA	3	0.5993	0.6063	0.0069	Both	Tjp2_exon_chr1:241946870
2	Tjp2									Tjp2_intron_chr1:242052234	0.1659	0.0859	-0.08	NA	2	0.5565	0.2422	-0.3143	NA	Tjp2_intron_chr1:242052234
1	Fxn	185.6495	169.2399	-0.1368	0.7797	NC	No	No	1	Fxn_exon_chr1:242124293	1.0	1.0	0.0	NA	4	0.1669	0.1879	0.021	NA	Fxn_exon_chr1:242124293
1	Fam122a	38.5322	21.1336	-0.8823	0.3841	NC	No	No	1	Fam122a_exon_chr1:242373764	1.0	1.0	0.0	NA	4	NA	NA	0.0452	NA	Fam122a_exon_chr1:242373764
1	Pgm5	126.7908	156.9598	0.3035	0.587	NC	No	No	3	Pgm5_exon_chr1:242582731	0.7528	0.8724	0.1196	NA	3	0.8462	0.8308	-0.0154	NA	Pgm5_exon_chr1:242582731
2	Pgm5									Pgm5_intron_chr1:242627494	0.0719	0.0249	-0.047	NA	4	NA	NA	-0.2728	NA	Pgm5_intron_chr1:242627494
3	Pgm5									Pgm5_intron_chr1:242716556	0.1661	0.0981	-0.068	NA	6	NA	NA	-0.1861	NA	Pgm5_intron_chr1:242716556
1	Cbwd1	156.2318	179.8257	0.2	0.8661	NC	No	No	5	Cbwd1_exon_chr1:242820435	0.0322	0.2241	0.1919	NA	1	NA	NA	NA	NA	Cbwd1_exon_chr1:242820435
2	Cbwd1									Cbwd1_exon_chr1:242822267	0.0336	0.0	-0.0336	NA	1	NA	NA	NA	NA	Cbwd1_exon_chr1:242822267
3	Cbwd1									Cbwd1_exon_chr1:242861717	0.8825	0.7538	-0.1287	NA	1	NA	NA	NA	NA	Cbwd1_exon_chr1:242861717
4	Cbwd1									Cbwd1_intron_chr1:242847523	0.005	0.02	0.015	NA	1	NA	NA	NA	NA	Cbwd1_intron_chr1:242847523
5	Cbwd1									Cbwd1_intron_chr1:242861555	0.0467	0.002	-0.0447	NA	1	NA	NA	NA	NA	Cbwd1_intron_chr1:242861555
1	Pum3	755.7042	702.658	-0.108	0.7422	NC	No	No	5	Pum3_exon_chr1:245476661	0.2641	0.4746	0.2105	Up	1	NA	NA	NA	NA	Pum3_exon_chr1:245476661
2	Pum3									Pum3_exon_chr1:245510774	0.0555	0.0395	-0.0161	NA	2	0.1512	0.1092	-0.042	NA	Pum3_exon_chr1:245510774
3	Pum3									Pum3_exon_chr1:245511486	0.5527	0.4037	-0.1491	NA	2	0.1744	0.2798	0.1054	NA	Pum3_exon_chr1:245511486
4	Pum3									Pum3_exon_chr1:245514262	0.1099	0.0624	-0.0475	NA	2	0.1723	0.0692	-0.1031	NA	Pum3_exon_chr1:245514262
5	Pum3									Pum3_intron_chr1:245509532	0.0094	0.0184	0.009	NA	1	NA	NA	NA	NA	Pum3_intron_chr1:245509532
1	Rfx3	17.5432	21.138	0.2791	1.0	NC	No	No	4	Rfx3_exon_chr1:245860161	0.0	0.3721	0.3721	NA	2	NA	NA	0.3187	NA	Rfx3_exon_chr1:245860161
2	Rfx3									Rfx3_intron_chr1:245877466	0.1144	0.2634	0.149	NA	1	NA	NA	NA	NA	Rfx3_intron_chr1:245877466
3	Rfx3									Rfx3_intron_chr1:245926332	0.2002	0.0	-0.2002	NA	1	NA	NA	NA	NA	Rfx3_intron_chr1:245926332
4	Rfx3									Rfx3_intron_chr1:246110493	0.6853	0.3645	-0.3209	NA	2	NA	NA	0.4991	NA	Rfx3_intron_chr1:246110493
1	Ak3	388.9283	361.5084	-0.1063	0.7883	NC	No	Yes	3	Ak3_exon_chr1:247144926	0.1673	0.4389	0.2717	Up	3	0.831	0.4518	-0.3791	Shortening	Ak3_exon_chr1:247144926
2	Ak3									Ak3_intron_chr1:247148260	0.0008	0.0575	0.0568	NA	2	NA	NA	0.593	NA	Ak3_intron_chr1:247148260
3	Ak3									Ak3_intron_chr1:247169486	0.8269	0.5036	-0.3233	NA	7	0.0025	0.018	0.0156	NA	Ak3_intron_chr1:247169486
1	Plgrkt	50.0757	71.8532	0.5271	0.6522	NC	No	Yes	1	Plgrkt_exon_chr1:247502683	1.0	1.0	0.0	NA	2	0.8243	0.5367	-0.2875	Shortening	Plgrkt_exon_chr1:247502683
1	Ermp1	159.9335	216.4784	0.4361	0.545	NC	No	Yes	3	Ermp1_exon_chr1:247790120	0.9581	0.9541	-0.004	NA	9	0.8418	0.6086	-0.2333	Both	Ermp1_exon_chr1:247790120
2	Ermp1									Ermp1_exon_chr1:247805907	0.0	0.0197	0.0197	NA	1	NA	NA	NA	NA	Ermp1_exon_chr1:247805907
3	Ermp1									Ermp1_intron_chr1:247799349	0.0419	0.0263	-0.0157	NA	1	NA	NA	NA	NA	Ermp1_intron_chr1:247799349
1	Ranbp6	50.1344	52.0498	0.0668	1.0	NC	No	No	1	Ranbp6_exon_chr1:247985186	1.0	1.0	0.0	NA	3	0.8804	0.9542	0.0738	NA	Ranbp6_exon_chr1:247985186
1	Dkk1	59.1412	32.4736	-0.8657	0.3528	NC	No	Yes	1	Dkk1_intron_chr1:248952645	1.0	1.0	0.0	NA	5	0.803	0.1686	-0.6344	Both	Dkk1_intron_chr1:248952645
1	Prkg1	374.6346	373.7573	-0.0047	0.9705	NC	No	No	6	Prkg1_intron_chr1:249091102	0.0138	0.0039	-0.0099	NA	5	NA	NA	-0.2086	NA	Prkg1_intron_chr1:249091102
2	Prkg1									Prkg1_intron_chr1:249367008	0.0749	0.1713	0.0965	NA	8	0.1366	0.1362	-0.0004	NA	Prkg1_intron_chr1:249367008
3	Prkg1									Prkg1_intron_chr1:249463325	0.1127	0.0712	-0.0414	NA	9	0.2959	0.3176	0.0217	NA	Prkg1_intron_chr1:249463325
4	Prkg1									Prkg1_intron_chr1:249812953	0.3079	0.2935	-0.0144	NA	33	0.5322	0.5282	-0.004	NA	Prkg1_intron_chr1:249812953
5	Prkg1									Prkg1_intron_chr1:250105796	0.2479	0.2443	-0.0036	NA	20	0.3558	0.3625	0.0067	NA	Prkg1_intron_chr1:250105796
6	Prkg1									Prkg1_intron_chr1:250300686	0.2367	0.2128	-0.0239	NA	13	0.0909	0.0685	-0.0224	NA	Prkg1_intron_chr1:250300686
1	Asah2	9.3564	17.3526	0.8907	1.0	NC	No	No	1	Asah2_exon_chr1:250559738	1.0	1.0	0.0	NA	2	NA	NA	-0.6665	NA	Asah2_exon_chr1:250559738
1	Sgms1	19.8022	69.9551	1.7781	0.0908	UP	No	Yes	4	Sgms1_exon_chr1:250692834	0.2476	0.8427	0.5951	Up	2	NA	NA	0.2234	Lengthening	Sgms1_exon_chr1:250692834
2	Sgms1									Sgms1_intron_chr1:250712451	0.0586	0.0964	0.0378	NA	3	NA	NA	0.1504	NA	Sgms1_intron_chr1:250712451
3	Sgms1									Sgms1_intron_chr1:250785011	0.6645	0.0609	-0.6036	NA	2	NA	NA	-0.3889	NA	Sgms1_intron_chr1:250785011
4	Sgms1									Sgms1_intron_chr1:250951399	0.0293	0.0	-0.0293	NA	1	NA	NA	NA	NA	Sgms1_intron_chr1:250951399
1	Atad1	10.9957	81.7326	2.9069	0.6962	NC	No	No	1	Atad1_exon_chr1:251237275	1.0	1.0	0.0	NA	4	NA	NA	-0.5991	NA	Atad1_exon_chr1:251237275
1	Rnls	36.8387	38.8659	0.0814	1.0	NC	No	No	3	Rnls_intron_chr1:251832434	0.0265	0.0531	0.0266	NA	1	NA	NA	NA	NA	Rnls_intron_chr1:251832434
2	Rnls									Rnls_intron_chr1:251901988	0.2539	0.38	0.1261	NA	2	NA	NA	0.4676	NA	Rnls_intron_chr1:251901988
3	Rnls									Rnls_intron_chr1:252098999	0.7196	0.5669	-0.1527	NA	4	0.5618	0.2667	-0.295	NA	Rnls_intron_chr1:252098999
1	Acta2	13087.9673	18828.4333	0.5247	0.0898	NC	No	No	1	Acta2_exon_chr1:252537961	1.0	1.0	0.0	NA	1	NA	NA	NA	NA	Acta2_exon_chr1:252537961
1	Lipa	110.2699	274.0266	1.3086	0.0001	UP	No	No	1	Lipa_exon_chr1:252818493	1.0	1.0	0.0	NA	1	NA	NA	NA	NA	Lipa_exon_chr1:252818493
1	Pank1	6.0319	14.7208	1.2512	1.0	NC	No	No	1	Pank1_exon_chr1:253120578	1.0	1.0	0.0	NA	2	NA	NA	-0.1797	NA	Pank1_exon_chr1:253120578
1	Ankrd1	59733.1019	38565.4005	-0.6313	0.0476	DOWN	No	No	3	Ankrd1_exon_chr1:254727832	0.3143	0.3919	0.0776	NA	7	0.9982	0.9854	-0.0128	NA	Ankrd1_exon_chr1:254727832
2	Ankrd1									Ankrd1_exon_chr1:254733988	0.6438	0.5821	-0.0617	NA	1	NA	NA	NA	NA	Ankrd1_exon_chr1:254733988
3	Ankrd1									Ankrd1_exon_chr1:254735088	0.0316	0.0154	-0.0162	NA	1	NA	NA	NA	NA	Ankrd1_exon_chr1:254735088
1	Ppp1r3c	6.0318	15.4709	1.3927	1.0	NC	No	Yes	1	Ppp1r3c_exon_chr1:255374478	1.0	1.0	0.0	NA	3	NA	NA	0.609	Lengthening	Ppp1r3c_exon_chr1:255374478
1	Fgfbp3	11.5784	3.9629	-1.5422	1.0	NC	No	No	1	Fgfbp3_exon_chr1:255556698	1.0	1.0	0.0	NA	3	NA	NA	-0.2099	NA	Fgfbp3_exon_chr1:255556698
1	Ide	210.1912	341.5883	0.6998	0.2162	NC	No	No	2	Ide_exon_chr1:255916608	0.864	0.9516	0.0875	NA	2	0.2224	0.2078	-0.0147	NA	Ide_exon_chr1:255916608
2	Ide									Ide_exon_chr1:255935277	0.136	0.0484	-0.0875	NA	1	NA	NA	NA	NA	Ide_exon_chr1:255935277
1	Myof	1017.3339	1064.8179	0.067	0.8582	NC	No	Yes	10	Myof_exon_chr1:256586452	0.5691	0.526	-0.0431	NA	3	0.8971	0.7814	-0.1157	Both	Myof_exon_chr1:256586452
2	Myof									Myof_exon_chr1:256607983	0.0115	0.0058	-0.0058	NA	1	NA	NA	NA	NA	Myof_exon_chr1:256607983
3	Myof									Myof_exon_chr1:256618047	0.0116	0.0009	-0.0107	NA	1	NA	NA	NA	NA	Myof_exon_chr1:256618047
4	Myof									Myof_exon_chr1:256667078	0.0176	0.0087	-0.0089	NA	1	NA	NA	NA	NA	Myof_exon_chr1:256667078
5	Myof									Myof_exon_chr1:256734727	0.2332	0.2557	0.0226	NA	1	NA	NA	NA	NA	Myof_exon_chr1:256734727
6	Myof									Myof_intron_chr1:256602656	0.005	0.0192	0.0142	NA	1	NA	NA	NA	NA	Myof_intron_chr1:256602656
7	Myof									Myof_intron_chr1:256659245	0.0511	0.0267	-0.0244	NA	1	NA	NA	NA	NA	Myof_intron_chr1:256659245
8	Myof									Myof_intron_chr1:256670744	0.0476	0.0524	0.0048	NA	3	0.8949	0.9785	0.0837	NA	Myof_intron_chr1:256670744
9	Myof									Myof_intron_chr1:256687838	0.0026	0.0545	0.0519	NA	5	NA	NA	0.1946	NA	Myof_intron_chr1:256687838
10	Myof									Myof_intron_chr1:256734553	0.0208	0.0219	0.0011	NA	10	NA	NA	-0.0761	NA	Myof_intron_chr1:256734553
1	Fra10ac1	120.0384	141.4134	0.2252	0.7956	NC	No	No	8	Fra10ac1_exon_chr1:256882012	0.1768	0.3805	0.2037	NA	1	NA	NA	NA	NA	Fra10ac1_exon_chr1:256882012
2	Fra10ac1									Fra10ac1_exon_chr1:256899692	0.1228	0.0438	-0.079	NA	1	NA	NA	NA	NA	Fra10ac1_exon_chr1:256899692
3	Fra10ac1									Fra10ac1_exon_chr1:256903770	0.1176	0.1574	0.0399	NA	1	NA	NA	NA	NA	Fra10ac1_exon_chr1:256903770
4	Fra10ac1									Fra10ac1_exon_chr1:256906015	0.0406	0.0	-0.0406	NA	1	NA	NA	NA	NA	Fra10ac1_exon_chr1:256906015
5	Fra10ac1									Fra10ac1_exon_chr1:256911383	0.4376	0.2191	-0.2185	NA	1	NA	NA	NA	NA	Fra10ac1_exon_chr1:256911383
6	Fra10ac1									Fra10ac1_intron_chr1:256894194	0.0194	0.0177	-0.0017	NA	1	NA	NA	NA	NA	Fra10ac1_intron_chr1:256894194
7	Fra10ac1									Fra10ac1_intron_chr1:256897230	0.0121	0.0662	0.0541	NA	1	NA	NA	NA	NA	Fra10ac1_intron_chr1:256897230
8	Fra10ac1									Fra10ac1_intron_chr1:256908843	0.0731	0.1152	0.0421	NA	1	NA	NA	NA	NA	Fra10ac1_intron_chr1:256908843
1	Noc3l	288.0981	225.072	-0.3515	0.4068	NC	No	No	5	Noc3l_exon_chr1:257470103	0.0747	0.2834	0.2087	NA	1	NA	NA	NA	NA	Noc3l_exon_chr1:257470103
2	Noc3l									Noc3l_exon_chr1:257470744	0.14	0.2369	0.0969	NA	1	NA	NA	NA	NA	Noc3l_exon_chr1:257470744
3	Noc3l									Noc3l_exon_chr1:257483633	0.154	0.0678	-0.0862	NA	2	NA	NA	0.2375	NA	Noc3l_exon_chr1:257483633
4	Noc3l									Noc3l_exon_chr1:257491755	0.0112	0.0	-0.0112	NA	1	NA	NA	NA	NA	Noc3l_exon_chr1:257491755
5	Noc3l									Noc3l_exon_chr1:257497738	0.6131	0.4027	-0.2104	NA	2	0.135	0.141	0.006	NA	Noc3l_exon_chr1:257497738
1	Aldh18a1	258.2079	381.9828	0.5677	0.1829	NC	No	No	7	Aldh18a1_exon_chr1:259058499	0.4712	0.4771	0.0059	NA	1	NA	NA	NA	NA	Aldh18a1_exon_chr1:259058499
2	Aldh18a1									Aldh18a1_exon_chr1:259642765	0.4731	0.4819	0.0088	NA	1	NA	NA	NA	NA	Aldh18a1_exon_chr1:259642765
3	Aldh18a1									Aldh18a1_intron_chr1:259063428	0.0056	0.0196	0.014	NA	2	NA	NA	0.2048	NA	Aldh18a1_intron_chr1:259063428
4	Aldh18a1									Aldh18a1_intron_chr1:259075694	0.0147	0.0009	-0.0138	NA	1	NA	NA	NA	NA	Aldh18a1_intron_chr1:259075694
5	Aldh18a1									Aldh18a1_intron_chr1:259086849	0.0151	0.0	-0.0151	NA	1	NA	NA	NA	NA	Aldh18a1_intron_chr1:259086849
6	Aldh18a1									Aldh18a1_intron_chr1:259647694	0.0056	0.0196	0.014	NA	2	NA	NA	0.2048	NA	Aldh18a1_intron_chr1:259647694
7	Aldh18a1									Aldh18a1_intron_chr1:259660487	0.0147	0.0009	-0.0138	NA	1	NA	NA	NA	NA	Aldh18a1_intron_chr1:259660487
1	Pdlim1	511.8861	511.3751	0.0023	0.9363	NC	No	No	1	Pdlim1_exon_chr1:259308853	1.0	1.0	0.0	NA	1	NA	NA	NA	NA	Pdlim1_exon_chr1:259308853
1	Mms19	116.3754	143.7303	0.2964	0.7797	NC	No	No	3	Mms19_exon_chr1:261192027	0.8552	0.9116	0.0563	NA	1	NA	NA	NA	NA	Mms19_exon_chr1:261192027
2	Mms19									Mms19_intron_chr1:261213169	0.0312	0.0	-0.0312	NA	1	NA	NA	NA	NA	Mms19_intron_chr1:261213169
3	Mms19									Mms19_intron_chr1:261228909	0.1136	0.0884	-0.0251	NA	2	NA	NA	-0.2264	NA	Mms19_intron_chr1:261228909
1	Morn4	5.0438	35.7788	2.73	0.2411	NC	No	No	1	Morn4_exon_chr1:261324320	1.0	1.0	0.0	NA	1	NA	NA	NA	NA	Morn4_exon_chr1:261324320
1	Avpi1	912.3244	439.1065	-1.0591	0.0	DOWN	No	Yes	1	Avpi1_exon_chr1:261366161	1.0	1.0	0.0	NA	2	0.7319	0.553	-0.1789	Shortening	Avpi1_exon_chr1:261366161
1	Loxl4	63.7515	44.3462	-0.517	0.6741	NC	No	No	1	Loxl4_exon_chr1:261836634	1.0	1.0	0.0	NA	3	0.8559	0.9929	0.1371	NA	Loxl4_exon_chr1:261836634
1	Hps1	114.4919	81.9498	-0.491	0.5501	NC	No	No	3	Hps1_exon_chr1:261989794	0.9567	0.923	-0.0338	NA	1	NA	NA	NA	NA	Hps1_exon_chr1:261989794
2	Hps1									Hps1_intron_chr1:261991718	0.0204	0.077	0.0567	NA	1	NA	NA	NA	NA	Hps1_intron_chr1:261991718
3	Hps1									Hps1_intron_chr1:261993737	0.0229	0.0	-0.0229	NA	1	NA	NA	NA	NA	Hps1_intron_chr1:261993737
1	Hpse2	66.5643	208.5094	1.6387	0.007	UP	No	No	3	Hpse2_intron_chr1:262625182	0.0437	0.0213	-0.0225	NA	2	NA	NA	0.1667	NA	Hpse2_intron_chr1:262625182
2	Hpse2									Hpse2_intron_chr1:262699573	0.0437	0.0	-0.0437	NA	1	NA	NA	NA	NA	Hpse2_intron_chr1:262699573
3	Hpse2									Hpse2_intron_chr1:263131261	0.9126	0.9787	0.0662	NA	8	0.9208	0.5005	-0.4203	NA	Hpse2_intron_chr1:263131261
1	Got1	385.1032	360.9534	-0.0952	0.8265	NC	No	No	2	Got1_exon_chr1:263247058	0.9856	0.9992	0.0136	NA	3	0.4173	0.2453	-0.172	NA	Got1_exon_chr1:263247058
2	Got1									Got1_intron_chr1:263252613	0.0144	0.0008	-0.0136	NA	1	NA	NA	NA	NA	Got1_intron_chr1:263252613
1	Slc25a28	95.0844	100.4115	0.0664	0.966	NC	No	No	1	Slc25a28_exon_chr1:263420877	1.0	1.0	0.0	NA	2	0.9694	1.0	0.0306	NA	Slc25a28_exon_chr1:263420877
1	Cox15	69.3884	207.86	1.5799	0.0111	UP	No	No	2	Cox15_exon_chr1:263496687	0.8653	0.9199	0.0546	NA	5	0.9202	0.5287	-0.3915	NA	Cox15_exon_chr1:263496687
2	Cox15									Cox15_intron_chr1:263510045	0.1347	0.0801	-0.0546	NA	1	NA	NA	NA	NA	Cox15_intron_chr1:263510045
1	Dnmbp	52.5226	26.2294	-1.0075	0.3244	NC	No	No	1	Dnmbp_exon_chr1:263626951	1.0	1.0	0.0	NA	2	1.0	0.8224	-0.1776	NA	Dnmbp_exon_chr1:263626951
1	Erlin1	166.7784	239.4685	0.5205	0.1995	NC	No	Yes	4	Erlin1_exon_chr1:263812642	0.8393	0.6326	-0.2067	NA	4	1.0	0.3647	-0.6353	Shortening	Erlin1_exon_chr1:263812642
2	Erlin1									Erlin1_exon_chr1:263816034	0.0725	0.0388	-0.0337	NA	1	NA	NA	NA	NA	Erlin1_exon_chr1:263816034
3	Erlin1									Erlin1_exon_chr1:263823145	0.0847	0.2863	0.2016	NA	1	NA	NA	NA	NA	Erlin1_exon_chr1:263823145
4	Erlin1									Erlin1_intron_chr1:263814552	0.0	0.0424	0.0424	NA	1	NA	NA	NA	NA	Erlin1_intron_chr1:263814552
1	Chuk	120.4286	93.5404	-0.3531	0.6167	NC	No	No	5	Chuk_exon_chr1:263850049	0.6919	0.6034	-0.0885	NA	1	NA	NA	NA	NA	Chuk_exon_chr1:263850049
2	Chuk									Chuk_exon_chr1:263861315	0.0229	0.2688	0.2459	NA	1	NA	NA	NA	NA	Chuk_exon_chr1:263861315
3	Chuk									Chuk_exon_chr1:263863995	0.1073	0.0	-0.1073	NA	2	NA	NA	-0.5845	NA	Chuk_exon_chr1:263863995
4	Chuk									Chuk_exon_chr1:263879968	0.0383	0.0038	-0.0345	NA	1	NA	NA	NA	NA	Chuk_exon_chr1:263879968
5	Chuk									Chuk_intron_chr1:263873491	0.1396	0.1052	-0.0344	NA	1	NA	NA	NA	NA	Chuk_intron_chr1:263873491
1	Cwf19l1	50.279	94.8164	0.9052	0.3081	NC	No	No	1	Cwf19l1_exon_chr1:263887768	1.0	1.0	0.0	NA	1	NA	NA	NA	NA	Cwf19l1_exon_chr1:263887768
1	Bloc1s2	302.896	217.3626	-0.4717	0.2505	NC	No	No	1	Bloc1s2_exon_chr1:263914364	1.0	1.0	0.0	NA	1	NA	NA	NA	NA	Bloc1s2_exon_chr1:263914364
1	Scd	11.712	20.1219	0.7848	1.0	NC	No	No	1	Scd_exon_chr1:264163678	1.0	1.0	0.0	NA	1	NA	NA	NA	NA	Scd_exon_chr1:264163678
1	Ndufb8	696.8693	931.6318	0.4219	0.2963	NC	No	No	1	Ndufb8_exon_chr1:264298845	1.0	1.0	0.0	NA	1	NA	NA	NA	NA	Ndufb8_exon_chr1:264298845
1	Mrpl43	217.6985	281.3115	0.3732	0.5331	NC	No	No	1	Mrpl43_exon_chr1:264756125	1.0	1.0	0.0	NA	1	NA	NA	NA	NA	Mrpl43_exon_chr1:264756125
1	Lbx1	3.5185	0.0	-4.445	1.0	NC	No	No	1	Lbx1_exon_chr1:264974150	1.0	1.0	0.0	NA	1	NA	NA	NA	NA	Lbx1_exon_chr1:264974150
1	Poll	26.2202	28.5956	0.1331	0.942	NC	No	No	1	Poll_exon_chr1:265291231	1.0	1.0	0.0	NA	1	NA	NA	NA	NA	Poll_exon_chr1:265291231
1	Fbxw4	152.4557	103.4087	-0.5584	0.3585	NC	No	No	3	Fbxw4_exon_chr1:265319182	0.8416	0.7245	-0.1171	NA	1	NA	NA	NA	NA	Fbxw4_exon_chr1:265319182
2	Fbxw4									Fbxw4_intron_chr1:265331903	0.0	0.0236	0.0236	NA	1	NA	NA	NA	NA	Fbxw4_intron_chr1:265331903
3	Fbxw4									Fbxw4_intron_chr1:265386051	0.1584	0.2519	0.0935	NA	2	1.0	0.6877	-0.3123	NA	Fbxw4_intron_chr1:265386051
1	Oga	176.0991	156.3939	-0.1746	0.7282	NC	No	No	6	Oga_exon_chr1:265524404	0.7594	0.776	0.0166	NA	3	0.1824	0.1528	-0.0296	NA	Oga_exon_chr1:265524404
2	Oga									Oga_exon_chr1:265526663	0.0437	0.1135	0.0698	NA	1	NA	NA	NA	NA	Oga_exon_chr1:265526663
3	Oga									Oga_intron_chr1:265518156	0.1315	0.0046	-0.1269	NA	1	NA	NA	NA	NA	Oga_intron_chr1:265518156
4	Oga									Oga_intron_chr1:265528325	0.0419	0.0183	-0.0236	NA	1	NA	NA	NA	NA	Oga_intron_chr1:265528325
5	Oga									Oga_intron_chr1:265536482	0.0149	0.0624	0.0475	NA	1	NA	NA	NA	NA	Oga_intron_chr1:265536482
6	Oga									Oga_intron_chr1:265541101	0.0086	0.023	0.0144	NA	2	NA	NA	0.498	NA	Oga_intron_chr1:265541101
1	Ldb1	143.644	168.3503	0.2337	0.6742	NC	No	No	1	Ldb1_exon_chr1:265786136	1.0	1.0	0.0	NA	1	NA	NA	NA	NA	Ldb1_exon_chr1:265786136
1	Pitx3	17.8606	2.628	-2.7745	1.0	NC	No	No	1	Pitx3_exon_chr1:265888089	1.0	1.0	0.0	NA	1	NA	NA	NA	NA	Pitx3_exon_chr1:265888089
1	Psd	45.8929	25.2429	-0.8633	0.4811	NC	No	No	1	Psd_exon_chr1:266060204	1.0	1.0	0.0	NA	1	NA	NA	NA	NA	Psd_exon_chr1:266060204
1	Cuedc2	85.5619	175.7429	1.0352	0.0221	UP	No	No	1	Cuedc2_exon_chr1:266078407	1.0	1.0	0.0	NA	1	NA	NA	NA	NA	Cuedc2_exon_chr1:266078407
1	Actr1a	301.7955	452.399	0.5895	0.1432	NC	No	No	2	Actr1a_exon_chr1:266125544	0.9773	0.9834	0.0061	NA	6	0.7037	0.7488	0.0451	NA	Actr1a_exon_chr1:266125544
2	Actr1a									Actr1a_intron_chr1:266131523	0.0227	0.0166	-0.0061	NA	1	NA	NA	NA	NA	Actr1a_intron_chr1:266131523
1	Arl3	729.8856	838.4057	0.203	0.5288	NC	No	No	2	Arl3_exon_chr1:266287287	0.9961	0.9879	-0.0082	NA	2	0.9767	0.9856	0.009	NA	Arl3_exon_chr1:266287287
2	Arl3									Arl3_intron_chr1:266297859	0.0007	0.0104	0.0097	NA	2	NA	NA	0.0006	NA	Arl3_intron_chr1:266297859
1	Pcgf6	41.6368	24.9333	-0.7405	0.6046	NC	No	No	4	Pcgf6_exon_chr1:266812455	0.618	0.8923	0.2743	NA	1	NA	NA	NA	NA	Pcgf6_exon_chr1:266812455
2	Pcgf6									Pcgf6_exon_chr1:266826115	0.0911	0.0	-0.0911	NA	1	NA	NA	NA	NA	Pcgf6_exon_chr1:266826115
3	Pcgf6									Pcgf6_exon_chr1:266828106	0.2527	0.0282	-0.2245	NA	1	NA	NA	NA	NA	Pcgf6_exon_chr1:266828106
4	Pcgf6									Pcgf6_intron_chr1:266820832	0.0382	0.0795	0.0413	NA	1	NA	NA	NA	NA	Pcgf6_intron_chr1:266820832
1	Atp5md	1716.7005	1455.6791	-0.2369	0.3599	NC	No	No	1	Atp5md_exon_chr1:266860066	1.0	1.0	0.0	NA	1	NA	NA	NA	NA	Atp5md_exon_chr1:266860066
1	Calhm2	197.3512	209.4911	0.0887	0.8752	NC	No	No	1	Calhm2_exon_chr1:266909275	1.0	1.0	0.0	NA	1	NA	NA	NA	NA	Calhm2_exon_chr1:266909275
1	Stn1	219.8091	339.9506	0.6275	0.1368	NC	No	No	2	Stn1_exon_chr1:267282150	0.9876	0.9853	-0.0022	NA	1	NA	NA	NA	NA	Stn1_exon_chr1:267282150
2	Stn1									Stn1_intron_chr1:267303712	0.0124	0.0115	-0.0009	NA	1	NA	NA	NA	NA	Stn1_intron_chr1:267303712
1	Xpnpep1	354.3839	337.6753	-0.0656	0.8204	NC	No	No	1	Xpnpep1_exon_chr1:273708750	1.0	1.0	0.0	NA	1	NA	NA	NA	NA	Xpnpep1_exon_chr1:273708750
1	Smndc1	245.453	281.2404	0.1945	0.6766	NC	No	Yes	4	Smndc1_exon_chr1:274097302	0.4975	0.6277	0.1303	NA	3	0.6059	0.1011	-0.5048	Shortening	Smndc1_exon_chr1:274097302
2	Smndc1									Smndc1_exon_chr1:274098156	0.1968	0.1488	-0.048	NA	1	NA	NA	NA	NA	Smndc1_exon_chr1:274098156
3	Smndc1									Smndc1_exon_chr1:274100298	0.2893	0.2234	-0.0659	NA	1	NA	NA	NA	NA	Smndc1_exon_chr1:274100298
4	Smndc1									Smndc1_intron_chr1:274106947	0.0164	0.0	-0.0164	NA	1	NA	NA	NA	NA	Smndc1_intron_chr1:274106947
1	Zdhhc6	71.2979	145.3466	1.0218	0.0936	UP	Yes	No	2	Zdhhc6_exon_chr1:276291978	0.5661	0.7252	0.1591	Up	1	NA	NA	NA	NA	Zdhhc6_exon_chr1:276291978
2	Zdhhc6									Zdhhc6_intron_chr1:276295099	0.4339	0.2748	-0.1591	NA	4	0.1955	0.1802	-0.0154	NA	Zdhhc6_intron_chr1:276295099
1	Dclre1a	40.2798	52.9808	0.3841	0.7132	NC	No	No	1	Dclre1a_exon_chr1:277336282	1.0	1.0	0.0	NA	1	NA	NA	NA	NA	Dclre1a_exon_chr1:277336282
1	Afap1l2	22.2896	38.9519	0.7987	0.4587	NC	No	No	2	Afap1l2_exon_chr1:277731825	0.9344	0.8979	-0.0365	NA	1	NA	NA	NA	NA	Afap1l2_exon_chr1:277731825
2	Afap1l2									Afap1l2_intron_chr1:277821095	0.0656	0.1021	0.0365	NA	1	NA	NA	NA	NA	Afap1l2_intron_chr1:277821095
1	Pdzd8	153.0067	140.8848	-0.1203	0.9693	NC	No	No	4	Pdzd8_exon_chr1:280463728	0.7881	0.8982	0.1101	NA	9	0.7897	0.6663	-0.1234	NA	Pdzd8_exon_chr1:280463728
2	Pdzd8									Pdzd8_exon_chr1:280485676	0.1032	0.0263	-0.0769	NA	1	NA	NA	NA	NA	Pdzd8_exon_chr1:280485676
3	Pdzd8									Pdzd8_intron_chr1:280485573	0.1087	0.0526	-0.0562	NA	3	NA	NA	-0.1787	NA	Pdzd8_intron_chr1:280485573
4	Pdzd8									Pdzd8_intron_chr1:280514544	0.0	0.0229	0.0229	NA	1	NA	NA	NA	NA	Pdzd8_intron_chr1:280514544
1	Fam204a	92.6378	113.7122	0.2957	0.7949	NC	No	No	3	Fam204a_exon_chr1:281348834	0.4859	0.6798	0.1939	NA	9	0.4377	0.176	-0.2617	NA	Fam204a_exon_chr1:281348834
2	Fam204a									Fam204a_exon_chr1:281370487	0.2532	0.1327	-0.1206	NA	1	NA	NA	NA	NA	Fam204a_exon_chr1:281370487
3	Fam204a									Fam204a_exon_chr1:281370902	0.2556	0.1875	-0.0681	NA	2	0.6291	0.6949	0.0658	NA	Fam204a_exon_chr1:281370902
1	Cacul1	237.9865	523.2526	1.1383	0.0055	UP	No	Yes	5	Cacul1_exon_chr1:281818539	0.8571	0.9286	0.0714	NA	6	0.6855	0.1214	-0.5642	Shortening	Cacul1_exon_chr1:281818539
2	Cacul1									Cacul1_intron_chr1:281825347	0.0574	0.022	-0.0354	NA	1	NA	NA	NA	NA	Cacul1_intron_chr1:281825347
3	Cacul1									Cacul1_intron_chr1:281834155	0.025	0.004	-0.021	NA	2	NA	NA	-0.0167	NA	Cacul1_intron_chr1:281834155
4	Cacul1									Cacul1_intron_chr1:281855998	0.0498	0.0367	-0.0132	NA	7	NA	NA	0.0663	NA	Cacul1_intron_chr1:281855998
5	Cacul1									Cacul1_intron_chr1:281873867	0.0106	0.0087	-0.0019	NA	1	NA	NA	NA	NA	Cacul1_intron_chr1:281873867
1	Eif3a	23128.6815	13945.6079	-0.73	0.2419	NC	No	Yes	7	Eif3a_exon_chr1:282140922	0.0166	0.0401	0.0235	NA	4	0.763	0.4254	-0.3377	Both	Eif3a_exon_chr1:282140922
2	Eif3a									Eif3a_exon_chr1:282143354	0.0441	0.0472	0.0032	NA	2	0.648	0.5943	-0.0537	NA	Eif3a_exon_chr1:282143354
3	Eif3a									Eif3a_exon_chr1:282148200	0.4326	0.4878	0.0552	NA	1	NA	NA	NA	NA	Eif3a_exon_chr1:282148200
4	Eif3a									Eif3a_exon_chr1:282149529	0.2448	0.1994	-0.0454	NA	3	0.5306	0.603	0.0724	NA	Eif3a_exon_chr1:282149529
5	Eif3a									Eif3a_exon_chr1:282151460	0.0917	0.094	0.0023	NA	1	NA	NA	NA	NA	Eif3a_exon_chr1:282151460
6	Eif3a									Eif3a_exon_chr1:282151904	0.0633	0.051	-0.0122	NA	2	0.3878	0.3848	-0.003	NA	Eif3a_exon_chr1:282151904
7	Eif3a									Eif3a_exon_chr1:282152979	0.1022	0.0762	-0.0259	NA	5	0.9694	0.9586	-0.0108	NA	Eif3a_exon_chr1:282152979
1	Sfxn4	100.9886	58.709	-0.788	0.442	NC	No	No	1	Sfxn4_exon_chr1:282213951	1.0	1.0	0.0	NA	1	NA	NA	NA	NA	Sfxn4_exon_chr1:282213951
1	Prdx3	254.4801	325.8246	0.3599	0.4575	NC	No	No	1	Prdx3_exon_chr1:282239443	1.0	1.0	0.0	NA	1	NA	NA	NA	NA	Prdx3_exon_chr1:282239443
1	Abcc1	21.4764	117.2424	2.4418	0.0088	UP	No	Yes	4	Abcc1_exon_chr10:549988	0.7818	0.8936	0.1118	Up	2	NA	NA	-0.27	Shortening	Abcc1_exon_chr10:549988
2	Abcc1									Abcc1_intron_chr10:562092	0.0	0.0297	0.0297	NA	1	NA	NA	NA	NA	Abcc1_intron_chr10:562092
3	Abcc1									Abcc1_intron_chr10:593515	0.1226	0.0656	-0.057	NA	2	NA	NA	0.1676	NA	Abcc1_intron_chr10:593515
4	Abcc1									Abcc1_intron_chr10:626472	0.0956	0.0111	-0.0845	NA	1	NA	NA	NA	NA	Abcc1_intron_chr10:626472
1	Nde1	89.3245	59.648	-0.59	0.4994	NC	No	Yes	4	Nde1_exon_chr10:861732	0.7164	0.573	-0.1433	NA	2	0.6499	0.217	-0.4329	Shortening	Nde1_exon_chr10:861732
2	Nde1									Nde1_intron_chr10:863184	0.2279	0.3532	0.1252	NA	1	NA	NA	NA	NA	Nde1_intron_chr10:863184
3	Nde1									Nde1_intron_chr10:868341	0.0557	0.0262	-0.0295	NA	1	NA	NA	NA	NA	Nde1_intron_chr10:868341
4	Nde1									Nde1_intron_chr10:878472	0.0	0.0476	0.0476	NA	1	NA	NA	NA	NA	Nde1_intron_chr10:878472
1	Pdxdc1	191.5813	156.6177	-0.2944	0.6986	NC	No	Yes	5	Pdxdc1_exon_chr10:3304395	0.0266	0.0161	-0.0104	NA	1	NA	NA	NA	NA	Pdxdc1_exon_chr10:3304395
2	Pdxdc1									Pdxdc1_exon_chr10:3304937	0.2416	0.1579	-0.0837	NA	2	NA	NA	-0.0376	NA	Pdxdc1_exon_chr10:3304937
3	Pdxdc1									Pdxdc1_intron_chr10:3242235	0.6676	0.7032	0.0355	NA	5	0.5199	0.0667	-0.4532	Both	Pdxdc1_intron_chr10:3242235
4	Pdxdc1									Pdxdc1_intron_chr10:3260918	0.0566	0.0115	-0.045	NA	1	NA	NA	NA	NA	Pdxdc1_intron_chr10:3260918
5	Pdxdc1									Pdxdc1_intron_chr10:3321222	0.0	0.1066	0.1066	NA	2	NA	NA	0.2001	NA	Pdxdc1_intron_chr10:3321222
1	Snx29	23.7521	5.3361	-2.125	1.0	NC	No	No	5	Snx29_exon_chr10:3842151	0.0	0.739	0.739	NA	1	NA	NA	NA	NA	Snx29_exon_chr10:3842151
2	Snx29									Snx29_intron_chr10:3930910	0.2865	0.0653	-0.2213	NA	1	NA	NA	NA	NA	Snx29_intron_chr10:3930910
3	Snx29									Snx29_intron_chr10:4009102	0.3799	0.0	-0.3799	NA	1	NA	NA	NA	NA	Snx29_intron_chr10:4009102
4	Snx29									Snx29_intron_chr10:4213517	0.1485	0.1304	-0.0181	NA	1	NA	NA	NA	NA	Snx29_intron_chr10:4213517
5	Snx29									Snx29_intron_chr10:4249670	0.185	0.0653	-0.1198	NA	2	NA	NA	-0.3332	NA	Snx29_intron_chr10:4249670
1	LOC100911627	94.6764	56.191	-0.7594	0.376	NC	No	No	4	LOC100911627_exon_chr10:4366867	0.2275	0.3441	0.1166	NA	3	NA	NA	-0.3528	NA	LOC100911627_exon_chr10:4366867
2	LOC100911627									LOC100911627_exon_chr10:4479384	0.2836	0.3504	0.0669	NA	3	0.8435	0.5843	-0.2591	NA	LOC100911627_exon_chr10:4479384
3	LOC100911627									LOC100911627_intron_chr10:4374892	0.2445	0.1633	-0.0811	NA	2	NA	NA	-0.4981	NA	LOC100911627_intron_chr10:4374892
4	LOC100911627									LOC100911627_intron_chr10:4487409	0.2445	0.1421	-0.1023	NA	1	NA	NA	NA	NA	LOC100911627_intron_chr10:4487409
1	Snn	65.6369	43.8894	-0.5833	0.6196	NC	No	No	1	Snn_exon_chr10:4638725	1.0	1.0	0.0	NA	3	0.9964	0.9458	-0.0505	NA	Snn_exon_chr10:4638725
1	Nubp1	91.4628	72.1879	-0.3478	0.7424	NC	No	No	2	Nubp1_exon_chr10:5333670	1.0	0.981	-0.019	NA	1	NA	NA	NA	NA	Nubp1_exon_chr10:5333670
2	Nubp1									Nubp1_exon_chr10:5341944	0.0	0.019	0.019	NA	1	NA	NA	NA	NA	Nubp1_exon_chr10:5341944
1	RGD1309748	171.4586	153.8791	-0.1598	0.7162	NC	Yes	Yes	2	RGD1309748_exon_chr10:6844096	0.6756	0.9726	0.297	NA	9	0.733	0.3915	-0.3415	Both	RGD1309748_exon_chr10:6844096
2	RGD1309748									RGD1309748_intron_chr10:6858306	0.3244	0.0274	-0.297	Down	7	NA	NA	-0.4861	Both	RGD1309748_intron_chr10:6858306
1	Pmm2	190.2339	108.6111	-0.8065	0.0301	DOWN	No	No	7	Pmm2_exon_chr10:7057275	0.8836	0.8987	0.0151	NA	1	NA	NA	NA	NA	Pmm2_exon_chr10:7057275
2	Pmm2									Pmm2_exon_chr10:7068138	0.0169	0.0033	-0.0137	NA	1	NA	NA	NA	NA	Pmm2_exon_chr10:7068138
3	Pmm2									Pmm2_exon_chr10:7071574	0.0346	0.0055	-0.0291	NA	1	NA	NA	NA	NA	Pmm2_exon_chr10:7071574
4	Pmm2									Pmm2_exon_chr10:7077443	0.0119	0.0	-0.0119	NA	1	NA	NA	NA	NA	Pmm2_exon_chr10:7077443
5	Pmm2									Pmm2_intron_chr10:7065636	0.0106	0.0	-0.0106	NA	1	NA	NA	NA	NA	Pmm2_intron_chr10:7065636
6	Pmm2									Pmm2_intron_chr10:7068046	0.0	0.0264	0.0264	NA	1	NA	NA	NA	NA	Pmm2_intron_chr10:7068046
7	Pmm2									Pmm2_intron_chr10:7077325	0.0424	0.0661	0.0237	NA	1	NA	NA	NA	NA	Pmm2_intron_chr10:7077325
1	Rbfox1	44.4602	14.6903	-1.5851	1.0	NC	No	No	2	Rbfox1_exon_chr10:8315756	0.8319	0.8797	0.0479	NA	5	NA	NA	-0.083	NA	Rbfox1_exon_chr10:8315756
2	Rbfox1									Rbfox1_intron_chr10:8654576	0.1681	0.1203	-0.0479	NA	3	NA	NA	0.1295	NA	Rbfox1_intron_chr10:8654576
1	Alg1	49.8233	30.4029	-0.7126	0.6418	NC	No	No	1	Alg1_exon_chr10:10540418	1.0	1.0	0.0	NA	1	NA	NA	NA	NA	Alg1_exon_chr10:10540418
1	Ubn1	428.1552	191.4623	-1.1693	0.0008	DOWN	No	No	6	Ubn1_exon_chr10:10692445	0.5575	0.4769	-0.0806	NA	1	NA	NA	NA	NA	Ubn1_exon_chr10:10692445
2	Ubn1									Ubn1_exon_chr10:10699846	0.0118	0.0	-0.0118	NA	1	NA	NA	NA	NA	Ubn1_exon_chr10:10699846
3	Ubn1									Ubn1_exon_chr10:10703823	0.0979	0.0524	-0.0454	NA	1	NA	NA	NA	NA	Ubn1_exon_chr10:10703823
4	Ubn1									Ubn1_exon_chr10:10712886	0.1338	0.2504	0.1166	NA	3	0.6825	0.2571	-0.4254	NA	Ubn1_exon_chr10:10712886
5	Ubn1									Ubn1_exon_chr10:10713682	0.0382	0.092	0.0538	NA	1	NA	NA	NA	NA	Ubn1_exon_chr10:10713682
6	Ubn1									Ubn1_exon_chr10:10715401	0.1542	0.1219	-0.0323	NA	2	1.0	0.9864	-0.0136	NA	Ubn1_exon_chr10:10715401
1	Nudt16l1	70.3723	51.8472	-0.4399	0.6787	NC	No	No	2	Nudt16l1_exon_chr10:10830702	0.8223	0.7422	-0.0801	NA	1	NA	NA	NA	NA	Nudt16l1_exon_chr10:10830702
2	Nudt16l1									Nudt16l1_intron_chr10:10831274	0.1777	0.2578	0.0801	NA	1	NA	NA	NA	NA	Nudt16l1_intron_chr10:10831274
1	Mgrn1	9.5053	26.3788	1.4913	1.0	NC	No	No	3	Mgrn1_exon_chr10:10834040	0.4674	0.9332	0.4658	NA	3	NA	NA	0.3272	NA	Mgrn1_exon_chr10:10834040
2	Mgrn1									Mgrn1_intron_chr10:10844831	0.3105	0.0	-0.3105	NA	1	NA	NA	NA	NA	Mgrn1_intron_chr10:10844831
3	Mgrn1									Mgrn1_intron_chr10:10860932	0.2221	0.0668	-0.1553	NA	2	NA	NA	NA	NA	Mgrn1_intron_chr10:10860932
1	Hmox2	111.3487	141.7117	0.3505	0.6552	NC	No	No	3	Hmox2_exon_chr10:10990865	0.9712	0.9884	0.0173	NA	2	0.2806	0.2229	-0.0577	NA	Hmox2_exon_chr10:10990865
2	Hmox2									Hmox2_intron_chr10:10993954	0.0	0.0116	0.0116	NA	1	NA	NA	NA	NA	Hmox2_intron_chr10:10993954
3	Hmox2									Hmox2_intron_chr10:11005801	0.0288	0.0	-0.0288	NA	1	NA	NA	NA	NA	Hmox2_intron_chr10:11005801
1	Dnaja3	54.4835	143.1888	1.3867	0.111	NC	No	No	1	Dnaja3_exon_chr10:11060856	1.0	1.0	0.0	NA	1	NA	NA	NA	NA	Dnaja3_exon_chr10:11060856
1	Vasn	54.2138	66.9408	0.2932	0.8778	NC	No	No	1	Vasn_exon_chr10:11123633	1.0	1.0	0.0	NA	1	NA	NA	NA	NA	Vasn_exon_chr10:11123633
1	Glis2	123.777	70.365	-0.8279	0.2919	NC	No	No	2	Glis2_exon_chr10:11157102	0.7732	0.7845	0.0113	NA	1	NA	NA	NA	NA	Glis2_exon_chr10:11157102
2	Glis2									Glis2_intron_chr10:11158565	0.2268	0.2155	-0.0113	NA	1	NA	NA	NA	NA	Glis2_intron_chr10:11158565
1	Cluap1	54.6389	59.7377	0.132	1.0	NC	No	No	3	Cluap1_exon_chr10:11847486	0.5072	0.7451	0.2379	NA	3	0.8248	0.8988	0.074	NA	Cluap1_exon_chr10:11847486
2	Cluap1									Cluap1_exon_chr10:11856996	0.1015	0.0442	-0.0573	NA	1	NA	NA	NA	NA	Cluap1_exon_chr10:11856996
3	Cluap1									Cluap1_exon_chr10:11863664	0.3913	0.2107	-0.1806	NA	1	NA	NA	NA	NA	Cluap1_exon_chr10:11863664
1	Naa60	103.2027	76.291	-0.4461	0.545	NC	No	No	4	Naa60_exon_chr10:11882950	0.8725	0.9671	0.0945	NA	1	NA	NA	NA	NA	Naa60_exon_chr10:11882950
2	Naa60									Naa60_exon_chr10:11885688	0.0576	0.0282	-0.0294	NA	1	NA	NA	NA	NA	Naa60_exon_chr10:11885688
3	Naa60									Naa60_exon_chr10:11889053	0.0302	0.0	-0.0302	NA	1	NA	NA	NA	NA	Naa60_exon_chr10:11889053
4	Naa60									Naa60_intron_chr10:11901662	0.0397	0.0047	-0.035	NA	1	NA	NA	NA	NA	Naa60_intron_chr10:11901662
1	Zfp263	10.8751	29.5996	1.4231	1.0	NC	No	No	1	Zfp263_exon_chr10:12025713	1.0	1.0	0.0	NA	1	NA	NA	NA	NA	Zfp263_exon_chr10:12025713
1	Zfp213	17.0319	20.4599	0.2813	1.0	NC	No	No	4	Zfp213_exon_chr10:12887026	0.2033	0.0171	-0.1863	NA	1	NA	NA	NA	NA	Zfp213_exon_chr10:12887026
2	Zfp213									Zfp213_intron_chr10:12888580	0.5903	0.5988	0.0085	NA	1	NA	NA	NA	NA	Zfp213_intron_chr10:12888580
3	Zfp213									Zfp213_intron_chr10:12889501	0.0	0.3842	0.3842	NA	1	NA	NA	NA	NA	Zfp213_intron_chr10:12889501
4	Zfp213									Zfp213_intron_chr10:12892176	0.2063	0.0	-0.2063	NA	1	NA	NA	NA	NA	Zfp213_intron_chr10:12892176
1	Thoc6	80.738	94.6814	0.2366	0.9061	NC	No	No	2	Thoc6_exon_chr10:12989400	0.9723	0.9756	0.0033	NA	1	NA	NA	NA	NA	Thoc6_exon_chr10:12989400
2	Thoc6									Thoc6_exon_chr10:12991195	0.0277	0.0244	-0.0033	NA	1	NA	NA	NA	NA	Thoc6_exon_chr10:12991195
1	Tnfrsf12a	3498.2232	2029.9329	-0.7848	0.0122	DOWN	No	No	1	Tnfrsf12a_exon_chr10:12996503	1.0	1.0	0.0	NA	1	NA	NA	NA	NA	Tnfrsf12a_exon_chr10:12996503
1	Paqr4	7.7232	13.2437	0.7751	1.0	NC	No	No	1	Paqr4_exon_chr10:13073544	1.0	1.0	0.0	NA	1	NA	NA	NA	NA	Paqr4_exon_chr10:13073544
1	Elob	1974.7317	885.7045	-1.1588	0.0	DOWN	No	No	1	Elob_exon_chr10:13163205	1.0	1.0	0.0	NA	1	NA	NA	NA	NA	Elob_exon_chr10:13163205
1	Kctd5	58.1596	58.9447	0.0159	1.0	NC	No	No	2	Kctd5_exon_chr10:13421935	0.9698	1.0	0.0302	NA	3	0.9848	0.7972	-0.1876	NA	Kctd5_exon_chr10:13421935
2	Kctd5									Kctd5_exon_chr10:13431543	0.0302	0.0	-0.0302	NA	1	NA	NA	NA	NA	Kctd5_exon_chr10:13431543
1	Pdpk1	26.4964	13.1643	-1.0201	1.0	NC	No	No	2	Pdpk1_exon_chr10:13479015	0.945	0.6125	-0.3325	NA	1	NA	NA	NA	NA	Pdpk1_exon_chr10:13479015
2	Pdpk1									Pdpk1_intron_chr10:13464531	0.055	0.3875	0.3325	NA	2	NA	NA	-0.2176	NA	Pdpk1_intron_chr10:13464531
1	Amdhd2	1642.048	1212.9351	-0.4386	0.0957	NC	No	No	2	Amdhd2_exon_chr10:13528674	0.0791	0.0822	0.0031	NA	1	NA	NA	NA	NA	Amdhd2_exon_chr10:13528674
2	Amdhd2									Amdhd2_exon_chr10:13537766	0.9209	0.9178	-0.0031	NA	4	0.9508	0.9277	-0.0232	NA	Amdhd2_exon_chr10:13537766
1	Tbc1d24	26.5308	20.2285	-0.3933	1.0	NC	No	No	1	Tbc1d24_intron_chr10:13576690	1.0	1.0	0.0	NA	2	0.7007	0.9491	0.2484	NA	Tbc1d24_intron_chr10:13576690
1	Ntn3	3.8573	11.195	1.5564	1.0	NC	No	No	1	Ntn3_exon_chr10:13578217	1.0	1.0	0.0	NA	2	NA	NA	-0.2667	NA	Ntn3_exon_chr10:13578217
1	Tedc2	17.5628	8.8354	-0.9777	1.0	NC	No	No	3	Tedc2_exon_chr10:13587659	0.1145	0.3201	0.2056	NA	1	NA	NA	NA	NA	Tedc2_exon_chr10:13587659
2	Tedc2									Tedc2_exon_chr10:13591321	0.3149	0.0	-0.3149	NA	1	NA	NA	NA	NA	Tedc2_exon_chr10:13591321
3	Tedc2									Tedc2_intron_chr10:13590470	0.5705	0.6799	0.1094	NA	1	NA	NA	NA	NA	Tedc2_intron_chr10:13590470
1	Ccnf	112.6456	82.0046	-0.4632	0.5629	NC	No	No	2	Ccnf_exon_chr10:13596083	0.9439	0.6944	-0.2494	NA	2	1.0	0.8481	-0.1519	NA	Ccnf_exon_chr10:13596083
2	Ccnf									Ccnf_intron_chr10:13611651	0.0561	0.3056	0.2494	NA	3	NA	NA	0.0404	NA	Ccnf_intron_chr10:13611651
1	E4f1	92.9938	103.5708	0.148	1.0	NC	No	No	2	E4f1_exon_chr10:13815831	1.0	0.9771	-0.0229	NA	1	NA	NA	NA	NA	E4f1_exon_chr10:13815831
2	E4f1									E4f1_intron_chr10:13820988	0.0	0.0229	0.0229	NA	1	NA	NA	NA	NA	E4f1_intron_chr10:13820988
1	Mlst8	28.7422	40.381	0.4795	1.0	NC	No	No	1	Mlst8_exon_chr10:13841627	1.0	1.0	0.0	NA	2	0.9349	0.1857	-0.7491	NA	Mlst8_exon_chr10:13841627
1	Traf7	238.7278	273.0005	0.1995	0.6653	NC	No	No	1	Traf7_exon_chr10:13874975	1.0	1.0	0.0	NA	1	NA	NA	NA	NA	Traf7_exon_chr10:13874975
1	Tsc2	69.2352	66.7053	-0.0387	1.0	NC	No	No	1	Tsc2_exon_chr10:13962310	1.0	1.0	0.0	NA	1	NA	NA	NA	NA	Tsc2_exon_chr10:13962310
1	Slc9a3r2	88.3775	53.0854	-0.7522	0.2763	NC	No	No	1	Slc9a3r2_exon_chr10:14004509	1.0	1.0	0.0	NA	3	0.3679	0.4051	0.0372	NA	Slc9a3r2_exon_chr10:14004509
1	Gfer	399.6414	130.2807	-1.6101	0.0	DOWN	No	No	1	Gfer_exon_chr10:14060058	1.0	1.0	0.0	NA	2	0.9683	0.9961	0.0278	NA	Gfer_exon_chr10:14060058
1	Tbl3	51.5087	72.31	0.4979	0.6726	NC	No	No	1	Tbl3_exon_chr10:14067118	1.0	1.0	0.0	NA	1	NA	NA	NA	NA	Tbl3_exon_chr10:14067118
1	Rnf151	3.8745	1.9852	-0.9932	1.0	NC	No	No	1	Rnf151_exon_chr10:14084389	1.0	1.0	0.0	NA	1	NA	NA	NA	NA	Rnf151_exon_chr10:14084389
1	Ndufb10	899.8324	515.1946	-0.8074	0.0519	DOWN	No	No	1	Ndufb10_exon_chr10:14090295	1.0	1.0	0.0	NA	1	NA	NA	NA	NA	Ndufb10_exon_chr10:14090295
1	Fahd1	156.937	78.7372	-0.9916	0.1072	NC	No	No	1	Fahd1_exon_chr10:14215957	1.0	1.0	0.0	NA	3	0.5287	0.6871	0.1584	NA	Fahd1_exon_chr10:14215957
1	Nubp2	146.1575	108.6128	-0.431	0.4123	NC	No	No	1	Nubp2_exon_chr10:14244895	1.0	1.0	0.0	NA	1	NA	NA	NA	NA	Nubp2_exon_chr10:14244895
1	Mapk8ip3	34.4438	35.8241	0.0491	1.0	NC	No	No	2	Mapk8ip3_intron_chr10:14274772	1.0	0.9182	-0.0818	NA	3	0.0476	0.0278	-0.0198	NA	Mapk8ip3_intron_chr10:14274772
2	Mapk8ip3									Mapk8ip3_intron_chr10:14298849	0.0	0.0818	0.0818	NA	1	NA	NA	NA	NA	Mapk8ip3_intron_chr10:14298849
1	Jpt2	136.139	210.6772	0.6413	0.2253	NC	No	Yes	1	Jpt2_exon_chr10:14306441	1.0	1.0	0.0	NA	4	0.9686	0.4516	-0.517	Shortening	Jpt2_exon_chr10:14306441
1	Gnptg	47.6251	104.4142	1.1419	0.2054	NC	No	No	1	Gnptg_exon_chr10:14593386	1.0	1.0	0.0	NA	4	0.2407	0.2538	0.0131	NA	Gnptg_exon_chr10:14593386
1	Ube2i	520.1322	915.6461	0.8176	0.0205	UP	No	Yes	1	Ube2i_exon_chr10:14620594	1.0	1.0	0.0	NA	3	0.8529	0.5752	-0.2777	Shortening	Ube2i_exon_chr10:14620594
1	Chtf18	12.1847	44.6596	1.8415	0.1536	NC	No	No	2	Chtf18_exon_chr10:15091016	1.0	0.9164	-0.0836	NA	1	NA	NA	NA	NA	Chtf18_exon_chr10:15091016
2	Chtf18									Chtf18_exon_chr10:15095199	0.0	0.0836	0.0836	NA	1	NA	NA	NA	NA	Chtf18_exon_chr10:15095199
1	Msln	13.9364	16.7263	0.2733	1.0	NC	No	No	1	Msln_exon_chr10:15119946	1.0	1.0	0.0	NA	1	NA	NA	NA	NA	Msln_exon_chr10:15119946
1	Antkmt	87.7538	70.8659	-0.3115	0.8881	NC	No	No	1	Antkmt_exon_chr10:15160307	1.0	1.0	0.0	NA	2	0.1142	0.099	-0.0151	NA	Antkmt_exon_chr10:15160307
1	Metrn	140.5782	156.6823	0.1508	0.8604	NC	No	No	1	Metrn_exon_chr10:15164794	1.0	1.0	0.0	NA	1	NA	NA	NA	NA	Metrn_exon_chr10:15164794
1	Stub1	269.6061	280.3175	0.0628	0.8847	NC	No	No	1	Stub1_exon_chr10:15198127	1.0	1.0	0.0	NA	3	0.2923	0.2976	0.0052	NA	Stub1_exon_chr10:15198127
1	Rhot2	60.9556	105.238	0.7916	0.5271	NC	No	No	2	Rhot2_exon_chr10:15206597	0.8499	0.7529	-0.097	NA	2	0.1391	0.1665	0.0273	NA	Rhot2_exon_chr10:15206597
2	Rhot2									Rhot2_exon_chr10:15211739	0.1501	0.2471	0.097	NA	1	NA	NA	NA	NA	Rhot2_exon_chr10:15211739
1	Mcrip2	15.6192	1.5178	-3.4642	0.8541	NC	No	No	1	Mcrip2_exon_chr10:15231143	1.0	1.0	0.0	NA	1	NA	NA	NA	NA	Mcrip2_exon_chr10:15231143
1	Pigq	143.7753	147.197	0.0347	0.8852	NC	No	No	1	Pigq_exon_chr10:15290897	1.0	1.0	0.0	NA	2	0.9795	0.9807	0.0012	NA	Pigq_exon_chr10:15290897
1	Capn15	24.4127	15.3309	-0.6634	1.0	NC	No	No	2	Capn15_exon_chr10:15321159	1.0	0.8835	-0.1165	NA	1	NA	NA	NA	NA	Capn15_exon_chr10:15321159
2	Capn15									Capn15_exon_chr10:15326491	0.0	0.1165	0.1165	NA	1	NA	NA	NA	NA	Capn15_exon_chr10:15326491
1	Decr2	16.976	7.4733	-1.2024	1.0	NC	No	No	2	Decr2_exon_chr10:15452330	1.0	0.9012	-0.0988	NA	3	NA	NA	0.0396	NA	Decr2_exon_chr10:15452330
2	Decr2									Decr2_intron_chr10:15457159	0.0	0.0988	0.0988	NA	1	NA	NA	NA	NA	Decr2_intron_chr10:15457159
1	Nme4	12.7412	1.4113	-3.1685	1.0	NC	No	No	1	Nme4_exon_chr10:15461987	1.0	1.0	0.0	NA	1	NA	NA	NA	NA	Nme4_exon_chr10:15461987
1	Mpg	19.3532	29.8783	0.6292	1.0	NC	No	No	1	Mpg_exon_chr10:15662217	1.0	1.0	0.0	NA	1	NA	NA	NA	NA	Mpg_exon_chr10:15662217
1	Cpeb4	10.6206	16.6742	0.6221	1.0	NC	No	No	2	Cpeb4_exon_chr10:15988812	0.9258	0.915	-0.0108	NA	2	NA	NA	-0.1797	NA	Cpeb4_exon_chr10:15988812
2	Cpeb4									Cpeb4_exon_chr10:16045835	0.0742	0.085	0.0108	NA	1	NA	NA	NA	NA	Cpeb4_exon_chr10:16045835
1	Bnip1	177.7706	151.2601	-0.2332	0.8728	NC	No	No	2	Bnip1_exon_chr10:16677681	0.9863	0.9643	-0.022	NA	1	NA	NA	NA	NA	Bnip1_exon_chr10:16677681
2	Bnip1									Bnip1_intron_chr10:16680100	0.0137	0.0357	0.022	NA	2	NA	NA	-0.112	NA	Bnip1_intron_chr10:16680100
1	Crebrf	62.4522	61.5845	-0.0177	1.0	NC	No	No	7	Crebrf_exon_chr10:16699206	0.0513	0.1887	0.1373	NA	2	NA	NA	0.3182	NA	Crebrf_exon_chr10:16699206
2	Crebrf									Crebrf_exon_chr10:16710179	0.4321	0.0986	-0.3335	NA	1	NA	NA	NA	NA	Crebrf_exon_chr10:16710179
3	Crebrf									Crebrf_exon_chr10:16712067	0.0358	0.0	-0.0358	NA	1	NA	NA	NA	NA	Crebrf_exon_chr10:16712067
4	Crebrf									Crebrf_exon_chr10:16725151	0.4107	0.5197	0.109	NA	2	NA	NA	0.0492	NA	Crebrf_exon_chr10:16725151
5	Crebrf									Crebrf_intron_chr10:16706377	0.0093	0.1545	0.1451	NA	2	NA	NA	0.0008	NA	Crebrf_intron_chr10:16706377
6	Crebrf									Crebrf_intron_chr10:16711872	0.0607	0.0	-0.0607	NA	1	NA	NA	NA	NA	Crebrf_intron_chr10:16711872
7	Crebrf									Crebrf_intron_chr10:16724061	0.0	0.0386	0.0386	NA	1	NA	NA	NA	NA	Crebrf_intron_chr10:16724061
1	Atp6v0e1	690.07	1042.4907	0.597	0.1124	NC	No	No	1	Atp6v0e1_exon_chr10:16770311	1.0	1.0	0.0	NA	1	NA	NA	NA	NA	Atp6v0e1_exon_chr10:16770311
1	Npm1	5637.314	3263.4773	-0.7892	0.0046	DOWN	No	No	4	Npm1_exon_chr10:18081295	0.8469	0.8094	-0.0375	NA	3	0.9983	0.9826	-0.0157	NA	Npm1_exon_chr10:18081295
2	Npm1									Npm1_exon_chr10:18084120	0.0045	0.0222	0.0177	NA	2	0.1418	0.207	0.0652	NA	Npm1_exon_chr10:18084120
3	Npm1									Npm1_exon_chr10:18088178	0.1118	0.1202	0.0084	NA	1	NA	NA	NA	NA	Npm1_exon_chr10:18088178
4	Npm1									Npm1_intron_chr10:18084018	0.0238	0.0404	0.0166	NA	2	0.9787	0.9788	0.0002	NA	Npm1_intron_chr10:18084018
1	Ranbp17	4.0212	0.0	-4.6434	1.0	NC	No	No	1	Ranbp17_intron_chr10:18408368	1.0	1.0	0.0	NA	1	NA	NA	NA	NA	Ranbp17_intron_chr10:18408368
1	Spdl1	28.7402	61.6306	1.118	0.2234	NC	No	No	4	Spdl1_exon_chr10:19628734	0.2621	0.6134	0.3513	NA	2	NA	NA	-0.29	NA	Spdl1_exon_chr10:19628734
2	Spdl1									Spdl1_exon_chr10:19641316	0.2455	0.2893	0.0438	NA	1	NA	NA	NA	NA	Spdl1_exon_chr10:19641316
3	Spdl1									Spdl1_exon_chr10:19644004	0.4065	0.051	-0.3555	NA	1	NA	NA	NA	NA	Spdl1_exon_chr10:19644004
4	Spdl1									Spdl1_exon_chr10:19650640	0.0859	0.0463	-0.0396	NA	1	NA	NA	NA	NA	Spdl1_exon_chr10:19650640
1	Rars1	376.8515	261.8491	-0.5248	0.1628	NC	No	No	5	Rars1_exon_chr10:20633840	0.6602	0.803	0.1428	NA	1	NA	NA	NA	NA	Rars1_exon_chr10:20633840
2	Rars1									Rars1_exon_chr10:20640745	0.0132	0.0	-0.0132	NA	1	NA	NA	NA	NA	Rars1_exon_chr10:20640745
3	Rars1									Rars1_exon_chr10:20641810	0.0244	0.0014	-0.023	NA	1	NA	NA	NA	NA	Rars1_exon_chr10:20641810
4	Rars1									Rars1_exon_chr10:20657133	0.2932	0.1398	-0.1534	Down	1	NA	NA	NA	NA	Rars1_exon_chr10:20657133
5	Rars1									Rars1_intron_chr10:20649518	0.0091	0.0558	0.0467	NA	1	NA	NA	NA	NA	Rars1_intron_chr10:20649518
1	Mat2b	13.1101	37.0929	1.4966	1.0	NC	No	No	1	Mat2b_exon_chr10:25832972	1.0	1.0	0.0	NA	2	NA	NA	-0.3279	NA	Mat2b_exon_chr10:25832972
1	Hmmr	107.7956	151.9823	0.5023	0.5346	NC	No	No	6	Hmmr_exon_chr10:25861629	0.0	0.2498	0.2498	Up	2	NA	NA	0.2042	NA	Hmmr_exon_chr10:25861629
2	Hmmr									Hmmr_exon_chr10:25866697	0.5773	0.5908	0.0135	NA	3	0.4212	0.4373	0.0161	NA	Hmmr_exon_chr10:25866697
3	Hmmr									Hmmr_exon_chr10:25868868	0.0217	0.0	-0.0217	NA	1	NA	NA	NA	NA	Hmmr_exon_chr10:25868868
4	Hmmr									Hmmr_exon_chr10:25871960	0.3428	0.0646	-0.2782	NA	1	NA	NA	NA	NA	Hmmr_exon_chr10:25871960
5	Hmmr									Hmmr_exon_chr10:25880953	0.0473	0.0502	0.0028	NA	1	NA	NA	NA	NA	Hmmr_exon_chr10:25880953
6	Hmmr									Hmmr_intron_chr10:25880852	0.0109	0.0306	0.0197	NA	2	NA	NA	0.0004	NA	Hmmr_intron_chr10:25880852
1	Ccng1	1704.85	1294.5106	-0.3972	0.1449	NC	No	Yes	2	Ccng1_exon_chr10:25906198	0.9776	0.9308	-0.0468	NA	6	0.8721	0.1878	-0.6843	Shortening	Ccng1_exon_chr10:25906198
2	Ccng1									Ccng1_intron_chr10:25906413	0.0185	0.0655	0.0469	NA	2	0.1786	0.2193	0.0407	NA	Ccng1_intron_chr10:25906413
1	Ttc1	1003.1956	624.8363	-0.6838	0.0054	DOWN	No	No	3	Ttc1_exon_chr10:29343092	0.296	0.3154	0.0194	NA	2	0.928	0.9888	0.0607	NA	Ttc1_exon_chr10:29343092
2	Ttc1									Ttc1_exon_chr10:29359577	0.0309	0.0113	-0.0195	NA	1	NA	NA	NA	NA	Ttc1_exon_chr10:29359577
3	Ttc1									Ttc1_exon_chr10:29365921	0.6712	0.6718	0.0006	NA	1	NA	NA	NA	NA	Ttc1_exon_chr10:29365921
1	Adra1b	80.3327	50.767	-0.6665	0.4254	NC	No	No	2	Adra1b_exon_chr10:29393907	0.9309	0.9646	0.0337	NA	2	0.9885	1.0	0.0115	NA	Adra1b_exon_chr10:29393907
2	Adra1b									Adra1b_intron_chr10:29449272	0.0691	0.0354	-0.0337	NA	2	NA	NA	-0.298	NA	Adra1b_intron_chr10:29449272
1	Ublcp1	65.2571	55.008	-0.2407	0.8991	NC	No	No	2	Ublcp1_exon_chr10:30104689	0.9536	1.0	0.0464	NA	3	0.8043	0.8124	0.0081	NA	Ublcp1_exon_chr10:30104689
2	Ublcp1									Ublcp1_intron_chr10:30110595	0.0464	0.0	-0.0464	NA	1	NA	NA	NA	NA	Ublcp1_intron_chr10:30110595
1	Cyfip2	10.1418	28.7532	1.5089	1.0	NC	No	No	2	Cyfip2_exon_chr10:31281402	1.0	0.9104	-0.0896	NA	3	NA	NA	-0.6509	NA	Cyfip2_exon_chr10:31281402
2	Cyfip2									Cyfip2_intron_chr10:31353589	0.0	0.0896	0.0896	NA	1	NA	NA	NA	NA	Cyfip2_intron_chr10:31353589
1	Sgcd	95.9964	79.6191	-0.2761	0.8558	NC	No	No	5	Sgcd_exon_chr10:32063605	0.0	0.1403	0.1403	NA	1	NA	NA	NA	NA	Sgcd_exon_chr10:32063605
2	Sgcd									Sgcd_intron_chr10:32165094	0.6084	0.4513	-0.157	NA	11	NA	NA	-0.0973	NA	Sgcd_intron_chr10:32165094
3	Sgcd									Sgcd_intron_chr10:32215156	0.0152	0.0093	-0.0059	NA	1	NA	NA	NA	NA	Sgcd_intron_chr10:32215156
4	Sgcd									Sgcd_intron_chr10:32442093	0.1765	0.1073	-0.0692	NA	5	NA	NA	-0.2854	NA	Sgcd_intron_chr10:32442093
5	Sgcd									Sgcd_intron_chr10:32471183	0.1999	0.2917	0.0918	NA	2	NA	NA	0.1906	NA	Sgcd_intron_chr10:32471183
1	Trim41	192.2506	123.9648	-0.6367	0.2629	NC	No	No	2	Trim41_exon_chr10:34157053	0.9791	1.0	0.0209	NA	1	NA	NA	NA	NA	Trim41_exon_chr10:34157053
2	Trim41									Trim41_intron_chr10:34165081	0.0209	0.0	-0.0209	NA	1	NA	NA	NA	NA	Trim41_intron_chr10:34165081
1	Hnrnpab	1547.763	2553.3513	0.7233	0.0048	UP	No	Yes	4	Hnrnpab_exon_chr10:34956321	0.4718	0.4945	0.0227	NA	5	0.8299	0.525	-0.3049	Both	Hnrnpab_exon_chr10:34956321
2	Hnrnpab									Hnrnpab_exon_chr10:34960356	0.0214	0.0067	-0.0147	NA	2	NA	NA	-0.2363	NA	Hnrnpab_exon_chr10:34960356
3	Hnrnpab									Hnrnpab_exon_chr10:37050007	0.469	0.4896	0.0206	NA	5	0.8287	0.519	-0.3097	Both	Hnrnpab_exon_chr10:37050007
4	Hnrnpab									Hnrnpab_exon_chr10:37054042	0.0214	0.0036	-0.0177	NA	2	NA	NA	-0.0941	NA	Hnrnpab_exon_chr10:37054042
1	Rmnd5b	36.554	46.2037	0.3337	0.9012	NC	No	No	2	Rmnd5b_exon_chr10:34980395	0.5	0.5031	0.0031	NA	1	NA	NA	NA	NA	Rmnd5b_exon_chr10:34980395
2	Rmnd5b									Rmnd5b_exon_chr10:37074081	0.5	0.4969	-0.0031	NA	1	NA	NA	NA	NA	Rmnd5b_exon_chr10:37074081
1	N4bp3	89.7885	108.5416	0.2776	0.8584	NC	No	No	2	N4bp3_exon_chr10:34998698	0.4984	0.5097	0.0113	NA	2	1.0	0.9371	-0.0629	NA	N4bp3_exon_chr10:34998698
2	N4bp3									N4bp3_exon_chr10:37092384	0.5016	0.4903	-0.0113	NA	2	1.0	0.939	-0.061	NA	N4bp3_exon_chr10:37092384
1	Trappc2b	121.1301	123.1466	0.0305	1.0	NC	No	No	2	Trappc2b_exon_chr10:35036886	0.504	0.5019	-0.0021	NA	1	NA	NA	NA	NA	Trappc2b_exon_chr10:35036886
2	Trappc2b									Trappc2b_exon_chr10:37130944	0.496	0.4981	0.0021	NA	1	NA	NA	NA	NA	Trappc2b_exon_chr10:37130944
1	Cnot6	72.8293	106.9674	0.5563	0.6599	NC	No	No	5	Cnot6_exon_chr10:35146494	0.8904	0.8315	-0.0588	NA	1	NA	NA	NA	NA	Cnot6_exon_chr10:35146494
2	Cnot6									Cnot6_exon_chr10:35175649	0.0856	0.0099	-0.0757	NA	1	NA	NA	NA	NA	Cnot6_exon_chr10:35175649
3	Cnot6									Cnot6_intron_chr10:35147954	0.008	0.0357	0.0277	NA	2	NA	NA	-0.1106	NA	Cnot6_intron_chr10:35147954
4	Cnot6									Cnot6_intron_chr10:35151988	0.0	0.0286	0.0286	NA	1	NA	NA	NA	NA	Cnot6_intron_chr10:35151988
5	Cnot6									Cnot6_intron_chr10:35157807	0.016	0.0942	0.0782	NA	1	NA	NA	NA	NA	Cnot6_intron_chr10:35157807
1	Sqstm1	1071.6246	1206.3412	0.1715	0.6744	NC	No	No	2	Sqstm1_exon_chr10:35705522	0.8569	0.7144	-0.1425	NA	2	0.9894	0.981	-0.0085	NA	Sqstm1_exon_chr10:35705522
2	Sqstm1									Sqstm1_exon_chr10:35713266	0.1411	0.278	0.1368	Up	1	NA	NA	NA	NA	Sqstm1_exon_chr10:35713266
1	Maml1	38.0769	12.4436	-1.6177	1.0	NC	No	No	2	Maml1_exon_chr10:35768863	1.0	0.5306	-0.4694	NA	1	NA	NA	NA	NA	Maml1_exon_chr10:35768863
2	Maml1									Maml1_intron_chr10:35799528	0.0	0.4694	0.4694	NA	1	NA	NA	NA	NA	Maml1_intron_chr10:35799528
1	Canx	1728.0872	2188.8269	0.341	0.2228	NC	No	Yes	4	Canx_exon_chr10:35804102	0.9276	0.9177	-0.0099	NA	11	0.6752	0.4242	-0.2511	Both	Canx_exon_chr10:35804102
2	Canx									Canx_exon_chr10:35805357	0.0318	0.055	0.0232	NA	1	NA	NA	NA	NA	Canx_exon_chr10:35805357
3	Canx									Canx_exon_chr10:35815668	0.0163	0.0072	-0.0091	NA	1	NA	NA	NA	NA	Canx_exon_chr10:35815668
4	Canx									Canx_exon_chr10:35818308	0.0215	0.0179	-0.0035	NA	1	NA	NA	NA	NA	Canx_exon_chr10:35818308
1	Rufy1	108.2377	31.7884	-1.7705	0.0762	DOWN	No	No	6	Rufy1_exon_chr10:35883460	0.251	0.463	0.2119	NA	1	NA	NA	NA	NA	Rufy1_exon_chr10:35883460
2	Rufy1									Rufy1_exon_chr10:35892396	0.4683	0.2918	-0.1765	NA	1	NA	NA	NA	NA	Rufy1_exon_chr10:35892396
3	Rufy1									Rufy1_exon_chr10:35895934	0.0269	0.1101	0.0833	NA	1	NA	NA	NA	NA	Rufy1_exon_chr10:35895934
4	Rufy1									Rufy1_exon_chr10:35901897	0.0907	0.0427	-0.048	NA	1	NA	NA	NA	NA	Rufy1_exon_chr10:35901897
5	Rufy1									Rufy1_exon_chr10:35908082	0.0046	0.0225	0.0178	NA	1	NA	NA	NA	NA	Rufy1_exon_chr10:35908082
6	Rufy1									Rufy1_intron_chr10:35913842	0.1584	0.0698	-0.0886	NA	1	NA	NA	NA	NA	Rufy1_intron_chr10:35913842
1	Zfp879	3.0159	13.3883	2.165	1.0	NC	No	No	1	Zfp879_exon_chr10:36328515	1.0	1.0	0.0	NA	2	NA	NA	0.0012	NA	Zfp879_exon_chr10:36328515
1	Sec24a	31.6113	167.833	2.4109	0.0221	UP	No	Yes	4	Sec24a_exon_chr10:37141520	0.1771	0.9172	0.7401	Up	2	NA	NA	-0.1439	Shortening	Sec24a_exon_chr10:37141520
2	Sec24a									Sec24a_exon_chr10:37194876	0.0646	0.0	-0.0646	NA	1	NA	NA	NA	NA	Sec24a_exon_chr10:37194876
3	Sec24a									Sec24a_intron_chr10:37180937	0.1878	0.043	-0.1448	NA	1	NA	NA	NA	NA	Sec24a_intron_chr10:37180937
4	Sec24a									Sec24a_intron_chr10:37194411	0.5706	0.0398	-0.5307	NA	3	NA	NA	-0.2887	NA	Sec24a_intron_chr10:37194411
1	Jade2	33.1281	19.7128	-0.7748	0.6972	NC	No	No	2	Jade2_exon_chr10:37271397	0.0	0.0447	0.0447	NA	1	NA	NA	NA	NA	Jade2_exon_chr10:37271397
2	Jade2									Jade2_exon_chr10:37272188	1.0	0.9553	-0.0447	NA	2	NA	NA	-0.3287	NA	Jade2_exon_chr10:37272188
1	Ube2b	451.9863	378.4316	-0.2528	0.5811	NC	No	Yes	2	Ube2b_exon_chr10:37441611	0.4974	0.5039	0.0065	NA	8	0.6667	0.3028	-0.364	Shortening	Ube2b_exon_chr10:37441611
2	Ube2b									Ube2b_exon_chrUn:AABR07024291v1	0.5026	0.4961	-0.0065	NA	9	0.67	0.2968	-0.3732	Shortening	Ube2b_exon_chrUn:AABR07024291v1
1	Ppp2ca	260.2544	411.6866	0.6593	0.031	UP	No	Yes	1	Ppp2ca_exon_chr10:37535943	1.0	1.0	0.0	NA	4	0.8803	0.776	-0.1043	Both	Ppp2ca_exon_chr10:37535943
1	Hspa4	1200.3596	926.9718	-0.3725	0.2062	NC	No	Yes	7	Hspa4_exon_chr10:38603599	0.5373	0.6682	0.1309	NA	2	0.3514	0.0159	-0.3355	Shortening	Hspa4_exon_chr10:38603599
2	Hspa4									Hspa4_exon_chr10:38604113	0.0147	0.0007	-0.014	NA	2	NA	NA	-0.0852	NA	Hspa4_exon_chr10:38604113
3	Hspa4									Hspa4_exon_chr10:38604685	0.0082	0.014	0.0058	NA	1	NA	NA	NA	NA	Hspa4_exon_chr10:38604685
4	Hspa4									Hspa4_exon_chr10:38608941	0.1562	0.1413	-0.015	NA	1	NA	NA	NA	NA	Hspa4_exon_chr10:38608941
5	Hspa4									Hspa4_exon_chr10:38612149	0.0606	0.0533	-0.0073	NA	1	NA	NA	NA	NA	Hspa4_exon_chr10:38612149
6	Hspa4									Hspa4_exon_chr10:38617357	0.1175	0.0749	-0.0426	NA	1	NA	NA	NA	NA	Hspa4_exon_chr10:38617357
7	Hspa4									Hspa4_exon_chr10:38623052	0.105	0.0408	-0.0642	NA	1	NA	NA	NA	NA	Hspa4_exon_chr10:38623052
1	Uqcrq	1184.3513	1416.7391	0.2603	0.4088	NC	No	No	1	Uqcrq_exon_chr10:38780353	1.0	1.0	0.0	NA	1	NA	NA	NA	NA	Uqcrq_exon_chr10:38780353
1	Rad50	605.5116	400.6229	-0.5995	0.1477	NC	No	No	12	Rad50_exon_chr10:39002666	0.015	0.0297	0.0147	NA	2	NA	NA	0.3358	NA	Rad50_exon_chr10:39002666
2	Rad50									Rad50_exon_chr10:39021180	0.2062	0.2587	0.0525	NA	1	NA	NA	NA	NA	Rad50_exon_chr10:39021180
3	Rad50									Rad50_exon_chr10:39026198	0.1268	0.1063	-0.0205	NA	2	0.9737	0.9629	-0.0108	NA	Rad50_exon_chr10:39026198
4	Rad50									Rad50_exon_chr10:39026371	0.0709	0.0357	-0.0352	NA	2	NA	NA	-0.1745	NA	Rad50_exon_chr10:39026371
5	Rad50									Rad50_exon_chr10:39027166	0.2006	0.1116	-0.089	NA	1	NA	NA	NA	NA	Rad50_exon_chr10:39027166
6	Rad50									Rad50_exon_chr10:39031227	0.0139	0.0198	0.006	NA	1	NA	NA	NA	NA	Rad50_exon_chr10:39031227
7	Rad50									Rad50_exon_chr10:39034279	0.0733	0.1441	0.0708	NA	1	NA	NA	NA	NA	Rad50_exon_chr10:39034279
8	Rad50									Rad50_exon_chr10:39035118	0.0819	0.0957	0.0138	NA	2	0.2865	0.2941	0.0076	NA	Rad50_exon_chr10:39035118
9	Rad50									Rad50_exon_chr10:39037340	0.0454	0.0054	-0.0399	NA	1	NA	NA	NA	NA	Rad50_exon_chr10:39037340
10	Rad50									Rad50_exon_chr10:39038705	0.1107	0.0798	-0.0309	NA	2	0.9142	0.9939	0.0797	NA	Rad50_exon_chr10:39038705
11	Rad50									Rad50_exon_chr10:39043634	0.0417	0.091	0.0493	NA	1	NA	NA	NA	NA	Rad50_exon_chr10:39043634
12	Rad50									Rad50_exon_chr10:39049723	0.0016	0.014	0.0124	NA	1	NA	NA	NA	NA	Rad50_exon_chr10:39049723
1	Slc22a5	3.8206	12.6343	1.6935	1.0	NC	No	No	1	Slc22a5_exon_chr10:39202437	1.0	1.0	0.0	NA	1	NA	NA	NA	NA	Slc22a5_exon_chr10:39202437
1	Pdlim4	53.4954	63.1103	0.2315	0.9282	NC	No	No	1	Pdlim4_exon_chr10:39390899	1.0	1.0	0.0	NA	2	0.0556	0.0314	-0.0242	NA	Pdlim4_exon_chr10:39390899
1	Cdc42se2	78.7363	222.6588	1.5081	0.0033	UP	No	Yes	2	Cdc42se2_exon_chr10:40056563	0.6124	0.9375	0.3251	Up	6	0.6501	0.2961	-0.3541	Both	Cdc42se2_exon_chr10:40056563
2	Cdc42se2									Cdc42se2_intron_chr10:40092533	0.3876	0.0609	-0.3267	NA	1	NA	NA	NA	NA	Cdc42se2_intron_chr10:40092533
1	Lyrm7	93.9146	38.0179	-1.3176	0.1079	NC	No	No	2	Lyrm7_exon_chr10:40184605	0.9876	0.9904	0.0028	NA	3	0.9201	0.6485	-0.2715	NA	Lyrm7_exon_chr10:40184605
2	Lyrm7									Lyrm7_exon_chr10:40195382	0.0124	0.0096	-0.0028	NA	1	NA	NA	NA	NA	Lyrm7_exon_chr10:40195382
1	Tnip1	106.6413	183.4638	0.7844	0.0972	UP	No	No	2	Tnip1_exon_chr10:40256560	0.934	0.9845	0.0505	NA	1	NA	NA	NA	NA	Tnip1_exon_chr10:40256560
2	Tnip1									Tnip1_intron_chr10:40293098	0.066	0.0155	-0.0505	NA	1	NA	NA	NA	NA	Tnip1_intron_chr10:40293098
1	Anxa6	1684.8925	1684.6492	-0.0005	0.9208	NC	No	No	4	Anxa6_exon_chr10:40321137	0.8819	0.8528	-0.029	NA	4	0.3618	0.2977	-0.0641	NA	Anxa6_exon_chr10:40321137
2	Anxa6									Anxa6_intron_chr10:40343134	0.0186	0.0242	0.0056	NA	1	NA	NA	NA	NA	Anxa6_intron_chr10:40343134
3	Anxa6									Anxa6_intron_chr10:40346227	0.0427	0.0488	0.006	NA	1	NA	NA	NA	NA	Anxa6_intron_chr10:40346227
4	Anxa6									Anxa6_intron_chr10:40375525	0.0522	0.065	0.0129	NA	3	0.0501	0.1555	0.1053	NA	Anxa6_intron_chr10:40375525
1	Ybx1-ps3	458.4295	2353.4067	2.3634	0.0	UP	No	Yes	1	Ybx1-ps3_exon_chr10:40381897	1.0	1.0	0.0	NA	6	0.7446	0.802	0.0574	Both	Ybx1-ps3_exon_chr10:40381897
1	Sparc	8442.0144	10607.9109	0.3295	0.3081	NC	No	No	1	Sparc_exon_chr10:40743490	1.0	1.0	0.0	NA	7	0.9823	0.9743	-0.008	NA	Sparc_exon_chr10:40743490
1	Atox1	232.6789	445.6393	0.9396	0.0274	UP	No	No	1	Atox1_exon_chr10:40790993	1.0	1.0	0.0	NA	1	NA	NA	NA	NA	Atox1_exon_chr10:40790993
1	Gemin5	46.6242	71.6405	0.6112	0.6263	NC	No	No	4	Gemin5_exon_chr10:43554641	0.597	0.6619	0.0649	NA	1	NA	NA	NA	NA	Gemin5_exon_chr10:43554641
2	Gemin5									Gemin5_exon_chr10:43558143	0.1772	0.1912	0.0139	NA	1	NA	NA	NA	NA	Gemin5_exon_chr10:43558143
3	Gemin5									Gemin5_exon_chr10:43575694	0.0737	0.005	-0.0687	NA	1	NA	NA	NA	NA	Gemin5_exon_chr10:43575694
4	Gemin5									Gemin5_intron_chr10:43563127	0.1521	0.1419	-0.0102	NA	1	NA	NA	NA	NA	Gemin5_intron_chr10:43563127
1	Zfp672	25.6119	26.5102	0.0501	1.0	NC	No	No	1	Zfp672_exon_chr10:43755329	1.0	1.0	0.0	NA	4	NA	NA	-0.06	NA	Zfp672_exon_chr10:43755329
1	LOC691286	3.1044	2.4084	-0.4983	1.0	NC	No	No	1	LOC691286_intron_chr10:43885315	1.0	1.0	0.0	NA	1	NA	NA	NA	NA	LOC691286_intron_chr10:43885315
1	Natd1	56.8781	75.7721	0.4009	0.7903	NC	No	No	2	Natd1_exon_chr10:45064618	0.4845	0.4938	0.0093	NA	3	0.9742	0.8674	-0.1068	NA	Natd1_exon_chr10:45064618
2	Natd1									Natd1_exon_chr10:47157597	0.5155	0.5062	-0.0093	NA	3	0.9747	0.8696	-0.1051	NA	Natd1_exon_chr10:47157597
1	LOC103693340	14.5059	21.508	0.581	1.0	NC	No	No	3	LOC103693340_exon_chr10:45079661	0.2041	0.3997	0.1956	NA	1	NA	NA	NA	NA	LOC103693340_exon_chr10:45079661
2	LOC103693340									LOC103693340_exon_chr10:47172639	0.1703	0.3997	0.2294	NA	1	NA	NA	NA	NA	LOC103693340_exon_chr10:47172639
3	LOC103693340									LOC103693340_intron_chr10:45088961	0.6256	0.2006	-0.425	NA	1	NA	NA	NA	NA	LOC103693340_intron_chr10:45088961
1	Zfp39	9.3757	0.0	-5.8719	1.0	NC	No	No	1	Zfp39_exon_chr10:45223924	1.0	1.0	0.0	NA	2	NA	NA	-0.3538	NA	Zfp39_exon_chr10:45223924
1	Rnf187	79.3575	126.4661	0.6783	0.3074	NC	No	No	1	Rnf187_exon_chr10:45274505	1.0	1.0	0.0	NA	1	NA	NA	NA	NA	Rnf187_exon_chr10:45274505
1	Iba57	6.4719	3.3487	-0.947	1.0	NC	No	No	1	Iba57_exon_chr10:45507731	1.0	1.0	0.0	NA	1	NA	NA	NA	NA	Iba57_exon_chr10:45507731
1	Guk1	242.529	248.1332	0.0387	0.9363	NC	No	No	2	Guk1_exon_chr10:45535949	0.996	0.9794	-0.0166	NA	1	NA	NA	NA	NA	Guk1_exon_chr10:45535949
2	Guk1									Guk1_intron_chr10:45543832	0.004	0.0206	0.0166	NA	1	NA	NA	NA	NA	Guk1_intron_chr10:45543832
1	Arf1	70.1976	75.5661	0.1123	1.0	NC	No	No	3	Arf1_exon_chr10:45563985	0.8994	0.9088	0.0094	NA	3	1.0	0.6464	-0.3536	NA	Arf1_exon_chr10:45563985
2	Arf1									Arf1_exon_chr10:45564796	0.0209	0.0251	0.0042	NA	1	NA	NA	NA	NA	Arf1_exon_chr10:45564796
3	Arf1									Arf1_intron_chr10:45578991	0.0798	0.0661	-0.0136	NA	1	NA	NA	NA	NA	Arf1_intron_chr10:45578991
1	Snap47	34.6101	34.5814	-0.0058	1.0	NC	No	No	2	Snap47_exon_chr10:45757723	0.9158	1.0	0.0842	NA	1	NA	NA	NA	NA	Snap47_exon_chr10:45757723
2	Snap47									Snap47_intron_chr10:45771831	0.0842	0.0	-0.0842	NA	1	NA	NA	NA	NA	Snap47_intron_chr10:45771831
1	Zfp867	9.9409	0.6083	-4.0728	1.0	NC	No	No	1	Zfp867_exon_chr10:45811594	1.0	1.0	0.0	NA	2	NA	NA	-0.6659	NA	Zfp867_exon_chr10:45811594
1	Zfp496	37.1384	62.9348	0.7764	0.6299	NC	No	No	2	Zfp496_exon_chr10:45835545	0.8681	0.9886	0.1206	NA	2	NA	NA	-0.0621	NA	Zfp496_exon_chr10:45835545
2	Zfp496									Zfp496_exon_chr10:45838766	0.1319	0.0114	-0.1206	NA	1	NA	NA	NA	NA	Zfp496_exon_chr10:45838766
1	Flcn	48.1538	29.0504	-0.7261	0.4068	NC	No	No	2	Flcn_exon_chr10:46154194	0.9636	1.0	0.0364	NA	1	NA	NA	NA	NA	Flcn_exon_chr10:46154194
2	Flcn									Flcn_intron_chr10:46164858	0.0364	0.0	-0.0364	NA	1	NA	NA	NA	NA	Flcn_intron_chr10:46164858
1	Cops3	268.5058	217.9019	-0.3004	0.5763	NC	No	No	2	Cops3_exon_chr10:46182987	0.9644	0.9879	0.0234	NA	2	0.5004	0.6077	0.1073	NA	Cops3_exon_chr10:46182987
2	Cops3									Cops3_intron_chr10:46191359	0.0356	0.0121	-0.0234	NA	1	NA	NA	NA	NA	Cops3_intron_chr10:46191359
1	Srebf1	89.2556	79.4034	-0.1696	0.8751	NC	No	No	1	Srebf1_exon_chr10:46572117	1.0	1.0	0.0	NA	2	0.2252	0.0635	-0.1617	NA	Srebf1_exon_chr10:46572117
1	Tom1l2	3.0159	3.0357	0.0086	1.0	NC	No	No	1	Tom1l2_intron_chr10:46720767	1.0	1.0	0.0	NA	2	NA	NA	NA	NA	Tom1l2_intron_chr10:46720767
1	Atpaf2	65.0068	45.9032	-0.5175	0.6448	NC	No	No	1	Atpaf2_exon_chr10:46769107	1.0	1.0	0.0	NA	1	NA	NA	NA	NA	Atpaf2_exon_chr10:46769107
1	Flii	210.7842	280.5922	0.413	0.3389	NC	No	No	3	Flii_exon_chr10:46955784	0.8695	0.8423	-0.0272	NA	1	NA	NA	NA	NA	Flii_exon_chr10:46955784
2	Flii									Flii_exon_chr10:46958662	0.018	0.0	-0.018	NA	1	NA	NA	NA	NA	Flii_exon_chr10:46958662
3	Flii									Flii_exon_chr10:46960004	0.1125	0.1577	0.0452	NA	2	0.1848	0.1577	-0.0271	NA	Flii_exon_chr10:46960004
1	Shmt1	35.6522	36.5378	0.0408	1.0	NC	No	No	1	Shmt1_exon_chr10:47031222	1.0	1.0	0.0	NA	1	NA	NA	NA	NA	Shmt1_exon_chr10:47031222
1	Tmem11	183.5442	130.6646	-0.4938	0.3326	NC	No	No	1	Tmem11_exon_chr10:47118026	1.0	1.0	0.0	NA	1	NA	NA	NA	NA	Tmem11_exon_chr10:47118026
1	Aldh3a2	35.2143	32.0816	-0.1623	1.0	NC	No	No	1	Aldh3a2_exon_chr10:47526909	1.0	1.0	0.0	NA	2	NA	NA	0.0276	NA	Aldh3a2_exon_chr10:47526909
1	Mapk7	58.3229	90.5019	0.6453	0.5128	NC	No	No	2	Mapk7_exon_chr10:47769044	0.4957	0.4926	-0.0031	NA	2	0.1163	0.0331	-0.0832	NA	Mapk7_exon_chr10:47769044
2	Mapk7									Mapk7_exon_chr10:49004495	0.5043	0.5074	0.0031	NA	2	0.117	0.0334	-0.0836	NA	Mapk7_exon_chr10:49004495
1	Epn2	86.2242	111.0135	0.3638	0.7527	NC	No	No	2	Epn2_exon_chr10:47797923	0.9368	0.926	-0.0108	NA	4	0.4624	0.5957	0.1333	NA	Epn2_exon_chr10:47797923
2	Epn2									Epn2_exon_chr10:47811327	0.0632	0.074	0.0108	NA	1	NA	NA	NA	NA	Epn2_exon_chr10:47811327
1	Prpsap2	25.7347	60.2496	1.2274	0.289	NC	No	No	2	Prpsap2_exon_chr10:48009446	0.8046	1.0	0.1954	NA	2	0.0784	0.1728	0.0944	NA	Prpsap2_exon_chr10:48009446
2	Prpsap2									Prpsap2_intron_chr10:48044254	0.1954	0.0	-0.1954	NA	1	NA	NA	NA	NA	Prpsap2_intron_chr10:48044254
1	Ulk2	68.4607	125.0498	0.8836	0.1457	NC	No	No	6	Ulk2_exon_chr10:48052773	0.4604	0.7805	0.3201	Up	7	0.7116	0.3649	-0.3468	NA	Ulk2_exon_chr10:48052773
2	Ulk2									Ulk2_exon_chr10:48056950	0.0	0.033	0.033	NA	1	NA	NA	NA	NA	Ulk2_exon_chr10:48056950
3	Ulk2									Ulk2_exon_chr10:48127708	0.249	0.1094	-0.1396	NA	1	NA	NA	NA	NA	Ulk2_exon_chr10:48127708
4	Ulk2									Ulk2_intron_chr10:48061212	0.1864	0.052	-0.1344	NA	1	NA	NA	NA	NA	Ulk2_intron_chr10:48061212
5	Ulk2									Ulk2_intron_chr10:48094170	0.0542	0.0251	-0.0292	NA	1	NA	NA	NA	NA	Ulk2_intron_chr10:48094170
6	Ulk2									Ulk2_intron_chr10:48128771	0.05	0.0	-0.05	NA	1	NA	NA	NA	NA	Ulk2_intron_chr10:48128771
1	Akap10	52.4513	59.0628	0.1543	0.9189	NC	No	No	7	Akap10_exon_chr10:48152215	0.1929	0.4224	0.2295	NA	1	NA	NA	NA	NA	Akap10_exon_chr10:48152215
2	Akap10									Akap10_exon_chr10:48193738	0.1611	0.0	-0.1611	NA	1	NA	NA	NA	NA	Akap10_exon_chr10:48193738
3	Akap10									Akap10_exon_chr10:48194542	0.2442	0.3581	0.1139	NA	1	NA	NA	NA	NA	Akap10_exon_chr10:48194542
4	Akap10									Akap10_intron_chr10:48175698	0.0186	0.0	-0.0186	NA	1	NA	NA	NA	NA	Akap10_intron_chr10:48175698
5	Akap10									Akap10_intron_chr10:48178919	0.2352	0.0884	-0.1468	NA	1	NA	NA	NA	NA	Akap10_intron_chr10:48178919
6	Akap10									Akap10_intron_chr10:48188214	0.0383	0.115	0.0767	NA	1	NA	NA	NA	NA	Akap10_intron_chr10:48188214
7	Akap10									Akap10_intron_chr10:48200800	0.1097	0.0161	-0.0936	NA	3	NA	NA	-0.0026	NA	Akap10_intron_chr10:48200800
1	Zswim7	11.5222	6.0702	-0.9044	1.0	NC	No	No	1	Zswim7_exon_chr10:48587497	1.0	1.0	0.0	NA	1	NA	NA	NA	NA	Zswim7_exon_chr10:48587497
1	Ncor1	3601.7297	2119.3086	-0.7662	0.0565	DOWN	No	No	6	Ncor1_exon_chr10:48630141	0.0497	0.1121	0.0624	NA	6	0.3714	0.2857	-0.0857	NA	Ncor1_exon_chr10:48630141
2	Ncor1									Ncor1_exon_chr10:48696065	0.0204	0.0191	-0.0013	NA	1	NA	NA	NA	NA	Ncor1_exon_chr10:48696065
3	Ncor1									Ncor1_exon_chr10:48699934	0.5228	0.5429	0.02	NA	1	NA	NA	NA	NA	Ncor1_exon_chr10:48699934
4	Ncor1									Ncor1_exon_chr10:48714344	0.277	0.2048	-0.0722	NA	2	0.992	0.9778	-0.0142	NA	Ncor1_exon_chr10:48714344
5	Ncor1									Ncor1_exon_chr10:48717119	0.0385	0.0536	0.0151	NA	1	NA	NA	NA	NA	Ncor1_exon_chr10:48717119
6	Ncor1									Ncor1_exon_chr10:48735877	0.0734	0.0405	-0.0329	NA	1	NA	NA	NA	NA	Ncor1_exon_chr10:48735877
1	Zfp287	19.7549	27.3482	0.4662	1.0	NC	No	No	2	Zfp287_exon_chr10:49136856	1.0	0.6338	-0.3662	NA	6	NA	NA	-0.2184	NA	Zfp287_exon_chr10:49136856
2	Zfp287									Zfp287_intron_chr10:49149076	0.0	0.3662	0.3662	NA	1	NA	NA	NA	NA	Zfp287_intron_chr10:49149076
1	Myocd	90.8797	151.4241	0.7326	0.3332	NC	No	No	4	Myocd_exon_chr10:51685998	0.1691	0.4749	0.3058	Up	3	NA	NA	0.0059	NA	Myocd_exon_chr10:51685998
2	Myocd									Myocd_intron_chr10:51727766	0.1622	0.0769	-0.0853	NA	1	NA	NA	NA	NA	Myocd_intron_chr10:51727766
3	Myocd									Myocd_intron_chr10:51739049	0.0913	0.0	-0.0913	NA	1	NA	NA	NA	NA	Myocd_intron_chr10:51739049
4	Myocd									Myocd_intron_chr10:51778689	0.5774	0.4482	-0.1292	NA	9	0.4884	0.457	-0.0314	NA	Myocd_intron_chr10:51778689
1	Map2k4	27.4303	20.9988	-0.3806	1.0	NC	No	No	4	Map2k4_exon_chr10:52218582	0.0551	0.0512	-0.0039	NA	1	NA	NA	NA	NA	Map2k4_exon_chr10:52218582
2	Map2k4									Map2k4_intron_chr10:52218530	0.0711	0.0171	-0.0541	NA	1	NA	NA	NA	NA	Map2k4_intron_chr10:52218530
3	Map2k4									Map2k4_intron_chr10:52244574	0.1101	0.3974	0.2873	NA	1	NA	NA	NA	NA	Map2k4_intron_chr10:52244574
4	Map2k4									Map2k4_intron_chr10:52270480	0.7637	0.5343	-0.2293	NA	3	NA	NA	0.2592	NA	Map2k4_intron_chr10:52270480
1	Adprm	36.9679	26.679	-0.4749	0.7664	NC	No	No	2	Adprm_exon_chr10:53583669	0.3706	0.657	0.2863	NA	1	NA	NA	NA	NA	Adprm_exon_chr10:53583669
2	Adprm									Adprm_intron_chr10:53586716	0.6294	0.343	-0.2863	NA	1	NA	NA	NA	NA	Adprm_intron_chr10:53586716
1	Ndel1	315.1803	201.8193	-0.6391	0.0482	DOWN	No	No	1	Ndel1_exon_chr10:55413110	1.0	1.0	0.0	NA	1	NA	NA	NA	NA	Ndel1_exon_chr10:55413110
1	Rangrf	88.3576	74.234	-0.2504	0.83	NC	No	No	1	Rangrf_exon_chr10:55559306	1.0	1.0	0.0	NA	1	NA	NA	NA	NA	Rangrf_exon_chr10:55559306
1	Tmem88	12.4371	2.0824	-2.597	1.0	NC	No	No	1	Tmem88_exon_chr10:55999876	1.0	1.0	0.0	NA	1	NA	NA	NA	NA	Tmem88_exon_chr10:55999876
1	Kdm6b	42.5186	5.5947	-2.9651	0.9166	NC	No	No	3	Kdm6b_exon_chr10:56001822	0.0712	0.0	-0.0712	NA	1	NA	NA	NA	NA	Kdm6b_exon_chr10:56001822
2	Kdm6b									Kdm6b_exon_chr10:56007891	0.8828	0.8649	-0.0179	NA	1	NA	NA	NA	NA	Kdm6b_exon_chr10:56007891
3	Kdm6b									Kdm6b_intron_chr10:56005305	0.046	0.1351	0.0891	NA	1	NA	NA	NA	NA	Kdm6b_intron_chr10:56005305
1	Wrap53	162.7393	80.5939	-1.0224	0.0468	DOWN	No	No	1	Wrap53_exon_chr10:56169282	1.0	1.0	0.0	NA	1	NA	NA	NA	NA	Wrap53_exon_chr10:56169282
1	Mpdu1	1092.2432	445.4829	-1.297	0.0013	DOWN	No	No	1	Mpdu1_exon_chr10:56262256	1.0	1.0	0.0	NA	1	NA	NA	NA	NA	Mpdu1_exon_chr10:56262256
1	Cd68	9.9841	7.2393	-0.4528	1.0	NC	No	No	1	Cd68_exon_chr10:56269018	1.0	1.0	0.0	NA	1	NA	NA	NA	NA	Cd68_exon_chr10:56269018
1	Eif4a1	9175.9095	5890.4324	-0.6397	0.1439	NC	No	Yes	1	Eif4a1_exon_chr10:56271936	1.0	1.0	0.0	NA	2	0.7569	0.4605	-0.2964	Shortening	Eif4a1_exon_chr10:56271936
1	Senp3	180.1804	157.171	-0.1929	0.8393	NC	No	No	2	Senp3_exon_chr10:56278122	0.9708	1.0	0.0292	NA	4	0.8062	0.817	0.0107	NA	Senp3_exon_chr10:56278122
2	Senp3									Senp3_intron_chr10:56282124	0.0292	0.0	-0.0292	NA	1	NA	NA	NA	NA	Senp3_intron_chr10:56282124
1	Tnfsf12	68.1504	119.0456	0.7937	0.3164	NC	No	No	1	Tnfsf12_exon_chr10:56291526	1.0	1.0	0.0	NA	1	NA	NA	NA	NA	Tnfsf12_exon_chr10:56291526
1	Chrnb1	382.759	397.0133	0.0519	0.8615	NC	No	No	2	Chrnb1_exon_chr10:56391511	0.953	0.9706	0.0176	NA	2	0.9934	0.9636	-0.0298	NA	Chrnb1_exon_chr10:56391511
2	Chrnb1									Chrnb1_intron_chr10:56399576	0.047	0.0294	-0.0176	NA	3	NA	NA	-0.7195	NA	Chrnb1_intron_chr10:56399576
1	Nlgn2	11.4769	7.0939	-0.7031	1.0	NC	No	No	2	Nlgn2_exon_chr10:56433365	0.1314	0.5322	0.4008	NA	2	NA	NA	0.3333	NA	Nlgn2_exon_chr10:56433365
2	Nlgn2									Nlgn2_intron_chr10:56444535	0.8686	0.4678	-0.4008	NA	1	NA	NA	NA	NA	Nlgn2_intron_chr10:56444535
1	LOC497940	16.5316	8.6555	-0.9821	0.5324	NC	No	No	3	LOC497940_exon_chr10:56507688	0.4659	0.6616	0.1957	NA	1	NA	NA	NA	NA	LOC497940_exon_chr10:56507688
2	LOC497940									LOC497940_exon_chr10:56510093	0.2295	0.3384	0.1089	NA	1	NA	NA	NA	NA	LOC497940_exon_chr10:56510093
3	LOC497940									LOC497940_intron_chr10:56507768	0.3046	0.0	-0.3046	NA	1	NA	NA	NA	NA	LOC497940_intron_chr10:56507768
1	Eif5a	2471.5522	3783.7996	0.6152	0.115	NC	No	No	1	Eif5a_exon_chr10:56527693	1.0	1.0	0.0	NA	3	0.7783	0.7723	-0.006	NA	Eif5a_exon_chr10:56527693
1	Slc2a4	62.4956	59.5065	-0.0792	1.0	NC	No	No	3	Slc2a4_exon_chr10:56554022	0.7571	0.3424	-0.4147	NA	1	NA	NA	NA	NA	Slc2a4_exon_chr10:56554022
2	Slc2a4									Slc2a4_intron_chr10:56554489	0.1171	0.2576	0.1405	NA	2	NA	NA	0.0934	NA	Slc2a4_intron_chr10:56554489
3	Slc2a4									Slc2a4_intron_chr10:56555669	0.1258	0.4001	0.2742	NA	1	NA	NA	NA	NA	Slc2a4_intron_chr10:56555669
1	Elp5	361.4286	319.8882	-0.1774	0.6452	NC	No	No	2	Elp5_exon_chr10:56579314	0.9447	0.9129	-0.0318	NA	1	NA	NA	NA	NA	Elp5_exon_chr10:56579314
2	Elp5									Elp5_intron_chr10:56584999	0.0553	0.0871	0.0318	NA	5	NA	NA	-0.2909	NA	Elp5_intron_chr10:56584999
1	Acadvl	30.4939	25.3531	-0.2542	1.0	NC	No	No	1	Acadvl_exon_chr10:56619576	1.0	1.0	0.0	NA	2	0.4947	0.2316	-0.2631	NA	Acadvl_exon_chr10:56619576
1	Slc16a13	127.6514	86.2664	-0.5642	0.3627	NC	No	No	2	Slc16a13_exon_chr10:56828130	0.9222	0.9194	-0.0028	NA	2	0.4896	0.5041	0.0145	NA	Slc16a13_exon_chr10:56828130
2	Slc16a13									Slc16a13_exon_chr10:56829638	0.0778	0.0806	0.0028	NA	1	NA	NA	NA	NA	Slc16a13_exon_chr10:56829638
1	RGD1308134	167.9031	110.6592	-0.597	0.392	NC	No	No	1	RGD1308134_exon_chr10:56845709	1.0	1.0	0.0	NA	1	NA	NA	NA	NA	RGD1308134_exon_chr10:56845709
1	Rnasek	453.0481	361.599	-0.3259	0.453	NC	No	No	1	Rnasek_exon_chr10:56848709	1.0	1.0	0.0	NA	1	NA	NA	NA	NA	Rnasek_exon_chr10:56848709
1	Pelp1	58.6881	60.5895	0.0373	1.0	NC	No	No	2	Pelp1_exon_chr10:56988219	0.7279	0.9412	0.2133	NA	1	NA	NA	NA	NA	Pelp1_exon_chr10:56988219
2	Pelp1									Pelp1_exon_chr10:56989957	0.2721	0.0588	-0.2133	NA	2	NA	NA	-0.0563	NA	Pelp1_exon_chr10:56989957
1	Cxcl16	39.3346	65.814	0.7351	0.4946	NC	No	No	1	Cxcl16_exon_chr10:57060731	1.0	1.0	0.0	NA	3	0.7491	0.5873	-0.1618	NA	Cxcl16_exon_chr10:57060731
1	Slc25a11	40.0895	92.0071	1.2036	0.2038	NC	No	No	1	Slc25a11_exon_chr10:57266058	1.0	1.0	0.0	NA	2	0.9159	0.9043	-0.0116	NA	Slc25a11_exon_chr10:57266058
1	Pfn1	5460.8764	4002.9076	-0.4483	0.545	NC	No	No	1	Pfn1_exon_chr10:57273378	1.0	1.0	0.0	NA	1	NA	NA	NA	NA	Pfn1_exon_chr10:57273378
1	Spag7	71.7373	35.1012	-1.0333	0.22	NC	No	No	3	Spag7_exon_chr10:57285501	0.7475	0.9283	0.1807	NA	2	0.9156	1.0	0.0844	NA	Spag7_exon_chr10:57285501
2	Spag7									Spag7_exon_chr10:57286337	0.1613	0.0717	-0.0896	NA	1	NA	NA	NA	NA	Spag7_exon_chr10:57286337
3	Spag7									Spag7_exon_chr10:57286606	0.0912	0.0	-0.0912	NA	1	NA	NA	NA	NA	Spag7_exon_chr10:57286606
1	Camta2	46.0377	43.8044	-0.0734	1.0	NC	No	No	1	Camta2_exon_chr10:57291971	1.0	1.0	0.0	NA	1	NA	NA	NA	NA	Camta2_exon_chr10:57291971
1	Nup88	526.5111	349.719	-0.5937	0.0534	DOWN	No	No	3	Nup88_exon_chr10:57582057	0.6218	0.8062	0.1844	NA	2	0.9955	0.8873	-0.1082	NA	Nup88_exon_chr10:57582057
2	Nup88									Nup88_exon_chr10:57582777	0.0727	0.0549	-0.0178	NA	1	NA	NA	NA	NA	Nup88_exon_chr10:57582777
3	Nup88									Nup88_exon_chr10:57583347	0.2964	0.1364	-0.16	NA	1	NA	NA	NA	NA	Nup88_exon_chr10:57583347
1	C1qbp	609.3267	663.0987	0.1242	0.8104	NC	No	No	2	C1qbp_exon_chr10:57614273	0.6027	0.6925	0.0898	NA	1	NA	NA	NA	NA	C1qbp_exon_chr10:57614273
2	C1qbp									C1qbp_exon_chr10:57617873	0.3934	0.3075	-0.086	NA	1	NA	NA	NA	NA	C1qbp_exon_chr10:57617873
1	Med31	48.9393	54.0585	0.1438	0.969	NC	No	No	1	Med31_exon_chr10:58781354	1.0	1.0	0.0	NA	1	NA	NA	NA	NA	Med31_exon_chr10:58781354
1	Slc13a5	3.0159	0.0	-4.2267	1.0	NC	No	No	1	Slc13a5_intron_chr10:58817575	1.0	1.0	0.0	NA	1	NA	NA	NA	NA	Slc13a5_intron_chr10:58817575
1	Tekt1	18.6803	18.0836	-0.0445	1.0	NC	No	No	1	Tekt1_exon_chr10:58895935	1.0	1.0	0.0	NA	1	NA	NA	NA	NA	Tekt1_exon_chr10:58895935
1	Smtnl2	17.5972	9.2533	-0.915	1.0	NC	No	No	1	Smtnl2_exon_chr10:58952975	1.0	1.0	0.0	NA	1	NA	NA	NA	NA	Smtnl2_exon_chr10:58952975
1	Cyb5d2	4.8259	2.9198	-0.7284	1.0	NC	No	No	1	Cyb5d2_exon_chr10:59345139	1.0	1.0	0.0	NA	1	NA	NA	NA	NA	Cyb5d2_exon_chr10:59345139
1	Emc6	127.039	127.5675	0.0148	1.0	NC	No	Yes	1	Emc6_exon_chr10:59743037	1.0	1.0	0.0	NA	2	0.2611	0.0264	-0.2347	Shortening	Emc6_exon_chr10:59743037
1	Pafah1b1	330.5512	605.7989	0.8731	0.0078	UP	No	Yes	5	Pafah1b1_exon_chr10:61459923	0.7006	0.8224	0.1218	Up	7	0.1197	0.0201	-0.0996	Both	Pafah1b1_exon_chr10:61459923
2	Pafah1b1									Pafah1b1_exon_chr10:61477055	0.0503	0.0154	-0.0349	NA	1	NA	NA	NA	NA	Pafah1b1_exon_chr10:61477055
3	Pafah1b1									Pafah1b1_exon_chr10:61483594	0.1666	0.1223	-0.0444	NA	2	0.4056	0.3522	-0.0534	NA	Pafah1b1_exon_chr10:61483594
4	Pafah1b1									Pafah1b1_exon_chr10:61498597	0.0318	0.0029	-0.0289	NA	1	NA	NA	NA	NA	Pafah1b1_exon_chr10:61498597
5	Pafah1b1									Pafah1b1_intron_chr10:61464685	0.0506	0.037	-0.0136	NA	1	NA	NA	NA	NA	Pafah1b1_intron_chr10:61464685
1	Sgsm2	32.595	32.7486	0.0237	1.0	NC	No	No	3	Sgsm2_exon_chr10:61705432	0.6753	0.8416	0.1662	NA	1	NA	NA	NA	NA	Sgsm2_exon_chr10:61705432
2	Sgsm2									Sgsm2_intron_chr10:61712427	0.0627	0.0108	-0.0519	NA	1	NA	NA	NA	NA	Sgsm2_intron_chr10:61712427
3	Sgsm2									Sgsm2_intron_chr10:61740152	0.262	0.1476	-0.1144	NA	1	NA	NA	NA	NA	Sgsm2_intron_chr10:61740152
1	Srr	19.7092	9.678	-1.0363	1.0	NC	No	No	3	Srr_exon_chr10:61757031	0.0	0.8493	0.8493	NA	3	NA	NA	0.5217	NA	Srr_exon_chr10:61757031
2	Srr									Srr_intron_chr10:61766926	0.2279	0.0754	-0.1525	NA	1	NA	NA	NA	NA	Srr_intron_chr10:61766926
3	Srr									Srr_intron_chr10:61772201	0.7721	0.0754	-0.6967	NA	3	NA	NA	-0.329	NA	Srr_intron_chr10:61772201
1	Dph1	3.1044	0.3795	-3.3295	1.0	NC	No	No	2	Dph1_exon_chr10:62020087	0.8392	1.0	0.1608	NA	2	NA	NA	NA	NA	Dph1_exon_chr10:62020087
2	Dph1									Dph1_intron_chr10:62032315	0.1608	0.0	-0.1608	NA	1	NA	NA	NA	NA	Dph1_intron_chr10:62032315
1	Serpinf1	1581.6963	1941.0123	0.2943	0.4811	NC	No	No	1	Serpinf1_exon_chr10:62242120	1.0	1.0	0.0	NA	1	NA	NA	NA	NA	Serpinf1_exon_chr10:62242120
1	Serpinf2	4.1097	0.0	-4.6849	1.0	NC	No	No	1	Serpinf2_exon_chr10:62265306	1.0	1.0	0.0	NA	1	NA	NA	NA	NA	Serpinf2_exon_chr10:62265306
1	Wdr81	44.0698	28.7608	-0.6137	0.7085	NC	No	No	1	Wdr81_exon_chr10:62274955	1.0	1.0	0.0	NA	1	NA	NA	NA	NA	Wdr81_exon_chr10:62274955
1	Git1	23.2949	12.3039	-0.9207	1.0	NC	No	No	1	Git1_exon_chr10:62657083	1.0	1.0	0.0	NA	2	NA	NA	0.2049	NA	Git1_exon_chr10:62657083
1	Coro6	99.7977	83.6816	-0.2598	0.8162	NC	No	No	1	Coro6_exon_chr10:62693052	1.0	1.0	0.0	NA	4	0.9538	1.0	0.0462	NA	Coro6_exon_chr10:62693052
1	Ssh2	32.947	20.9496	-0.642	1.0	NC	No	No	4	Ssh2_exon_chr10:62709049	0.5993	0.6891	0.0898	NA	5	0.6877	0.8615	0.1738	NA	Ssh2_exon_chr10:62709049
2	Ssh2									Ssh2_intron_chr10:62737195	0.0149	0.0393	0.0244	NA	1	NA	NA	NA	NA	Ssh2_intron_chr10:62737195
3	Ssh2									Ssh2_intron_chr10:62751172	0.1333	0.0136	-0.1197	NA	1	NA	NA	NA	NA	Ssh2_intron_chr10:62751172
4	Ssh2									Ssh2_intron_chr10:62814250	0.2525	0.258	0.0055	NA	2	NA	NA	-0.2941	NA	Ssh2_intron_chr10:62814250
1	Blmh	168.5955	204.1958	0.2726	0.588	NC	No	No	1	Blmh_exon_chr10:63198266	1.0	1.0	0.0	NA	2	0.6795	0.4453	-0.2342	NA	Blmh_exon_chr10:63198266
1	Vps53	88.9705	55.655	-0.6774	0.4193	NC	No	No	6	Vps53_exon_chr10:64222577	0.6872	0.4976	-0.1896	NA	2	1.0	0.9374	-0.0626	NA	Vps53_exon_chr10:64222577
2	Vps53									Vps53_exon_chr10:64251818	0.0285	0.3715	0.3431	NA	1	NA	NA	NA	NA	Vps53_exon_chr10:64251818
3	Vps53									Vps53_exon_chr10:64256852	0.0	0.1077	0.1077	NA	1	NA	NA	NA	NA	Vps53_exon_chr10:64256852
4	Vps53									Vps53_exon_chr10:64287811	0.0	0.0168	0.0168	NA	1	NA	NA	NA	NA	Vps53_exon_chr10:64287811
5	Vps53									Vps53_exon_chr10:64306516	0.176	0.0064	-0.1696	Down	1	NA	NA	NA	NA	Vps53_exon_chr10:64306516
6	Vps53									Vps53_intron_chr10:64251222	0.1083	0.0	-0.1083	NA	1	NA	NA	NA	NA	Vps53_intron_chr10:64251222
1	Gemin4	90.7817	81.014	-0.1559	0.9373	NC	No	No	1	Gemin4_exon_chr10:64372160	1.0	1.0	0.0	NA	1	NA	NA	NA	NA	Gemin4_exon_chr10:64372160
1	Glod4	1350.7531	636.9839	-1.0883	0.0025	DOWN	No	No	1	Glod4_exon_chr10:64380480	1.0	1.0	0.0	NA	4	0.931	0.8614	-0.0696	NA	Glod4_exon_chr10:64380480
1	Nxn	61.1061	84.1062	0.4508	0.8227	NC	No	No	3	Nxn_intron_chr10:64425983	0.0333	0.0632	0.03	NA	3	NA	NA	0.1669	NA	Nxn_intron_chr10:64425983
2	Nxn									Nxn_intron_chr10:64427779	0.0246	0.0	-0.0246	NA	1	NA	NA	NA	NA	Nxn_intron_chr10:64427779
3	Nxn									Nxn_intron_chr10:64549913	0.9421	0.9368	-0.0054	NA	11	NA	NA	0.0823	NA	Nxn_intron_chr10:64549913
1	Abr	193.105	85.817	-1.1753	0.0729	DOWN	No	No	4	Abr_exon_chr10:64567555	0.8226	0.7538	-0.0687	NA	1	NA	NA	NA	NA	Abr_exon_chr10:64567555
2	Abr									Abr_intron_chr10:64600134	0.0278	0.0615	0.0337	NA	1	NA	NA	NA	NA	Abr_intron_chr10:64600134
3	Abr									Abr_intron_chr10:64620311	0.1319	0.1847	0.0528	NA	1	NA	NA	NA	NA	Abr_intron_chr10:64620311
4	Abr									Abr_intron_chr10:64656894	0.0177	0.0	-0.0177	NA	1	NA	NA	NA	NA	Abr_intron_chr10:64656894
1	Phf12	54.078	39.9792	-0.4328	0.7662	NC	No	Yes	2	Phf12_exon_chr10:64816688	0.9459	0.9154	-0.0306	NA	2	0.7723	0.0166	-0.7557	Shortening	Phf12_exon_chr10:64816688
2	Phf12									Phf12_intron_chr10:64819931	0.0541	0.0846	0.0306	NA	1	NA	NA	NA	NA	Phf12_intron_chr10:64819931
1	Myo18a	656.0688	190.3332	-1.7912	0.0003	DOWN	No	No	6	Myo18a_exon_chr10:64990524	0.7895	0.7834	-0.0061	NA	1	NA	NA	NA	NA	Myo18a_exon_chr10:64990524
2	Myo18a									Myo18a_exon_chr10:64991934	0.0644	0.0522	-0.0122	NA	1	NA	NA	NA	NA	Myo18a_exon_chr10:64991934
3	Myo18a									Myo18a_exon_chr10:64995348	0.1126	0.0761	-0.0365	NA	1	NA	NA	NA	NA	Myo18a_exon_chr10:64995348
4	Myo18a									Myo18a_exon_chr10:65066693	0.0038	0.0612	0.0573	NA	1	NA	NA	NA	NA	Myo18a_exon_chr10:65066693
5	Myo18a									Myo18a_intron_chr10:64999210	0.0209	0.0019	-0.019	NA	1	NA	NA	NA	NA	Myo18a_intron_chr10:64999210
6	Myo18a									Myo18a_intron_chr10:65019411	0.0069	0.0169	0.01	NA	2	NA	NA	-0.207	NA	Myo18a_intron_chr10:65019411
1	Flot2	121.6528	136.9467	0.1716	0.9363	NC	No	No	1	Flot2_exon_chr10:65306185	1.0	1.0	0.0	NA	1	NA	NA	NA	NA	Flot2_exon_chr10:65306185
1	Rpl23a	7187.8868	5602.0503	-0.3593	0.0904	NC	No	No	2	Rpl23a_exon_chr10:65441365	0.7385	0.8263	0.0879	NA	1	NA	NA	NA	NA	Rpl23a_exon_chr10:65441365
2	Rpl23a									Rpl23a_exon_chr10:65443388	0.2613	0.1725	-0.0888	NA	1	NA	NA	NA	NA	Rpl23a_exon_chr10:65443388
1	Supt6h	395.8882	490.3734	0.3071	0.3816	NC	No	No	4	Supt6h_exon_chr10:65471490	0.417	0.6572	0.2403	Up	5	0.6367	0.6247	-0.012	NA	Supt6h_exon_chr10:65471490
2	Supt6h									Supt6h_exon_chr10:65493831	0.0595	0.0234	-0.0361	NA	1	NA	NA	NA	NA	Supt6h_exon_chr10:65493831
3	Supt6h									Supt6h_exon_chr10:65494905	0.4939	0.3072	-0.1867	NA	2	0.374	0.3673	-0.0066	NA	Supt6h_exon_chr10:65494905
4	Supt6h									Supt6h_exon_chr10:65496698	0.0297	0.01	-0.0196	NA	2	NA	NA	-0.1617	NA	Supt6h_exon_chr10:65496698
1	Sarm1	5.7471	1.5178	-1.9725	1.0	NC	No	No	1	Sarm1_exon_chr10:65744209	1.0	1.0	0.0	NA	1	NA	NA	NA	NA	Sarm1_exon_chr10:65744209
1	Tmem199	131.4503	55.8177	-1.2309	0.0412	DOWN	No	No	1	Tmem199_exon_chr10:65776471	1.0	1.0	0.0	NA	1	NA	NA	NA	NA	Tmem199_exon_chr10:65776471
1	Tnfaip1	217.9639	122.32	-0.8304	0.1724	NC	No	No	1	Tnfaip1_exon_chr10:65793862	1.0	1.0	0.0	NA	2	0.9816	1.0	0.0184	NA	Tnfaip1_exon_chr10:65793862
1	Tmem97	71.5935	233.0883	1.7041	0.0014	UP	No	No	2	Tmem97_exon_chr10:65812409	1.0	0.9899	-0.0101	NA	1	NA	NA	NA	NA	Tmem97_exon_chr10:65812409
2	Tmem97									Tmem97_intron_chr10:65820396	0.0	0.0101	0.0101	NA	1	NA	NA	NA	NA	Tmem97_intron_chr10:65820396
1	Nlk	142.9685	139.1322	-0.039	0.9993	NC	No	Yes	4	Nlk_exon_chr10:65842079	0.6446	0.4498	-0.1948	NA	3	0.8463	0.1517	-0.6945	Shortening	Nlk_exon_chr10:65842079
2	Nlk									Nlk_intron_chr10:65887076	0.0354	0.0534	0.0179	NA	4	NA	NA	-0.2641	NA	Nlk_intron_chr10:65887076
3	Nlk									Nlk_intron_chr10:65896686	0.098	0.2619	0.164	NA	1	NA	NA	NA	NA	Nlk_intron_chr10:65896686
4	Nlk									Nlk_intron_chr10:65962285	0.2219	0.2349	0.013	NA	4	0.3437	0.6625	0.3188	NA	Nlk_intron_chr10:65962285
1	Ksr1	14.5768	15.3136	0.0783	1.0	NC	No	No	2	Ksr1_intron_chr10:66406917	0.4138	0.2478	-0.166	NA	1	NA	NA	NA	NA	Ksr1_intron_chr10:66406917
2	Ksr1									Ksr1_intron_chr10:66481844	0.5862	0.7522	0.166	NA	1	NA	NA	NA	NA	Ksr1_intron_chr10:66481844
1	Wsb1	139.2709	309.5021	1.1615	0.0097	UP	No	No	2	Wsb1_exon_chr10:66587978	0.8553	0.8949	0.0396	NA	4	1.0	0.8813	-0.1187	NA	Wsb1_exon_chr10:66587978
2	Wsb1									Wsb1_intron_chr10:66602846	0.1447	0.1051	-0.0396	NA	4	0.8789	0.8364	-0.0425	NA	Wsb1_intron_chr10:66602846
1	Tefm	8.0597	2.8757	-1.5318	1.0	NC	No	No	1	Tefm_exon_chr10:67476609	1.0	1.0	0.0	NA	1	NA	NA	NA	NA	Tefm_exon_chr10:67476609
1	Myo1d	123.8929	127.9992	0.0539	0.8653	NC	No	No	7	Myo1d_exon_chr10:67869197	0.6843	0.6187	-0.0657	NA	2	0.9378	1.0	0.0622	NA	Myo1d_exon_chr10:67869197
2	Myo1d									Myo1d_intron_chr10:67936672	0.1138	0.1317	0.018	NA	9	NA	NA	-0.0713	NA	Myo1d_intron_chr10:67936672
3	Myo1d									Myo1d_intron_chr10:67965486	0.0	0.0651	0.0651	NA	3	NA	NA	0.3334	NA	Myo1d_intron_chr10:67965486
4	Myo1d									Myo1d_intron_chr10:68016919	0.0236	0.0298	0.0062	NA	4	NA	NA	-0.3333	NA	Myo1d_intron_chr10:68016919
5	Myo1d									Myo1d_intron_chr10:68024486	0.0285	0.0	-0.0285	NA	1	NA	NA	NA	NA	Myo1d_intron_chr10:68024486
6	Myo1d									Myo1d_intron_chr10:68055284	0.033	0.0	-0.033	NA	1	NA	NA	NA	NA	Myo1d_intron_chr10:68055284
7	Myo1d									Myo1d_intron_chr10:68142614	0.1129	0.1491	0.0363	NA	6	NA	NA	0.0838	NA	Myo1d_intron_chr10:68142614
1	Asic2	2.4507	0.0	-3.9486	1.0	NC	No	No	1	Asic2_intron_chr10:68516856	1.0	1.0	0.0	NA	1	NA	NA	NA	NA	Asic2_intron_chr10:68516856
1	Rad51d	18.018	29.6345	0.7273	1.0	NC	No	No	1	Rad51d_exon_chr10:70228686	1.0	1.0	0.0	NA	3	0.7311	0.6535	-0.0776	NA	Rad51d_exon_chr10:70228686
1	Nle1	36.403	32.6861	-0.157	1.0	NC	No	No	1	Nle1_exon_chr10:70251230	1.0	1.0	0.0	NA	1	NA	NA	NA	NA	Nle1_exon_chr10:70251230
1	Slfn13	6.6143	15.148	1.195	1.0	NC	No	No	2	Slfn13_exon_chr10:70337090	0.4692	0.9068	0.4376	NA	1	NA	NA	NA	NA	Slfn13_exon_chr10:70337090
2	Slfn13									Slfn13_intron_chr10:70336023	0.5308	0.0932	-0.4376	NA	3	NA	NA	0.0728	NA	Slfn13_intron_chr10:70336023
1	Pex12	12.1717	47.2634	1.9554	1.0	NC	No	No	2	Pex12_exon_chr10:70514136	0.5	0.506	0.006	NA	2	NA	NA	-0.6515	NA	Pex12_exon_chr10:70514136
2	Pex12									Pex12_exon_chrUn:AABR07024203v1	0.5	0.494	-0.006	NA	2	NA	NA	-0.6494	NA	Pex12_exon_chrUn:AABR07024203v1
1	Mmp28	3.0159	8.9481	1.6033	1.0	NC	No	No	2	Mmp28_intron_chr10:70681561	0.5	0.5	0.0	NA	1	NA	NA	NA	NA	Mmp28_intron_chr10:70681561
2	Mmp28									Mmp28_intron_chrUn:KL568414v1	0.5	0.5	0.0	NA	1	NA	NA	NA	NA	Mmp28_intron_chrUn:KL568414v1
1	Tada2a	53.0056	46.642	-0.1748	0.9363	NC	No	No	3	Tada2a_exon_chr10:71394498	0.8139	0.7846	-0.0293	NA	1	NA	NA	NA	NA	Tada2a_exon_chr10:71394498
2	Tada2a									Tada2a_exon_chr10:71408228	0.0909	0.2154	0.1245	NA	1	NA	NA	NA	NA	Tada2a_exon_chr10:71408228
3	Tada2a									Tada2a_intron_chr10:71405116	0.0952	0.0	-0.0952	NA	1	NA	NA	NA	NA	Tada2a_intron_chr10:71405116
1	Aatf	151.7601	91.839	-0.7324	0.2565	NC	No	No	4	Aatf_exon_chr10:71744807	0.7753	0.7903	0.015	NA	1	NA	NA	NA	NA	Aatf_exon_chr10:71744807
2	Aatf									Aatf_exon_chr10:71797341	0.2247	0.1468	-0.0779	NA	2	NA	NA	0.0241	NA	Aatf_exon_chr10:71797341
3	Aatf									Aatf_exon_chr10:71835080	0.0	0.0117	0.0117	NA	1	NA	NA	NA	NA	Aatf_exon_chr10:71835080
4	Aatf									Aatf_intron_chr10:71834347	0.0	0.0512	0.0512	NA	1	NA	NA	NA	NA	Aatf_intron_chr10:71834347
1	Mrm1	24.8696	37.4615	0.6011	1.0	NC	No	No	2	Mrm1_exon_chr10:72136307	1.0	0.8682	-0.1318	NA	1	NA	NA	NA	NA	Mrm1_exon_chr10:72136307
2	Mrm1									Mrm1_intron_chr10:72141604	0.0	0.1318	0.1318	NA	1	NA	NA	NA	NA	Mrm1_intron_chr10:72141604
1	Dhrs11	11.0261	11.7422	0.083	1.0	NC	No	No	1	Dhrs11_exon_chr10:72144594	1.0	1.0	0.0	NA	1	NA	NA	NA	NA	Dhrs11_exon_chr10:72144594
1	Ggnbp2	487.1929	385.8533	-0.3431	0.2981	NC	No	Yes	4	Ggnbp2_exon_chr10:72157365	0.3511	0.5507	0.1995	NA	4	0.5701	0.4091	-0.161	Shortening	Ggnbp2_exon_chr10:72157365
2	Ggnbp2									Ggnbp2_exon_chr10:72162501	0.5801	0.3864	-0.1936	Down	3	0.6267	0.6624	0.0357	NA	Ggnbp2_exon_chr10:72162501
3	Ggnbp2									Ggnbp2_exon_chr10:72163895	0.0429	0.0336	-0.0093	NA	1	NA	NA	NA	NA	Ggnbp2_exon_chr10:72163895
4	Ggnbp2									Ggnbp2_intron_chr10:72175212	0.0145	0.0267	0.0121	NA	1	NA	NA	NA	NA	Ggnbp2_intron_chr10:72175212
1	Pigw	0.5026	4.9929	3.466	1.0	NC	No	No	1	Pigw_exon_chr10:72196437	1.0	1.0	0.0	NA	2	NA	NA	0.0231	NA	Pigw_exon_chr10:72196437
1	Usp32	92.5859	198.331	1.1111	0.062	UP	No	Yes	4	Usp32_exon_chr10:72302370	0.8201	0.9318	0.1117	Up	3	0.8816	0.1555	-0.7261	Shortening	Usp32_exon_chr10:72302370
2	Usp32									Usp32_intron_chr10:72342252	0.1035	0.0	-0.1035	NA	1	NA	NA	NA	NA	Usp32_intron_chr10:72342252
3	Usp32									Usp32_intron_chr10:72369078	0.0701	0.0476	-0.0225	NA	1	NA	NA	NA	NA	Usp32_intron_chr10:72369078
4	Usp32									Usp32_intron_chr10:72416931	0.0	0.0152	0.0152	NA	1	NA	NA	NA	NA	Usp32_intron_chr10:72416931
1	Appbp2	105.7455	66.0935	-0.6957	0.4123	NC	No	Yes	3	Appbp2_exon_chr10:72507953	0.9788	0.9167	-0.0621	NA	6	0.3669	0.026	-0.341	Both	Appbp2_exon_chr10:72507953
2	Appbp2									Appbp2_intron_chr10:72518117	0.0166	0.0266	0.0101	NA	1	NA	NA	NA	NA	Appbp2_intron_chr10:72518117
3	Appbp2									Appbp2_intron_chr10:72544730	0.0046	0.0567	0.0521	NA	1	NA	NA	NA	NA	Appbp2_intron_chr10:72544730
1	Ints2	73.7464	68.2044	-0.1194	0.9384	NC	No	No	3	Ints2_exon_chr10:73634949	0.9094	0.9481	0.0388	NA	4	0.4657	0.4496	-0.0161	NA	Ints2_exon_chr10:73634949
2	Ints2									Ints2_intron_chr10:73657616	0.0273	0.0466	0.0193	NA	1	NA	NA	NA	NA	Ints2_intron_chr10:73657616
3	Ints2									Ints2_intron_chr10:73688693	0.0634	0.0	-0.0634	NA	1	NA	NA	NA	NA	Ints2_intron_chr10:73688693
1	Med13	59.7862	61.431	0.0408	1.0	NC	No	No	6	Med13_exon_chr10:73703036	0.3078	0.5207	0.213	NA	3	0.7745	0.9464	0.1719	NA	Med13_exon_chr10:73703036
2	Med13									Med13_exon_chr10:73725971	0.0	0.0175	0.0175	NA	1	NA	NA	NA	NA	Med13_exon_chr10:73725971
3	Med13									Med13_exon_chr10:73752645	0.3092	0.0495	-0.2598	NA	1	NA	NA	NA	NA	Med13_exon_chr10:73752645
4	Med13									Med13_intron_chr10:73731365	0.2321	0.0526	-0.1794	NA	3	NA	NA	-0.2337	NA	Med13_intron_chr10:73731365
5	Med13									Med13_intron_chr10:73751961	0.0929	0.0292	-0.0637	NA	3	NA	NA	-0.329	NA	Med13_intron_chr10:73751961
6	Med13									Med13_intron_chr10:73778285	0.058	0.3304	0.2724	NA	1	NA	NA	NA	NA	Med13_intron_chr10:73778285
1	Rps6kb1	58.7662	47.0759	-0.3261	0.9164	NC	No	No	4	Rps6kb1_exon_chr10:73825121	0.7819	0.9771	0.1952	NA	5	0.7011	0.7912	0.0901	NA	Rps6kb1_exon_chr10:73825121
2	Rps6kb1									Rps6kb1_exon_chr10:73837884	0.0333	0.0	-0.0333	NA	1	NA	NA	NA	NA	Rps6kb1_exon_chr10:73837884
3	Rps6kb1									Rps6kb1_exon_chr10:73841651	0.0599	0.0076	-0.0523	NA	1	NA	NA	NA	NA	Rps6kb1_exon_chr10:73841651
4	Rps6kb1									Rps6kb1_exon_chr10:73854280	0.1249	0.0076	-0.1172	NA	1	NA	NA	NA	NA	Rps6kb1_exon_chr10:73854280
1	Mir21	323.3717	360.5635	0.153	0.7532	NC	No	No	1	Mir21_exon_chr10:73902301	1.0	1.0	0.0	NA	2	0.998	0.9868	-0.0112	NA	Mir21_exon_chr10:73902301
1	Vmp1	383.9424	805.2317	1.0723	0.0003	UP	No	No	2	Vmp1_exon_chr10:73903620	0.7136	0.8952	0.1815	Up	3	0.9929	0.9626	-0.0303	NA	Vmp1_exon_chr10:73903620
2	Vmp1									Vmp1_intron_chr10:73920553	0.2864	0.1048	-0.1815	NA	4	0.733	0.6967	-0.0363	NA	Vmp1_intron_chr10:73920553
1	Cltc	1303.1595	919.1354	-0.5059	0.0541	NC	No	No	2	Cltc_exon_chr10:74015629	0.8517	0.8403	-0.0114	NA	6	0.6762	0.661	-0.0153	NA	Cltc_exon_chr10:74015629
2	Cltc									Cltc_exon_chr10:74051474	0.1346	0.1501	0.0155	NA	1	NA	NA	NA	NA	Cltc_exon_chr10:74051474
1	Dhx40	150.7714	173.3564	0.1946	0.823	NC	No	No	4	Dhx40_exon_chr10:74081947	0.9075	0.9003	-0.0072	NA	2	0.1548	0.2188	0.064	NA	Dhx40_exon_chr10:74081947
2	Dhx40									Dhx40_exon_chr10:74118035	0.0444	0.0021	-0.0423	NA	1	NA	NA	NA	NA	Dhx40_exon_chr10:74118035
3	Dhx40									Dhx40_intron_chr10:74088986	0.0	0.0466	0.0466	NA	1	NA	NA	NA	NA	Dhx40_intron_chr10:74088986
4	Dhx40									Dhx40_intron_chr10:74096938	0.0481	0.051	0.0029	NA	1	NA	NA	NA	NA	Dhx40_intron_chr10:74096938
1	Ypel2	2.1616	38.8184	4.11	0.1032	NC	No	No	1	Ypel2_exon_chr10:74245361	1.0	1.0	0.0	NA	2	NA	NA	-0.1002	NA	Ypel2_exon_chr10:74245361
1	Gdpd1	109.0337	140.0431	0.3615	0.7782	NC	No	No	3	Gdpd1_exon_chr10:74335325	0.9864	0.6161	-0.3704	NA	1	NA	NA	NA	NA	Gdpd1_exon_chr10:74335325
2	Gdpd1									Gdpd1_intron_chr10:74336160	0.0091	0.3662	0.3571	Up	3	NA	NA	-0.5817	NA	Gdpd1_intron_chr10:74336160
3	Gdpd1									Gdpd1_intron_chr10:74343129	0.0045	0.0177	0.0133	NA	1	NA	NA	NA	NA	Gdpd1_intron_chr10:74343129
1	Prr11	1.0053	25.8418	4.7727	0.8657	NC	No	No	1	Prr11_exon_chr10:74394184	1.0	1.0	0.0	NA	1	NA	NA	NA	NA	Prr11_exon_chr10:74394184
1	Ppm1e	13.8974	65.2008	2.2351	0.4018	NC	No	No	4	Ppm1e_exon_chr10:74549691	0.2479	0.8344	0.5865	Up	7	NA	NA	0.0813	NA	Ppm1e_exon_chr10:74549691
2	Ppm1e									Ppm1e_intron_chr10:74561963	0.021	0.0	-0.021	NA	1	NA	NA	NA	NA	Ppm1e_intron_chr10:74561963
3	Ppm1e									Ppm1e_intron_chr10:74566741	0.0	0.0317	0.0317	NA	1	NA	NA	NA	NA	Ppm1e_intron_chr10:74566741
4	Ppm1e									Ppm1e_intron_chr10:74679283	0.7311	0.1339	-0.5972	NA	6	NA	NA	-0.3524	NA	Ppm1e_intron_chr10:74679283
1	Rad51c	8.8255	9.6195	0.1963	1.0	NC	No	No	2	Rad51c_exon_chr10:74698610	0.7151	1.0	0.2849	NA	1	NA	NA	NA	NA	Rad51c_exon_chr10:74698610
2	Rad51c									Rad51c_intron_chr10:74722518	0.2849	0.0	-0.2849	NA	1	NA	NA	NA	NA	Rad51c_intron_chr10:74722518
1	Dynll2	262.3683	445.6599	0.767	0.0515	UP	No	Yes	1	Dynll2_exon_chr10:75264468	1.0	1.0	0.0	NA	3	0.4942	0.3396	-0.1546	Shortening	Dynll2_exon_chr10:75264468
1	Akap1	12.3508	4.7942	-1.3696	1.0	NC	No	No	1	Akap1_exon_chr10:76166251	1.0	1.0	0.0	NA	1	NA	NA	NA	NA	Akap1_exon_chr10:76166251
1	Scpep1	205.1388	363.2445	0.8283	0.1681	NC	No	No	4	Scpep1_exon_chr10:76231073	0.8879	0.9922	0.1043	NA	3	0.979	0.9993	0.0203	NA	Scpep1_exon_chr10:76231073
2	Scpep1									Scpep1_exon_chr10:76243150	0.0251	0.002	-0.0232	NA	1	NA	NA	NA	NA	Scpep1_exon_chr10:76243150
3	Scpep1									Scpep1_exon_chr10:76245198	0.0218	0.002	-0.0199	NA	1	NA	NA	NA	NA	Scpep1_exon_chr10:76245198
4	Scpep1									Scpep1_intron_chr10:76243036	0.0652	0.0039	-0.0612	NA	3	NA	NA	0.0626	NA	Scpep1_intron_chr10:76243036
1	Dgke	8.953	0.7589	-3.67	1.0	NC	No	No	2	Dgke_exon_chr10:76387791	0.6602	0.0	-0.6602	NA	1	NA	NA	NA	NA	Dgke_exon_chr10:76387791
2	Dgke									Dgke_intron_chr10:76402291	0.3398	1.0	0.6602	NA	1	NA	NA	NA	NA	Dgke_intron_chr10:76402291
1	Nog	50.2054	9.1294	-2.4611	0.4996	NC	No	No	1	Nog_exon_chr10:76813386	1.0	1.0	0.0	NA	3	NA	NA	-0.2235	NA	Nog_exon_chr10:76813386
1	Stxbp4	3.5185	19.5995	2.5344	1.0	NC	No	No	4	Stxbp4_exon_chr10:78073611	0.1429	0.3147	0.1719	NA	1	NA	NA	NA	NA	Stxbp4_exon_chr10:78073611
2	Stxbp4									Stxbp4_intron_chr10:78027261	0.0	0.0178	0.0178	NA	1	NA	NA	NA	NA	Stxbp4_intron_chr10:78027261
3	Stxbp4									Stxbp4_intron_chr10:78063350	0.8571	0.0357	-0.8215	NA	1	NA	NA	NA	NA	Stxbp4_intron_chr10:78063350
4	Stxbp4									Stxbp4_intron_chr10:78132968	0.0	0.6318	0.6318	NA	1	NA	NA	NA	NA	Stxbp4_intron_chr10:78132968
1	Tom1l1	10.8319	10.5157	-0.0331	1.0	NC	No	No	2	Tom1l1_exon_chr10:78174701	0.5359	0.8333	0.2975	NA	1	NA	NA	NA	NA	Tom1l1_exon_chr10:78174701
2	Tom1l1									Tom1l1_intron_chr10:78175194	0.4641	0.1667	-0.2975	NA	1	NA	NA	NA	NA	Tom1l1_intron_chr10:78175194
1	Utp18	89.9843	84.3393	-0.0948	0.956	NC	No	No	3	Utp18_exon_chr10:81561733	0.6129	0.7559	0.143	NA	4	0.5329	0.0743	-0.4585	NA	Utp18_exon_chr10:81561733
2	Utp18									Utp18_exon_chr10:81567632	0.0217	0.0043	-0.0174	NA	1	NA	NA	NA	NA	Utp18_exon_chr10:81567632
3	Utp18									Utp18_exon_chr10:81584475	0.3654	0.2399	-0.1256	NA	1	NA	NA	NA	NA	Utp18_exon_chr10:81584475
1	Nme2	4277.8701	4243.9366	-0.011	0.956	NC	No	No	1	Nme2_exon_chr10:81648449	1.0	1.0	0.0	NA	1	NA	NA	NA	NA	Nme2_exon_chr10:81648449
1	Nme1	612.4823	920.0262	0.5885	0.1507	NC	No	No	1	Nme1_exon_chr10:81657437	1.0	1.0	0.0	NA	1	NA	NA	NA	NA	Nme1_exon_chr10:81657437
1	Luc7l3	4516.043	3114.8225	-0.5365	0.216	NC	No	No	6	Luc7l3_exon_chr10:81993031	0.0408	0.0781	0.0373	NA	6	0.9734	0.9386	-0.0348	NA	Luc7l3_exon_chr10:81993031
2	Luc7l3									Luc7l3_exon_chr10:81993277	0.0288	0.014	-0.0148	NA	2	1.0	0.8892	-0.1108	NA	Luc7l3_exon_chr10:81993277
3	Luc7l3									Luc7l3_exon_chr10:81996160	0.0897	0.0785	-0.0111	NA	2	0.7633	0.813	0.0497	NA	Luc7l3_exon_chr10:81996160
4	Luc7l3									Luc7l3_exon_chr10:81997350	0.7513	0.7226	-0.0287	NA	3	0.9404	0.9378	-0.0026	NA	Luc7l3_exon_chr10:81997350
5	Luc7l3									Luc7l3_exon_chr10:81998057	0.0656	0.0799	0.0144	NA	1	NA	NA	NA	NA	Luc7l3_exon_chr10:81998057
6	Luc7l3									Luc7l3_exon_chr10:82005561	0.0127	0.0186	0.0059	NA	1	NA	NA	NA	NA	Luc7l3_exon_chr10:82005561
1	Abcc3	37.3434	46.156	0.3292	0.9165	NC	No	No	2	Abcc3_exon_chr10:82047971	1.0	0.9694	-0.0306	NA	1	NA	NA	NA	NA	Abcc3_exon_chr10:82047971
2	Abcc3									Abcc3_intron_chr10:82075118	0.0	0.0306	0.0306	NA	1	NA	NA	NA	NA	Abcc3_intron_chr10:82075118
1	Mycbpap	9.7793	9.47	-0.0744	1.0	NC	No	No	3	Mycbpap_exon_chr10:82232281	0.7391	0.8975	0.1584	NA	1	NA	NA	NA	NA	Mycbpap_exon_chr10:82232281
2	Mycbpap									Mycbpap_exon_chr10:82234259	0.2609	0.0769	-0.184	NA	1	NA	NA	NA	NA	Mycbpap_exon_chr10:82234259
3	Mycbpap									Mycbpap_intron_chr10:82243284	0.0	0.0256	0.0256	NA	1	NA	NA	NA	NA	Mycbpap_intron_chr10:82243284
1	Rsad1	8.545	0.3795	-4.7568	0.5985	NC	No	No	2	Rsad1_exon_chr10:82269292	0.2353	1.0	0.7647	NA	1	NA	NA	NA	NA	Rsad1_exon_chr10:82269292
2	Rsad1									Rsad1_intron_chr10:82271733	0.7647	0.0	-0.7647	NA	1	NA	NA	NA	NA	Rsad1_intron_chr10:82271733
1	Acsf2	14.9633	18.5468	0.3243	1.0	NC	No	No	2	Acsf2_exon_chr10:82285875	0.5978	1.0	0.4022	NA	1	NA	NA	NA	NA	Acsf2_exon_chr10:82285875
2	Acsf2									Acsf2_intron_chr10:82326513	0.4022	0.0	-0.4022	NA	1	NA	NA	NA	NA	Acsf2_intron_chr10:82326513
1	Xylt2	55.5213	32.2388	-0.7881	0.4323	NC	No	No	1	Xylt2_exon_chr10:82387087	1.0	1.0	0.0	NA	1	NA	NA	NA	NA	Xylt2_exon_chr10:82387087
1	Sgca	621.1648	164.2935	-1.9277	0.0	DOWN	Yes	No	2	Sgca_exon_chr10:82771182	0.9879	0.7405	-0.2474	Down	1	NA	NA	NA	NA	Sgca_exon_chr10:82771182
2	Sgca									Sgca_intron_chr10:82784942	0.0121	0.2595	0.2474	Up	1	NA	NA	NA	NA	Sgca_intron_chr10:82784942
1	Pdk2	55.7518	59.7107	0.0998	1.0	NC	No	No	1	Pdk2_exon_chr10:82839293	1.0	1.0	0.0	NA	1	NA	NA	NA	NA	Pdk2_exon_chr10:82839293
1	Itga3	183.0893	92.637	-0.9737	0.0846	DOWN	No	No	2	Itga3_exon_chr10:82857134	0.956	0.9962	0.0402	NA	1	NA	NA	NA	NA	Itga3_exon_chr10:82857134
2	Itga3									Itga3_exon_chr10:82887727	0.044	0.0	-0.044	NA	1	NA	NA	NA	NA	Itga3_exon_chr10:82887727
1	Kat7	51.4371	55.8305	0.1294	0.9382	NC	No	No	1	Kat7_exon_chr10:83096710	1.0	1.0	0.0	NA	1	NA	NA	NA	NA	Kat7_exon_chr10:83096710
1	Igf2bp1	4.8001	127.2633	4.7182	0.5709	NC	No	No	1	Igf2bp1_exon_chr10:83780444	1.0	1.0	0.0	NA	1	NA	NA	NA	NA	Igf2bp1_exon_chr10:83780444
1	Ube2z	174.0363	237.0508	0.4524	0.2414	NC	No	No	2	Ube2z_exon_chr10:83871618	1.0	0.9752	-0.0248	NA	2	0.9805	0.9366	-0.044	NA	Ube2z_exon_chr10:83871618
2	Ube2z									Ube2z_intron_chr10:83884041	0.0	0.0248	0.0248	NA	1	NA	NA	NA	NA	Ube2z_intron_chr10:83884041
1	Atp5mc1	282.5931	353.0482	0.3233	0.4929	NC	No	No	1	Atp5mc1_exon_chr10:83896158	1.0	1.0	0.0	NA	1	NA	NA	NA	NA	Atp5mc1_exon_chr10:83896158
1	Snx11	25.3379	44.4447	0.8176	0.5077	NC	No	No	1	Snx11_exon_chr10:84630216	1.0	1.0	0.0	NA	3	0.7636	0.6396	-0.124	NA	Snx11_exon_chr10:84630216
1	Nfe2l1	3514.7499	2515.122	-0.4833	0.4623	NC	No	No	1	Nfe2l1_exon_chr10:84689845	1.0	1.0	0.0	NA	7	0.9836	0.9255	-0.0582	NA	Nfe2l1_exon_chr10:84689845
1	Cdk5rap3	80.0777	73.9661	-0.1157	0.9551	NC	No	No	1	Cdk5rap3_exon_chr10:84780963	1.0	1.0	0.0	NA	1	NA	NA	NA	NA	Cdk5rap3_exon_chr10:84780963
1	Pnpo	11.2505	12.5634	0.1449	1.0	NC	No	No	1	Pnpo_exon_chr10:84876227	1.0	1.0	0.0	NA	3	NA	NA	-0.2571	NA	Pnpo_exon_chr10:84876227
1	Kpnb1	176.2219	138.4709	-0.3476	0.5667	NC	No	No	2	Kpnb1_exon_chr10:85096777	0.884	0.9833	0.0992	NA	1	NA	NA	NA	NA	Kpnb1_exon_chr10:85096777
2	Kpnb1									Kpnb1_exon_chr10:85097824	0.116	0.0167	-0.0992	NA	1	NA	NA	NA	NA	Kpnb1_exon_chr10:85097824
1	Npepps	426.6858	343.2976	-0.3181	0.3528	NC	No	Yes	4	Npepps_exon_chr10:85141759	0.9508	0.9876	0.0368	NA	4	0.3947	0.1521	-0.2426	Both	Npepps_exon_chr10:85141759
2	Npepps									Npepps_exon_chr10:85148338	0.0167	0.0	-0.0167	NA	1	NA	NA	NA	NA	Npepps_exon_chr10:85148338
3	Npepps									Npepps_intron_chr10:85193094	0.0118	0.0071	-0.0047	NA	2	NA	NA	-0.1554	NA	Npepps_intron_chr10:85193094
4	Npepps									Npepps_intron_chr10:85210095	0.02	0.001	-0.019	NA	2	NA	NA	-0.2505	NA	Npepps_intron_chr10:85210095
1	Pcgf2	6.912	15.5604	1.1675	1.0	NC	No	No	1	Pcgf2_exon_chr10:85633392	1.0	1.0	0.0	NA	1	NA	NA	NA	NA	Pcgf2_exon_chr10:85633392
1	Cwc25	99.3061	80.8371	-0.3034	0.83	NC	No	No	5	Cwc25_exon_chr10:85686850	0.1663	0.3727	0.2064	NA	5	NA	NA	-0.1203	NA	Cwc25_exon_chr10:85686850
2	Cwc25									Cwc25_exon_chr10:85693059	0.0373	0.0224	-0.0149	NA	1	NA	NA	NA	NA	Cwc25_exon_chr10:85693059
3	Cwc25									Cwc25_exon_chr10:85696391	0.2212	0.1412	-0.08	NA	2	NA	NA	-0.0484	NA	Cwc25_exon_chr10:85696391
4	Cwc25									Cwc25_exon_chr10:85706438	0.5499	0.4593	-0.0906	NA	1	NA	NA	NA	NA	Cwc25_exon_chr10:85706438
5	Cwc25									Cwc25_intron_chr10:85698565	0.0253	0.0045	-0.0209	NA	1	NA	NA	NA	NA	Cwc25_intron_chr10:85698565
1	Rpl23	3249.0944	3917.0859	0.2704	0.3325	NC	No	No	1	Rpl23_exon_chr10:85721524	1.0	1.0	0.0	NA	1	NA	NA	NA	NA	Rpl23_exon_chr10:85721524
1	Cacnb1	79.7869	48.8845	-0.723	0.459	NC	No	No	2	Cacnb1_exon_chr10:85956006	0.0	0.091	0.091	NA	1	NA	NA	NA	NA	Cacnb1_exon_chr10:85956006
2	Cacnb1									Cacnb1_intron_chr10:85957750	1.0	0.909	-0.091	NA	2	NA	NA	-0.0215	NA	Cacnb1_intron_chr10:85957750
1	Stac2	19.9123	11.0308	-0.8504	1.0	NC	No	No	1	Stac2_exon_chr10:85989832	1.0	1.0	0.0	NA	1	NA	NA	NA	NA	Stac2_exon_chr10:85989832
1	Fbxl20	11.846	15.6952	0.4148	1.0	NC	No	No	1	Fbxl20_intron_chr10:86058525	1.0	1.0	0.0	NA	1	NA	NA	NA	NA	Fbxl20_intron_chr10:86058525
1	Med1	119.2941	69.9857	-0.7798	0.289	NC	No	No	2	Med1_exon_chr10:86107841	0.9631	0.9652	0.0021	NA	6	0.8443	0.7511	-0.0933	NA	Med1_exon_chr10:86107841
2	Med1									Med1_intron_chr10:86130424	0.0369	0.0348	-0.0021	NA	1	NA	NA	NA	NA	Med1_intron_chr10:86130424
1	Pgap3	14.588	10.7311	-0.4511	1.0	NC	No	No	1	Pgap3_exon_chr10:86344445	1.0	1.0	0.0	NA	1	NA	NA	NA	NA	Pgap3_exon_chr10:86344445
1	Mien1	73.0084	95.7714	0.3873	0.6687	NC	No	No	1	Mien1_exon_chr10:86392292	1.0	1.0	0.0	NA	1	NA	NA	NA	NA	Mien1_exon_chr10:86392292
1	Med24	41.164	54.3536	0.4009	0.8357	NC	No	No	1	Med24_exon_chr10:86620582	1.0	1.0	0.0	NA	1	NA	NA	NA	NA	Med24_exon_chr10:86620582
1	Nr1d1	59.9693	48.6392	-0.2992	0.8345	NC	No	No	1	Nr1d1_exon_chr10:86684357	1.0	1.0	0.0	NA	3	0.2471	0.3252	0.0781	NA	Nr1d1_exon_chr10:86684357
1	Top2a	269.7524	333.6256	0.3097	0.5972	NC	No	No	11	Top2a_exon_chr10:86901998	0.0	0.0108	0.0108	NA	1	NA	NA	NA	NA	Top2a_exon_chr10:86901998
2	Top2a									Top2a_exon_chr10:86903886	0.0383	0.0366	-0.0016	NA	1	NA	NA	NA	NA	Top2a_exon_chr10:86903886
3	Top2a									Top2a_exon_chr10:86907007	0.3412	0.4537	0.1125	NA	2	0.9959	0.9895	-0.0064	NA	Top2a_exon_chr10:86907007
4	Top2a									Top2a_exon_chr10:86908870	0.0236	0.0116	-0.012	NA	1	NA	NA	NA	NA	Top2a_exon_chr10:86908870
5	Top2a									Top2a_exon_chr10:86909157	0.2665	0.2532	-0.0133	NA	1	NA	NA	NA	NA	Top2a_exon_chr10:86909157
6	Top2a									Top2a_exon_chr10:86911262	0.0206	0.0386	0.018	NA	4	NA	NA	-0.0191	NA	Top2a_exon_chr10:86911262
7	Top2a									Top2a_exon_chr10:86911966	0.0232	0.0093	-0.014	NA	1	NA	NA	NA	NA	Top2a_exon_chr10:86911966
8	Top2a									Top2a_exon_chr10:86918600	0.1951	0.1187	-0.0764	NA	1	NA	NA	NA	NA	Top2a_exon_chr10:86918600
9	Top2a									Top2a_exon_chr10:86923595	0.0164	0.0011	-0.0153	NA	1	NA	NA	NA	NA	Top2a_exon_chr10:86923595
10	Top2a									Top2a_exon_chr10:86927626	0.0345	0.0011	-0.0335	NA	1	NA	NA	NA	NA	Top2a_exon_chr10:86927626
11	Top2a									Top2a_exon_chr10:86930949	0.0348	0.0654	0.0306	NA	2	NA	NA	0.0327	NA	Top2a_exon_chr10:86930949
1	Smarce1	505.9384	304.8326	-0.7356	0.1117	NC	No	No	5	Smarce1_exon_chr10:87117322	0.2311	0.0325	-0.1985	Down	1	NA	NA	NA	NA	Smarce1_exon_chr10:87117322
2	Smarce1									Smarce1_exon_chr10:87118094	0.0116	0.0398	0.0282	NA	3	NA	NA	-0.1509	NA	Smarce1_exon_chr10:87118094
3	Smarce1									Smarce1_exon_chr10:87120688	0.4158	0.5861	0.1703	NA	2	0.9665	0.9924	0.026	NA	Smarce1_exon_chr10:87120688
4	Smarce1									Smarce1_exon_chr10:87121351	0.0376	0.141	0.1034	NA	1	NA	NA	NA	NA	Smarce1_exon_chr10:87121351
5	Smarce1									Smarce1_exon_chr10:87127524	0.299	0.2006	-0.0984	NA	1	NA	NA	NA	NA	Smarce1_exon_chr10:87127524
1	Hap1	0.5026	0.0	-1.4963	1.0	NC	No	No	1	Hap1_exon_chr10:88260208	1.0	1.0	0.0	NA	1	NA	NA	NA	NA	Hap1_exon_chr10:88260208
1	Jup	449.1523	522.8198	0.2195	0.5758	NC	No	No	2	Jup_exon_chr10:88281308	0.978	0.9711	-0.0068	NA	1	NA	NA	NA	NA	Jup_exon_chr10:88281308
2	Jup									Jup_intron_chr10:88282065	0.022	0.0289	0.0068	NA	1	NA	NA	NA	NA	Jup_intron_chr10:88282065
1	P3h4	308.2803	111.5161	-1.4751	0.0099	DOWN	No	No	2	P3h4_exon_chr10:88319335	0.9853	1.0	0.0147	NA	1	NA	NA	NA	NA	P3h4_exon_chr10:88319335
2	P3h4									P3h4_intron_chr10:88324571	0.0147	0.0	-0.0147	NA	1	NA	NA	NA	NA	P3h4_intron_chr10:88324571
1	Acly	169.6458	239.4249	0.4909	0.4253	NC	No	No	3	Acly_exon_chr10:88393242	0.8551	0.9624	0.1073	NA	3	0.902	0.8766	-0.0253	NA	Acly_exon_chr10:88393242
2	Acly									Acly_intron_chr10:88418134	0.0711	0.0276	-0.0435	NA	3	NA	NA	0.0001	NA	Acly_intron_chr10:88418134
3	Acly									Acly_intron_chr10:88428049	0.0739	0.01	-0.0638	NA	1	NA	NA	NA	NA	Acly_intron_chr10:88428049
1	Dnajc7	1295.7553	934.1731	-0.4741	0.2486	NC	No	No	2	Dnajc7_exon_chr10:88498579	0.9701	0.9663	-0.0038	NA	1	NA	NA	NA	NA	Dnajc7_exon_chr10:88498579
2	Dnajc7									Dnajc7_exon_chr10:88500573	0.0232	0.0231	-0.0001	NA	1	NA	NA	NA	NA	Dnajc7_exon_chr10:88500573
1	Dhx58	0.5026	3.3872	2.9058	1.0	NC	No	No	1	Dhx58_exon_chr10:88600248	1.0	1.0	0.0	NA	1	NA	NA	NA	NA	Dhx58_exon_chr10:88600248
1	Kat2a	92.9575	88.5357	-0.0676	0.9491	NC	No	No	1	Kat2a_exon_chr10:88612285	1.0	1.0	0.0	NA	1	NA	NA	NA	NA	Kat2a_exon_chr10:88612285
1	Rab5c	1528.7168	929.2778	-0.7187	0.017	DOWN	No	Yes	1	Rab5c_exon_chr10:88623069	1.0	1.0	0.0	NA	4	0.6934	0.5499	-0.1435	Both	Rab5c_exon_chr10:88623069
1	Stat3	279.1955	218.4337	-0.3567	0.4261	NC	No	Yes	2	Stat3_exon_chr10:88792372	0.815	0.8908	0.0758	NA	8	0.9541	0.5386	-0.4156	Shortening	Stat3_exon_chr10:88792372
2	Stat3									Stat3_intron_chr10:88842050	0.185	0.1092	-0.0758	NA	5	NA	NA	-0.2562	NA	Stat3_intron_chr10:88842050
1	Cavin1	11.1211	7.7556	-0.5717	1.0	NC	No	No	1	Cavin1_intron_chr10:88873912	1.0	1.0	0.0	NA	3	NA	NA	-0.3806	NA	Cavin1_intron_chr10:88873912
1	Psmc3ip	45.8542	51.7993	0.1744	0.9569	NC	No	No	1	Psmc3ip_exon_chr10:89002408	1.0	1.0	0.0	NA	2	0.8255	0.4889	-0.3366	NA	Psmc3ip_exon_chr10:89002408
1	Retreg3	92.334	33.5928	-1.4568	0.0739	DOWN	No	No	1	Retreg3_exon_chr10:89008699	1.0	1.0	0.0	NA	3	0.1013	0.0891	-0.0121	NA	Retreg3_exon_chr10:89008699
1	Plekhh3	84.6447	63.8739	-0.4123	0.7172	NC	No	No	1	Plekhh3_exon_chr10:89076843	1.0	1.0	0.0	NA	1	NA	NA	NA	NA	Plekhh3_exon_chr10:89076843
1	Ccr10	6.0318	0.3795	-4.2684	1.0	NC	No	No	1	Ccr10_exon_chr10:89088250	1.0	1.0	0.0	NA	1	NA	NA	NA	NA	Ccr10_exon_chr10:89088250
1	Ezh1	33.7407	20.833	-0.7141	1.0	NC	No	No	2	Ezh1_exon_chr10:89106015	0.8644	0.9484	0.0841	NA	1	NA	NA	NA	NA	Ezh1_exon_chr10:89106015
2	Ezh1									Ezh1_intron_chr10:89112164	0.1356	0.0516	-0.0841	NA	1	NA	NA	NA	NA	Ezh1_intron_chr10:89112164
1	Coa3	303.4182	128.6116	-1.2416	0.0144	DOWN	No	No	1	Coa3_exon_chr10:89199232	1.0	1.0	0.0	NA	2	0.9933	0.8887	-0.1046	NA	Coa3_exon_chr10:89199232
1	Becn1	439.7982	371.2913	-0.2421	0.4675	NC	No	Yes	3	Becn1_exon_chr10:89210649	0.914	0.9536	0.0396	NA	3	0.925	0.6967	-0.2283	Shortening	Becn1_exon_chr10:89210649
2	Becn1									Becn1_intron_chr10:89221757	0.0113	0.001	-0.0103	NA	1	NA	NA	NA	NA	Becn1_intron_chr10:89221757
3	Becn1									Becn1_intron_chr10:89224702	0.0747	0.0454	-0.0293	NA	1	NA	NA	NA	NA	Becn1_intron_chr10:89224702
1	Aarsd1	126.5041	172.0979	0.4451	0.587	NC	No	No	1	Aarsd1_exon_chr10:89320166	1.0	1.0	0.0	NA	1	NA	NA	NA	NA	Aarsd1_exon_chr10:89320166
1	Vat1	1150.5774	723.8569	-0.6683	0.0125	DOWN	No	No	2	Vat1_exon_chr10:89367774	0.9906	0.9737	-0.0168	NA	1	NA	NA	NA	NA	Vat1_exon_chr10:89367774
2	Vat1									Vat1_exon_chr10:89368748	0.0075	0.0195	0.0121	NA	1	NA	NA	NA	NA	Vat1_exon_chr10:89368748
1	Brca1	7.0523	23.8197	1.8101	0.9698	NC	No	No	2	Brca1_exon_chr10:89428698	1.0	0.9851	-0.0149	NA	2	NA	NA	0.0507	NA	Brca1_exon_chr10:89428698
2	Brca1									Brca1_intron_chr10:89415025	0.0	0.0149	0.0149	NA	1	NA	NA	NA	NA	Brca1_intron_chr10:89415025
1	Etv4	76.9567	53.7408	-0.5118	0.7637	NC	No	No	2	Etv4_exon_chr10:89685882	1.0	0.9435	-0.0565	NA	1	NA	NA	NA	NA	Etv4_exon_chr10:89685882
2	Etv4									Etv4_intron_chr10:89698935	0.0	0.0565	0.0565	NA	1	NA	NA	NA	NA	Etv4_intron_chr10:89698935
1	Dusp3	455.5855	313.3637	-0.5383	0.1292	NC	No	Yes	1	Dusp3_exon_chr10:89908430	1.0	1.0	0.0	NA	4	0.9207	0.7222	-0.1985	Both	Dusp3_exon_chr10:89908430
1	Tmem101	147.514	102.696	-0.5216	0.4095	NC	No	No	1	Tmem101_exon_chr10:90093528	1.0	1.0	0.0	NA	2	1.0	0.9841	-0.0159	NA	Tmem101_exon_chr10:90093528
1	Lsm12	165.1032	144.1608	-0.1993	0.6916	NC	No	No	3	Lsm12_exon_chr10:90107248	0.9611	0.9356	-0.0255	NA	5	0.8387	0.7432	-0.0954	NA	Lsm12_exon_chr10:90107248
2	Lsm12									Lsm12_exon_chr10:90108540	0.0358	0.027	-0.0088	NA	3	NA	NA	-0.1247	NA	Lsm12_exon_chr10:90108540
3	Lsm12									Lsm12_exon_chr10:90125174	0.0031	0.0374	0.0343	NA	1	NA	NA	NA	NA	Lsm12_exon_chr10:90125174
1	Hdac5	31.9351	49.0392	0.6256	0.5405	NC	No	No	1	Hdac5_exon_chr10:90140309	1.0	1.0	0.0	NA	1	NA	NA	NA	NA	Hdac5_exon_chr10:90140309
1	Ubtf	458.5588	327.4628	-0.4852	0.1424	NC	No	No	6	Ubtf_exon_chr10:90252631	0.685	0.7725	0.0875	NA	2	0.1059	0.0259	-0.0801	NA	Ubtf_exon_chr10:90252631
2	Ubtf									Ubtf_exon_chr10:90254862	0.0194	0.0044	-0.015	NA	1	NA	NA	NA	NA	Ubtf_exon_chr10:90254862
3	Ubtf									Ubtf_exon_chr10:90256390	0.2043	0.202	-0.0023	NA	1	NA	NA	NA	NA	Ubtf_exon_chr10:90256390
4	Ubtf									Ubtf_exon_chr10:90260205	0.0527	0.0	-0.0527	NA	1	NA	NA	NA	NA	Ubtf_exon_chr10:90260205
5	Ubtf									Ubtf_exon_chr10:90260383	0.0387	0.0018	-0.0369	NA	1	NA	NA	NA	NA	Ubtf_exon_chr10:90260383
6	Ubtf									Ubtf_intron_chr10:90260049	0.0	0.0193	0.0193	NA	1	NA	NA	NA	NA	Ubtf_intron_chr10:90260049
1	Slc25a39	210.1476	297.3399	0.5017	0.2867	NC	No	No	1	Slc25a39_exon_chr10:90352272	1.0	1.0	0.0	NA	1	NA	NA	NA	NA	Slc25a39_exon_chr10:90352272
1	Ccdc43	258.7395	155.8206	-0.7348	0.1188	NC	Yes	No	3	Ccdc43_exon_chr10:90646770	0.4143	0.2417	-0.1725	Down	2	0.8313	0.7914	-0.0398	NA	Ccdc43_exon_chr10:90646770
2	Ccdc43									Ccdc43_exon_chr10:90651900	0.5565	0.6882	0.1317	NA	1	NA	NA	NA	NA	Ccdc43_exon_chr10:90651900
3	Ccdc43									Ccdc43_intron_chr10:90648854	0.0292	0.07	0.0408	NA	1	NA	NA	NA	NA	Ccdc43_intron_chr10:90648854
1	Gjc1	320.8955	330.0351	0.0384	0.8998	NC	No	No	1	Gjc1_intron_chr10:90909265	1.0	1.0	0.0	NA	3	0.0143	0.0018	-0.0125	NA	Gjc1_intron_chr10:90909265
1	Kif18b	36.8496	94.5819	1.3674	0.2114	NC	No	No	1	Kif18b_exon_chr10:91009004	1.0	1.0	0.0	NA	1	NA	NA	NA	NA	Kif18b_exon_chr10:91009004
1	Dcakd	1340.4023	792.4103	-0.7578	0.0006	DOWN	No	No	1	Dcakd_exon_chr10:91096738	1.0	1.0	0.0	NA	1	NA	NA	NA	NA	Dcakd_exon_chr10:91096738
1	Plcd3	280.1633	128.3513	-1.132	0.0565	DOWN	No	No	2	Plcd3_exon_chr10:91165382	0.9639	0.9743	0.0104	NA	2	0.1907	0.264	0.0733	NA	Plcd3_exon_chr10:91165382
2	Plcd3									Plcd3_intron_chr10:91185819	0.0361	0.0257	-0.0104	NA	1	NA	NA	NA	NA	Plcd3_intron_chr10:91185819
1	Map3k14	418.9549	461.6071	0.1375	0.8317	NC	No	No	2	Map3k14_exon_chr10:91304884	0.2552	0.2784	0.0232	NA	1	NA	NA	NA	NA	Map3k14_exon_chr10:91304884
2	Map3k14									Map3k14_intron_chr10:91353535	0.7355	0.7189	-0.0166	NA	2	0.0027	0.0865	0.0838	NA	Map3k14_intron_chr10:91353535
1	Plekhm1	42.0875	15.1062	-1.5058	0.2414	NC	No	No	1	Plekhm1_exon_chr10:91454558	1.0	1.0	0.0	NA	1	NA	NA	NA	NA	Plekhm1_exon_chr10:91454558
1	Gosr2	105.4072	201.1685	0.9338	0.1078	NC	No	Yes	1	Gosr2_exon_chr10:91738363	1.0	1.0	0.0	NA	4	0.7011	0.5448	-0.1563	Shortening	Gosr2_exon_chr10:91738363
1	Nsf	25.6073	13.9645	-0.885	1.0	NC	No	No	5	Nsf_exon_chr10:91880141	0.0587	0.815	0.7563	NA	1	NA	NA	NA	NA	Nsf_exon_chr10:91880141
2	Nsf									Nsf_intron_chr10:91902764	0.2838	0.185	-0.0988	NA	2	NA	NA	-0.0229	NA	Nsf_intron_chr10:91902764
3	Nsf									Nsf_intron_chr10:91965973	0.2475	0.0	-0.2475	NA	1	NA	NA	NA	NA	Nsf_intron_chr10:91965973
4	Nsf									Nsf_intron_chr10:91972838	0.1371	0.0	-0.1371	NA	1	NA	NA	NA	NA	Nsf_intron_chr10:91972838
5	Nsf									Nsf_intron_chr10:92008036	0.2729	0.0	-0.2729	NA	1	NA	NA	NA	NA	Nsf_intron_chr10:92008036
1	Cdc27	36.3317	48.7629	0.4129	0.8319	NC	No	No	4	Cdc27_exon_chr10:92554633	0.3646	0.8631	0.4985	NA	3	0.0049	0.0833	0.0784	NA	Cdc27_exon_chr10:92554633
2	Cdc27									Cdc27_exon_chr10:92569620	0.5217	0.0708	-0.4509	NA	1	NA	NA	NA	NA	Cdc27_exon_chr10:92569620
3	Cdc27									Cdc27_intron_chr10:92559023	0.0	0.0147	0.0147	NA	1	NA	NA	NA	NA	Cdc27_intron_chr10:92559023
4	Cdc27									Cdc27_intron_chr10:92581278	0.1137	0.0514	-0.0623	NA	1	NA	NA	NA	NA	Cdc27_intron_chr10:92581278
1	Limd2	200.3017	204.6077	0.0351	1.0	NC	No	No	1	Limd2_exon_chr10:94351601	1.0	1.0	0.0	NA	2	1.0	0.9802	-0.0198	NA	Limd2_exon_chr10:94351601
1	Strada	71.179	50.9778	-0.4795	0.7157	NC	No	No	2	Strada_exon_chr10:94356243	0.9475	0.9726	0.0251	NA	1	NA	NA	NA	NA	Strada_exon_chr10:94356243
2	Strada									Strada_intron_chr10:94362933	0.0525	0.0206	-0.032	NA	1	NA	NA	NA	NA	Strada_intron_chr10:94362933
1	Ccdc47	526.2248	392.8894	-0.4276	0.2213	NC	No	No	5	Ccdc47_exon_chr10:94390135	0.8534	0.8456	-0.0078	NA	6	0.2934	0.4099	0.1165	NA	Ccdc47_exon_chr10:94390135
2	Ccdc47									Ccdc47_exon_chr10:94392321	0.1112	0.1282	0.017	NA	3	NA	NA	0.0227	NA	Ccdc47_exon_chr10:94392321
3	Ccdc47									Ccdc47_exon_chr10:94402339	0.0186	0.0009	-0.0177	NA	2	NA	NA	-0.2051	NA	Ccdc47_exon_chr10:94402339
4	Ccdc47									Ccdc47_intron_chr10:94392763	0.0124	0.0044	-0.008	NA	1	NA	NA	NA	NA	Ccdc47_intron_chr10:94392763
5	Ccdc47									Ccdc47_intron_chr10:94398676	0.0044	0.0125	0.0081	NA	3	NA	NA	0.5649	NA	Ccdc47_intron_chr10:94398676
1	Ftsj3	114.4359	124.5477	0.1122	1.0	NC	No	No	5	Ftsj3_exon_chr10:94439566	0.3689	0.5298	0.1609	NA	3	0.6762	0.9679	0.2918	NA	Ftsj3_exon_chr10:94439566
2	Ftsj3									Ftsj3_exon_chr10:94439744	0.1036	0.0242	-0.0794	NA	1	NA	NA	NA	NA	Ftsj3_exon_chr10:94439744
3	Ftsj3									Ftsj3_exon_chr10:94440006	0.0408	0.0115	-0.0293	NA	2	NA	NA	-0.1286	NA	Ftsj3_exon_chr10:94440006
4	Ftsj3									Ftsj3_exon_chr10:94440904	0.1094	0.0435	-0.0659	NA	1	NA	NA	NA	NA	Ftsj3_exon_chr10:94440904
5	Ftsj3									Ftsj3_intron_chr10:94442353	0.3773	0.3909	0.0136	NA	1	NA	NA	NA	NA	Ftsj3_intron_chr10:94442353
1	Smarcd2	369.2482	203.4839	-0.8611	0.023	DOWN	No	No	1	Smarcd2_exon_chr10:94452813	1.0	1.0	0.0	NA	1	NA	NA	NA	NA	Smarcd2_exon_chr10:94452813
1	Ern1	11.6494	2.2767	-2.3905	1.0	NC	No	No	1	Ern1_intron_chr10:94627931	1.0	1.0	0.0	NA	1	NA	NA	NA	NA	Ern1_intron_chr10:94627931
1	Ddx5	1391.7155	1212.6285	-0.1998	0.4254	NC	No	No	3	Ddx5_exon_chr10:94981636	0.6254	0.918	0.2926	Up	1	NA	NA	NA	NA	Ddx5_exon_chr10:94981636
2	Ddx5									Ddx5_exon_chr10:94984238	0.2118	0.0407	-0.1711	Down	1	NA	NA	NA	NA	Ddx5_exon_chr10:94984238
3	Ddx5									Ddx5_exon_chr10:94986501	0.1587	0.0365	-0.1222	Down	2	0.1325	0.0625	-0.07	NA	Ddx5_exon_chr10:94986501
1	Smurf2	105.0101	263.1422	1.3323	0.0045	UP	No	Yes	3	Smurf2_exon_chr10:95020771	0.7979	0.9658	0.1679	Up	3	0.8058	0.0937	-0.7121	Shortening	Smurf2_exon_chr10:95020771
2	Smurf2									Smurf2_intron_chr10:95058429	0.0334	0.0	-0.0334	NA	1	NA	NA	NA	NA	Smurf2_intron_chr10:95058429
3	Smurf2									Smurf2_intron_chr10:95117954	0.1688	0.0329	-0.1359	NA	5	NA	NA	-0.1007	NA	Smurf2_intron_chr10:95117954
1	Kpna2	37.2119	34.1586	-0.1163	1.0	NC	No	No	2	Kpna2_exon_chr10:95200376	0.9737	0.9691	-0.0046	NA	3	0.9193	0.6497	-0.2696	NA	Kpna2_exon_chr10:95200376
2	Kpna2									Kpna2_exon_chr10:95209663	0.0263	0.0309	0.0046	NA	1	NA	NA	NA	NA	Kpna2_exon_chr10:95209663
1	Prkca	52.4403	177.5443	1.737	0.0024	UP	No	No	6	Prkca_exon_chr10:96192820	0.2567	0.4238	0.167	Up	7	NA	NA	-0.141	NA	Prkca_exon_chr10:96192820
2	Prkca									Prkca_intron_chr10:96213849	0.0388	0.0	-0.0388	NA	1	NA	NA	NA	NA	Prkca_intron_chr10:96213849
3	Prkca									Prkca_intron_chr10:96264759	0.0241	0.0479	0.0238	NA	2	NA	NA	0.0789	NA	Prkca_intron_chr10:96264759
4	Prkca									Prkca_intron_chr10:96302920	0.2519	0.1044	-0.1475	NA	4	NA	NA	0.0639	NA	Prkca_intron_chr10:96302920
5	Prkca									Prkca_intron_chr10:96433396	0.1154	0.1062	-0.0092	NA	5	NA	NA	-0.1406	NA	Prkca_intron_chr10:96433396
6	Prkca									Prkca_intron_chr10:96581709	0.3131	0.3177	0.0047	NA	10	NA	NA	0.0807	NA	Prkca_intron_chr10:96581709
1	Wipi1	452.8288	349.017	-0.3716	0.223	NC	No	No	6	Wipi1_exon_chr10:97860276	0.7368	0.587	-0.1498	NA	3	0.8653	0.8455	-0.0198	NA	Wipi1_exon_chr10:97860276
2	Wipi1									Wipi1_exon_chr10:97863731	0.0551	0.0382	-0.0169	NA	1	NA	NA	NA	NA	Wipi1_exon_chr10:97863731
3	Wipi1									Wipi1_intron_chr10:97863147	0.1581	0.2124	0.0543	NA	5	0.8609	0.4462	-0.4146	NA	Wipi1_intron_chr10:97863147
4	Wipi1									Wipi1_intron_chr10:97865416	0.0292	0.0129	-0.0163	NA	1	NA	NA	NA	NA	Wipi1_intron_chr10:97865416
5	Wipi1									Wipi1_intron_chr10:97869450	0.0055	0.0935	0.0881	NA	1	NA	NA	NA	NA	Wipi1_intron_chr10:97869450
6	Wipi1									Wipi1_intron_chr10:97881296	0.0053	0.0498	0.0445	NA	2	NA	NA	0.313	NA	Wipi1_intron_chr10:97881296
1	Abca5	6.9789	25.464	1.8604	1.0	NC	No	No	1	Abca5_exon_chr10:98576352	1.0	1.0	0.0	NA	2	NA	NA	0.1527	NA	Abca5_exon_chr10:98576352
1	Slc39a11	22.2398	24.6484	0.1385	1.0	NC	No	No	4	Slc39a11_exon_chr10:101756439	0.2491	0.3656	0.1165	NA	1	NA	NA	NA	NA	Slc39a11_exon_chr10:101756439
2	Slc39a11									Slc39a11_intron_chr10:101815617	0.4036	0.4031	-0.0005	NA	4	NA	NA	0.1919	NA	Slc39a11_intron_chr10:101815617
3	Slc39a11									Slc39a11_intron_chr10:101891537	0.3036	0.2313	-0.0724	NA	5	NA	NA	-0.2816	NA	Slc39a11_intron_chr10:101891537
4	Slc39a11									Slc39a11_intron_chr10:102045161	0.0437	0.0	-0.0437	NA	1	NA	NA	NA	NA	Slc39a11_intron_chr10:102045161
1	Fam104a	356.0815	326.8151	-0.1238	0.7576	NC	No	Yes	2	Fam104a_exon_chr10:102181708	0.9912	0.9898	-0.0014	NA	5	0.2509	0.0888	-0.1621	Shortening	Fam104a_exon_chr10:102181708
2	Fam104a									Fam104a_intron_chr10:102193498	0.0014	0.0102	0.0088	NA	1	NA	NA	NA	NA	Fam104a_intron_chr10:102193498
1	Cdc42ep4	95.1278	136.2978	0.518	0.5988	NC	No	No	1	Cdc42ep4_exon_chr10:102247415	1.0	1.0	0.0	NA	1	NA	NA	NA	NA	Cdc42ep4_exon_chr10:102247415
1	Sdk2	2.0106	5.3361	1.4763	1.0	NC	No	No	3	Sdk2_exon_chr10:102304067	0.0	0.0653	0.0653	NA	1	NA	NA	NA	NA	Sdk2_exon_chr10:102304067
2	Sdk2									Sdk2_intron_chr10:102370148	0.0	0.9347	0.9347	NA	1	NA	NA	NA	NA	Sdk2_intron_chr10:102370148
3	Sdk2									Sdk2_intron_chr10:102387425	1.0	0.0	-1.0	NA	1	NA	NA	NA	NA	Sdk2_intron_chr10:102387425
1	Nat9	57.7972	80.0172	0.4637	0.6308	NC	No	No	2	Nat9_exon_chr10:103732596	0.9587	0.9817	0.0231	NA	1	NA	NA	NA	NA	Nat9_exon_chr10:103732596
2	Nat9									Nat9_exon_chr10:103733155	0.0413	0.0183	-0.0231	NA	1	NA	NA	NA	NA	Nat9_exon_chr10:103733155
1	Fdxr	31.773	17.8665	-0.8369	1.0	NC	No	No	1	Fdxr_exon_chr10:103818133	1.0	1.0	0.0	NA	1	NA	NA	NA	NA	Fdxr_exon_chr10:103818133
1	Hid1	27.4434	16.433	-0.7377	1.0	NC	No	No	2	Hid1_exon_chr10:103899962	0.9788	0.8773	-0.1014	NA	1	NA	NA	NA	NA	Hid1_exon_chr10:103899962
2	Hid1									Hid1_intron_chr10:103906018	0.0212	0.1227	0.1014	NA	1	NA	NA	NA	NA	Hid1_intron_chr10:103906018
1	Atp5pd	2588.3379	1773.2458	-0.5475	0.0205	NC	No	No	1	Atp5pd_exon_chr10:103967544	1.0	1.0	0.0	NA	1	NA	NA	NA	NA	Atp5pd_exon_chr10:103967544
1	Nt5c	28.3605	3.4151	-3.1203	0.9077	NC	No	No	2	Nt5c_exon_chr10:104053140	0.6755	0.6667	-0.0088	NA	1	NA	NA	NA	NA	Nt5c_exon_chr10:104053140
2	Nt5c									Nt5c_intron_chr10:104053249	0.3245	0.3333	0.0088	NA	1	NA	NA	NA	NA	Nt5c_intron_chr10:104053249
1	Jpt1	191.6099	356.9606	0.9056	0.07	UP	No	Yes	1	Jpt1_exon_chr10:104058679	1.0	1.0	0.0	NA	2	0.656	0.3832	-0.2728	Shortening	Jpt1_exon_chr10:104058679
1	Sumo2	1227.3248	1202.5175	-0.0277	0.9294	NC	No	No	1	Sumo2_exon_chr10:104086064	1.0	1.0	0.0	NA	1	NA	NA	NA	NA	Sumo2_exon_chr10:104086064
1	Gga3	26.5766	12.1884	-1.1062	1.0	NC	No	No	1	Gga3_exon_chr10:104139297	1.0	1.0	0.0	NA	2	NA	NA	-0.1081	NA	Gga3_exon_chr10:104139297
1	Mif4gd	23.981	24.5693	0.0108	1.0	NC	No	No	1	Mif4gd_exon_chr10:104159887	1.0	1.0	0.0	NA	1	NA	NA	NA	NA	Mif4gd_exon_chr10:104159887
1	Slc25a19	13.3581	36.6164	1.4601	1.0	NC	No	No	1	Slc25a19_exon_chr10:104167224	1.0	1.0	0.0	NA	1	NA	NA	NA	NA	Slc25a19_exon_chr10:104167224
1	Grb2	410.0936	503.0383	0.2954	0.4467	NC	No	Yes	2	Grb2_exon_chr10:104195878	0.9703	0.9979	0.0276	NA	5	0.4301	0.1651	-0.265	Both	Grb2_exon_chr10:104195878
2	Grb2									Grb2_intron_chr10:104253145	0.0297	0.0021	-0.0276	NA	2	NA	NA	-0.4	NA	Grb2_intron_chr10:104253145
1	Caskin2	17.6839	31.3118	0.8347	0.5393	NC	No	No	1	Caskin2_exon_chr10:104344932	1.0	1.0	0.0	NA	1	NA	NA	NA	NA	Caskin2_exon_chr10:104344932
1	Recql5	34.1049	35.5279	0.0571	1.0	NC	No	No	1	Recql5_exon_chr10:104444271	1.0	1.0	0.0	NA	1	NA	NA	NA	NA	Recql5_exon_chr10:104444271
1	Galk1	41.4251	212.2282	2.3418	0.0	UP	No	No	1	Galk1_exon_chr10:104560511	1.0	1.0	0.0	NA	3	0.0798	0.1042	0.0244	NA	Galk1_exon_chr10:104560511
1	H3f3b	1387.7566	2810.8258	1.0177	0.0	UP	No	Yes	1	H3f3b_exon_chr10:104574899	1.0	1.0	0.0	NA	6	0.5476	0.1026	-0.445	Shortening	H3f3b_exon_chr10:104574899
1	Mrpl38	17.8562	24.1594	0.4228	1.0	NC	No	No	2	Mrpl38_exon_chr10:104682658	0.9555	0.8015	-0.1541	NA	1	NA	NA	NA	NA	Mrpl38_exon_chr10:104682658
2	Mrpl38									Mrpl38_intron_chr10:104688828	0.0445	0.1985	0.1541	NA	1	NA	NA	NA	NA	Mrpl38_intron_chr10:104688828
1	Srp68	339.8857	235.3631	-0.5324	0.2442	NC	No	No	2	Srp68_exon_chr10:105124084	0.5694	0.8814	0.312	NA	2	0.9493	0.9764	0.0272	NA	Srp68_exon_chr10:105124084
2	Srp68									Srp68_exon_chr10:105150080	0.4272	0.1171	-0.3101	Down	1	NA	NA	NA	NA	Srp68_exon_chr10:105150080
1	Exoc7	341.1279	377.2918	0.139	0.7166	NC	No	Yes	3	Exoc7_exon_chr10:105163856	0.1327	0.2236	0.091	NA	1	NA	NA	NA	NA	Exoc7_exon_chr10:105163856
2	Exoc7									Exoc7_exon_chr10:105242323	0.1327	0.2381	0.1055	NA	1	NA	NA	NA	NA	Exoc7_exon_chr10:105242323
3	Exoc7									Exoc7_intron_chr10:105241901	0.7347	0.5382	-0.1965	NA	7	0.6275	0.1746	-0.453	Shortening	Exoc7_intron_chr10:105241901
1	Prpsap1	106.7581	108.3299	0.0223	1.0	NC	No	No	4	Prpsap1_exon_chr10:105431053	0.9863	0.9362	-0.0501	NA	1	NA	NA	NA	NA	Prpsap1_exon_chr10:105431053
2	Prpsap1									Prpsap1_intron_chr10:105436095	0.0	0.0131	0.0131	NA	1	NA	NA	NA	NA	Prpsap1_intron_chr10:105436095
3	Prpsap1									Prpsap1_intron_chr10:105446576	0.0	0.048	0.048	NA	1	NA	NA	NA	NA	Prpsap1_intron_chr10:105446576
4	Prpsap1									Prpsap1_intron_chr10:105451896	0.0137	0.0026	-0.0111	NA	1	NA	NA	NA	NA	Prpsap1_intron_chr10:105451896
1	Rhbdf2	20.9928	13.1839	-0.6576	1.0	NC	No	No	1	Rhbdf2_exon_chr10:105574948	1.0	1.0	0.0	NA	1	NA	NA	NA	NA	Rhbdf2_exon_chr10:105574948
1	Jmjd6	71.5845	91.763	0.3623	0.7402	NC	No	No	2	Jmjd6_exon_chr10:105782084	1.0	0.9775	-0.0225	NA	1	NA	NA	NA	NA	Jmjd6_exon_chr10:105782084
2	Jmjd6									Jmjd6_intron_chr10:105783221	0.0	0.0225	0.0225	NA	1	NA	NA	NA	NA	Jmjd6_intron_chr10:105783221
1	Srsf2	391.1834	595.0842	0.6108	0.1153	NC	No	Yes	1	Srsf2_exon_chr10:105793843	1.0	1.0	0.0	NA	6	0.8515	0.4625	-0.389	Both	Srsf2_exon_chr10:105793843
1	Tk1	21.6403	99.8553	2.2075	0.0636	UP	No	No	1	Tk1_exon_chr10:106819243	1.0	1.0	0.0	NA	2	0.0226	0.0566	0.034	NA	Tk1_exon_chr10:106819243
1	Cyth1	17.8949	6.8302	-1.4021	1.0	NC	No	No	2	Cyth1_intron_chr10:107224592	0.2278	0.0	-0.2278	NA	1	NA	NA	NA	NA	Cyth1_intron_chr10:107224592
2	Cyth1									Cyth1_intron_chr10:107281138	0.7722	1.0	0.2278	NA	1	NA	NA	NA	NA	Cyth1_intron_chr10:107281138
1	Usp36	138.0448	170.4165	0.3	0.8167	NC	No	Yes	4	Usp36_exon_chr10:107293618	0.3088	0.179	-0.1298	NA	1	NA	NA	NA	NA	Usp36_exon_chr10:107293618
2	Usp36									Usp36_exon_chr10:107298824	0.362	0.317	-0.045	NA	2	NA	NA	0.0587	NA	Usp36_exon_chr10:107298824
3	Usp36									Usp36_intron_chr10:107295958	0.32	0.4708	0.1508	NA	3	0.0115	0.3016	0.29	Lengthening	Usp36_intron_chr10:107295958
4	Usp36									Usp36_intron_chr10:107319187	0.0092	0.0331	0.024	NA	1	NA	NA	NA	NA	Usp36_intron_chr10:107319187
1	Timp2	1187.1035	2233.0133	0.9101	0.0	UP	No	No	3	Timp2_exon_chr10:107339533	0.8677	0.9494	0.0817	NA	1	NA	NA	NA	NA	Timp2_exon_chr10:107339533
2	Timp2									Timp2_exon_chr10:107349041	0.0094	0.0109	0.0016	NA	1	NA	NA	NA	NA	Timp2_exon_chr10:107349041
3	Timp2									Timp2_intron_chr10:107348932	0.1146	0.0373	-0.0772	NA	4	0.8944	0.8943	-0.0001	NA	Timp2_intron_chr10:107348932
1	Lgals3bp	90.6422	153.2434	0.7516	0.1377	NC	No	No	1	Lgals3bp_exon_chr10:107416700	1.0	1.0	0.0	NA	1	NA	NA	NA	NA	Lgals3bp_exon_chr10:107416700
1	Cant1	61.6781	45.8462	-0.4318	0.6817	NC	No	No	1	Cant1_exon_chr10:107434259	1.0	1.0	0.0	NA	3	0.9701	0.7275	-0.2425	NA	Cant1_exon_chr10:107434259
1	Cbx8	4.3772	19.3462	2.1627	1.0	NC	No	No	1	Cbx8_exon_chr10:108149170	1.0	1.0	0.0	NA	2	NA	NA	0.1219	NA	Cbx8_exon_chr10:108149170
1	Eif4a3	172.7794	227.5012	0.3986	0.4503	NC	No	No	1	Eif4a3_exon_chr10:108415411	1.0	1.0	0.0	NA	1	NA	NA	NA	NA	Eif4a3_exon_chr10:108415411
1	Cep131	43.194	76.9362	0.8219	0.3709	NC	No	No	2	Cep131_exon_chr10:109243526	0.6524	0.72	0.0676	NA	1	NA	NA	NA	NA	Cep131_exon_chr10:109243526
2	Cep131									Cep131_exon_chr10:109247464	0.3476	0.28	-0.0676	NA	1	NA	NA	NA	NA	Cep131_exon_chr10:109247464
1	Tepsin	34.8842	22.963	-0.6045	0.5468	NC	No	No	1	Tepsin_exon_chr10:109272644	1.0	1.0	0.0	NA	1	NA	NA	NA	NA	Tepsin_exon_chr10:109272644
1	Slc38a10	650.1182	655.3899	0.0122	0.9232	NC	No	No	1	Slc38a10_exon_chr10:109286246	1.0	1.0	0.0	NA	4	0.2143	0.1437	-0.0706	NA	Slc38a10_exon_chr10:109286246
1	Actg1	7696.5136	8017.4148	0.0588	0.906	NC	No	No	1	Actg1_exon_chr10:109519277	1.0	1.0	0.0	NA	3	0.9933	0.96	-0.0334	NA	Actg1_exon_chr10:109519277
1	Nploc4	55.508	97.2865	0.8204	0.3259	NC	No	No	4	Nploc4_exon_chr10:109555398	0.8468	0.8321	-0.0147	NA	4	0.989	0.4479	-0.5411	NA	Nploc4_exon_chr10:109555398
2	Nploc4									Nploc4_intron_chr10:109556074	0.0	0.0211	0.0211	NA	1	NA	NA	NA	NA	Nploc4_intron_chr10:109556074
3	Nploc4									Nploc4_intron_chr10:109557194	0.0182	0.0672	0.0491	NA	1	NA	NA	NA	NA	Nploc4_intron_chr10:109557194
[truncated: 9,817 more rows]
