# Supplementary material for: Zika Virus Infection Alters Gene Expression and Poly-Adenylation Patterns in Placental Cells
Source: Pathogens. 2022 Aug 18;11(8):936. doi: 10.3390/pathogens11080936 (PMC9414685; doi:10.3390/pathogens11080936)
Supplement: Supplementary file 1 [file pathogens-11-00936-s001.zip › Data S2.tsv]

	Gene Name	Mean Counts Cond1	Mean Counts Cond2	Fold Change	pAdj	DE Result	Any Splicing APA? (DPAC)	Any Tandem APA? (DPAC)	#Exons with a PAC	Exon Names	Exon fraction Cond1	Exon fraction Cond2	Exon Fraction Change	Exon Results (NA = Not significant)	#PACs per Exon	PDU per Exon Cond1	PDU per Exon Cond2	delta-PDUI per Exon	DPAC Result
1	RAB3IP	83.6855	41.6262	-1.0067	1.0	NC	No	No	1	RAB3IP_exon_chr12:70209143	1.0	1.0	0.0	NA	5	NA	NA	NA	NA	RAB3IP_exon_chr12:70209143
1	DTWD2	0.0	2.315	3.6795	1.0	NC	No	No	1	DTWD2_exon_chr5:118176782	1.0	1.0	0.0	NA	1	NA	NA	NA	NA	DTWD2_exon_chr5:118176782
1	MPDU1	484.2662	621.4823	0.3633	0.5095	NC	No	No	1	MPDU1_exon_chr17:7490743	1.0	1.0	0.0	NA	1	NA	NA	NA	NA	MPDU1_exon_chr17:7490743
1	CCDC173	0.0	6.9447	5.2558	1.0	NC	No	No	1	CCDC173_exon_chr2:170507031	1.0	1.0	0.0	NA	1	NA	NA	NA	NA	CCDC173_exon_chr2:170507031
1	NDUFAF7	107.4687	110.7961	0.0485	1.0	NC	No	No	2	NDUFAF7_exon_chr2:37475277	0.8719	1.0	0.1281	NA	1	NA	NA	NA	NA	NDUFAF7_exon_chr2:37475277
2	NDUFAF7									NDUFAF7_exon_chr2:37480228	0.1281	0.0	-0.1281	NA	2	0.1968	0.2061	0.0093	NA	NDUFAF7_exon_chr2:37480228
1	STAMBP	139.7217	199.7157	0.5085	0.7979	NC	No	No	2	STAMBP_exon_chr2:74072293	0.051	0.274	0.2229	NA	1	NA	NA	NA	NA	STAMBP_exon_chr2:74072293
2	STAMBP									STAMBP_exon_chr2:74089329	0.949	0.7183	-0.2307	NA	1	NA	NA	NA	NA	STAMBP_exon_chr2:74089329
1	IGFBP3	10.6266	0.0	-5.948	1.0	NC	No	No	1	IGFBP3_exon_chr7:45953433	1.0	1.0	0.0	NA	1	NA	NA	NA	NA	IGFBP3_exon_chr7:45953433
1	NDUFA1	2132.9073	2104.0254	-0.0198	0.9388	NC	No	No	1	NDUFA1_exon_chrX:119010476	1.0	1.0	0.0	NA	1	NA	NA	NA	NA	NDUFA1_exon_chrX:119010476
1	IQCH-AS1	9.1698	18.3015	1.0377	1.0	NC	No	No	2	IQCH-AS1_exon_chr15:67700813	0.0	0.1418	0.1418	NA	1	NA	NA	NA	NA	IQCH-AS1_exon_chr15:67700813
2	IQCH-AS1									IQCH-AS1_exon_chr15:67807598	1.0	0.8582	-0.1418	NA	1	NA	NA	NA	NA	IQCH-AS1_exon_chr15:67807598
1	ZNF737	9.6425	23.2376	1.3099	0.9037	NC	No	No	1	ZNF737_exon_chr19:20728782	1.0	1.0	0.0	NA	3	NA	NA	NA	NA	ZNF737_exon_chr19:20728782
1	LINC00221	84.9893	173.9651	1.0335	0.2547	NC	No	No	1	LINC00221_exon_chr14:106950170	1.0	1.0	0.0	NA	2	0.4852	0.4089	-0.0762	NA	LINC00221_exon_chr14:106950170
1	PRIM2	83.73	51.3939	-0.7058	1.0	NC	No	No	1	PRIM2_exon_chr6:57512796	1.0	1.0	0.0	NA	2	0.7014	0.5927	-0.1087	NA	PRIM2_exon_chr6:57512796
1	PGS1	24.0716	32.7301	0.4714	1.0	NC	No	No	1	PGS1_exon_chr17:76420141	1.0	1.0	0.0	NA	2	NA	NA	NA	NA	PGS1_exon_chr17:76420141
1	LOC100288203	11.7646	3.5926	-1.7368	1.0	NC	No	No	1	LOC100288203_exon_chr15:30781470	1.0	1.0	0.0	NA	2	NA	NA	NA	NA	LOC100288203_exon_chr15:30781470
1	COPG2	12.641	26.1137	1.0224	1.0	NC	No	No	1	COPG2_exon_chr7:130146647	1.0	1.0	0.0	NA	1	NA	NA	NA	NA	COPG2_exon_chr7:130146647
1	HYAL3	10.1607	12.3465	0.3075	1.0	NC	No	No	1	HYAL3_exon_chr3:50330946	1.0	1.0	0.0	NA	1	NA	NA	NA	NA	HYAL3_exon_chr3:50330946
1	BRD7	154.7886	218.3329	0.4981	1.0	NC	No	No	2	BRD7_exon_chr16:50353177	0.7919	0.5408	-0.251	NA	1	NA	NA	NA	NA	BRD7_exon_chr16:50353177
2	BRD7									BRD7_exon_chr16:50402209	0.1526	0.424	0.2714	NA	4	0.0995	0.0759	-0.0236	NA	BRD7_exon_chr16:50402209
1	RAD51L3-RFFL	11.0507	30.479	1.4923	1.0	NC	No	No	1	RAD51L3-RFFL_exon_chr17:33339168	1.0	1.0	0.0	NA	2	NA	NA	NA	NA	RAD51L3-RFFL_exon_chr17:33339168
1	YTHDC2	73.1268	35.837	-1.0384	1.0	NC	No	No	1	YTHDC2_exon_chr5:112929178	1.0	1.0	0.0	NA	5	0.8649	0.5337	-0.3312	NA	YTHDC2_exon_chr5:112929178
1	TAPT1	13.5666	9.2817	-0.5242	1.0	NC	No	No	1	TAPT1_exon_chr4:16165160	1.0	1.0	0.0	NA	3	NA	NA	NA	NA	TAPT1_exon_chr4:16165160
1	TM9SF1	62.5068	89.7347	0.5468	1.0	NC	No	No	2	TM9SF1_exon_chr14:24659014	0.9373	0.7884	-0.1489	NA	1	NA	NA	NA	NA	TM9SF1_exon_chr14:24659014
2	TM9SF1									TM9SF1_exon_chr14:24662475	0.041	0.2116	0.1707	NA	1	NA	NA	NA	NA	TM9SF1_exon_chr14:24662475
1	ARHGAP10	56.7512	47.7287	-0.2527	1.0	NC	No	No	3	ARHGAP10_exon_chr4:148768301	0.0182	0.0968	0.0786	NA	1	NA	NA	NA	NA	ARHGAP10_exon_chr4:148768301
2	ARHGAP10									ARHGAP10_exon_chr4:148778703	0.0144	0.3718	0.3575	NA	1	NA	NA	NA	NA	ARHGAP10_exon_chr4:148778703
3	ARHGAP10									ARHGAP10_exon_chr4:148993143	0.9674	0.5314	-0.436	NA	1	NA	NA	NA	NA	ARHGAP10_exon_chr4:148993143
1	CNP	126.2132	97.5001	-0.381	1.0	NC	No	No	1	CNP_exon_chr17:40125492	1.0	1.0	0.0	NA	1	NA	NA	NA	NA	CNP_exon_chr17:40125492
1	KLHL30	19.65	0.0	-6.825	0.1227	NC	No	No	1	KLHL30_exon_chr2:239059454	1.0	1.0	0.0	NA	1	NA	NA	NA	NA	KLHL30_exon_chr2:239059454
1	ZNF274	73.4784	44.8064	-0.7151	1.0	NC	No	No	1	ZNF274_exon_chr19:58723526	1.0	1.0	0.0	NA	2	0.8808	0.9403	0.0594	NA	ZNF274_exon_chr19:58723526
1	ZNF565	8.4043	9.534	0.2094	1.0	NC	No	No	1	ZNF565_exon_chr19:36674635	1.0	1.0	0.0	NA	1	NA	NA	NA	NA	ZNF565_exon_chr19:36674635
1	MAPRE1	588.9461	511.1719	-0.21	0.6932	NC	No	No	1	MAPRE1_exon_chr20:31436477	1.0	1.0	0.0	NA	4	0.7543	0.7789	0.0247	NA	MAPRE1_exon_chr20:31436477
1	DIP2C	28.1912	41.1651	0.5285	1.0	NC	No	No	1	DIP2C_exon_chr10:323517	1.0	1.0	0.0	NA	3	0.8992	0.8902	-0.009	NA	DIP2C_exon_chr10:323517
1	LOC100129917	9.6049	0.0	-5.7848	1.0	NC	No	No	1	LOC100129917_exon_chr4:775636	1.0	1.0	0.0	NA	1	NA	NA	NA	NA	LOC100129917_exon_chr4:775636
1	CLK1	253.6926	207.6641	-0.3003	1.0	NC	No	No	1	CLK1_exon_chr2:201718172	1.0	1.0	0.0	NA	1	NA	NA	NA	NA	CLK1_exon_chr2:201718172
1	WDR60	42.9816	98.8978	1.1974	1.0	NC	Yes	No	4	WDR60_exon_chr7:158663832	0.0063	0.4253	0.419	Up	1	NA	NA	NA	NA	WDR60_exon_chr7:158663832
2	WDR60									WDR60_exon_chr7:158669299	0.6967	0.276	-0.4206	NA	1	NA	NA	NA	NA	WDR60_exon_chr7:158669299
3	WDR60									WDR60_exon_chr7:158672374	0.1506	0.2874	0.1369	NA	1	NA	NA	NA	NA	WDR60_exon_chr7:158672374
4	WDR60									WDR60_exon_chr7:158738271	0.1465	0.0113	-0.1352	NA	1	NA	NA	NA	NA	WDR60_exon_chr7:158738271
1	LDOC1	152.023	83.8934	-0.8625	1.0	NC	No	No	1	LDOC1_exon_chrX:140271314	1.0	1.0	0.0	NA	1	NA	NA	NA	NA	LDOC1_exon_chrX:140271314
1	DPY19L3	62.8511	52.7938	-0.2656	1.0	NC	No	No	1	DPY19L3_exon_chr19:32972984	1.0	1.0	0.0	NA	3	0.9149	0.8698	-0.0451	NA	DPY19L3_exon_chr19:32972984
1	CDK4	462.791	390.8387	-0.2355	0.7134	NC	No	No	1	CDK4_exon_chr12:58142465	1.0	1.0	0.0	NA	1	NA	NA	NA	NA	CDK4_exon_chr12:58142465
1	DUSP3	168.3191	247.7304	0.5596	0.9125	NC	No	No	1	DUSP3_exon_chr17:41847182	1.0	1.0	0.0	NA	5	0.7065	0.6764	-0.03	NA	DUSP3_exon_chr17:41847182
1	CBFB	181.2162	167.847	-0.0991	1.0	NC	No	No	1	CBFB_exon_chr16:67132612	1.0	1.0	0.0	NA	7	0.7624	0.7737	0.0113	NA	CBFB_exon_chr16:67132612
1	NEIL3	34.2252	29.4385	-0.215	1.0	NC	No	No	1	NEIL3_exon_chr4:178283442	1.0	1.0	0.0	NA	3	NA	NA	NA	NA	NEIL3_exon_chr4:178283442
1	P3H2	127.3961	108.6477	-0.2331	1.0	NC	No	No	1	P3H2_exon_chr3:189675793	1.0	1.0	0.0	NA	3	0.9187	0.7107	-0.208	NA	P3H2_exon_chr3:189675793
1	WASL	250.6619	275.5438	0.1263	1.0	NC	No	No	2	WASL_exon_chr7:123324634	0.4811	0.3144	-0.1667	NA	1	NA	NA	NA	NA	WASL_exon_chr7:123324634
2	WASL									WASL_exon_chr7:123336801	0.5189	0.6856	0.1667	NA	1	NA	NA	NA	NA	WASL_exon_chr7:123336801
1	PSMA3	742.52	825.5041	0.153	0.727	NC	No	No	1	PSMA3_exon_chr14:58738568	1.0	1.0	0.0	NA	1	NA	NA	NA	NA	PSMA3_exon_chr14:58738568
1	TULP3	13.7883	11.0468	-0.3358	1.0	NC	No	No	1	TULP3_exon_chr12:3048476	1.0	1.0	0.0	NA	2	NA	NA	NA	NA	TULP3_exon_chr12:3048476
1	CCNL1	133.8917	77.7555	-0.7921	1.0	NC	No	No	2	CCNL1_exon_chr3:156866378	0.9046	0.8124	-0.0922	NA	1	NA	NA	NA	NA	CCNL1_exon_chr3:156866378
2	CCNL1									CCNL1_exon_chr3:156867766	0.0954	0.1876	0.0922	NA	3	0.1129	0.0825	-0.0304	NA	CCNL1_exon_chr3:156867766
1	RYR3	11.1517	0.0	-6.0072	1.0	NC	No	No	1	RYR3_exon_chr15:34157331	1.0	1.0	0.0	NA	2	NA	NA	NA	NA	RYR3_exon_chr15:34157331
1	NLRP4	0.0	8.4882	5.5468	1.0	NC	No	No	1	NLRP4_exon_chr19:56392835	1.0	1.0	0.0	NA	1	NA	NA	NA	NA	NLRP4_exon_chr19:56392835
1	TOR1A	146.4881	80.8279	-0.8696	1.0	NC	No	No	1	TOR1A_exon_chr9:132576501	1.0	1.0	0.0	NA	3	0.2145	0.422	0.2074	NA	TOR1A_exon_chr9:132576501
1	GMEB1	28.2858	15.1947	-0.8968	1.0	NC	No	No	1	GMEB1_exon_chr1:29040584	1.0	1.0	0.0	NA	2	NA	NA	NA	NA	GMEB1_exon_chr1:29040584
1	WIPF2	69.4351	71.994	0.0451	1.0	NC	No	No	1	WIPF2_exon_chr17:38434436	1.0	1.0	0.0	NA	4	0.6709	0.7226	0.0517	NA	WIPF2_exon_chr17:38434436
1	MAGEB2	14.7397	22.7161	0.6027	1.0	NC	No	No	1	MAGEB2_exon_chrX:30236692	1.0	1.0	0.0	NA	1	NA	NA	NA	NA	MAGEB2_exon_chrX:30236692
1	NELFB	183.1174	153.5206	-0.2646	1.0	NC	No	No	1	NELFB_exon_chr9:140167233	1.0	1.0	0.0	NA	1	NA	NA	NA	NA	NELFB_exon_chr9:140167233
1	KANSL1-AS1	10.8393	3.8583	-1.4857	1.0	NC	No	No	1	KANSL1-AS1_exon_chr17:44273733	1.0	1.0	0.0	NA	1	NA	NA	NA	NA	KANSL1-AS1_exon_chr17:44273733
1	PSMB5	487.3123	543.8586	0.1611	0.8204	NC	No	No	1	PSMB5_exon_chr14:23495584	1.0	1.0	0.0	NA	1	NA	NA	NA	NA	PSMB5_exon_chr14:23495584
1	B3GAT3	26.3168	35.2641	0.4092	1.0	NC	No	No	1	B3GAT3_exon_chr11:62383712	1.0	1.0	0.0	NA	1	NA	NA	NA	NA	B3GAT3_exon_chr11:62383712
1	POP5	51.5009	16.4497	-1.6434	1.0	NC	No	No	1	POP5_exon_chr12:121017215	1.0	1.0	0.0	NA	2	NA	NA	NA	NA	POP5_exon_chr12:121017215
1	E4F1	44.3138	78.4286	0.8365	1.0	NC	No	No	1	E4F1_exon_chr16:2285216	1.0	1.0	0.0	NA	1	NA	NA	NA	NA	E4F1_exon_chr16:2285216
1	MME	89.7908	96.635	0.0874	1.0	NC	No	No	1	MME_exon_chr3:154898148	1.0	1.0	0.0	NA	7	0.3593	0.4437	0.0845	NA	MME_exon_chr3:154898148
1	IGF2BP2	59.4842	127.9416	1.0875	0.9529	NC	No	No	1	IGF2BP2_exon_chr3:185363411	1.0	1.0	0.0	NA	1	NA	NA	NA	NA	IGF2BP2_exon_chr3:185363411
1	ZNF211	29.391	14.4042	-1.0251	1.0	NC	No	No	1	ZNF211_exon_chr19:58152071	1.0	1.0	0.0	NA	3	NA	NA	NA	NA	ZNF211_exon_chr19:58152071
1	CAMLG	130.9471	123.4549	-0.0769	1.0	NC	No	No	1	CAMLG_exon_chr5:134086448	1.0	1.0	0.0	NA	1	NA	NA	NA	NA	CAMLG_exon_chr5:134086448
1	H4C11	8.6634	10.2532	0.2315	1.0	NC	No	No	1	H4C11_exon_chr6:27791902	1.0	1.0	0.0	NA	1	NA	NA	NA	NA	H4C11_exon_chr6:27791902
1	SNORD13	0.0	2.1745	3.5696	1.0	NC	No	No	1	SNORD13_exon_chr8:33370992	1.0	1.0	0.0	NA	1	NA	NA	NA	NA	SNORD13_exon_chr8:33370992
1	KAT2A	31.2269	51.5827	0.7405	1.0	NC	No	No	1	KAT2A_exon_chr17:40265860	1.0	1.0	0.0	NA	1	NA	NA	NA	NA	KAT2A_exon_chr17:40265860
1	PSIP1	2436.6946	4858.095	0.9961	0.1336	NC	No	No	2	PSIP1_exon_chr9:15469991	0.2231	0.2056	-0.0175	NA	1	NA	NA	NA	NA	PSIP1_exon_chr9:15469991
2	PSIP1									PSIP1_exon_chr9:15474235	0.6591	0.6968	0.0377	NA	3	0.5324	0.5481	0.0157	NA	PSIP1_exon_chr9:15474235
1	SLC7A6OS	37.2322	84.4626	1.1637	1.0	NC	No	No	1	SLC7A6OS_exon_chr16:68335308	1.0	1.0	0.0	NA	5	0.5494	0.5298	-0.0196	NA	SLC7A6OS_exon_chr16:68335308
1	COPS7B	49.6166	61.2721	0.3134	1.0	NC	No	No	1	COPS7B_exon_chr2:232672196	1.0	1.0	0.0	NA	3	0.5425	0.1424	-0.4001	NA	COPS7B_exon_chr2:232672196
1	PPFIBP1	96.877	100.2859	0.0597	1.0	NC	No	No	2	PPFIBP1_exon_chr12:27813816	0.1456	0.4017	0.2561	NA	1	NA	NA	NA	NA	PPFIBP1_exon_chr12:27813816
2	PPFIBP1									PPFIBP1_exon_chr12:27845728	0.8544	0.5983	-0.2561	NA	1	NA	NA	NA	NA	PPFIBP1_exon_chr12:27845728
1	SF3B5	400.005	580.394	0.5355	0.3346	NC	No	No	1	SF3B5_exon_chr6:144416710	1.0	1.0	0.0	NA	1	NA	NA	NA	NA	SF3B5_exon_chr6:144416710
1	LMTK2	23.1981	39.9343	0.7776	1.0	NC	No	No	2	LMTK2_exon_chr7:97820925	0.4754	0.0	-0.4754	NA	1	NA	NA	NA	NA	LMTK2_exon_chr7:97820925
2	LMTK2									LMTK2_exon_chr7:97834775	0.5246	1.0	0.4754	NA	2	NA	NA	NA	NA	LMTK2_exon_chr7:97834775
1	TMED2	888.5865	836.254	-0.0841	0.8393	NC	No	No	1	TMED2_exon_chr12:124081151	1.0	1.0	0.0	NA	1	NA	NA	NA	NA	TMED2_exon_chr12:124081151
1	UGP2	1065.7493	882.4943	-0.2732	0.6331	NC	No	No	1	UGP2_exon_chr2:64118253	1.0	1.0	0.0	NA	1	NA	NA	NA	NA	UGP2_exon_chr2:64118253
1	ZNF606	9.0046	1.8039	-2.3177	1.0	NC	No	No	1	ZNF606_exon_chr19:58491647	1.0	1.0	0.0	NA	1	NA	NA	NA	NA	ZNF606_exon_chr19:58491647
1	CDK16	310.7586	213.1067	-0.5339	0.7185	NC	No	No	1	CDK16_exon_chrX:47088129	1.0	1.0	0.0	NA	2	0.8347	0.8816	0.0469	NA	CDK16_exon_chrX:47088129
1	POLA1	11.3812	4.7045	-1.2902	1.0	NC	No	No	1	POLA1_exon_chrX:25013921	1.0	1.0	0.0	NA	1	NA	NA	NA	NA	POLA1_exon_chrX:25013921
1	POLG2	92.7818	73.6915	-0.3322	1.0	NC	No	No	1	POLG2_exon_chr17:62474105	1.0	1.0	0.0	NA	1	NA	NA	NA	NA	POLG2_exon_chr17:62474105
1	ZNF839	3.0875	1.6075	-0.9619	1.0	NC	No	No	1	ZNF839_exon_chr14:102807659	1.0	1.0	0.0	NA	1	NA	NA	NA	NA	ZNF839_exon_chr14:102807659
1	MAN2C1	14.5552	11.7848	-0.318	1.0	NC	No	No	1	MAN2C1_exon_chr15:75648373	1.0	1.0	0.0	NA	1	NA	NA	NA	NA	MAN2C1_exon_chr15:75648373
1	PPCS	249.7796	197.52	-0.3378	0.9155	NC	No	No	1	PPCS_exon_chr1:42925273	1.0	1.0	0.0	NA	1	NA	NA	NA	NA	PPCS_exon_chr1:42925273
1	CIAO1	152.1002	164.4999	0.1059	1.0	NC	No	No	1	CIAO1_exon_chr2:96936848	1.0	1.0	0.0	NA	4	0.1211	0.1825	0.0615	NA	CIAO1_exon_chr2:96936848
1	MARVELD2	80.9593	46.2949	-0.7871	1.0	NC	No	No	1	MARVELD2_exon_chr5:68737358	1.0	1.0	0.0	NA	5	0.8781	0.9211	0.0429	NA	MARVELD2_exon_chr5:68737358
1	THUMPD2	137.0595	140.7304	0.0481	1.0	NC	No	No	2	THUMPD2_exon_chr2:39964199	0.5453	0.3425	-0.2028	NA	2	0.834	0.9761	0.1421	NA	THUMPD2_exon_chr2:39964199
2	THUMPD2									THUMPD2_exon_chr2:39997259	0.4547	0.6575	0.2028	NA	2	0.2041	0.2287	0.0246	NA	THUMPD2_exon_chr2:39997259
1	MTMR10	19.0307	21.8646	0.1826	1.0	NC	No	No	1	MTMR10_exon_chr15:31234275	1.0	1.0	0.0	NA	1	NA	NA	NA	NA	MTMR10_exon_chr15:31234275
1	MACO1	43.7494	79.1322	0.8713	1.0	NC	No	No	2	MACO1_exon_chr1:25812103	0.2462	0.1095	-0.1368	NA	1	NA	NA	NA	NA	MACO1_exon_chr1:25812103
2	MACO1									MACO1_exon_chr1:25824754	0.7127	0.8775	0.1648	NA	4	NA	NA	NA	NA	MACO1_exon_chr1:25824754
1	PMF1	98.518	85.1213	-0.2127	1.0	NC	No	No	2	PMF1_exon_chr1:156180030	0.5602	0.5466	-0.0135	NA	1	NA	NA	NA	NA	PMF1_exon_chr1:156180030
2	PMF1									PMF1_exon_chr1:156209338	0.4398	0.4534	0.0135	NA	1	NA	NA	NA	NA	PMF1_exon_chr1:156209338
1	REV1	58.6172	53.7457	-0.1368	1.0	NC	No	No	2	REV1_exon_chr2:100017815	1.0	0.8806	-0.1194	NA	1	NA	NA	NA	NA	REV1_exon_chr2:100017815
2	REV1									REV1_exon_chr2:100065966	0.0	0.1194	0.1194	NA	2	0.4823	0.3912	-0.0911	NA	REV1_exon_chr2:100065966
1	CRISPLD1	16.1834	17.0013	0.089	1.0	NC	No	No	1	CRISPLD1_exon_chr8:75944425	1.0	1.0	0.0	NA	2	NA	NA	NA	NA	CRISPLD1_exon_chr8:75944425
1	MANSC1	0.0	12.4651	6.0959	1.0	NC	No	No	1	MANSC1_exon_chr12:12483892	1.0	1.0	0.0	NA	2	NA	NA	NA	NA	MANSC1_exon_chr12:12483892
1	ZNF578	31.3669	27.0736	-0.2039	1.0	NC	No	No	1	ZNF578_exon_chr19:53013824	1.0	1.0	0.0	NA	3	0.9539	0.7844	-0.1695	NA	ZNF578_exon_chr19:53013824
1	ZNF69	5.9616	20.295	1.7487	0.9925	NC	No	No	2	ZNF69_exon_chr19:12015463	0.0	0.256	0.256	NA	1	NA	NA	NA	NA	ZNF69_exon_chr19:12015463
2	ZNF69									ZNF69_exon_chr19:12024223	1.0	0.744	-0.256	NA	1	NA	NA	NA	NA	ZNF69_exon_chr19:12024223
1	FBXL18	97.806	82.9501	-0.2263	1.0	NC	No	No	1	FBXL18_exon_chr7:5521562	1.0	1.0	0.0	NA	2	0.6533	0.7739	0.1206	NA	FBXL18_exon_chr7:5521562
1	ZNF619	1.8039	3.6383	1.0053	1.0	NC	No	No	1	ZNF619_exon_chr3:40528296	1.0	1.0	0.0	NA	1	NA	NA	NA	NA	ZNF619_exon_chr3:40528296
1	EP400	86.0681	34.4247	-1.3376	1.0	NC	No	No	2	EP400_exon_chr12:132475180	0.3331	0.0168	-0.3163	NA	1	NA	NA	NA	NA	EP400_exon_chr12:132475180
2	EP400									EP400_exon_chr12:132561945	0.6669	0.9832	0.3163	NA	4	0.519	0.6426	0.1236	NA	EP400_exon_chr12:132561945
1	KLLN	8.2955	0.0	-5.5676	1.0	NC	No	No	1	KLLN_exon_chr10:89623194	1.0	1.0	0.0	NA	1	NA	NA	NA	NA	KLLN_exon_chr10:89623194
1	RCN2	213.2532	188.8235	-0.1795	1.0	NC	No	No	1	RCN2_exon_chr15:77241410	1.0	1.0	0.0	NA	1	NA	NA	NA	NA	RCN2_exon_chr15:77241410
1	PGRMC2	335.8486	269.6888	-0.3115	0.635	NC	No	No	1	PGRMC2_exon_chr4:129192568	1.0	1.0	0.0	NA	7	0.8786	0.8456	-0.033	NA	PGRMC2_exon_chr4:129192568
1	PDPN	0.0	4.1155	4.5051	1.0	NC	No	No	1	PDPN_exon_chr1:13942399	1.0	1.0	0.0	NA	1	NA	NA	NA	NA	PDPN_exon_chr1:13942399
1	RGS3	30.1395	11.9453	-1.3177	1.0	NC	No	No	1	RGS3_exon_chr9:116359047	1.0	1.0	0.0	NA	1	NA	NA	NA	NA	RGS3_exon_chr9:116359047
1	PYGL	360.3972	277.2632	-0.3845	0.5107	NC	No	No	1	PYGL_exon_chr14:51372274	1.0	1.0	0.0	NA	1	NA	NA	NA	NA	PYGL_exon_chr14:51372274
1	MIB2	8.4004	18.6465	1.1332	0.9388	NC	No	No	2	MIB2_exon_chr1:1552457	0.0	0.3306	0.3306	NA	1	NA	NA	NA	NA	MIB2_exon_chr1:1552457
2	MIB2									MIB2_exon_chr1:1565671	1.0	0.6694	-0.3306	NA	1	NA	NA	NA	NA	MIB2_exon_chr1:1565671
1	TJAP1	13.6489	13.4364	-0.0205	1.0	NC	No	No	1	TJAP1_exon_chr6:43472498	1.0	1.0	0.0	NA	1	NA	NA	NA	NA	TJAP1_exon_chr6:43472498
1	RB1	36.9507	28.4699	-0.3633	1.0	NC	No	No	1	RB1_exon_chr13:49054133	1.0	1.0	0.0	NA	1	NA	NA	NA	NA	RB1_exon_chr13:49054133
1	KCTD5	75.8768	40.4056	-0.9245	1.0	NC	No	No	1	KCTD5_exon_chr16:2757298	1.0	1.0	0.0	NA	1	NA	NA	NA	NA	KCTD5_exon_chr16:2757298
1	COX15	43.4711	57.2348	0.3924	1.0	NC	No	No	1	COX15_exon_chr10:101474475	1.0	1.0	0.0	NA	3	NA	NA	NA	NA	COX15_exon_chr10:101474475
1	SLC4A8	0.0	5.1172	4.8108	1.0	NC	No	No	2	SLC4A8_exon_chr12:51868125	nan	0.5646	nan	NA	1	NA	NA	NA	NA	SLC4A8_exon_chr12:51868125
2	SLC4A8									SLC4A8_exon_chr12:51901209	nan	0.4354	nan	NA	1	NA	NA	NA	NA	SLC4A8_exon_chr12:51901209
1	SNHG7	160.8495	184.6653	0.1868	1.0	NC	No	No	1	SNHG7_exon_chr9:139621538	1.0	1.0	0.0	NA	3	0.5019	0.481	-0.0208	NA	SNHG7_exon_chr9:139621538
1	GDPD5	0.0	18.1984	6.642	0.2547	NC	No	No	1	GDPD5_exon_chr11:75146700	1.0	1.0	0.0	NA	1	NA	NA	NA	NA	GDPD5_exon_chr11:75146700
1	CLPTM1L	112.5428	89.666	-0.3379	1.0	NC	No	No	1	CLPTM1L_exon_chr5:1318568	1.0	1.0	0.0	NA	2	0.6594	0.7161	0.0567	NA	CLPTM1L_exon_chr5:1318568
1	MORF4L2	2386.1539	2554.8636	0.0969	0.8155	NC	No	No	1	MORF4L2_exon_chrX:102931979	1.0	1.0	0.0	NA	1	NA	NA	NA	NA	MORF4L2_exon_chrX:102931979
1	SNORA80E	0.271	10.9943	4.925	1.0	NC	No	No	1	SNORA80E_exon_chr1:155889833	1.0	1.0	0.0	NA	1	NA	NA	NA	NA	SNORA80E_exon_chr1:155889833
1	ALB	0.6003	7.3946	4.3457	1.0	NC	No	No	1	ALB_exon_chr4:74286808	1.0	1.0	0.0	NA	1	NA	NA	NA	NA	ALB_exon_chr4:74286808
1	SLC25A43	38.3498	44.4022	0.2096	1.0	NC	No	No	1	SLC25A43_exon_chrX:118586827	1.0	1.0	0.0	NA	1	NA	NA	NA	NA	SLC25A43_exon_chrX:118586827
1	OSBPL1A	6.2326	0.0	-5.1797	1.0	NC	No	No	1	OSBPL1A_exon_chr18:21743245	1.0	1.0	0.0	NA	1	NA	NA	NA	NA	OSBPL1A_exon_chr18:21743245
1	GSR	45.1024	84.607	0.9103	1.0	NC	No	No	1	GSR_exon_chr8:30537186	1.0	1.0	0.0	NA	2	0.7713	0.8153	0.044	NA	GSR_exon_chr8:30537186
1	URB1	17.672	32.7682	0.8776	1.0	NC	No	No	1	URB1_exon_chr21:33687410	1.0	1.0	0.0	NA	2	NA	NA	NA	NA	URB1_exon_chr21:33687410
1	CGB3	199.189	172.7821	-0.2062	1.0	NC	No	No	1	CGB3_exon_chr19:49526457	1.0	1.0	0.0	NA	1	NA	NA	NA	NA	CGB3_exon_chr19:49526457
1	KATNBL1	85.768	80.5457	-0.0921	1.0	NC	No	No	1	KATNBL1_exon_chr15:34434572	1.0	1.0	0.0	NA	6	0.4258	0.4166	-0.0092	NA	KATNBL1_exon_chr15:34434572
1	MAGEA8	89.9075	85.1243	-0.0815	1.0	NC	No	No	1	MAGEA8_exon_chrX:149012983	1.0	1.0	0.0	NA	1	NA	NA	NA	NA	MAGEA8_exon_chrX:149012983
1	TMEM260	17.5374	19.3133	0.129	1.0	NC	No	No	1	TMEM260_exon_chr14:57113960	1.0	1.0	0.0	NA	2	NA	NA	NA	NA	TMEM260_exon_chr14:57113960
1	EFEMP1	9.924	2.2505	-2.1514	1.0	NC	No	No	1	EFEMP1_exon_chr2:56094369	1.0	1.0	0.0	NA	1	NA	NA	NA	NA	EFEMP1_exon_chr2:56094369
1	DCAF17	14.3833	24.0397	0.7444	1.0	NC	No	No	1	DCAF17_exon_chr2:172337483	1.0	1.0	0.0	NA	2	NA	NA	NA	NA	DCAF17_exon_chr2:172337483
1	DNAJA1	1233.6359	1133.2492	-0.1237	0.7904	NC	No	No	2	DNAJA1_exon_chr9:33026810	0.0819	0.0905	0.0086	NA	1	NA	NA	NA	NA	DNAJA1_exon_chr9:33026810
2	DNAJA1									DNAJA1_exon_chr9:33038682	0.8977	0.9041	0.0064	NA	3	0.2933	0.1972	-0.0961	NA	DNAJA1_exon_chr9:33038682
1	TMBIM6	2115.5444	1554.0291	-0.4441	0.0447	NC	No	No	1	TMBIM6_exon_chr12:50156655	1.0	1.0	0.0	NA	3	0.8137	0.8328	0.0191	NA	TMBIM6_exon_chr12:50156655
1	MYOF	255.5187	195.3095	-0.3965	0.8123	NC	No	No	1	MYOF_exon_chr10:95066758	1.0	1.0	0.0	NA	1	NA	NA	NA	NA	MYOF_exon_chr10:95066758
1	CNNM3	37.8217	34.0562	-0.1681	1.0	NC	No	No	1	CNNM3_exon_chr2:97498288	1.0	1.0	0.0	NA	4	0.0244	0.3628	0.3384	NA	CNNM3_exon_chr2:97498288
1	IDH3G	286.1407	275.5891	-0.0514	1.0	NC	No	No	1	IDH3G_exon_chrX:153051727	1.0	1.0	0.0	NA	1	NA	NA	NA	NA	IDH3G_exon_chrX:153051727
1	AGGF1	207.6626	149.9656	-0.4631	0.8643	NC	No	No	1	AGGF1_exon_chr5:76358876	1.0	1.0	0.0	NA	7	0.4849	0.4013	-0.0836	NA	AGGF1_exon_chr5:76358876
1	DNASE2	70.8025	106.6983	0.5989	1.0	NC	No	No	1	DNASE2_exon_chr19:12987177	1.0	1.0	0.0	NA	3	0.4603	0.4879	0.0276	NA	DNASE2_exon_chr19:12987177
1	MAP3K1	23.9766	30.2941	0.3217	1.0	NC	No	No	1	MAP3K1_exon_chr5:56189357	1.0	1.0	0.0	NA	2	0.8638	0.7959	-0.068	NA	MAP3K1_exon_chr5:56189357
1	PLBD2	47.9044	79.6359	0.7409	1.0	NC	No	No	1	PLBD2_exon_chr12:113826263	1.0	1.0	0.0	NA	3	0.4739	0.7346	0.2607	NA	PLBD2_exon_chr12:113826263
1	RITA1	13.611	34.0799	1.2939	1.0	NC	No	No	1	RITA1_exon_chr12:113629114	1.0	1.0	0.0	NA	2	NA	NA	NA	NA	RITA1_exon_chr12:113629114
1	ZNF518A	40.2517	28.3595	-0.5111	1.0	NC	No	No	1	ZNF518A_exon_chr10:97915953	1.0	1.0	0.0	NA	5	0.8732	0.4752	-0.3981	NA	ZNF518A_exon_chr10:97915953
1	RPS6	14208.9813	13247.9178	-0.1013	0.7516	NC	No	No	1	RPS6_exon_chr9:19376386	1.0	1.0	0.0	NA	1	NA	NA	NA	NA	RPS6_exon_chr9:19376386
1	NUP188	173.4844	148.9708	-0.2245	1.0	NC	No	No	1	NUP188_exon_chr9:131768780	1.0	1.0	0.0	NA	1	NA	NA	NA	NA	NUP188_exon_chr9:131768780
1	USF2	248.4868	154.5522	-0.6703	0.8782	NC	No	No	1	USF2_exon_chr19:35770069	1.0	1.0	0.0	NA	1	NA	NA	NA	NA	USF2_exon_chr19:35770069
1	MIR4700	47.6034	31.7717	-0.597	1.0	NC	No	No	1	MIR4700_exon_chr12:121157722	1.0	1.0	0.0	NA	1	NA	NA	NA	NA	MIR4700_exon_chr12:121157722
1	RC3H1	22.3142	21.1995	-0.0565	1.0	NC	No	No	1	RC3H1_exon_chr1:173908012	1.0	1.0	0.0	NA	4	NA	NA	NA	NA	RC3H1_exon_chr1:173908012
1	CHMP2A	328.4743	325.2355	-0.0163	0.9365	NC	No	No	1	CHMP2A_exon_chr19:59063143	1.0	1.0	0.0	NA	1	NA	NA	NA	NA	CHMP2A_exon_chr19:59063143
1	GSDME	9.8995	24.2511	1.2568	0.8887	NC	No	No	1	GSDME_exon_chr7:24738878	1.0	1.0	0.0	NA	1	NA	NA	NA	NA	GSDME_exon_chr7:24738878
1	NAMPT	199.3582	181.9934	-0.1286	1.0	NC	No	No	1	NAMPT_exon_chr7:105891639	1.0	1.0	0.0	NA	5	0.1233	0.0995	-0.0238	NA	NAMPT_exon_chr7:105891639
1	DNAAF5	188.9236	156.2493	-0.2771	1.0	NC	No	No	1	DNAAF5_exon_chr7:825153	1.0	1.0	0.0	NA	1	NA	NA	NA	NA	DNAAF5_exon_chr7:825153
1	HEATR5B	23.1675	54.8362	1.2666	0.9009	NC	No	No	1	HEATR5B_exon_chr2:37208937	1.0	1.0	0.0	NA	2	0.0723	0.2269	0.1546	NA	HEATR5B_exon_chr2:37208937
1	WDR45	235.5947	242.0239	0.0299	1.0	NC	No	No	1	WDR45_exon_chrX:48932571	1.0	1.0	0.0	NA	2	0.5012	0.5143	0.0131	NA	WDR45_exon_chrX:48932571
1	ZNF687-AS1	3.2518	8.7451	1.4074	1.0	NC	No	No	1	ZNF687-AS1_exon_chr1:151252734	1.0	1.0	0.0	NA	1	NA	NA	NA	NA	ZNF687-AS1_exon_chr1:151252734
1	TUBB3	141.9237	123.131	-0.2114	1.0	NC	No	No	1	TUBB3_exon_chr16:90001136	1.0	1.0	0.0	NA	1	NA	NA	NA	NA	TUBB3_exon_chr16:90001136
1	ZNF720	0.542	22.8482	5.1923	0.1916	NC	No	No	1	ZNF720_exon_chr16:31770677	1.0	1.0	0.0	NA	1	NA	NA	NA	NA	ZNF720_exon_chr16:31770677
1	DHRS7B	108.1495	263.0443	1.2974	0.0273	UP	No	No	1	DHRS7B_exon_chr17:21094260	1.0	1.0	0.0	NA	1	NA	NA	NA	NA	DHRS7B_exon_chr17:21094260
1	IL10RB	3.5811	17.7881	2.2962	0.8357	NC	No	No	1	IL10RB_exon_chr21:34668488	1.0	1.0	0.0	NA	1	NA	NA	NA	NA	IL10RB_exon_chr21:34668488
1	NCAPH	321.7977	330.1481	0.0436	0.931	NC	No	No	1	NCAPH_exon_chr2:97039029	1.0	1.0	0.0	NA	1	NA	NA	NA	NA	NCAPH_exon_chr2:97039029
1	LINC01762	0.0	3.8583	4.4123	1.0	NC	No	No	1	LINC01762_exon_chr1:116995790	1.0	1.0	0.0	NA	1	NA	NA	NA	NA	LINC01762_exon_chr1:116995790
1	SLC30A1	109.0319	150.8163	0.4568	1.0	NC	No	No	1	SLC30A1_exon_chr1:211749631	1.0	1.0	0.0	NA	4	0.8139	0.7641	-0.0498	NA	SLC30A1_exon_chr1:211749631
1	PET100	142.584	275.5395	0.9346	0.283	NC	No	No	1	PET100_exon_chr19:7696358	1.0	1.0	0.0	NA	1	NA	NA	NA	NA	PET100_exon_chr19:7696358
1	SLC25A13	340.6852	391.0452	0.2067	0.7866	NC	No	No	1	SLC25A13_exon_chr7:95750689	1.0	1.0	0.0	NA	3	0.5761	0.7116	0.1355	NA	SLC25A13_exon_chr7:95750689
1	LOC554206	9.6049	0.0	-5.7848	1.0	NC	No	No	1	LOC554206_exon_chr16:25043061	1.0	1.0	0.0	NA	1	NA	NA	NA	NA	LOC554206_exon_chr16:25043061
1	ANGPT4	1.0839	0.5144	-1.0503	1.0	NC	No	No	1	ANGPT4_exon_chr20:853763	1.0	1.0	0.0	NA	1	NA	NA	NA	NA	ANGPT4_exon_chr20:853763
1	TNK2	45.7274	16.9543	-1.4293	1.0	NC	No	No	1	TNK2_exon_chr3:195591058	1.0	1.0	0.0	NA	1	NA	NA	NA	NA	TNK2_exon_chr3:195591058
1	STAG3	38.9462	50.4478	0.3502	1.0	NC	No	No	1	STAG3_exon_chr7:99811629	1.0	1.0	0.0	NA	1	NA	NA	NA	NA	STAG3_exon_chr7:99811629
1	SRSF4	189.8389	202.4976	0.105	1.0	NC	No	No	1	SRSF4_exon_chr1:29475738	1.0	1.0	0.0	NA	4	0.5839	0.5183	-0.0656	NA	SRSF4_exon_chr1:29475738
1	PCDHGA1	96.5063	28.3991	-1.7741	1.0	NC	No	No	1	PCDHGA1_exon_chr5:140890513	1.0	1.0	0.0	NA	1	NA	NA	NA	NA	PCDHGA1_exon_chr5:140890513
1	C15orf65	6.0031	0.0	-5.1024	1.0	NC	No	No	1	C15orf65_exon_chr15:55710420	1.0	1.0	0.0	NA	1	NA	NA	NA	NA	C15orf65_exon_chr15:55710420
1	ARHGEF12	54.244	103.1216	0.9471	1.0	NC	No	No	1	ARHGEF12_exon_chr11:120355775	1.0	1.0	0.0	NA	1	NA	NA	NA	NA	ARHGEF12_exon_chr11:120355775
1	TECR	665.2504	840.0292	0.3346	0.391	NC	No	No	1	TECR_exon_chr19:14676555	1.0	1.0	0.0	NA	1	NA	NA	NA	NA	TECR_exon_chr19:14676555
1	IFI27L2	34.6236	17.5026	-0.9891	1.0	NC	No	No	1	IFI27L2_exon_chr14:94594329	1.0	1.0	0.0	NA	1	NA	NA	NA	NA	IFI27L2_exon_chr14:94594329
1	IL17RE	4.5107	9.1381	1.03	1.0	NC	No	No	1	IL17RE_exon_chr3:9956934	1.0	1.0	0.0	NA	1	NA	NA	NA	NA	IL17RE_exon_chr3:9956934
1	GPR158	17.2923	1.8647	-3.1956	0.7726	NC	No	No	1	GPR158_exon_chr10:25886700	1.0	1.0	0.0	NA	1	NA	NA	NA	NA	GPR158_exon_chr10:25886700
1	CPPED1	47.6058	27.6558	-0.7704	1.0	NC	No	No	1	CPPED1_exon_chr16:12758972	1.0	1.0	0.0	NA	4	0.3519	0.2048	-0.1471	NA	CPPED1_exon_chr16:12758972
1	GPR78	12.8484	11.2529	-0.1983	1.0	NC	No	No	1	GPR78_exon_chr4:8588780	1.0	1.0	0.0	NA	2	NA	NA	NA	NA	GPR78_exon_chr4:8588780
1	SUV39H2	96.0748	35.0551	-1.444	1.0	NC	No	Yes	1	SUV39H2_exon_chr10:14944404	1.0	1.0	0.0	NA	3	0.9389	0.67	-0.2689	Both	SUV39H2_exon_chr10:14944404
1	RABL2A	10.9387	19.3551	0.8038	1.0	NC	No	No	1	RABL2A_exon_chr2:114399607	1.0	1.0	0.0	NA	1	NA	NA	NA	NA	RABL2A_exon_chr2:114399607
1	ARL2	131.0631	226.1674	0.78	0.3577	NC	No	No	1	ARL2_exon_chr11:64789192	1.0	1.0	0.0	NA	1	NA	NA	NA	NA	ARL2_exon_chr11:64789192
1	RMDN1	162.6048	77.6424	-1.0738	1.0	NC	No	No	1	RMDN1_exon_chr8:87486587	1.0	1.0	0.0	NA	3	0.2747	0.2988	0.0241	NA	RMDN1_exon_chr8:87486587
1	PRKRA	121.5778	164.2981	0.4369	1.0	NC	No	No	1	PRKRA_exon_chr2:179296981	1.0	1.0	0.0	NA	4	0.5301	0.5945	0.0643	NA	PRKRA_exon_chr2:179296981
1	CPSF6	342.064	299.5993	-0.1811	0.8035	NC	No	No	1	CPSF6_exon_chr12:69663291	1.0	1.0	0.0	NA	7	0.2377	0.06	-0.1777	NA	CPSF6_exon_chr12:69663291
1	COPS8	182.917	189.4483	0.0473	1.0	NC	No	No	1	COPS8_exon_chr2:238006305	1.0	1.0	0.0	NA	8	0.4488	0.4623	0.0135	NA	COPS8_exon_chr2:238006305
1	TFAP2C	670.6281	682.8866	0.0255	0.9308	NC	No	No	1	TFAP2C_exon_chr20:55212783	1.0	1.0	0.0	NA	1	NA	NA	NA	NA	TFAP2C_exon_chr20:55212783
1	MIR6807	766.0496	750.4598	-0.0227	0.9405	NC	No	No	1	MIR6807_exon_chr19:59061513	1.0	1.0	0.0	NA	1	NA	NA	NA	NA	MIR6807_exon_chr19:59061513
1	SGMS1	61.8755	38.1091	-0.6967	1.0	NC	No	No	1	SGMS1_exon_chr10:52067081	1.0	1.0	0.0	NA	2	NA	NA	NA	NA	SGMS1_exon_chr10:52067081
1	STK17A	166.6354	208.5801	0.3173	0.9434	NC	No	No	1	STK17A_exon_chr7:43664116	1.0	1.0	0.0	NA	4	0.008	0.097	0.089	NA	STK17A_exon_chr7:43664116
1	RPS6KC1	67.1094	49.4326	-0.4221	1.0	NC	No	No	1	RPS6KC1_exon_chr1:213445866	1.0	1.0	0.0	NA	3	0.0	0.0872	0.0872	NA	RPS6KC1_exon_chr1:213445866
1	LINC01037	1.8969	6.5354	1.7551	1.0	NC	No	No	1	LINC01037_exon_chr1:187446151	1.0	1.0	0.0	NA	1	NA	NA	NA	NA	LINC01037_exon_chr1:187446151
1	IL18	29.9037	11.6933	-1.3563	1.0	NC	No	No	1	IL18_exon_chr11:112014540	1.0	1.0	0.0	NA	1	NA	NA	NA	NA	IL18_exon_chr11:112014540
1	BTBD6	73.2758	36.2277	-1.0205	1.0	NC	No	No	1	BTBD6_exon_chr14:105715976	1.0	1.0	0.0	NA	1	NA	NA	NA	NA	BTBD6_exon_chr14:105715976
1	LINC00958	17.2268	23.6558	0.4786	1.0	NC	No	No	1	LINC00958_exon_chr11:13002546	1.0	1.0	0.0	NA	3	NA	NA	NA	NA	LINC00958_exon_chr11:13002546
1	RANBP3	49.8683	59.8488	0.266	1.0	NC	No	No	1	RANBP3_exon_chr19:5917664	1.0	1.0	0.0	NA	3	0.3822	0.3022	-0.08	NA	RANBP3_exon_chr19:5917664
1	PIAS4	90.5975	85.395	-0.0665	1.0	NC	No	No	1	PIAS4_exon_chr19:4037613	1.0	1.0	0.0	NA	2	0.6034	0.7133	0.1099	NA	PIAS4_exon_chr19:4037613
1	LINC01356	267.4123	243.4356	-0.1337	1.0	NC	No	No	1	LINC01356_exon_chr1:113363163	1.0	1.0	0.0	NA	1	NA	NA	NA	NA	LINC01356_exon_chr1:113363163
1	PARK7	1183.7399	948.0704	-0.3201	0.3071	NC	No	No	1	PARK7_exon_chr1:8044953	1.0	1.0	0.0	NA	1	NA	NA	NA	NA	PARK7_exon_chr1:8044953
1	ZNF689	18.7082	17.6831	-0.0786	1.0	NC	No	No	1	ZNF689_exon_chr16:30616768	1.0	1.0	0.0	NA	1	NA	NA	NA	NA	ZNF689_exon_chr16:30616768
1	GUSBP1	54.7773	46.6682	-0.241	1.0	NC	No	No	2	GUSBP1_exon_chr5:21473465	0.83	0.8432	0.0132	NA	1	NA	NA	NA	NA	GUSBP1_exon_chr5:21473465
2	GUSBP1									GUSBP1_exon_chr5:21585638	0.17	0.1568	-0.0132	NA	1	NA	NA	NA	NA	GUSBP1_exon_chr5:21585638
1	GPR87	88.8949	26.3158	-1.7593	1.0	NC	No	No	1	GPR87_exon_chr3:151012999	1.0	1.0	0.0	NA	1	NA	NA	NA	NA	GPR87_exon_chr3:151012999
1	PIGM	4.8025	5.1884	0.1333	1.0	NC	No	No	1	PIGM_exon_chr1:160001780	1.0	1.0	0.0	NA	2	NA	NA	NA	NA	PIGM_exon_chr1:160001780
1	STARD13	14.3159	15.673	0.1117	1.0	NC	No	No	1	STARD13_exon_chr13:33679847	1.0	1.0	0.0	NA	1	NA	NA	NA	NA	STARD13_exon_chr13:33679847
1	ZBTB25	34.2782	27.9843	-0.3074	1.0	NC	No	No	2	ZBTB25_exon_chr14:64916356	0.3952	0.4635	0.0684	NA	7	NA	NA	NA	NA	ZBTB25_exon_chr14:64916356
2	ZBTB25									ZBTB25_exon_chr14:64954775	0.6048	0.5365	-0.0684	NA	1	NA	NA	NA	NA	ZBTB25_exon_chr14:64954775
1	SEC61A2	0.0	25.7401	7.1417	0.062	UP	No	No	1	SEC61A2_exon_chr10:12206266	1.0	1.0	0.0	NA	2	NA	NA	NA	NA	SEC61A2_exon_chr10:12206266
1	JPT2	713.4134	727.0021	0.0313	0.9476	NC	No	No	1	JPT2_exon_chr16:1748811	1.0	1.0	0.0	NA	7	0.6737	0.6527	-0.021	NA	JPT2_exon_chr16:1748811
1	EPHB3	106.3224	62.6022	-0.7652	1.0	NC	No	No	1	EPHB3_exon_chr3:184299301	1.0	1.0	0.0	NA	1	NA	NA	NA	NA	EPHB3_exon_chr3:184299301
1	NOL7	556.551	524.613	-0.0834	0.8817	NC	No	No	1	NOL7_exon_chr6:13620985	1.0	1.0	0.0	NA	5	0.0476	0.0788	0.0311	NA	NOL7_exon_chr6:13620985
1	UBE2E2	166.9211	84.554	-0.9928	0.8123	NC	No	No	1	UBE2E2_exon_chr3:23631224	1.0	1.0	0.0	NA	6	0.0686	0.0	-0.0686	NA	UBE2E2_exon_chr3:23631224
1	GPR89A	102.0049	107.2422	0.0684	1.0	NC	No	No	1	GPR89A_exon_chr1:145765225	1.0	1.0	0.0	NA	1	NA	NA	NA	NA	GPR89A_exon_chr1:145765225
1	RPL19	11308.9437	11853.1463	0.0677	0.8395	NC	No	No	1	RPL19_exon_chr17:37360777	1.0	1.0	0.0	NA	1	NA	NA	NA	NA	RPL19_exon_chr17:37360777
1	A2ML1	6.9316	0.3706	-4.3763	1.0	NC	No	No	1	A2ML1_exon_chr12:9028653	1.0	1.0	0.0	NA	2	NA	NA	NA	NA	A2ML1_exon_chr12:9028653
1	DDX5	1570.7031	1423.2874	-0.1436	0.7848	NC	No	No	1	DDX5_exon_chr17:62496444	1.0	1.0	0.0	NA	1	NA	NA	NA	NA	DDX5_exon_chr17:62496444
1	PMS2P1	2.1679	0.0	-3.6669	1.0	NC	No	No	1	PMS2P1_exon_chr7:99918707	1.0	1.0	0.0	NA	1	NA	NA	NA	NA	PMS2P1_exon_chr7:99918707
1	ZC3H7B	96.5369	78.8285	-0.2797	1.0	NC	No	No	1	ZC3H7B_exon_chr22:41753180	1.0	1.0	0.0	NA	4	0.8962	0.8415	-0.0547	NA	ZC3H7B_exon_chr22:41753180
1	ZNF415	37.3227	17.6787	-1.0587	1.0	NC	No	No	1	ZNF415_exon_chr19:53613161	1.0	1.0	0.0	NA	1	NA	NA	NA	NA	ZNF415_exon_chr19:53613161
1	BRD4	82.9362	174.7459	1.0993	0.7134	NC	No	No	2	BRD4_exon_chr19:15360101	0.4836	0.104	-0.3796	NA	1	NA	NA	NA	NA	BRD4_exon_chr19:15360101
2	BRD4									BRD4_exon_chr19:15367074	0.5164	0.8535	0.3371	NA	1	NA	NA	NA	NA	BRD4_exon_chr19:15367074
1	RHOB	285.2462	155.4739	-0.8699	0.4375	NC	No	No	1	RHOB_exon_chr2:20646834	1.0	1.0	0.0	NA	3	0.8305	0.78	-0.0505	NA	RHOB_exon_chr2:20646834
1	KLHDC10	2.9808	16.6039	2.4383	0.7866	NC	No	No	1	KLHDC10_exon_chr7:129770376	1.0	1.0	0.0	NA	2	NA	NA	NA	NA	KLHDC10_exon_chr7:129770376
1	EFS	120.5409	55.789	-1.0951	1.0	NC	No	No	1	EFS_exon_chr14:23826869	1.0	1.0	0.0	NA	1	NA	NA	NA	NA	EFS_exon_chr14:23826869
1	ATG10	49.4595	23.6963	-1.0485	1.0	NC	No	No	1	ATG10_exon_chr5:81549886	1.0	1.0	0.0	NA	3	NA	NA	NA	NA	ATG10_exon_chr5:81549886
1	RWDD1	277.6017	250.5424	-0.1595	1.0	NC	No	No	2	RWDD1_exon_chr6:116911434	0.1242	0.2257	0.1015	NA	1	NA	NA	NA	NA	RWDD1_exon_chr6:116911434
2	RWDD1									RWDD1_exon_chr6:116914142	0.8758	0.7743	-0.1015	NA	1	NA	NA	NA	NA	RWDD1_exon_chr6:116914142
1	SHLD2P1	0.0	5.6588	4.9629	1.0	NC	No	No	1	SHLD2P1_exon_chr10:46938167	1.0	1.0	0.0	NA	1	NA	NA	NA	NA	SHLD2P1_exon_chr10:46938167
1	FAM234B	7.3727	12.8304	0.7852	1.0	NC	No	No	1	FAM234B_exon_chr12:13233558	1.0	1.0	0.0	NA	1	NA	NA	NA	NA	FAM234B_exon_chr12:13233558
1	SERTAD3	25.1712	15.3721	-0.6963	1.0	NC	No	No	1	SERTAD3_exon_chr19:40947993	1.0	1.0	0.0	NA	1	NA	NA	NA	NA	SERTAD3_exon_chr19:40947993
1	SPATA33	9.3409	21.7716	1.2019	0.9833	NC	No	No	1	SPATA33_exon_chr16:89735693	1.0	1.0	0.0	NA	3	NA	NA	NA	NA	SPATA33_exon_chr16:89735693
1	SNORA74D	3.308	5.559	0.7215	1.0	NC	No	No	1	SNORA74D_exon_chr5:138611868	1.0	1.0	0.0	NA	1	NA	NA	NA	NA	SNORA74D_exon_chr5:138611868
1	ING1	118.8458	88.8367	-0.3999	1.0	NC	No	No	1	ING1_exon_chr13:111371575	1.0	1.0	0.0	NA	4	0.2087	0.2278	0.0191	NA	ING1_exon_chr13:111371575
1	TES	446.2555	488.5503	0.1313	0.8123	NC	No	No	1	TES_exon_chr7:115897347	1.0	1.0	0.0	NA	2	0.8678	0.6599	-0.2079	NA	TES_exon_chr7:115897347
1	YAF2	16.6363	23.0665	0.4608	1.0	NC	No	No	1	YAF2_exon_chr12:42554628	1.0	1.0	0.0	NA	3	NA	NA	NA	NA	YAF2_exon_chr12:42554628
1	SS18L2	33.7225	63.4923	0.8923	1.0	NC	No	No	1	SS18L2_exon_chr3:42635913	1.0	1.0	0.0	NA	1	NA	NA	NA	NA	SS18L2_exon_chr3:42635913
1	ICA1L	83.5215	101.4138	0.2799	1.0	NC	No	No	1	ICA1L_exon_chr2:203684622	1.0	1.0	0.0	NA	1	NA	NA	NA	NA	ICA1L_exon_chr2:203684622
1	FANCF	35.6268	23.9213	-0.5933	1.0	NC	No	No	1	FANCF_exon_chr11:22647369	1.0	1.0	0.0	NA	6	NA	NA	NA	NA	FANCF_exon_chr11:22647369
1	WNT3A	1.6259	2.0577	0.3298	1.0	NC	No	No	1	WNT3A_exon_chr1:228246686	1.0	1.0	0.0	NA	1	NA	NA	NA	NA	WNT3A_exon_chr1:228246686
1	ABHD8	81.7841	69.2492	-0.2404	1.0	NC	No	No	1	ABHD8_exon_chr19:17403640	1.0	1.0	0.0	NA	1	NA	NA	NA	NA	ABHD8_exon_chr19:17403640
1	LSAMP-AS1	3.6019	0.0	-4.3543	1.0	NC	No	No	1	LSAMP-AS1_exon_chr3:116088677	1.0	1.0	0.0	NA	1	NA	NA	NA	NA	LSAMP-AS1_exon_chr3:116088677
1	HSF2BP	11.9088	0.0	-6.1148	1.0	NC	No	No	1	HSF2BP_exon_chr21:44949842	1.0	1.0	0.0	NA	1	NA	NA	NA	NA	HSF2BP_exon_chr21:44949842
1	PGM3	203.1087	251.8279	0.3035	0.9486	NC	No	No	1	PGM3_exon_chr6:83879042	1.0	1.0	0.0	NA	11	0.2519	0.2027	-0.0492	NA	PGM3_exon_chr6:83879042
1	TTC21B	10.8808	12.6005	0.216	1.0	NC	No	No	1	TTC21B_exon_chr2:166731342	1.0	1.0	0.0	NA	2	NA	NA	NA	NA	TTC21B_exon_chr2:166731342
1	ZNF530	13.2848	16.6542	0.3495	1.0	NC	No	No	2	ZNF530_exon_chr19:58117053	0.0	0.1083	0.1083	NA	1	NA	NA	NA	NA	ZNF530_exon_chr19:58117053
2	ZNF530									ZNF530_exon_chr19:58123870	1.0	0.8917	-0.1083	NA	1	NA	NA	NA	NA	ZNF530_exon_chr19:58123870
1	HDAC6	67.6652	159.561	1.2571	0.6307	NC	No	No	2	HDAC6_exon_chrX:48664037	0.0531	0.0644	0.0113	NA	1	NA	NA	NA	NA	HDAC6_exon_chrX:48664037
2	HDAC6									HDAC6_exon_chrX:48682953	0.9469	0.9356	-0.0113	NA	2	NA	NA	NA	NA	HDAC6_exon_chrX:48682953
1	GARS-DT	0.0	6.1732	5.088	1.0	NC	No	No	1	GARS-DT_exon_chr7:30601744	1.0	1.0	0.0	NA	1	NA	NA	NA	NA	GARS-DT_exon_chr7:30601744
1	RNFT1	45.8685	42.7084	-0.0906	1.0	NC	No	No	1	RNFT1_exon_chr17:58030472	1.0	1.0	0.0	NA	1	NA	NA	NA	NA	RNFT1_exon_chr17:58030472
1	ATG14	57.6267	37.7785	-0.6281	1.0	NC	No	No	2	ATG14_exon_chr14:55836643	0.8374	0.9864	0.149	NA	1	NA	NA	NA	NA	ATG14_exon_chr14:55836643
2	ATG14									ATG14_exon_chr14:55864152	0.1626	0.0136	-0.149	NA	2	NA	NA	NA	NA	ATG14_exon_chr14:55864152
1	MEA1	250.4971	274.5145	0.14	1.0	NC	No	No	1	MEA1_exon_chr6:42980359	1.0	1.0	0.0	NA	1	NA	NA	NA	NA	MEA1_exon_chr6:42980359
1	RTN4RL2	21.827	4.2439	-2.3692	0.7433	NC	No	No	1	RTN4RL2_exon_chr11:57243634	1.0	1.0	0.0	NA	1	NA	NA	NA	NA	RTN4RL2_exon_chr11:57243634
1	MFSD11	29.1081	31.8939	0.1414	1.0	NC	No	No	1	MFSD11_exon_chr17:74774269	1.0	1.0	0.0	NA	3	NA	NA	NA	NA	MFSD11_exon_chr17:74774269
1	DNAJC14	31.2756	25.4675	-0.2975	1.0	NC	No	No	1	DNAJC14_exon_chr12:56215971	1.0	1.0	0.0	NA	1	NA	NA	NA	NA	DNAJC14_exon_chr12:56215971
1	DET1	14.1494	3.3134	-2.0896	0.9925	NC	No	No	1	DET1_exon_chr15:89056371	1.0	1.0	0.0	NA	1	NA	NA	NA	NA	DET1_exon_chr15:89056371
1	GPN2	71.5692	24.4234	-1.5446	1.0	NC	No	No	1	GPN2_exon_chr1:27206240	1.0	1.0	0.0	NA	2	NA	NA	NA	NA	GPN2_exon_chr1:27206240
1	TRIP13	73.8562	87.1861	0.2281	1.0	NC	No	No	1	TRIP13_exon_chr5:917122	1.0	1.0	0.0	NA	5	0.7842	0.7644	-0.0197	NA	TRIP13_exon_chr5:917122
1	RPLP2	8885.428	9719.7628	0.1294	0.6216	NC	No	No	1	RPLP2_exon_chr11:812759	1.0	1.0	0.0	NA	1	NA	NA	NA	NA	RPLP2_exon_chr11:812759
1	RPL37A	8526.9305	8253.9629	-0.0471	0.9098	NC	No	No	1	RPL37A_exon_chr2:217366063	1.0	1.0	0.0	NA	1	NA	NA	NA	NA	RPL37A_exon_chr2:217366063
1	SOX13	305.7207	304.6595	-0.0082	0.9424	NC	No	No	1	SOX13_exon_chr1:204094985	1.0	1.0	0.0	NA	3	0.7159	0.773	0.0572	NA	SOX13_exon_chr1:204094985
1	NAE1	244.6944	332.2441	0.4374	0.3965	NC	No	No	2	NAE1_exon_chr16:66837021	0.9189	0.7351	-0.1838	NA	1	NA	NA	NA	NA	NAE1_exon_chr16:66837021
2	NAE1									NAE1_exon_chr16:66850575	0.0762	0.1927	0.1164	NA	1	NA	NA	NA	NA	NAE1_exon_chr16:66850575
1	SHCBP1	133.3582	112.1148	-0.25	1.0	NC	No	No	1	SHCBP1_exon_chr16:46615966	1.0	1.0	0.0	NA	4	0.9235	0.9342	0.0106	NA	SHCBP1_exon_chr16:46615966
1	KIFAP3	28.5607	28.9542	0.0367	1.0	NC	No	No	2	KIFAP3_exon_chr1:169890922	0.6641	0.826	0.1619	NA	1	NA	NA	NA	NA	KIFAP3_exon_chr1:169890922
2	KIFAP3									KIFAP3_exon_chr1:170016007	0.3359	0.174	-0.1619	NA	1	NA	NA	NA	NA	KIFAP3_exon_chr1:170016007
1	NDUFA3	728.4281	847.8824	0.2156	0.7001	NC	No	No	1	NDUFA3_exon_chr19:54610117	1.0	1.0	0.0	NA	1	NA	NA	NA	NA	NDUFA3_exon_chr19:54610117
1	MIR5006	24.4734	24.3493	-0.0282	1.0	NC	No	No	1	MIR5006_exon_chr13:42142531	1.0	1.0	0.0	NA	1	NA	NA	NA	NA	MIR5006_exon_chr13:42142531
1	CAPN10-DT	0.0	4.8178	4.7215	1.0	NC	No	No	1	CAPN10-DT_exon_chr2:241525733	1.0	1.0	0.0	NA	1	NA	NA	NA	NA	CAPN10-DT_exon_chr2:241525733
1	RNF14	69.7265	85.4022	0.2828	1.0	NC	No	No	1	RNF14_exon_chr5:141367297	1.0	1.0	0.0	NA	3	0.584	0.3761	-0.2079	NA	RNF14_exon_chr5:141367297
1	NANP	38.2878	42.2458	0.1335	1.0	NC	No	No	1	NANP_exon_chr20:25597217	1.0	1.0	0.0	NA	2	0.9319	0.7693	-0.1625	NA	NANP_exon_chr20:25597217
1	ZC4H2	5.4196	9.5171	0.8051	1.0	NC	No	No	1	ZC4H2_exon_chrX:64137776	1.0	1.0	0.0	NA	2	NA	NA	NA	NA	ZC4H2_exon_chrX:64137776
1	PTER	77.2959	55.3844	-0.4812	1.0	NC	No	No	1	PTER_exon_chr10:16553044	1.0	1.0	0.0	NA	9	0.5348	0.851	0.3162	NA	PTER_exon_chr10:16553044
1	SNORA2B	3.2705	0.3706	-3.2983	1.0	NC	No	No	1	SNORA2B_exon_chr12:49061376	1.0	1.0	0.0	NA	1	NA	NA	NA	NA	SNORA2B_exon_chr12:49061376
1	KLF8	54.397	48.5062	-0.1578	1.0	NC	No	No	1	KLF8_exon_chrX:56310745	1.0	1.0	0.0	NA	4	NA	NA	NA	NA	KLF8_exon_chrX:56310745
1	FHL3	54.8632	45.2914	-0.2643	1.0	NC	No	No	1	FHL3_exon_chr1:38463231	1.0	1.0	0.0	NA	1	NA	NA	NA	NA	FHL3_exon_chr1:38463231
1	COX17	131.234	111.7002	-0.2301	1.0	NC	No	No	1	COX17_exon_chr3:119388512	1.0	1.0	0.0	NA	1	NA	NA	NA	NA	COX17_exon_chr3:119388512
1	TMEM165	171.791	121.4826	-0.5046	1.0	NC	No	No	1	TMEM165_exon_chr4:56291542	1.0	1.0	0.0	NA	4	0.7973	0.8386	0.0413	NA	TMEM165_exon_chr4:56291542
1	RACK1	17116.0183	16859.817	-0.0217	0.9334	NC	No	No	1	RACK1_exon_chr5:180664042	1.0	1.0	0.0	NA	1	NA	NA	NA	NA	RACK1_exon_chr5:180664042
1	PNPLA6	15.6733	21.2443	0.45	1.0	NC	No	No	1	PNPLA6_exon_chr19:7626373	1.0	1.0	0.0	NA	1	NA	NA	NA	NA	PNPLA6_exon_chr19:7626373
1	BUB1B-PAK6	110.7522	37.4147	-1.5596	0.8123	NC	No	No	1	BUB1B-PAK6_exon_chr15:40568127	1.0	1.0	0.0	NA	1	NA	NA	NA	NA	BUB1B-PAK6_exon_chr15:40568127
1	JHY	0.0	3.8581	4.4052	1.0	NC	No	No	1	JHY_exon_chr11:122829955	1.0	1.0	0.0	NA	1	NA	NA	NA	NA	JHY_exon_chr11:122829955
1	TADA2B	24.229	32.805	0.4623	1.0	NC	No	No	1	TADA2B_exon_chr4:7055788	1.0	1.0	0.0	NA	4	NA	NA	NA	NA	TADA2B_exon_chr4:7055788
1	MSRB1	142.2101	70.9792	-0.9961	0.7217	NC	No	No	1	MSRB1_exon_chr16:1989144	1.0	1.0	0.0	NA	2	0.979	0.9031	-0.0759	NA	MSRB1_exon_chr16:1989144
1	ECD	186.1312	198.9887	0.1009	1.0	NC	No	No	1	ECD_exon_chr10:74894571	1.0	1.0	0.0	NA	3	0.0688	0.1666	0.0978	NA	ECD_exon_chr10:74894571
1	CEBPA	969.7806	769.0386	-0.3349	0.2518	NC	No	No	1	CEBPA_exon_chr19:33793470	1.0	1.0	0.0	NA	1	NA	NA	NA	NA	CEBPA_exon_chr19:33793470
1	TMCC1-AS1	2.7098	0.0	-3.9856	1.0	NC	No	No	1	TMCC1-AS1_exon_chr3:129624469	1.0	1.0	0.0	NA	1	NA	NA	NA	NA	TMCC1-AS1_exon_chr3:129624469
1	ANKH	7.7576	24.5621	1.6345	0.8365	NC	No	No	1	ANKH_exon_chr5:14711419	1.0	1.0	0.0	NA	4	NA	NA	NA	NA	ANKH_exon_chr5:14711419
1	PRDM10	13.3146	0.643	-4.3808	0.5855	NC	No	No	1	PRDM10_exon_chr11:129772411	1.0	1.0	0.0	NA	1	NA	NA	NA	NA	PRDM10_exon_chr11:129772411
1	NKTR	49.5217	85.9601	0.771	1.0	NC	No	No	4	NKTR_exon_chr3:42672662	0.0823	0.0618	-0.0204	NA	1	NA	NA	NA	NA	NKTR_exon_chr3:42672662
2	NKTR									NKTR_exon_chr3:42674092	0.1246	0.1203	-0.0043	NA	4	NA	NA	NA	NA	NKTR_exon_chr3:42674092
3	NKTR									NKTR_exon_chr3:42678359	0.0	0.2261	0.2261	NA	1	NA	NA	NA	NA	NKTR_exon_chr3:42678359
4	NKTR									NKTR_exon_chr3:42687379	0.7931	0.5918	-0.2014	NA	1	NA	NA	NA	NA	NKTR_exon_chr3:42687379
1	VRK1	198.9116	239.4608	0.2665	1.0	NC	No	No	1	VRK1_exon_chr14:97347513	1.0	1.0	0.0	NA	3	0.4724	0.3648	-0.1077	NA	VRK1_exon_chr14:97347513
1	TTC38	21.7503	17.579	-0.3116	1.0	NC	No	No	1	TTC38_exon_chr22:46688687	1.0	1.0	0.0	NA	1	NA	NA	NA	NA	TTC38_exon_chr22:46688687
1	WDHD1	44.7724	47.6069	0.0918	1.0	NC	No	No	2	WDHD1_exon_chr14:55408408	1.0	0.6965	-0.3035	NA	1	NA	NA	NA	NA	WDHD1_exon_chr14:55408408
2	WDHD1									WDHD1_exon_chr14:55411188	0.0	0.3035	0.3035	NA	5	0.4909	0.5217	0.0308	NA	WDHD1_exon_chr14:55411188
1	ABCA10	2.4259	10.6097	2.0925	1.0	NC	No	No	1	ABCA10_exon_chr17:67243785	1.0	1.0	0.0	NA	2	NA	NA	NA	NA	ABCA10_exon_chr17:67243785
1	DDIT4	139.1812	217.8431	0.6553	0.5635	NC	No	No	1	DDIT4_exon_chr10:74034452	1.0	1.0	0.0	NA	1	NA	NA	NA	NA	DDIT4_exon_chr10:74034452
1	C1orf115	1.6259	18.998	3.4868	0.6506	NC	No	No	1	C1orf115_exon_chr1:220869953	1.0	1.0	0.0	NA	2	NA	NA	NA	NA	C1orf115_exon_chr1:220869953
1	RPARP-AS1	88.5972	62.0484	-0.5096	1.0	NC	No	No	1	RPARP-AS1_exon_chr10:104215093	1.0	1.0	0.0	NA	2	0.681	0.4057	-0.2753	NA	RPARP-AS1_exon_chr10:104215093
1	NCL	3582.3018	6858.0865	0.9372	0.0	UP	Yes	No	3	NCL_exon_chr2:232319978	0.432	0.2501	-0.1819	NA	2	0.2794	0.2204	-0.059	NA	NCL_exon_chr2:232319978
2	NCL									NCL_exon_chr2:232325275	0.3777	0.579	0.2012	Up	6	0.4873	0.4669	-0.0204	NA	NCL_exon_chr2:232325275
3	NCL									NCL_exon_chr2:232325577	0.1724	0.1498	-0.0226	NA	1	NA	NA	NA	NA	NCL_exon_chr2:232325577
1	WDR24	18.7003	32.6332	0.7959	1.0	NC	No	No	1	WDR24_exon_chr16:734902	1.0	1.0	0.0	NA	1	NA	NA	NA	NA	WDR24_exon_chr16:734902
1	DDX58	6.1821	7.3071	0.2269	1.0	NC	No	No	2	DDX58_exon_chr9:32457416	0.6931	0.9296	0.2365	NA	2	NA	NA	NA	NA	DDX58_exon_chr9:32457416
2	DDX58									DDX58_exon_chr9:32466439	0.3069	0.0704	-0.2365	NA	1	NA	NA	NA	NA	DDX58_exon_chr9:32466439
1	CLTCL1	9.2624	3.3438	-1.4686	1.0	NC	No	No	1	CLTCL1_exon_chr22:19167482	1.0	1.0	0.0	NA	1	NA	NA	NA	NA	CLTCL1_exon_chr22:19167482
1	DLGAP5	118.4184	189.3524	0.6778	0.7726	NC	No	No	3	DLGAP5_exon_chr14:55615191	0.922	0.7848	-0.1371	NA	1	NA	NA	NA	NA	DLGAP5_exon_chr14:55615191
2	DLGAP5									DLGAP5_exon_chr14:55618659	0.0138	0.0846	0.0708	NA	2	0.571	0.7494	0.1784	NA	DLGAP5_exon_chr14:55618659
3	DLGAP5									DLGAP5_exon_chr14:55625459	0.0642	0.0952	0.031	NA	1	NA	NA	NA	NA	DLGAP5_exon_chr14:55625459
1	IFNGR2	23.057	37.8068	0.747	1.0	NC	No	No	1	IFNGR2_exon_chr21:34809134	1.0	1.0	0.0	NA	1	NA	NA	NA	NA	IFNGR2_exon_chr21:34809134
1	MRPL37	164.9522	86.8791	-0.9245	0.7723	NC	No	No	2	MRPL37_exon_chr1:54683844	0.8885	0.9744	0.0859	NA	1	NA	NA	NA	NA	MRPL37_exon_chr1:54683844
2	MRPL37									MRPL37_exon_chr1:54690797	0.1115	0.0256	-0.0859	NA	1	NA	NA	NA	NA	MRPL37_exon_chr1:54690797
1	UQCRC1	1026.3262	1014.8047	-0.0132	0.9489	NC	No	No	1	UQCRC1_exon_chr3:48636625	1.0	1.0	0.0	NA	1	NA	NA	NA	NA	UQCRC1_exon_chr3:48636625
1	MYCN	1219.1093	949.2761	-0.3588	0.1785	NC	No	No	1	MYCN_exon_chr2:16085614	1.0	1.0	0.0	NA	1	NA	NA	NA	NA	MYCN_exon_chr2:16085614
1	ETFBKMT	2.2262	4.6299	1.063	1.0	NC	No	No	1	ETFBKMT_exon_chr12:31820580	1.0	1.0	0.0	NA	1	NA	NA	NA	NA	ETFBKMT_exon_chr12:31820580
1	GBAP1	71.047	142.9797	0.9897	0.931	NC	No	No	1	GBAP1_exon_chr1:155184264	1.0	1.0	0.0	NA	1	NA	NA	NA	NA	GBAP1_exon_chr1:155184264
1	FAM86DP	13.3196	12.8745	-0.0414	1.0	NC	No	No	1	FAM86DP_exon_chr3:75472212	1.0	1.0	0.0	NA	2	NA	NA	NA	NA	FAM86DP_exon_chr3:75472212
1	UBE2O	37.2353	72.2346	0.9676	1.0	NC	No	No	1	UBE2O_exon_chr17:74387694	1.0	1.0	0.0	NA	2	0.3737	0.3624	-0.0113	NA	UBE2O_exon_chr17:74387694
1	TMEM161A	4.5562	38.091	3.0094	0.8395	NC	No	No	1	TMEM161A_exon_chr19:19230992	1.0	1.0	0.0	NA	1	NA	NA	NA	NA	TMEM161A_exon_chr19:19230992
1	S1PR2	17.11	47.7925	1.4432	1.0	NC	No	No	1	S1PR2_exon_chr19:10335623	1.0	1.0	0.0	NA	1	NA	NA	NA	NA	S1PR2_exon_chr19:10335623
1	HACD3	321.0391	328.702	0.0423	0.9223	NC	No	No	1	HACD3_exon_chr15:65868640	1.0	1.0	0.0	NA	5	0.9076	0.9158	0.0082	NA	HACD3_exon_chr15:65868640
1	LOC101927151	1.3549	3.0866	1.1702	1.0	NC	No	No	1	LOC101927151_exon_chr19:28296512	1.0	1.0	0.0	NA	1	NA	NA	NA	NA	LOC101927151_exon_chr19:28296512
1	MUC15	218.8654	258.7816	0.2361	1.0	NC	No	No	2	MUC15_exon_chr11:26582772	0.8907	0.8129	-0.0778	NA	2	0.6699	0.8641	0.1942	NA	MUC15_exon_chr11:26582772
2	MUC15									MUC15_exon_chr11:26587443	0.1093	0.1871	0.0778	NA	3	0.4606	0.3736	-0.087	NA	MUC15_exon_chr11:26587443
1	MIR570	2.2262	0.0	-3.6889	1.0	NC	No	No	1	MIR570_exon_chr3:195426271	1.0	1.0	0.0	NA	1	NA	NA	NA	NA	MIR570_exon_chr3:195426271
1	LRRK1	2.7098	24.7639	3.1501	0.6459	NC	No	No	2	LRRK1_exon_chr15:101550654	0.0	0.5093	0.5093	NA	1	NA	NA	NA	NA	LRRK1_exon_chr15:101550654
2	LRRK1									LRRK1_exon_chr15:101608875	1.0	0.4907	-0.5093	NA	1	NA	NA	NA	NA	LRRK1_exon_chr15:101608875
1	SWAP70	205.7216	150.8941	-0.4441	1.0	NC	No	No	1	SWAP70_exon_chr11:9771410	1.0	1.0	0.0	NA	6	0.6927	0.4342	-0.2586	NA	SWAP70_exon_chr11:9771410
1	NPNT	6.0031	0.0	-5.1024	1.0	NC	No	No	1	NPNT_exon_chr4:106890051	1.0	1.0	0.0	NA	1	NA	NA	NA	NA	NPNT_exon_chr4:106890051
1	ZMYM1	26.0499	12.668	-1.0335	1.0	NC	No	No	1	ZMYM1_exon_chr1:35578577	1.0	1.0	0.0	NA	3	NA	NA	NA	NA	ZMYM1_exon_chr1:35578577
1	HBG2	10.365	4.4472	-1.2388	1.0	NC	No	No	1	HBG2_exon_chr11:5274635	1.0	1.0	0.0	NA	1	NA	NA	NA	NA	HBG2_exon_chr11:5274635
1	DZIP3	8.617	33.9913	2.0554	1.0	NC	No	No	1	DZIP3_exon_chr3:108367764	1.0	1.0	0.0	NA	1	NA	NA	NA	NA	DZIP3_exon_chr3:108367764
1	AARS2	36.4862	12.4803	-1.5442	1.0	NC	No	No	1	AARS2_exon_chr6:44268448	1.0	1.0	0.0	NA	4	NA	NA	NA	NA	AARS2_exon_chr6:44268448
1	ASXL2	51.1498	65.8443	0.3571	1.0	NC	No	No	1	ASXL2_exon_chr2:25967345	1.0	1.0	0.0	NA	4	0.2972	0.0146	-0.2827	NA	ASXL2_exon_chr2:25967345
1	ZHX3	60.5007	23.5099	-1.3529	1.0	NC	No	No	1	ZHX3_exon_chr20:39813841	1.0	1.0	0.0	NA	4	NA	NA	NA	NA	ZHX3_exon_chr20:39813841
1	ACTR10	117.2071	114.3615	-0.0355	1.0	NC	No	No	1	ACTR10_exon_chr14:58701087	1.0	1.0	0.0	NA	1	NA	NA	NA	NA	ACTR10_exon_chr14:58701087
1	AKR1C3	0.0	15.521	6.4118	0.3306	NC	No	No	1	AKR1C3_exon_chr10:5149652	1.0	1.0	0.0	NA	1	NA	NA	NA	NA	AKR1C3_exon_chr10:5149652
1	GALM	45.863	40.6634	-0.1807	1.0	NC	No	No	1	GALM_exon_chr2:38960629	1.0	1.0	0.0	NA	2	0.6863	0.7988	0.1125	NA	GALM_exon_chr2:38960629
1	CTSC	954.5733	893.9987	-0.1004	0.8667	NC	No	No	1	CTSC_exon_chr11:88027676	1.0	1.0	0.0	NA	1	NA	NA	NA	NA	CTSC_exon_chr11:88027676
1	AKAP9	161.5582	327.1611	1.0228	0.152	NC	No	No	6	AKAP9_exon_chr7:91624916	0.224	0.1044	-0.1196	NA	2	NA	NA	NA	NA	AKAP9_exon_chr7:91624916
2	AKAP9									AKAP9_exon_chr7:91630161	0.0492	0.0919	0.0427	NA	1	NA	NA	NA	NA	AKAP9_exon_chr7:91630161
3	AKAP9									AKAP9_exon_chr7:91671981	0.3182	0.3287	0.0105	NA	1	NA	NA	NA	NA	AKAP9_exon_chr7:91671981
4	AKAP9									AKAP9_exon_chr7:91694544	0.0662	0.1608	0.0945	NA	2	NA	NA	NA	NA	AKAP9_exon_chr7:91694544
5	AKAP9									AKAP9_exon_chr7:91708392	0.0971	0.159	0.0619	NA	1	NA	NA	NA	NA	AKAP9_exon_chr7:91708392
6	AKAP9									AKAP9_exon_chr7:91739435	0.2103	0.0312	-0.1791	NA	3	NA	NA	NA	NA	AKAP9_exon_chr7:91739435
1	TOB1	99.7398	54.3193	-0.8788	1.0	NC	No	No	1	TOB1_exon_chr17:48941524	1.0	1.0	0.0	NA	1	NA	NA	NA	NA	TOB1_exon_chr17:48941524
1	APOOL	34.8383	110.4957	1.6365	0.9037	NC	No	No	1	APOOL_exon_chrX:84342595	1.0	1.0	0.0	NA	2	NA	NA	NA	NA	APOOL_exon_chrX:84342595
1	LINC02018	0.0	3.3438	4.2069	1.0	NC	No	No	1	LINC02018_exon_chr3:75505767	1.0	1.0	0.0	NA	1	NA	NA	NA	NA	LINC02018_exon_chr3:75505767
1	POLR3E	102.6166	63.7073	-0.6819	1.0	NC	No	No	1	POLR3E_exon_chr16:22344964	1.0	1.0	0.0	NA	3	0.3534	0.2935	-0.0599	NA	POLR3E_exon_chr16:22344964
1	NANS	351.1473	345.5702	-0.018	0.9388	NC	No	No	1	NANS_exon_chr9:100845127	1.0	1.0	0.0	NA	1	NA	NA	NA	NA	NANS_exon_chr9:100845127
1	ZNF23	14.3784	23.7774	0.7145	1.0	NC	No	No	1	ZNF23_exon_chr16:71483788	1.0	1.0	0.0	NA	1	NA	NA	NA	NA	ZNF23_exon_chr16:71483788
1	PPP1R3D	37.0912	65.0068	0.8235	1.0	NC	No	No	1	PPP1R3D_exon_chr20:58515360	1.0	1.0	0.0	NA	1	NA	NA	NA	NA	PPP1R3D_exon_chr20:58515360
1	SWI5	47.4262	99.9067	1.0676	1.0	NC	No	No	1	SWI5_exon_chr9:131050930	1.0	1.0	0.0	NA	1	NA	NA	NA	NA	SWI5_exon_chr9:131050930
1	PEX11B	16.8084	11.4456	-0.5501	1.0	NC	No	No	1	PEX11B_exon_chr1:145522513	1.0	1.0	0.0	NA	1	NA	NA	NA	NA	PEX11B_exon_chr1:145522513
1	ABCA12	2.1174	3.6011	0.752	1.0	NC	No	No	1	ABCA12_exon_chr2:215797465	1.0	1.0	0.0	NA	2	NA	NA	NA	NA	ABCA12_exon_chr2:215797465
1	PSMC2	513.3677	398.2257	-0.3662	0.6417	NC	No	No	1	PSMC2_exon_chr7:103008343	1.0	1.0	0.0	NA	1	NA	NA	NA	NA	PSMC2_exon_chr7:103008343
1	COMMD1	26.2934	0.2572	-6.2898	0.0616	DOWN	No	No	1	COMMD1_exon_chr2:62362965	1.0	1.0	0.0	NA	1	NA	NA	NA	NA	COMMD1_exon_chr2:62362965
1	CGGBP1	149.3256	133.676	-0.1645	1.0	NC	No	No	1	CGGBP1_exon_chr3:88105149	1.0	1.0	0.0	NA	6	0.623	0.489	-0.1341	NA	CGGBP1_exon_chr3:88105149
1	BECN1	70.5493	66.237	-0.0773	1.0	NC	No	No	1	BECN1_exon_chr17:40962946	1.0	1.0	0.0	NA	2	0.8757	0.8867	0.011	NA	BECN1_exon_chr17:40962946
1	SH3BGRL	15.4256	18.5378	0.2524	1.0	NC	No	No	1	SH3BGRL_exon_chrX:80552693	1.0	1.0	0.0	NA	2	NA	NA	NA	NA	SH3BGRL_exon_chrX:80552693
1	GCH1	22.7989	11.9369	-0.9288	0.9388	NC	No	No	1	GCH1_exon_chr14:55310861	1.0	1.0	0.0	NA	2	NA	NA	NA	NA	GCH1_exon_chr14:55310861
1	TMEM14C	841.246	969.1458	0.2006	0.6932	NC	No	No	1	TMEM14C_exon_chr6:10730847	1.0	1.0	0.0	NA	1	NA	NA	NA	NA	TMEM14C_exon_chr6:10730847
1	BRF2	16.6711	32.9764	0.9615	1.0	NC	No	No	1	BRF2_exon_chr8:37702731	1.0	1.0	0.0	NA	3	NA	NA	NA	NA	BRF2_exon_chr8:37702731
1	PSTK	13.3611	4.4472	-1.5838	0.972	NC	No	No	1	PSTK_exon_chr10:124749689	1.0	1.0	0.0	NA	1	NA	NA	NA	NA	PSTK_exon_chr10:124749689
1	UBE2D2	1094.9316	1240.4167	0.1794	0.646	NC	No	No	1	UBE2D2_exon_chr5:139006340	1.0	1.0	0.0	NA	6	0.2484	0.2218	-0.0266	NA	UBE2D2_exon_chr5:139006340
1	MZF1	14.8288	15.726	0.0862	1.0	NC	No	No	1	MZF1_exon_chr19:59074871	1.0	1.0	0.0	NA	1	NA	NA	NA	NA	MZF1_exon_chr19:59074871
1	VAV2	215.954	169.7902	-0.3496	0.876	NC	No	No	1	VAV2_exon_chr9:136629231	1.0	1.0	0.0	NA	3	0.4065	0.3633	-0.0432	NA	VAV2_exon_chr9:136629231
1	TNKS1BP1	106.8285	89.4046	-0.2695	1.0	NC	No	No	1	TNKS1BP1_exon_chr11:57067555	1.0	1.0	0.0	NA	1	NA	NA	NA	NA	TNKS1BP1_exon_chr11:57067555
1	QPCTL	14.8115	10.292	-0.5246	1.0	NC	No	No	1	QPCTL_exon_chr19:46206161	1.0	1.0	0.0	NA	1	NA	NA	NA	NA	QPCTL_exon_chr19:46206161
1	FAM160B2	5.5846	1.5433	-1.8399	1.0	NC	No	No	1	FAM160B2_exon_chr8:21960303	1.0	1.0	0.0	NA	1	NA	NA	NA	NA	FAM160B2_exon_chr8:21960303
1	DNAJC9	373.9756	345.8469	-0.1119	0.9037	NC	No	No	1	DNAJC9_exon_chr10:75003277	1.0	1.0	0.0	NA	4	0.1139	0.1407	0.0268	NA	DNAJC9_exon_chr10:75003277
1	HSPD1	3027.6004	2937.5184	-0.0436	0.9037	NC	No	No	2	HSPD1_exon_chr2:198351922	0.9482	0.8959	-0.0523	NA	1	NA	NA	NA	NA	HSPD1_exon_chr2:198351922
2	HSPD1									HSPD1_exon_chr2:198353971	0.0323	0.081	0.0487	NA	3	0.9142	0.89	-0.0242	NA	HSPD1_exon_chr2:198353971
1	ELMSAN1	22.6009	18.0639	-0.3398	1.0	NC	No	No	1	ELMSAN1_exon_chr14:74186204	1.0	1.0	0.0	NA	1	NA	NA	NA	NA	ELMSAN1_exon_chr14:74186204
1	BCL9L	90.7597	76.3787	-0.2517	1.0	NC	No	No	1	BCL9L_exon_chr11:118770217	1.0	1.0	0.0	NA	4	0.9744	0.8027	-0.1717	NA	BCL9L_exon_chr11:118770217
1	LCA5	13.0071	0.0	-6.2393	1.0	NC	No	No	2	LCA5_exon_chr6:80197583	0.7083	nan	nan	NA	1	NA	NA	NA	NA	LCA5_exon_chr6:80197583
2	LCA5									LCA5_exon_chr6:80198933	0.2917	nan	nan	NA	1	NA	NA	NA	NA	LCA5_exon_chr6:80198933
1	DNAJC21	177.7578	259.5583	0.5507	0.7804	NC	No	No	2	DNAJC21_exon_chr5:34937430	0.1151	0.2205	0.1054	NA	1	NA	NA	NA	NA	DNAJC21_exon_chr5:34937430
2	DNAJC21									DNAJC21_exon_chr5:34954657	0.8642	0.6846	-0.1797	NA	8	0.0913	0.2094	0.1182	NA	DNAJC21_exon_chr5:34954657
1	EIF2S1	839.8286	734.9799	-0.191	0.7358	NC	No	No	1	EIF2S1_exon_chr14:67850031	1.0	1.0	0.0	NA	6	0.1118	0.0756	-0.0362	NA	EIF2S1_exon_chr14:67850031
1	LINC01089	5.8576	16.247	1.4965	0.9658	NC	No	No	1	LINC01089_exon_chr12:122234148	1.0	1.0	0.0	NA	1	NA	NA	NA	NA	LINC01089_exon_chr12:122234148
1	KIF11	171.0361	174.3693	0.0182	1.0	NC	No	No	1	KIF11_exon_chr10:94413421	1.0	1.0	0.0	NA	4	0.4715	0.5651	0.0936	NA	KIF11_exon_chr10:94413421
1	MFSD10	99.2599	84.5989	-0.2358	1.0	NC	No	No	1	MFSD10_exon_chr4:2932680	1.0	1.0	0.0	NA	1	NA	NA	NA	NA	MFSD10_exon_chr4:2932680
1	TFRC	885.6928	707.4851	-0.3257	0.4615	NC	No	No	1	TFRC_exon_chr3:195779055	1.0	1.0	0.0	NA	1	NA	NA	NA	NA	TFRC_exon_chr3:195779055
1	CLN8	33.2538	58.6731	0.8169	1.0	NC	No	No	1	CLN8_exon_chr8:1728415	1.0	1.0	0.0	NA	4	0.8159	0.4608	-0.3551	NA	CLN8_exon_chr8:1728415
1	LOC103611081	1.7643	0.0	-3.3846	1.0	NC	No	No	1	LOC103611081_exon_chr11:130740142	1.0	1.0	0.0	NA	1	NA	NA	NA	NA	LOC103611081_exon_chr11:130740142
1	CCNB1	1281.0732	1260.8557	-0.0239	0.9388	NC	No	No	1	CCNB1_exon_chr5:68473350	1.0	1.0	0.0	NA	1	NA	NA	NA	NA	CCNB1_exon_chr5:68473350
1	LONRF1	8.7355	3.8581	-1.1905	1.0	NC	No	No	1	LONRF1_exon_chr8:12580763	1.0	1.0	0.0	NA	2	NA	NA	NA	NA	LONRF1_exon_chr8:12580763
1	BAP1	91.7676	85.4239	-0.0932	1.0	NC	No	No	1	BAP1_exon_chr3:52436437	1.0	1.0	0.0	NA	2	0.9228	1.0	0.0772	NA	BAP1_exon_chr3:52436437
1	WDR83OS	229.4058	202.3797	-0.1726	1.0	NC	No	No	1	WDR83OS_exon_chr19:12779239	1.0	1.0	0.0	NA	1	NA	NA	NA	NA	WDR83OS_exon_chr19:12779239
1	KRBOX1	8.6772	3.2525	-1.4343	1.0	NC	No	No	1	KRBOX1_exon_chr3:42984029	1.0	1.0	0.0	NA	1	NA	NA	NA	NA	KRBOX1_exon_chr3:42984029
1	GNPAT	17.3752	43.2173	1.2838	1.0	NC	No	No	1	GNPAT_exon_chr1:231413244	1.0	1.0	0.0	NA	2	NA	NA	NA	NA	GNPAT_exon_chr1:231413244
1	ELF3-AS1	0.0	2.5078	3.7846	1.0	NC	No	No	1	ELF3-AS1_exon_chr1:201969455	1.0	1.0	0.0	NA	1	NA	NA	NA	NA	ELF3-AS1_exon_chr1:201969455
1	GATA6	174.6788	210.3683	0.255	1.0	NC	No	No	2	GATA6_exon_chr18:19762717	0.0339	0.0973	0.0634	NA	1	NA	NA	NA	NA	GATA6_exon_chr18:19762717
2	GATA6									GATA6_exon_chr18:19780618	0.9661	0.9027	-0.0634	NA	7	0.6838	0.729	0.0451	NA	GATA6_exon_chr18:19780618
1	LOC101926943	4.2022	0.0	-4.5807	1.0	NC	No	No	1	LOC101926943_exon_chr7:74103605	1.0	1.0	0.0	NA	1	NA	NA	NA	NA	LOC101926943_exon_chr7:74103605
1	ADAT2	10.6173	8.4882	-0.3287	1.0	NC	No	No	1	ADAT2_exon_chr6:143749643	1.0	1.0	0.0	NA	4	NA	NA	NA	NA	ADAT2_exon_chr6:143749643
1	SET	2507.9923	2271.5605	-0.1429	0.684	NC	No	No	1	SET_exon_chr9:131456919	1.0	1.0	0.0	NA	7	0.3921	0.3954	0.0034	NA	SET_exon_chr9:131456919
1	WDR36	114.0558	99.5482	-0.1936	1.0	NC	No	No	1	WDR36_exon_chr5:110462431	1.0	1.0	0.0	NA	9	0.6235	0.3927	-0.2308	NA	WDR36_exon_chr5:110462431
1	TMEM44-AS1	8.5171	0.0	-5.6273	1.0	NC	No	No	1	TMEM44-AS1_exon_chr3:194310583	1.0	1.0	0.0	NA	1	NA	NA	NA	NA	TMEM44-AS1_exon_chr3:194310583
1	INPP4A	62.0132	64.6135	0.0843	1.0	NC	No	No	1	INPP4A_exon_chr2:99203938	1.0	1.0	0.0	NA	4	0.5249	0.8137	0.2888	NA	INPP4A_exon_chr2:99203938
1	PPP6R2	42.7724	58.8579	0.4647	1.0	NC	No	No	1	PPP6R2_exon_chr22:50882627	1.0	1.0	0.0	NA	2	NA	NA	NA	NA	PPP6R2_exon_chr22:50882627
1	IER2	71.9285	64.7757	-0.1477	1.0	NC	No	No	1	IER2_exon_chr19:13263757	1.0	1.0	0.0	NA	1	NA	NA	NA	NA	IER2_exon_chr19:13263757
1	KLF6	50.2667	29.8207	-0.7424	1.0	NC	No	No	1	KLF6_exon_chr10:3821782	1.0	1.0	0.0	NA	1	NA	NA	NA	NA	KLF6_exon_chr10:3821782
1	C4orf48	83.752	63.4788	-0.403	1.0	NC	No	No	1	C4orf48_exon_chr4:2045587	1.0	1.0	0.0	NA	1	NA	NA	NA	NA	C4orf48_exon_chr4:2045587
1	MLYCD	32.707	29.519	-0.1656	1.0	NC	No	No	1	MLYCD_exon_chr16:83948560	1.0	1.0	0.0	NA	2	0.6061	0.8403	0.2343	NA	MLYCD_exon_chr16:83948560
1	MIR3658	222.6889	188.9533	-0.2229	1.0	NC	No	No	1	MIR3658_exon_chr1:165876920	1.0	1.0	0.0	NA	5	0.0875	0.0591	-0.0284	NA	MIR3658_exon_chr1:165876920
1	ZNF346	47.6572	15.3469	-1.6458	0.7866	NC	No	No	1	ZNF346_exon_chr5:176491512	1.0	1.0	0.0	NA	1	NA	NA	NA	NA	ZNF346_exon_chr5:176491512
1	WDR55	208.4362	279.6994	0.436	0.9388	NC	No	No	1	WDR55_exon_chr5:140048917	1.0	1.0	0.0	NA	1	NA	NA	NA	NA	WDR55_exon_chr5:140048917
1	MFSD1	92.8652	91.4419	-0.0259	1.0	NC	No	No	1	MFSD1_exon_chr3:158546767	1.0	1.0	0.0	NA	3	0.7981	0.6847	-0.1134	NA	MFSD1_exon_chr3:158546767
1	E2F6	17.8848	23.7613	0.4006	1.0	NC	No	No	1	E2F6_exon_chr2:11586649	1.0	1.0	0.0	NA	1	NA	NA	NA	NA	E2F6_exon_chr2:11586649
1	RAB11FIP1	318.2577	248.4287	-0.3531	0.9603	NC	No	No	1	RAB11FIP1_exon_chr8:37720631	1.0	1.0	0.0	NA	7	0.5463	0.6042	0.0579	NA	RAB11FIP1_exon_chr8:37720631
1	SERTAD4-AS1	8.4004	0.0	-5.6094	1.0	NC	No	No	1	SERTAD4-AS1_exon_chr1:210405116	1.0	1.0	0.0	NA	1	NA	NA	NA	NA	SERTAD4-AS1_exon_chr1:210405116
1	KHK	0.0	14.0164	6.2653	0.322	NC	No	No	1	KHK_exon_chr2:27322532	1.0	1.0	0.0	NA	1	NA	NA	NA	NA	KHK_exon_chr2:27322532
1	BCAT2	0.8713	3.222	2.0089	1.0	NC	No	No	1	BCAT2_exon_chr19:49298721	1.0	1.0	0.0	NA	1	NA	NA	NA	NA	BCAT2_exon_chr19:49298721
1	RASGEF1B	17.6968	8.3139	-1.0706	1.0	NC	No	No	1	RASGEF1B_exon_chr4:82348946	1.0	1.0	0.0	NA	2	NA	NA	NA	NA	RASGEF1B_exon_chr4:82348946
1	LSM4	711.2587	972.4508	0.4511	0.2767	NC	No	No	1	LSM4_exon_chr19:18418365	1.0	1.0	0.0	NA	1	NA	NA	NA	NA	LSM4_exon_chr19:18418365
1	DIP2A	20.1216	48.9636	1.2768	1.0	NC	No	No	3	DIP2A_exon_chr21:47965793	0.1755	0.1452	-0.0302	NA	2	NA	NA	NA	NA	DIP2A_exon_chr21:47965793
2	DIP2A									DIP2A_exon_chr21:47966827	0.6744	0.7338	0.0595	NA	1	NA	NA	NA	NA	DIP2A_exon_chr21:47966827
3	DIP2A									DIP2A_exon_chr21:47987282	0.1502	0.1209	-0.0292	NA	1	NA	NA	NA	NA	DIP2A_exon_chr21:47987282
1	TXN	1548.7294	1645.3933	0.0853	0.8588	NC	No	No	1	TXN_exon_chr9:113006499	1.0	1.0	0.0	NA	1	NA	NA	NA	NA	TXN_exon_chr9:113006499
1	PEX7	23.1748	16.0115	-0.5205	1.0	NC	No	No	1	PEX7_exon_chr6:137234595	1.0	1.0	0.0	NA	2	NA	NA	NA	NA	PEX7_exon_chr6:137234595
1	CLK2	66.5616	77.3424	0.218	1.0	NC	No	No	1	CLK2_exon_chr1:155233191	1.0	1.0	0.0	NA	1	NA	NA	NA	NA	CLK2_exon_chr1:155233191
1	TM7SF3	503.7158	441.136	-0.1981	0.7433	NC	No	No	1	TM7SF3_exon_chr12:27127160	1.0	1.0	0.0	NA	2	0.1547	0.1835	0.0288	NA	TM7SF3_exon_chr12:27127160
1	FAM133B	295.7427	365.7309	0.3038	0.5673	NC	No	No	4	FAM133B_exon_chr7:92191682	0.4142	0.1843	-0.2299	NA	1	NA	NA	NA	NA	FAM133B_exon_chr7:92191682
2	FAM133B									FAM133B_exon_chr7:92195375	0.2953	0.3528	0.0575	NA	2	0.3924	0.3334	-0.059	NA	FAM133B_exon_chr7:92195375
3	FAM133B									FAM133B_exon_chr7:92207707	0.1058	0.1756	0.0698	NA	2	NA	NA	NA	NA	FAM133B_exon_chr7:92207707
4	FAM133B									FAM133B_exon_chr7:92208709	0.1354	0.2481	0.1127	NA	4	0.33	0.3285	-0.0015	NA	FAM133B_exon_chr7:92208709
1	ZNF581	18.3226	48.8593	1.4119	0.8395	NC	No	No	1	ZNF581_exon_chr19:56155918	1.0	1.0	0.0	NA	1	NA	NA	NA	NA	ZNF581_exon_chr19:56155918
1	CYP51A1	77.4889	192.0196	1.3264	0.191	NC	No	No	2	CYP51A1_exon_chr7:91743157	0.9395	0.8107	-0.1287	NA	2	0.8998	0.8833	-0.0165	NA	CYP51A1_exon_chr7:91743157
2	CYP51A1									CYP51A1_exon_chr7:91752629	0.0605	0.1893	0.1287	NA	1	NA	NA	NA	NA	CYP51A1_exon_chr7:91752629
1	LINC02604	2.6464	0.0	-3.9596	1.0	NC	No	No	1	LINC02604_exon_chr7:66369106	1.0	1.0	0.0	NA	1	NA	NA	NA	NA	LINC02604_exon_chr7:66369106
1	TNFAIP3	34.9632	13.8948	-1.3412	1.0	NC	No	No	1	TNFAIP3_exon_chr6:138202171	1.0	1.0	0.0	NA	2	NA	NA	NA	NA	TNFAIP3_exon_chr6:138202171
1	TBC1D1	83.3687	78.3063	-0.0889	1.0	NC	No	No	1	TBC1D1_exon_chr4:38138755	1.0	1.0	0.0	NA	2	0.2084	0.2886	0.0801	NA	TBC1D1_exon_chr4:38138755
1	KLC2	27.0848	16.4838	-0.7124	1.0	NC	No	No	1	KLC2_exon_chr11:66034343	1.0	1.0	0.0	NA	1	NA	NA	NA	NA	KLC2_exon_chr11:66034343
1	PRPF19	909.7995	1134.6725	0.3248	0.4906	NC	No	No	1	PRPF19_exon_chr11:60658735	1.0	1.0	0.0	NA	1	NA	NA	NA	NA	PRPF19_exon_chr11:60658735
1	RRP9	40.7505	22.7467	-0.8189	1.0	NC	No	No	1	RRP9_exon_chr3:51967615	1.0	1.0	0.0	NA	1	NA	NA	NA	NA	RRP9_exon_chr3:51967615
1	C11orf98	362.6588	428.672	0.2483	0.7217	NC	No	No	1	C11orf98_exon_chr11:62430631	1.0	1.0	0.0	NA	1	NA	NA	NA	NA	C11orf98_exon_chr11:62430631
1	SPEN	87.742	80.6902	-0.1336	1.0	NC	No	No	2	SPEN_exon_chr1:16254585	0.3011	0.5175	0.2164	NA	4	NA	NA	NA	NA	SPEN_exon_chr1:16254585
2	SPEN									SPEN_exon_chr1:16265790	0.6989	0.4825	-0.2164	NA	3	NA	NA	NA	NA	SPEN_exon_chr1:16265790
1	EXOSC2	45.016	33.9266	-0.4089	1.0	NC	No	No	1	EXOSC2_exon_chr9:133579080	1.0	1.0	0.0	NA	7	0.5891	0.3107	-0.2784	NA	EXOSC2_exon_chr9:133579080
1	PPFIA4	1.8969	4.5504	1.2398	1.0	NC	No	No	1	PPFIA4_exon_chr1:203045468	1.0	1.0	0.0	NA	1	NA	NA	NA	NA	PPFIA4_exon_chr1:203045468
1	RAP1GAP2	4.9526	4.6941	-0.0971	1.0	NC	No	No	1	RAP1GAP2_exon_chr17:2936685	1.0	1.0	0.0	NA	1	NA	NA	NA	NA	RAP1GAP2_exon_chr17:2936685
1	MBP	5.0723	3.4793	-0.5685	1.0	NC	No	No	1	MBP_exon_chr18:74729224	1.0	1.0	0.0	NA	1	NA	NA	NA	NA	MBP_exon_chr18:74729224
1	GTF2IP1	630.7249	634.2617	0.002	0.9777	NC	No	No	2	GTF2IP1_exon_chr7:72620191	0.5051	0.5037	-0.0014	NA	1	NA	NA	NA	NA	GTF2IP1_exon_chr7:72620191
2	GTF2IP1									GTF2IP1_exon_chr7:74602248	0.4949	0.4963	0.0014	NA	1	NA	NA	NA	NA	GTF2IP1_exon_chr7:74602248
1	PEAK1	14.9899	8.5017	-0.8091	1.0	NC	No	No	1	PEAK1_exon_chr15:77407661	1.0	1.0	0.0	NA	2	NA	NA	NA	NA	PEAK1_exon_chr15:77407661
1	TBC1D14	54.2612	53.902	-0.01	1.0	NC	No	No	1	TBC1D14_exon_chr4:7032053	1.0	1.0	0.0	NA	2	0.9983	0.8884	-0.11	NA	TBC1D14_exon_chr4:7032053
1	PRDM2	87.4662	63.973	-0.4539	1.0	NC	No	No	2	PRDM2_exon_chr1:14113009	0.771	0.8171	0.0461	NA	3	NA	NA	NA	NA	PRDM2_exon_chr1:14113009
2	PRDM2									PRDM2_exon_chr1:14149653	0.1841	0.1689	-0.0153	NA	1	NA	NA	NA	NA	PRDM2_exon_chr1:14149653
1	NSUN2	143.9948	200.787	0.4762	0.9624	NC	No	No	1	NSUN2_exon_chr5:6600345	1.0	1.0	0.0	NA	1	NA	NA	NA	NA	NSUN2_exon_chr5:6600345
1	TRERF1	53.9776	25.6857	-1.083	1.0	NC	No	No	1	TRERF1_exon_chr6:42196407	1.0	1.0	0.0	NA	5	0.759	0.4352	-0.3238	NA	TRERF1_exon_chr6:42196407
1	PKP3	412.6665	466.109	0.1736	0.7726	NC	No	No	1	PKP3_exon_chr11:404533	1.0	1.0	0.0	NA	1	NA	NA	NA	NA	PKP3_exon_chr11:404533
1	EPOR	1.3549	0.0	-2.9976	1.0	NC	No	No	1	EPOR_exon_chr19:11489271	1.0	1.0	0.0	NA	1	NA	NA	NA	NA	EPOR_exon_chr19:11489271
1	FUOM	39.3434	16.4976	-1.2384	1.0	NC	No	No	1	FUOM_exon_chr10:135169009	1.0	1.0	0.0	NA	1	NA	NA	NA	NA	FUOM_exon_chr10:135169009
1	MAL2	186.2426	220.0314	0.2269	1.0	NC	No	No	1	MAL2_exon_chr8:120255656	1.0	1.0	0.0	NA	3	0.96	0.8848	-0.0752	NA	MAL2_exon_chr8:120255656
1	SULF2	21.8077	12.4746	-0.795	1.0	NC	No	No	1	SULF2_exon_chr20:46287136	1.0	1.0	0.0	NA	2	NA	NA	NA	NA	SULF2_exon_chr20:46287136
1	CUTC	60.8861	69.6152	0.1976	1.0	NC	No	No	1	CUTC_exon_chr10:101515381	1.0	1.0	0.0	NA	1	NA	NA	NA	NA	CUTC_exon_chr10:101515381
1	TPM3P9	91.4671	94.9733	0.0555	1.0	NC	No	No	1	TPM3P9_exon_chr19:53945048	1.0	1.0	0.0	NA	3	0.2343	0.1431	-0.0912	NA	TPM3P9_exon_chr19:53945048
1	DHX57	19.4234	55.0983	1.5606	1.0	NC	No	No	1	DHX57_exon_chr2:39025584	1.0	1.0	0.0	NA	1	NA	NA	NA	NA	DHX57_exon_chr2:39025584
1	BTG1	300.6423	253.1643	-0.246	1.0	NC	No	No	1	BTG1_exon_chr12:92538223	1.0	1.0	0.0	NA	1	NA	NA	NA	NA	BTG1_exon_chr12:92538223
1	DDX1	740.6604	734.0702	-0.0151	0.9378	NC	No	No	2	DDX1_exon_chr2:15768920	0.0378	0.0987	0.061	NA	1	NA	NA	NA	NA	DDX1_exon_chr2:15768920
2	DDX1									DDX1_exon_chr2:15770899	0.9489	0.8405	-0.1084	NA	1	NA	NA	NA	NA	DDX1_exon_chr2:15770899
1	MORN3	22.5126	10.2883	-1.1262	0.9332	NC	No	No	1	MORN3_exon_chr12:122089550	1.0	1.0	0.0	NA	2	NA	NA	NA	NA	MORN3_exon_chr12:122089550
1	HSD17B7P2	104.6402	97.9784	-0.0913	1.0	NC	No	No	1	HSD17B7P2_exon_chr10:38666912	1.0	1.0	0.0	NA	1	NA	NA	NA	NA	HSD17B7P2_exon_chr10:38666912
1	ULK3	4.8777	4.9921	0.0172	1.0	NC	No	No	1	ULK3_exon_chr15:75129585	1.0	1.0	0.0	NA	1	NA	NA	NA	NA	ULK3_exon_chr15:75129585
1	OSGEPL1	38.2449	49.9759	0.363	1.0	NC	No	No	2	OSGEPL1_exon_chr2:190612057	1.0	0.8716	-0.1284	NA	3	0.9439	0.6517	-0.2923	NA	OSGEPL1_exon_chr2:190612057
2	OSGEPL1									OSGEPL1_exon_chr2:190620286	0.0	0.1284	0.1284	NA	1	NA	NA	NA	NA	OSGEPL1_exon_chr2:190620286
1	ADGRF4	9.2249	0.0	-5.7487	1.0	NC	No	No	1	ADGRF4_exon_chr6:47688944	1.0	1.0	0.0	NA	1	NA	NA	NA	NA	ADGRF4_exon_chr6:47688944
1	LRBA	68.0037	81.1089	0.2587	1.0	NC	No	No	1	LRBA_exon_chr4:151186964	1.0	1.0	0.0	NA	2	0.242	0.2344	-0.0076	NA	LRBA_exon_chr4:151186964
1	DNMT3L	365.098	392.7039	0.1039	0.8588	NC	No	No	1	DNMT3L_exon_chr21:45666448	1.0	1.0	0.0	NA	1	NA	NA	NA	NA	DNMT3L_exon_chr21:45666448
1	GNA11	84.5124	107.8635	0.3517	1.0	NC	No	No	1	GNA11_exon_chr19:3120986	1.0	1.0	0.0	NA	1	NA	NA	NA	NA	GNA11_exon_chr19:3120986
1	ACOT7	97.8383	94.0606	-0.0725	1.0	NC	No	No	1	ACOT7_exon_chr1:6324755	1.0	1.0	0.0	NA	1	NA	NA	NA	NA	ACOT7_exon_chr1:6324755
1	MFSD12	7.4815	24.5521	1.6852	0.7466	NC	No	No	1	MFSD12_exon_chr19:3544730	1.0	1.0	0.0	NA	1	NA	NA	NA	NA	MFSD12_exon_chr19:3544730
1	PTPRG	33.851	0.0	-7.6142	0.4174	NC	No	No	1	PTPRG_exon_chr3:62278835	1.0	1.0	0.0	NA	2	NA	NA	NA	NA	PTPRG_exon_chr3:62278835
1	LYPD3	10.2022	1.0289	-3.2778	1.0	NC	No	No	1	LYPD3_exon_chr19:43965999	1.0	1.0	0.0	NA	1	NA	NA	NA	NA	LYPD3_exon_chr19:43965999
1	IFNAR2	16.4333	15.4767	-0.1087	1.0	NC	No	No	2	IFNAR2_exon_chr21:34624966	0.3621	0.0	-0.3621	NA	1	NA	NA	NA	NA	IFNAR2_exon_chr21:34624966
2	IFNAR2									IFNAR2_exon_chr21:34634865	0.6379	1.0	0.3621	NA	1	NA	NA	NA	NA	IFNAR2_exon_chr21:34634865
1	EIF2A	329.5231	524.4656	0.673	0.6219	NC	No	No	2	EIF2A_exon_chr3:150293435	0.3659	0.4516	0.0857	NA	3	0.6908	0.7276	0.0368	NA	EIF2A_exon_chr3:150293435
2	EIF2A									EIF2A_exon_chr3:150301632	0.6102	0.5072	-0.1029	NA	1	NA	NA	NA	NA	EIF2A_exon_chr3:150301632
1	USP20	12.5145	8.7301	-0.4987	1.0	NC	No	No	1	USP20_exon_chr9:132642391	1.0	1.0	0.0	NA	1	NA	NA	NA	NA	USP20_exon_chr9:132642391
1	HMBOX1	0.0	16.6644	6.5156	0.2503	NC	No	No	1	HMBOX1_exon_chr8:28908534	1.0	1.0	0.0	NA	2	NA	NA	NA	NA	HMBOX1_exon_chr8:28908534
1	PCMTD2	31.5035	26.8689	-0.2419	1.0	NC	No	No	1	PCMTD2_exon_chr20:62904573	1.0	1.0	0.0	NA	5	0.2775	0.4551	0.1776	NA	PCMTD2_exon_chr20:62904573
1	PEX1	46.4828	41.5179	-0.1351	1.0	NC	No	No	2	PEX1_exon_chr7:92116855	1.0	0.8141	-0.1859	NA	2	NA	NA	NA	NA	PEX1_exon_chr7:92116855
2	PEX1									PEX1_exon_chr7:92147356	0.0	0.1859	0.1859	NA	1	NA	NA	NA	NA	PEX1_exon_chr7:92147356
1	MTERF2	4.3357	1.6075	-1.4424	1.0	NC	No	No	1	MTERF2_exon_chr12:107372549	1.0	1.0	0.0	NA	1	NA	NA	NA	NA	MTERF2_exon_chr12:107372549
1	WBP4	88.3291	172.5665	0.9603	0.5035	NC	No	No	4	WBP4_exon_chr13:41642696	0.3762	0.2563	-0.1199	NA	1	NA	NA	NA	NA	WBP4_exon_chr13:41642696
2	WBP4									WBP4_exon_chr13:41650179	0.1236	0.2558	0.1322	NA	1	NA	NA	NA	NA	WBP4_exon_chr13:41650179
3	WBP4									WBP4_exon_chr13:41654781	0.0897	0.1738	0.084	NA	2	0.1934	0.4427	0.2493	NA	WBP4_exon_chr13:41654781
4	WBP4									WBP4_exon_chr13:41656839	0.4105	0.3141	-0.0964	NA	1	NA	NA	NA	NA	WBP4_exon_chr13:41656839
1	SYNM	6.099	0.2572	-4.1667	1.0	NC	No	No	1	SYNM_exon_chr15:99669571	1.0	1.0	0.0	NA	1	NA	NA	NA	NA	SYNM_exon_chr15:99669571
1	PSMD12	589.5304	572.1996	-0.0379	0.9308	NC	No	No	1	PSMD12_exon_chr17:65337168	1.0	1.0	0.0	NA	9	0.1049	0.1857	0.0807	NA	PSMD12_exon_chr17:65337168
1	TBC1D8B	7.4981	0.0	-5.4488	1.0	NC	No	No	1	TBC1D8B_exon_chrX:106092474	1.0	1.0	0.0	NA	1	NA	NA	NA	NA	TBC1D8B_exon_chrX:106092474
1	WDFY3-AS2	9.4829	0.0	-5.7868	1.0	NC	No	No	1	WDFY3-AS2_exon_chr4:85927159	1.0	1.0	0.0	NA	1	NA	NA	NA	NA	WDFY3-AS2_exon_chr4:85927159
1	TRIM9	8.4192	15.4772	0.8635	1.0	NC	No	No	1	TRIM9_exon_chr14:51464906	1.0	1.0	0.0	NA	1	NA	NA	NA	NA	TRIM9_exon_chr14:51464906
1	UBAP1	87.4993	113.7452	0.3639	1.0	NC	No	No	1	UBAP1_exon_chr9:34251389	1.0	1.0	0.0	NA	2	0.5345	0.507	-0.0275	NA	UBAP1_exon_chr9:34251389
1	BROX	121.5938	51.2405	-1.2534	1.0	NC	No	No	1	BROX_exon_chr1:222905969	1.0	1.0	0.0	NA	2	0.883	0.8808	-0.0022	NA	BROX_exon_chr1:222905969
1	GRIN2D	20.841	18.7156	-0.1694	1.0	NC	No	No	1	GRIN2D_exon_chr19:48945856	1.0	1.0	0.0	NA	1	NA	NA	NA	NA	GRIN2D_exon_chr19:48945856
1	DENND1A	38.4351	49.2963	0.3442	1.0	NC	No	No	2	DENND1A_exon_chr9:126144904	0.2955	0.297	0.0015	NA	2	NA	NA	NA	NA	DENND1A_exon_chr9:126144904
2	DENND1A									DENND1A_exon_chr9:126164191	0.7045	0.703	-0.0015	NA	1	NA	NA	NA	NA	DENND1A_exon_chr9:126164191
1	HMGN2	694.0152	761.1016	0.1295	0.7866	NC	No	No	1	HMGN2_exon_chr1:26801603	1.0	1.0	0.0	NA	1	NA	NA	NA	NA	HMGN2_exon_chr1:26801603
1	TOMM6	845.7421	753.5648	-0.17	0.7326	NC	No	No	1	TOMM6_exon_chr6:41757268	1.0	1.0	0.0	NA	1	NA	NA	NA	NA	TOMM6_exon_chr6:41757268
1	CPM	34.4635	27.4	-0.3135	1.0	NC	No	No	1	CPM_exon_chr12:69250459	1.0	1.0	0.0	NA	4	NA	NA	NA	NA	CPM_exon_chr12:69250459
1	H2BC5	135.0674	120.9821	-0.174	1.0	NC	No	No	1	H2BC5_exon_chr6:26171202	1.0	1.0	0.0	NA	1	NA	NA	NA	NA	H2BC5_exon_chr6:26171202
1	COASY	159.5117	88.1019	-0.8444	1.0	NC	No	No	1	COASY_exon_chr17:40717923	1.0	1.0	0.0	NA	1	NA	NA	NA	NA	COASY_exon_chr17:40717923
1	FRMD4B	16.5097	5.4457	-1.6222	0.9269	NC	No	No	1	FRMD4B_exon_chr3:69221132	1.0	1.0	0.0	NA	2	NA	NA	NA	NA	FRMD4B_exon_chr3:69221132
1	MAFF	6.6034	10.8015	0.7514	1.0	NC	No	No	1	MAFF_exon_chr22:38610426	1.0	1.0	0.0	NA	1	NA	NA	NA	NA	MAFF_exon_chr22:38610426
1	C16orf74	13.6802	55.7309	1.9747	0.585	NC	No	No	1	C16orf74_exon_chr16:85741672	1.0	1.0	0.0	NA	1	NA	NA	NA	NA	C16orf74_exon_chr16:85741672
1	FAM161A	20.6983	11.3172	-0.8555	1.0	NC	No	No	2	FAM161A_exon_chr2:62053734	0.1184	0.0967	-0.0217	NA	1	NA	NA	NA	NA	FAM161A_exon_chr2:62053734
2	FAM161A									FAM161A_exon_chr2:62065840	0.8816	0.9033	0.0217	NA	1	NA	NA	NA	NA	FAM161A_exon_chr2:62065840
1	C1orf53	85.3017	36.9716	-1.1975	1.0	NC	No	No	1	C1orf53_exon_chr1:197876278	1.0	1.0	0.0	NA	1	NA	NA	NA	NA	C1orf53_exon_chr1:197876278
1	SGF29	69.5503	54.4336	-0.3369	1.0	NC	No	No	1	SGF29_exon_chr16:28602910	1.0	1.0	0.0	NA	1	NA	NA	NA	NA	SGF29_exon_chr16:28602910
1	PLA2G10	2.9678	1.8005	-0.7271	1.0	NC	No	No	1	PLA2G10_exon_chr16:14766606	1.0	1.0	0.0	NA	1	NA	NA	NA	NA	PLA2G10_exon_chr16:14766606
1	SFXN3	0.8129	8.0376	3.2375	1.0	NC	No	No	1	SFXN3_exon_chr10:102799245	1.0	1.0	0.0	NA	1	NA	NA	NA	NA	SFXN3_exon_chr10:102799245
1	EIF4G3	78.5367	161.902	1.0402	1.0	NC	No	No	2	EIF4G3_exon_chr1:21133993	1.0	0.8593	-0.1407	NA	1	NA	NA	NA	NA	EIF4G3_exon_chr1:21133993
2	EIF4G3									EIF4G3_exon_chr1:21187010	0.0	0.115	0.115	NA	5	0.7651	0.7842	0.0191	NA	EIF4G3_exon_chr1:21187010
1	FANK1	13.9782	8.102	-0.7787	1.0	NC	No	No	1	FANK1_exon_chr10:127697941	1.0	1.0	0.0	NA	1	NA	NA	NA	NA	FANK1_exon_chr10:127697941
1	TMED8	27.6397	30.6135	0.1422	1.0	NC	No	No	1	TMED8_exon_chr14:77808331	1.0	1.0	0.0	NA	1	NA	NA	NA	NA	TMED8_exon_chr14:77808331
1	CCDC91	44.9181	80.4173	0.8736	1.0	NC	No	No	2	CCDC91_exon_chr12:28605410	0.4669	0.4049	-0.062	NA	2	NA	NA	NA	NA	CCDC91_exon_chr12:28605410
2	CCDC91									CCDC91_exon_chr12:28701995	0.5331	0.4671	-0.0659	NA	4	0.6898	0.5388	-0.151	NA	CCDC91_exon_chr12:28701995
1	HOMEZ	64.5673	75.5145	0.2058	1.0	NC	No	No	1	HOMEZ_exon_chr14:23746396	1.0	1.0	0.0	NA	2	0.6901	0.4674	-0.2227	NA	HOMEZ_exon_chr14:23746396
1	EDNRB	14.3346	23.406	0.703	1.0	NC	No	No	1	EDNRB_exon_chr13:78472469	1.0	1.0	0.0	NA	3	NA	NA	NA	NA	EDNRB_exon_chr13:78472469
1	NDUFB3	596.6651	489.3543	-0.2846	0.5017	NC	No	No	1	NDUFB3_exon_chr2:201950181	1.0	1.0	0.0	NA	1	NA	NA	NA	NA	NDUFB3_exon_chr2:201950181
1	MEAF6	67.4496	110.4459	0.7042	1.0	NC	No	No	1	MEAF6_exon_chr1:37959708	1.0	1.0	0.0	NA	2	0.4717	0.3013	-0.1704	NA	MEAF6_exon_chr1:37959708
1	MTMR1	35.7187	113.1913	1.6973	0.7637	NC	No	No	1	MTMR1_exon_chrX:149931037	1.0	1.0	0.0	NA	2	0.0082	0.0537	0.0455	NA	MTMR1_exon_chrX:149931037
1	PFDN4	720.7407	954.8373	0.4064	0.3306	NC	No	No	2	PFDN4_exon_chr20:52831838	0.0361	0.151	0.1148	NA	1	NA	NA	NA	NA	PFDN4_exon_chr20:52831838
2	PFDN4									PFDN4_exon_chr20:52835557	0.9639	0.849	-0.1148	NA	9	0.2189	0.163	-0.0559	NA	PFDN4_exon_chr20:52835557
1	LOC389906	37.9976	50.4271	0.3941	1.0	NC	No	No	1	LOC389906_exon_chrX:3735819	1.0	1.0	0.0	NA	1	NA	NA	NA	NA	LOC389906_exon_chrX:3735819
1	CCDC50	115.7301	117.9744	0.0478	1.0	NC	No	No	1	CCDC50_exon_chr3:191109529	1.0	1.0	0.0	NA	4	0.0982	0.0993	0.0011	NA	CCDC50_exon_chr3:191109529
1	WDR18	117.4997	172.758	0.5395	0.807	NC	No	No	1	WDR18_exon_chr19:994211	1.0	1.0	0.0	NA	1	NA	NA	NA	NA	WDR18_exon_chr19:994211
1	GPR108	26.5415	47.1452	0.8203	1.0	NC	No	No	1	GPR108_exon_chr19:6730395	1.0	1.0	0.0	NA	1	NA	NA	NA	NA	GPR108_exon_chr19:6730395
1	PIGL	4.2022	16.3604	2.0189	0.9086	NC	No	No	1	PIGL_exon_chr17:16229113	1.0	1.0	0.0	NA	1	NA	NA	NA	NA	PIGL_exon_chr17:16229113
1	CHCHD2	699.6349	582.2993	-0.2676	0.6101	NC	No	No	1	CHCHD2_exon_chr7:56169554	1.0	1.0	0.0	NA	1	NA	NA	NA	NA	CHCHD2_exon_chr7:56169554
1	CHD3	46.1112	27.5527	-0.7603	1.0	NC	No	No	1	CHD3_exon_chr17:7814781	1.0	1.0	0.0	NA	2	0.0314	0.194	0.1626	NA	CHD3_exon_chr17:7814781
1	LHPP	21.4953	5.5302	-1.9463	0.8651	NC	No	No	2	LHPP_exon_chr10:126186896	0.3812	0.849	0.4677	NA	1	NA	NA	NA	NA	LHPP_exon_chr10:126186896
2	LHPP									LHPP_exon_chr10:126301832	0.6188	0.151	-0.4677	NA	1	NA	NA	NA	NA	LHPP_exon_chr10:126301832
1	NSMCE1	30.9868	26.0126	-0.2734	1.0	NC	No	No	1	NSMCE1_exon_chr16:27236557	1.0	1.0	0.0	NA	1	NA	NA	NA	NA	NSMCE1_exon_chr16:27236557
1	MEN1	4.9418	8.4914	0.757	1.0	NC	No	No	1	MEN1_exon_chr11:64572288	1.0	1.0	0.0	NA	1	NA	NA	NA	NA	MEN1_exon_chr11:64572288
1	KLHL7-DT	0.0	1.2861	2.8393	1.0	NC	No	No	1	KLHL7-DT_exon_chr7:23143197	1.0	1.0	0.0	NA	1	NA	NA	NA	NA	KLHL7-DT_exon_chr7:23143197
1	BORCS8	28.8991	24.6724	-0.2428	1.0	NC	No	No	2	BORCS8_exon_chr19:19288269	0.443	0.9244	0.4814	NA	1	NA	NA	NA	NA	BORCS8_exon_chr19:19288269
2	BORCS8									BORCS8_exon_chr19:19293492	0.557	0.0756	-0.4814	NA	1	NA	NA	NA	NA	BORCS8_exon_chr19:19293492
1	NRAS	157.7412	162.6745	0.0412	1.0	NC	No	No	1	NRAS_exon_chr1:115250671	1.0	1.0	0.0	NA	7	0.334	0.4621	0.1281	NA	NRAS_exon_chr1:115250671
1	DCUN1D1	95.3681	56.8283	-0.7631	1.0	NC	No	No	1	DCUN1D1_exon_chr3:182662961	1.0	1.0	0.0	NA	13	0.5788	0.5977	NA	NA	DCUN1D1_exon_chr3:182662961
1	LOC112268124	2.4388	16.1501	2.6841	0.8518	NC	No	No	1	LOC112268124_exon_chr14:35343396	1.0	1.0	0.0	NA	2	NA	NA	NA	NA	LOC112268124_exon_chr14:35343396
1	HNRNPUL2	304.8182	445.4948	0.5566	0.4056	NC	No	No	1	HNRNPUL2_exon_chr11:62482851	1.0	1.0	0.0	NA	5	0.9318	0.8263	-0.1055	NA	HNRNPUL2_exon_chr11:62482851
1	TMEM200B	0.0	16.7183	6.5211	0.3936	NC	No	No	1	TMEM200B_exon_chr1:29448360	1.0	1.0	0.0	NA	1	NA	NA	NA	NA	TMEM200B_exon_chr1:29448360
1	ZNF148	71.4995	80.5518	0.1553	1.0	NC	No	No	2	ZNF148_exon_chr3:124952783	0.8859	0.9233	0.0374	NA	1	NA	NA	NA	NA	ZNF148_exon_chr3:124952783
2	ZNF148									ZNF148_exon_chr3:125007072	0.1141	0.0767	-0.0374	NA	6	0.1122	0.1552	0.043	NA	ZNF148_exon_chr3:125007072
1	TIMM23B-AGAP6	27.1662	33.2056	0.3241	1.0	NC	No	No	1	TIMM23B-AGAP6_exon_chr10:51732771	1.0	1.0	0.0	NA	2	NA	NA	NA	NA	TIMM23B-AGAP6_exon_chr10:51732771
1	TCFL5	40.0156	40.3511	0.0071	1.0	NC	No	No	2	TCFL5_exon_chr20:61473449	0.2306	0.2231	-0.0075	NA	2	NA	NA	NA	NA	TCFL5_exon_chr20:61473449
2	TCFL5									TCFL5_exon_chr20:61484240	0.7694	0.7769	0.0075	NA	1	NA	NA	NA	NA	TCFL5_exon_chr20:61484240
1	URB2	39.8215	42.6318	0.0855	1.0	NC	No	No	1	URB2_exon_chr1:229794846	1.0	1.0	0.0	NA	4	0.8	0.5442	-0.2558	NA	URB2_exon_chr1:229794846
1	GOLGA5	231.5964	184.638	-0.3243	1.0	NC	No	No	1	GOLGA5_exon_chr14:93305710	1.0	1.0	0.0	NA	2	0.1791	0.137	-0.042	NA	GOLGA5_exon_chr14:93305710
1	REEP4	75.8108	83.686	0.1405	1.0	NC	No	No	1	REEP4_exon_chr8:21996065	1.0	1.0	0.0	NA	1	NA	NA	NA	NA	REEP4_exon_chr8:21996065
1	HDGFL2	67.4562	67.6051	-0.0012	1.0	NC	No	No	1	HDGFL2_exon_chr19:4501922	1.0	1.0	0.0	NA	1	NA	NA	NA	NA	HDGFL2_exon_chr19:4501922
1	ZNF821	9.0046	9.0026	0.0249	1.0	NC	No	No	1	ZNF821_exon_chr16:71894575	1.0	1.0	0.0	NA	1	NA	NA	NA	NA	ZNF821_exon_chr16:71894575
1	MRPL10	155.952	115.1292	-0.4478	0.8405	NC	No	No	1	MRPL10_exon_chr17:45901824	1.0	1.0	0.0	NA	1	NA	NA	NA	NA	MRPL10_exon_chr17:45901824
1	IKBIP	109.3979	93.0196	-0.2295	1.0	NC	No	No	2	IKBIP_exon_chr12:99008118	0.6877	0.3894	-0.2983	NA	5	0.785	0.5903	-0.1947	NA	IKBIP_exon_chr12:99008118
2	IKBIP									IKBIP_exon_chr12:99020544	0.3123	0.5349	0.2225	NA	1	NA	NA	NA	NA	IKBIP_exon_chr12:99020544
1	IDH1	379.3196	273.4147	-0.4753	0.4696	NC	No	No	1	IDH1_exon_chr2:209101893	1.0	1.0	0.0	NA	1	NA	NA	NA	NA	IDH1_exon_chr2:209101893
1	BTG3	131.4699	174.2016	0.4151	1.0	NC	No	No	2	BTG3_exon_chr21:18966650	0.813	0.7379	-0.075	NA	1	NA	NA	NA	NA	BTG3_exon_chr21:18966650
2	BTG3									BTG3_exon_chr21:18981470	0.187	0.2621	0.075	NA	1	NA	NA	NA	NA	BTG3_exon_chr21:18981470
1	CLBA1	8.4043	0.0	-5.5914	1.0	NC	No	No	1	CLBA1_exon_chr14:105459551	1.0	1.0	0.0	NA	1	NA	NA	NA	NA	CLBA1_exon_chr14:105459551
1	RANBP6	70.3242	81.4129	0.2242	1.0	NC	No	No	1	RANBP6_exon_chr9:6015624	1.0	1.0	0.0	NA	3	NA	NA	NA	NA	RANBP6_exon_chr9:6015624
1	ECM1	21.0789	5.6199	-1.9302	0.7966	NC	No	No	1	ECM1_exon_chr1:150485712	1.0	1.0	0.0	NA	2	NA	NA	NA	NA	ECM1_exon_chr1:150485712
1	BCL10	116.7249	68.7589	-0.7639	1.0	NC	No	No	1	BCL10_exon_chr1:85733665	1.0	1.0	0.0	NA	4	NA	NA	NA	NA	BCL10_exon_chr1:85733665
1	CCDC32	4.0647	3.2863	-0.3284	1.0	NC	No	No	1	CCDC32_exon_chr15:40846326	1.0	1.0	0.0	NA	1	NA	NA	NA	NA	CCDC32_exon_chr15:40846326
1	TMEM116	6.9504	9.243	0.3879	1.0	NC	No	No	1	TMEM116_exon_chr12:112369631	1.0	1.0	0.0	NA	1	NA	NA	NA	NA	TMEM116_exon_chr12:112369631
1	ZNF837	4.1231	0.0	-4.582	1.0	NC	No	No	1	ZNF837_exon_chr19:58880728	1.0	1.0	0.0	NA	1	NA	NA	NA	NA	ZNF837_exon_chr19:58880728
1	NUFIP1	48.5742	120.6533	1.3017	0.684	NC	No	No	1	NUFIP1_exon_chr13:45515457	1.0	1.0	0.0	NA	2	0.0045	0.1063	0.1018	NA	NUFIP1_exon_chr13:45515457
1	PTGES3L-AARSD1	46.1737	55.0228	0.2439	1.0	NC	No	No	1	PTGES3L-AARSD1_exon_chr17:41102745	1.0	1.0	0.0	NA	1	NA	NA	NA	NA	PTGES3L-AARSD1_exon_chr17:41102745
1	TTC7B	168.7618	149.8708	-0.1695	1.0	NC	No	No	1	TTC7B_exon_chr14:91007933	1.0	1.0	0.0	NA	1	NA	NA	NA	NA	TTC7B_exon_chr14:91007933
1	AP2A2	227.9866	184.7617	-0.2932	1.0	NC	No	No	1	AP2A2_exon_chr11:1010547	1.0	1.0	0.0	NA	1	NA	NA	NA	NA	AP2A2_exon_chr11:1010547
1	PALM3	120.4039	173.8856	0.5428	0.8405	NC	No	No	1	PALM3_exon_chr19:14166038	1.0	1.0	0.0	NA	5	0.533	0.4331	-0.0999	NA	PALM3_exon_chr19:14166038
1	LSM8	145.2706	146.8923	0.0311	1.0	NC	No	No	1	LSM8_exon_chr7:117831965	1.0	1.0	0.0	NA	5	0.2033	0.0	-0.2033	NA	LSM8_exon_chr7:117831965
1	CELSR1	91.8566	58.0364	-0.6616	1.0	NC	No	No	1	CELSR1_exon_chr22:46759084	1.0	1.0	0.0	NA	1	NA	NA	NA	NA	CELSR1_exon_chr22:46759084
1	KANK1	29.1093	23.7915	-0.2786	1.0	NC	No	No	3	KANK1_exon_chr9:473193	0.0935	0.0	-0.0935	NA	1	NA	NA	NA	NA	KANK1_exon_chr9:473193
2	KANK1									KANK1_exon_chr9:549106	0.1214	0.4053	0.284	NA	1	NA	NA	NA	NA	KANK1_exon_chr9:549106
3	KANK1									KANK1_exon_chr9:745172	0.7851	0.5947	-0.1904	NA	1	NA	NA	NA	NA	KANK1_exon_chr9:745172
1	IGSF9	1.8622	2.1102	0.2001	1.0	NC	No	No	1	IGSF9_exon_chr1:159897316	1.0	1.0	0.0	NA	1	NA	NA	NA	NA	IGSF9_exon_chr1:159897316
1	MRPL53	610.9981	685.5987	0.1613	0.7433	NC	No	No	1	MRPL53_exon_chr2:74699379	1.0	1.0	0.0	NA	1	NA	NA	NA	NA	MRPL53_exon_chr2:74699379
1	APOBEC3A	34.9361	15.3722	-1.1783	1.0	NC	No	No	1	APOBEC3A_exon_chr22:39388435	1.0	1.0	0.0	NA	1	NA	NA	NA	NA	APOBEC3A_exon_chr22:39388435
1	CETN2	97.989	125.9309	0.3476	1.0	NC	No	No	2	CETN2_exon_chrX:151996474	0.9461	0.5738	-0.3723	NA	1	NA	NA	NA	NA	CETN2_exon_chrX:151996474
2	CETN2									CETN2_exon_chrX:151997821	0.0539	0.4262	0.3723	NA	1	NA	NA	NA	NA	CETN2_exon_chrX:151997821
1	NOCT	14.7328	18.7128	0.3493	1.0	NC	No	No	1	NOCT_exon_chr4:139965792	1.0	1.0	0.0	NA	1	NA	NA	NA	NA	NOCT_exon_chr4:139965792
1	HP1BP3	147.5459	141.7887	-0.0639	1.0	NC	No	No	3	HP1BP3_exon_chr1:21071584	0.9015	0.818	-0.0834	NA	4	0.6843	0.662	-0.0223	NA	HP1BP3_exon_chr1:21071584
2	HP1BP3									HP1BP3_exon_chr1:21100103	0.0239	0.1223	0.0984	NA	1	NA	NA	NA	NA	HP1BP3_exon_chr1:21100103
3	HP1BP3									HP1BP3_exon_chr1:21103243	0.0746	0.0596	-0.015	NA	3	NA	NA	NA	NA	HP1BP3_exon_chr1:21103243
1	BUB3	353.7316	501.2624	0.4937	0.322	NC	No	No	1	BUB3_exon_chr10:124923335	1.0	1.0	0.0	NA	7	0.5991	0.5484	-0.0507	NA	BUB3_exon_chr10:124923335
1	SLC31A1	203.4103	182.8102	-0.1631	1.0	NC	No	No	1	SLC31A1_exon_chr9:116022551	1.0	1.0	0.0	NA	2	0.5368	0.619	0.0822	NA	SLC31A1_exon_chr9:116022551
1	SEPTIN10	155.2106	216.8312	0.4678	0.8642	NC	No	No	1	SEPTIN10_exon_chr2:110303814	1.0	1.0	0.0	NA	3	0.766	0.8493	0.0834	NA	SEPTIN10_exon_chr2:110303814
1	TMEM218	9.4829	0.0	-5.7868	1.0	NC	No	No	1	TMEM218_exon_chr11:124967636	1.0	1.0	0.0	NA	1	NA	NA	NA	NA	TMEM218_exon_chr11:124967636
1	AMOTL1	43.7814	43.5885	-0.0064	1.0	NC	No	No	1	AMOTL1_exon_chr11:94603853	1.0	1.0	0.0	NA	5	NA	NA	NA	NA	AMOTL1_exon_chr11:94603853
1	CEP131	20.185	19.7498	-0.0027	1.0	NC	No	No	1	CEP131_exon_chr17:79163643	1.0	1.0	0.0	NA	1	NA	NA	NA	NA	CEP131_exon_chr17:79163643
1	PPT1	678.4746	723.0927	0.0935	0.8365	NC	No	No	1	PPT1_exon_chr1:40539855	1.0	1.0	0.0	NA	1	NA	NA	NA	NA	PPT1_exon_chr1:40539855
1	SPTLC3	11.0475	17.9139	0.6829	1.0	NC	No	No	1	SPTLC3_exon_chr20:13145400	1.0	1.0	0.0	NA	3	NA	NA	NA	NA	SPTLC3_exon_chr20:13145400
1	MYO9A	2.9303	30.217	3.3016	0.3847	NC	No	No	2	MYO9A_exon_chr15:72119384	1.0	0.7236	-0.2764	NA	1	NA	NA	NA	NA	MYO9A_exon_chr15:72119384
2	MYO9A									MYO9A_exon_chr15:72191373	0.0	0.2764	0.2764	NA	3	NA	NA	NA	NA	MYO9A_exon_chr15:72191373
1	CYC1	439.4486	505.42	0.2035	0.7676	NC	No	No	1	CYC1_exon_chr8:145152134	1.0	1.0	0.0	NA	1	NA	NA	NA	NA	CYC1_exon_chr8:145152134
1	SRD5A3	18.119	38.9473	1.0813	1.0	NC	No	No	1	SRD5A3_exon_chr4:56235998	1.0	1.0	0.0	NA	3	NA	NA	NA	NA	SRD5A3_exon_chr4:56235998
1	YWHAG	191.4562	184.7634	-0.051	1.0	NC	No	No	1	YWHAG_exon_chr7:75959550	1.0	1.0	0.0	NA	1	NA	NA	NA	NA	YWHAG_exon_chr7:75959550
1	DLEU1	26.4641	7.0731	-1.9033	0.9611	NC	No	No	1	DLEU1_exon_chr13:50678839	1.0	1.0	0.0	NA	1	NA	NA	NA	NA	DLEU1_exon_chr13:50678839
1	LYSMD1	6.5036	16.7826	1.3524	0.9994	NC	No	No	1	LYSMD1_exon_chr1:151133496	1.0	1.0	0.0	NA	1	NA	NA	NA	NA	LYSMD1_exon_chr1:151133496
1	ZSCAN25	40.3882	30.6048	-0.3989	1.0	NC	No	No	2	ZSCAN25_exon_chr7:99226813	0.3412	0.4338	0.0926	NA	3	NA	NA	NA	NA	ZSCAN25_exon_chr7:99226813
2	ZSCAN25									ZSCAN25_exon_chr7:99266717	0.6588	0.5662	-0.0926	NA	1	NA	NA	NA	NA	ZSCAN25_exon_chr7:99266717
1	GALNT7	54.4842	77.8232	0.5166	1.0	NC	No	No	1	GALNT7_exon_chr4:174242730	1.0	1.0	0.0	NA	2	0.8491	0.6729	-0.1762	NA	GALNT7_exon_chr4:174242730
1	MPHOSPH10	196.1602	154.0037	-0.361	0.9217	NC	No	No	1	MPHOSPH10_exon_chr2:71376995	1.0	1.0	0.0	NA	1	NA	NA	NA	NA	MPHOSPH10_exon_chr2:71376995
1	RPS19BP1	328.2074	197.3998	-0.7266	0.502	NC	No	No	1	RPS19BP1_exon_chr22:39925628	1.0	1.0	0.0	NA	1	NA	NA	NA	NA	RPS19BP1_exon_chr22:39925628
1	RRP1	39.9336	24.4021	-0.6959	1.0	NC	No	No	1	RRP1_exon_chr21:45223392	1.0	1.0	0.0	NA	1	NA	NA	NA	NA	RRP1_exon_chr21:45223392
1	CC2D1B	96.1147	129.3426	0.4149	1.0	NC	No	No	1	CC2D1B_exon_chr1:52819319	1.0	1.0	0.0	NA	1	NA	NA	NA	NA	CC2D1B_exon_chr1:52819319
1	HS3ST3B1	61.2437	32.2826	-0.9275	1.0	NC	No	No	1	HS3ST3B1_exon_chr17:14248344	1.0	1.0	0.0	NA	1	NA	NA	NA	NA	HS3ST3B1_exon_chr17:14248344
1	PLEKHG4	0.0	13.8247	6.2469	0.4304	NC	No	No	1	PLEKHG4_exon_chr16:67322705	1.0	1.0	0.0	NA	1	NA	NA	NA	NA	PLEKHG4_exon_chr16:67322705
1	HTATSF1P2	0.0	1.2861	2.8393	1.0	NC	No	No	1	HTATSF1P2_exon_chr6:3024124	1.0	1.0	0.0	NA	1	NA	NA	NA	NA	HTATSF1P2_exon_chr6:3024124
1	SNORD118	39.3178	9.043	-2.1189	1.0	NC	No	No	1	SNORD118_exon_chr17:8077590	1.0	1.0	0.0	NA	5	NA	NA	NA	NA	SNORD118_exon_chr17:8077590
1	USF1	0.0	2.5942	3.8245	1.0	NC	No	No	1	USF1_exon_chr1:161015767	1.0	1.0	0.0	NA	1	NA	NA	NA	NA	USF1_exon_chr1:161015767
1	ZBTB46-AS1	6.5036	0.5144	-3.6064	1.0	NC	No	No	1	ZBTB46-AS1_exon_chr20:62453474	1.0	1.0	0.0	NA	1	NA	NA	NA	NA	ZBTB46-AS1_exon_chr20:62453474
1	TMEM241	23.0676	5.6773	-2.0145	0.741	NC	No	No	1	TMEM241_exon_chr18:20878031	1.0	1.0	0.0	NA	2	NA	NA	NA	NA	TMEM241_exon_chr18:20878031
1	C1orf43	242.2792	253.5592	0.0669	1.0	NC	No	No	2	C1orf43_exon_chr1:154180124	0.9189	0.8859	-0.033	NA	1	NA	NA	NA	NA	C1orf43_exon_chr1:154180124
2	C1orf43									C1orf43_exon_chr1:154184854	0.0811	0.1141	0.033	NA	3	NA	NA	NA	NA	C1orf43_exon_chr1:154184854
1	LONP2	109.3984	63.6331	-0.7728	1.0	NC	No	No	1	LONP2_exon_chr16:48385491	1.0	1.0	0.0	NA	5	0.4298	0.0731	-0.3568	NA	LONP2_exon_chr16:48385491
1	APP	526.6517	446.1733	-0.2327	0.7119	NC	No	No	1	APP_exon_chr21:27254082	1.0	1.0	0.0	NA	2	0.3564	0.3777	0.0214	NA	APP_exon_chr21:27254082
1	CHID1	58.5276	65.2314	0.1531	1.0	NC	No	No	1	CHID1_exon_chr11:869956	1.0	1.0	0.0	NA	2	0.3747	0.2539	-0.1208	NA	CHID1_exon_chr11:869956
1	G3BP2	218.4174	216.3023	-0.0059	1.0	NC	No	No	1	G3BP2_exon_chr4:76570886	1.0	1.0	0.0	NA	6	0.7851	0.6285	-0.1567	NA	G3BP2_exon_chr4:76570886
1	CTBS	19.4723	34.2994	0.7946	1.0	NC	No	No	1	CTBS_exon_chr1:85020882	1.0	1.0	0.0	NA	4	NA	NA	NA	NA	CTBS_exon_chr1:85020882
1	TACC3	72.3054	63.1991	-0.1975	1.0	NC	No	No	2	TACC3_exon_chr4:1725147	0.094	0.0293	-0.0646	NA	1	NA	NA	NA	NA	TACC3_exon_chr4:1725147
2	TACC3									TACC3_exon_chr4:1746674	0.906	0.9707	0.0646	NA	1	NA	NA	NA	NA	TACC3_exon_chr4:1746674
1	CCDC84	56.4818	47.7421	-0.2248	1.0	NC	No	No	1	CCDC84_exon_chr11:118886247	1.0	1.0	0.0	NA	1	NA	NA	NA	NA	CCDC84_exon_chr11:118886247
1	CYB5D1	35.2297	13.3632	-1.3885	1.0	NC	No	No	1	CYB5D1_exon_chr17:7762699	1.0	1.0	0.0	NA	1	NA	NA	NA	NA	CYB5D1_exon_chr17:7762699
1	SNRNP27	193.8147	166.3369	-0.2138	1.0	NC	No	No	1	SNRNP27_exon_chr2:70131385	1.0	1.0	0.0	NA	3	0.5268	0.7932	0.2664	NA	SNRNP27_exon_chr2:70131385
1	MIF-AS1	0.0	2.5722	3.8305	1.0	NC	No	No	1	MIF-AS1_exon_chr22:24237719	1.0	1.0	0.0	NA	1	NA	NA	NA	NA	MIF-AS1_exon_chr22:24237719
1	INTS14	108.7583	72.0752	-0.5949	1.0	NC	No	No	1	INTS14_exon_chr15:65871997	1.0	1.0	0.0	NA	1	NA	NA	NA	NA	INTS14_exon_chr15:65871997
1	HRK	9.8552	0.643	-3.934	1.0	NC	No	No	1	HRK_exon_chr12:117299271	1.0	1.0	0.0	NA	1	NA	NA	NA	NA	HRK_exon_chr12:117299271
1	BRAT1	142.4911	115.2891	-0.311	1.0	NC	No	No	1	BRAT1_exon_chr7:2578578	1.0	1.0	0.0	NA	1	NA	NA	NA	NA	BRAT1_exon_chr7:2578578
1	HPS6	24.9921	15.824	-0.6769	1.0	NC	No	No	1	HPS6_exon_chr10:103825105	1.0	1.0	0.0	NA	1	NA	NA	NA	NA	HPS6_exon_chr10:103825105
1	SUPT4H1	434.4809	460.528	0.0819	0.8852	NC	No	No	1	SUPT4H1_exon_chr17:56423674	1.0	1.0	0.0	NA	3	0.2274	0.2563	0.0289	NA	SUPT4H1_exon_chr17:56423674
1	ZNF83	40.9678	33.523	-0.2793	1.0	NC	No	No	1	ZNF83_exon_chr19:53118050	1.0	1.0	0.0	NA	3	NA	NA	NA	NA	ZNF83_exon_chr19:53118050
1	CUTA	136.0354	126.3055	-0.1122	1.0	NC	No	No	1	CUTA_exon_chr6:33384553	1.0	1.0	0.0	NA	1	NA	NA	NA	NA	CUTA_exon_chr6:33384553
1	SMPD3	18.5097	2.0577	-3.1315	0.8187	NC	No	No	1	SMPD3_exon_chr16:68395210	1.0	1.0	0.0	NA	1	NA	NA	NA	NA	SMPD3_exon_chr16:68395210
1	YARS1	445.4659	457.2739	0.0388	0.9365	NC	No	No	1	YARS1_exon_chr1:33241692	1.0	1.0	0.0	NA	1	NA	NA	NA	NA	YARS1_exon_chr1:33241692
1	CSAD	10.1445	0.7412	-3.8246	1.0	NC	No	No	1	CSAD_exon_chr12:53552468	1.0	1.0	0.0	NA	1	NA	NA	NA	NA	CSAD_exon_chr12:53552468
1	GPR1	30.6482	4.9514	-2.5963	0.5207	NC	No	No	1	GPR1_exon_chr2:207041999	1.0	1.0	0.0	NA	1	NA	NA	NA	NA	GPR1_exon_chr2:207041999
1	GNG10	463.5423	386.9537	-0.2655	0.6589	NC	No	No	1	GNG10_exon_chr9:114431548	1.0	1.0	0.0	NA	2	0.4904	0.4775	-0.0129	NA	GNG10_exon_chr9:114431548
1	TLK2	35.9896	68.4631	0.957	1.0	NC	No	No	4	TLK2_exon_chr17:60585768	0.4164	0.2134	-0.2029	NA	1	NA	NA	NA	NA	TLK2_exon_chr17:60585768
2	TLK2									TLK2_exon_chr17:60631023	0.0	0.1847	0.1847	NA	1	NA	NA	NA	NA	TLK2_exon_chr17:60631023
3	TLK2									TLK2_exon_chr17:60637376	0.1999	0.3199	0.1201	NA	3	NA	NA	NA	NA	TLK2_exon_chr17:60637376
4	TLK2									TLK2_exon_chr17:60689752	0.3838	0.2819	-0.1019	NA	1	NA	NA	NA	NA	TLK2_exon_chr17:60689752
1	ST13P4	16.493	41.6637	1.3125	0.9028	NC	No	No	1	ST13P4_exon_chr13:50746153	1.0	1.0	0.0	NA	1	NA	NA	NA	NA	ST13P4_exon_chr13:50746153
1	CCNC	294.7529	259.801	-0.1869	1.0	NC	No	No	1	CCNC_exon_chr6:99991485	1.0	1.0	0.0	NA	1	NA	NA	NA	NA	CCNC_exon_chr6:99991485
1	RPS6KA4	288.7848	253.0681	-0.1992	1.0	NC	No	No	1	RPS6KA4_exon_chr11:64138754	1.0	1.0	0.0	NA	1	NA	NA	NA	NA	RPS6KA4_exon_chr11:64138754
1	TNFAIP8	126.2713	160.6044	0.3583	1.0	NC	No	No	1	TNFAIP8_exon_chr5:118728510	1.0	1.0	0.0	NA	8	0.064	0.1544	0.0904	NA	TNFAIP8_exon_chr5:118728510
1	FOXN3-AS1	0.0	4.3727	4.5922	1.0	NC	No	No	1	FOXN3-AS1_exon_chr14:89885503	1.0	1.0	0.0	NA	1	NA	NA	NA	NA	FOXN3-AS1_exon_chr14:89885503
1	PDCD2L	85.3799	84.3645	-0.0092	1.0	NC	No	No	1	PDCD2L_exon_chr19:34916894	1.0	1.0	0.0	NA	1	NA	NA	NA	NA	PDCD2L_exon_chr19:34916894
1	SUPT3H	31.0035	51.3125	0.7396	1.0	NC	No	No	1	SUPT3H_exon_chr6:44797594	1.0	1.0	0.0	NA	1	NA	NA	NA	NA	SUPT3H_exon_chr6:44797594
1	ACSS3	24.2052	24.7216	0.0597	1.0	NC	No	No	1	ACSS3_exon_chr12:81648635	1.0	1.0	0.0	NA	1	NA	NA	NA	NA	ACSS3_exon_chr12:81648635
1	NUDT13	1.2006	1.5433	0.4601	1.0	NC	No	No	1	NUDT13_exon_chr10:74890460	1.0	1.0	0.0	NA	1	NA	NA	NA	NA	NUDT13_exon_chr10:74890460
1	PTPN11	151.3125	216.3384	0.507	1.0	NC	No	No	2	PTPN11_exon_chr12:112890998	0.0	0.109	0.109	NA	1	NA	NA	NA	NA	PTPN11_exon_chr12:112890998
2	PTPN11									PTPN11_exon_chr12:112943628	1.0	0.891	-0.109	NA	5	0.9473	0.8872	-0.06	NA	PTPN11_exon_chr12:112943628
1	FYN	1.9661	2.6247	0.3774	1.0	NC	No	No	1	FYN_exon_chr6:111983150	1.0	1.0	0.0	NA	1	NA	NA	NA	NA	FYN_exon_chr6:111983150
1	GCC1	68.163	44.249	-0.6005	1.0	NC	No	No	1	GCC1_exon_chr7:127223363	1.0	1.0	0.0	NA	2	0.0057	0.1485	0.1428	NA	GCC1_exon_chr7:127223363
1	CASP4	36.0866	48.9653	0.4192	1.0	NC	No	No	2	CASP4_exon_chr11:104813700	0.7016	0.8732	0.1716	NA	1	NA	NA	NA	NA	CASP4_exon_chr11:104813700
2	CASP4									CASP4_exon_chr11:104825728	0.2984	0.1268	-0.1716	NA	1	NA	NA	NA	NA	CASP4_exon_chr11:104825728
1	ZNF529	26.3667	0.0	-7.251	0.0311	DOWN	No	No	1	ZNF529_exon_chr19:37039224	1.0	1.0	0.0	NA	2	NA	NA	NA	NA	ZNF529_exon_chr19:37039224
1	ZNF239	10.2962	32.0867	1.6712	1.0	NC	No	No	1	ZNF239_exon_chr10:44053619	1.0	1.0	0.0	NA	2	NA	NA	NA	NA	ZNF239_exon_chr10:44053619
1	CAVIN4	6.0031	2.0577	-1.5101	1.0	NC	No	No	1	CAVIN4_exon_chr9:103348046	1.0	1.0	0.0	NA	2	NA	NA	NA	NA	CAVIN4_exon_chr9:103348046
1	JRK	9.7034	2.6856	-1.8526	1.0	NC	No	No	1	JRK_exon_chr8:143746087	1.0	1.0	0.0	NA	2	NA	NA	NA	NA	JRK_exon_chr8:143746087
1	PLEKHA3	11.2601	14.1317	0.3147	1.0	NC	No	No	1	PLEKHA3_exon_chr2:179368486	1.0	1.0	0.0	NA	5	NA	NA	NA	NA	PLEKHA3_exon_chr2:179368486
1	LITAF	208.9109	181.069	-0.2119	1.0	NC	No	No	1	LITAF_exon_chr16:11643601	1.0	1.0	0.0	NA	4	0.3758	0.2765	-0.0993	NA	LITAF_exon_chr16:11643601
1	HYAL4	1.3549	7.4121	2.4158	1.0	NC	No	No	1	HYAL4_exon_chr7:123516807	1.0	1.0	0.0	NA	1	NA	NA	NA	NA	HYAL4_exon_chr7:123516807
1	TRPV1	0.0	4.3727	4.5922	1.0	NC	No	No	1	TRPV1_exon_chr17:3470281	1.0	1.0	0.0	NA	1	NA	NA	NA	NA	TRPV1_exon_chr17:3470281
1	PTCH2	3.9696	0.0	-4.5376	1.0	NC	No	No	1	PTCH2_exon_chr1:45286376	1.0	1.0	0.0	NA	1	NA	NA	NA	NA	PTCH2_exon_chr1:45286376
1	SPTLC2	48.5099	40.752	-0.2697	1.0	NC	No	No	1	SPTLC2_exon_chr14:77978746	1.0	1.0	0.0	NA	2	NA	NA	NA	NA	SPTLC2_exon_chr14:77978746
1	LOC339803	0.0	18.648	6.6813	0.2067	NC	No	No	1	LOC339803_exon_chr2:61371080	1.0	1.0	0.0	NA	2	NA	NA	NA	NA	LOC339803_exon_chr2:61371080
1	SNORA52	0.0	13.5032	6.2129	0.4458	NC	No	No	1	SNORA52_exon_chr11:811680	1.0	1.0	0.0	NA	1	NA	NA	NA	NA	SNORA52_exon_chr11:811680
1	ZMAT5	18.389	29.8744	0.6938	1.0	NC	No	No	1	ZMAT5_exon_chr22:30127343	1.0	1.0	0.0	NA	1	NA	NA	NA	NA	ZMAT5_exon_chr22:30127343
1	TEX264	12.8673	3.0223	-2.0869	0.9372	NC	No	No	1	TEX264_exon_chr3:51737739	1.0	1.0	0.0	NA	1	NA	NA	NA	NA	TEX264_exon_chr3:51737739
1	PTCHD4	25.2207	11.9606	-1.0555	1.0	NC	No	No	2	PTCHD4_exon_chr6:47847672	0.5496	0.2634	-0.2862	NA	1	NA	NA	NA	NA	PTCHD4_exon_chr6:47847672
2	PTCHD4									PTCHD4_exon_chr6:47869671	0.4504	0.7366	0.2862	NA	2	NA	NA	NA	NA	PTCHD4_exon_chr6:47869671
1	ZNF777	27.8506	35.9532	0.3777	1.0	NC	No	No	1	ZNF777_exon_chr7:149130023	1.0	1.0	0.0	NA	2	NA	NA	NA	NA	ZNF777_exon_chr7:149130023
1	MCRIP1	113.9703	106.3477	-0.1082	1.0	NC	No	No	1	MCRIP1_exon_chr17:79781187	1.0	1.0	0.0	NA	1	NA	NA	NA	NA	MCRIP1_exon_chr17:79781187
1	ZBTB7B	41.6537	70.3611	0.7698	1.0	NC	No	No	1	ZBTB7B_exon_chr1:154988695	1.0	1.0	0.0	NA	2	NA	NA	NA	NA	ZBTB7B_exon_chr1:154988695
1	SCARB2	52.4745	30.8426	-0.7748	1.0	NC	No	No	1	SCARB2_exon_chr4:77082904	1.0	1.0	0.0	NA	2	0.759	0.866	0.107	NA	SCARB2_exon_chr4:77082904
1	KIF26A	23.2805	24.2228	0.0737	1.0	NC	No	No	1	KIF26A_exon_chr14:104645945	1.0	1.0	0.0	NA	1	NA	NA	NA	NA	KIF26A_exon_chr14:104645945
1	SIPA1L3	5.7093	24.8191	2.0786	0.8155	NC	No	No	1	SIPA1L3_exon_chr19:38696736	1.0	1.0	0.0	NA	1	NA	NA	NA	NA	SIPA1L3_exon_chr19:38696736
1	TNFRSF21	78.736	76.7427	-0.0514	1.0	NC	No	No	1	TNFRSF21_exon_chr6:47200730	1.0	1.0	0.0	NA	1	NA	NA	NA	NA	TNFRSF21_exon_chr6:47200730
1	YLPM1	39.0491	48.7349	0.3026	1.0	NC	No	No	2	YLPM1_exon_chr14:75283273	0.0339	0.112	0.0781	NA	1	NA	NA	NA	NA	YLPM1_exon_chr14:75283273
2	YLPM1									YLPM1_exon_chr14:75302477	0.9661	0.888	-0.0781	NA	1	NA	NA	NA	NA	YLPM1_exon_chr14:75302477
1	ZSCAN26	12.1495	9.2594	-0.4038	1.0	NC	No	No	1	ZSCAN26_exon_chr6:28243971	1.0	1.0	0.0	NA	1	NA	NA	NA	NA	ZSCAN26_exon_chr6:28243971
1	ERCC3	90.8618	65.0809	-0.4799	1.0	NC	No	No	1	ERCC3_exon_chr2:128015303	1.0	1.0	0.0	NA	1	NA	NA	NA	NA	ERCC3_exon_chr2:128015303
1	TMEM41B	408.613	267.427	-0.6193	0.2369	NC	No	No	1	TMEM41B_exon_chr11:9305140	1.0	1.0	0.0	NA	3	0.7884	0.755	-0.0334	NA	TMEM41B_exon_chr11:9305140
1	NCAPD3	38.2826	53.5165	0.4853	1.0	NC	No	No	1	NCAPD3_exon_chr11:134022947	1.0	1.0	0.0	NA	1	NA	NA	NA	NA	NCAPD3_exon_chr11:134022947
1	TOGARAM1	25.264	29.7778	0.252	1.0	NC	No	No	1	TOGARAM1_exon_chr14:45542498	1.0	1.0	0.0	NA	2	NA	NA	NA	NA	TOGARAM1_exon_chr14:45542498
1	SEPTIN14	0.0	14.7412	6.337	0.3611	NC	No	No	1	SEPTIN14_exon_chr7:55863785	1.0	1.0	0.0	NA	1	NA	NA	NA	NA	SEPTIN14_exon_chr7:55863785
1	C2orf27A	1.5437	0.0	-3.196	1.0	NC	No	No	1	C2orf27A_exon_chr2:132454441	1.0	1.0	0.0	NA	1	NA	NA	NA	NA	C2orf27A_exon_chr2:132454441
1	DDX19B	71.2994	38.2659	-0.8806	1.0	NC	No	No	2	DDX19B_exon_chr16:70366870	0.1215	0.1494	0.028	NA	1	NA	NA	NA	NA	DDX19B_exon_chr16:70366870
2	DDX19B									DDX19B_exon_chr16:70367423	0.8785	0.8506	-0.028	NA	1	NA	NA	NA	NA	DDX19B_exon_chr16:70367423
1	TOPORS	186.0656	194.8089	0.0598	1.0	NC	No	No	1	TOPORS_exon_chr9:32544324	1.0	1.0	0.0	NA	6	0.8206	0.8018	-0.0187	NA	TOPORS_exon_chr9:32544324
1	EVI5L	109.9278	54.1925	-1.007	1.0	NC	No	No	1	EVI5L_exon_chr19:7928309	1.0	1.0	0.0	NA	1	NA	NA	NA	NA	EVI5L_exon_chr19:7928309
1	ASXL3	0.0	1.6262	3.1549	1.0	NC	No	No	1	ASXL3_exon_chr18:31322851	1.0	1.0	0.0	NA	1	NA	NA	NA	NA	ASXL3_exon_chr18:31322851
1	CCT6P1	0.0	9.5171	5.7117	1.0	NC	No	No	1	CCT6P1_exon_chr7:65228267	1.0	1.0	0.0	NA	1	NA	NA	NA	NA	CCT6P1_exon_chr7:65228267
1	LNP1	3.1637	6.9447	1.188	1.0	NC	No	No	1	LNP1_exon_chr3:100174620	1.0	1.0	0.0	NA	2	NA	NA	NA	NA	LNP1_exon_chr3:100174620
1	GOLGA8A	77.1772	57.8738	-0.4266	1.0	NC	No	No	2	GOLGA8A_exon_chr15:34673814	0.8239	0.3509	-0.4731	NA	3	NA	NA	NA	NA	GOLGA8A_exon_chr15:34673814
2	GOLGA8A									GOLGA8A_exon_chr15:34677539	0.1761	0.6491	0.4731	NA	1	NA	NA	NA	NA	GOLGA8A_exon_chr15:34677539
1	LINC02323	2.4388	13.4026	2.4244	0.9352	NC	No	No	1	LINC02323_exon_chr14:103021046	1.0	1.0	0.0	NA	1	NA	NA	NA	NA	LINC02323_exon_chr14:103021046
1	FTO-IT1	9.9719	4.1796	-1.2414	1.0	NC	No	No	1	FTO-IT1_exon_chr16:54073457	1.0	1.0	0.0	NA	1	NA	NA	NA	NA	FTO-IT1_exon_chr16:54073457
1	RASGRP2	43.1169	32.3673	-0.3989	1.0	NC	No	No	1	RASGRP2_exon_chr11:64494603	1.0	1.0	0.0	NA	1	NA	NA	NA	NA	RASGRP2_exon_chr11:64494603
1	LRRC41	17.141	41.4235	1.2531	1.0	NC	No	No	1	LRRC41_exon_chr1:46744756	1.0	1.0	0.0	NA	1	NA	NA	NA	NA	LRRC41_exon_chr1:46744756
1	GAS5	854.1551	653.8777	-0.3876	0.2067	NC	No	No	1	GAS5_exon_chr1:173833583	1.0	1.0	0.0	NA	1	NA	NA	NA	NA	GAS5_exon_chr1:173833583
1	RTRAF	1495.5086	1361.6021	-0.133	0.7767	NC	No	No	1	RTRAF_exon_chr14:52471079	1.0	1.0	0.0	NA	1	NA	NA	NA	NA	RTRAF_exon_chr14:52471079
1	KCNK5	8.6546	16.2146	0.9331	1.0	NC	No	No	1	KCNK5_exon_chr6:39159531	1.0	1.0	0.0	NA	1	NA	NA	NA	NA	KCNK5_exon_chr6:39159531
1	PLAUR	4.6067	6.4301	0.4691	1.0	NC	No	No	2	PLAUR_exon_chr19:44150700	1.0	0.0	-1.0	NA	1	NA	NA	NA	NA	PLAUR_exon_chr19:44150700
2	PLAUR									PLAUR_exon_chr19:44153295	0.0	1.0	1.0	NA	1	NA	NA	NA	NA	PLAUR_exon_chr19:44153295
1	ZNF761	61.7127	53.3147	-0.2031	1.0	NC	No	No	2	ZNF761_exon_chr19:53953132	0.3949	0.0784	-0.3165	NA	1	NA	NA	NA	NA	ZNF761_exon_chr19:53953132
2	ZNF761									ZNF761_exon_chr19:53957903	0.6051	0.9216	0.3165	NA	1	NA	NA	NA	NA	ZNF761_exon_chr19:53957903
1	CTAGE9	9.9719	6.5168	-0.5883	1.0	NC	No	No	1	CTAGE9_exon_chr6:132032157	1.0	1.0	0.0	NA	1	NA	NA	NA	NA	CTAGE9_exon_chr6:132032157
1	MYBL2	176.1387	177.7667	0.0265	1.0	NC	No	No	1	MYBL2_exon_chr20:42344598	1.0	1.0	0.0	NA	1	NA	NA	NA	NA	MYBL2_exon_chr20:42344598
1	FAAP20	78.3285	72.0739	-0.1062	1.0	NC	No	No	3	FAAP20_exon_chr1:2116952	0.1111	0.1599	0.0488	NA	2	NA	NA	NA	NA	FAAP20_exon_chr1:2116952
2	FAAP20									FAAP20_exon_chr1:2121220	0.7479	0.7297	-0.0181	NA	1	NA	NA	NA	NA	FAAP20_exon_chr1:2121220
3	FAAP20									FAAP20_exon_chr1:2124414	0.141	0.1103	-0.0307	NA	1	NA	NA	NA	NA	FAAP20_exon_chr1:2124414
1	PKD2	10.8056	11.5742	0.1177	1.0	NC	No	No	1	PKD2_exon_chr4:88996609	1.0	1.0	0.0	NA	1	NA	NA	NA	NA	PKD2_exon_chr4:88996609
1	ZFYVE21	233.067	199.612	-0.2331	1.0	NC	No	No	1	ZFYVE21_exon_chr14:104199319	1.0	1.0	0.0	NA	1	NA	NA	NA	NA	ZFYVE21_exon_chr14:104199319
1	SHROOM2	12.7722	28.5846	1.1302	1.0	NC	No	No	1	SHROOM2_exon_chrX:9914710	1.0	1.0	0.0	NA	2	NA	NA	NA	NA	SHROOM2_exon_chrX:9914710
1	APOBEC3C	5.1731	16.7209	1.6463	0.969	NC	No	No	1	APOBEC3C_exon_chr22:39414273	1.0	1.0	0.0	NA	3	NA	NA	NA	NA	APOBEC3C_exon_chr22:39414273
1	ARAF	70.0505	71.7419	0.0281	1.0	NC	No	No	2	ARAF_exon_chrX:47424641	0.364	0.1342	-0.2297	NA	1	NA	NA	NA	NA	ARAF_exon_chrX:47424641
2	ARAF									ARAF_exon_chrX:47430721	0.636	0.8658	0.2297	NA	1	NA	NA	NA	NA	ARAF_exon_chrX:47430721
1	FAHD2B	21.2811	5.6588	-1.9007	0.9022	NC	No	No	1	FAHD2B_exon_chr2:97749554	1.0	1.0	0.0	NA	1	NA	NA	NA	NA	FAHD2B_exon_chr2:97749554
1	PTENP1	2.3458	6.6148	1.4807	1.0	NC	No	No	1	PTENP1_exon_chr9:33677418	1.0	1.0	0.0	NA	1	NA	NA	NA	NA	PTENP1_exon_chr9:33677418
1	YWHAB	874.7871	819.2794	-0.0991	0.8817	NC	No	No	1	YWHAB_exon_chr20:43535022	1.0	1.0	0.0	NA	1	NA	NA	NA	NA	YWHAB_exon_chr20:43535022
1	LINC02210	11.8915	4.6299	-1.3568	0.9613	NC	No	No	1	LINC02210_exon_chr17:43713648	1.0	1.0	0.0	NA	1	NA	NA	NA	NA	LINC02210_exon_chr17:43713648
1	NATD1	86.3893	102.1442	0.2305	1.0	NC	No	No	1	NATD1_exon_chr17:21146742	1.0	1.0	0.0	NA	4	0.964	0.8423	-0.1217	NA	NATD1_exon_chr17:21146742
1	UCKL1	108.8223	94.3615	-0.22	1.0	NC	No	No	1	UCKL1_exon_chr20:62571408	1.0	1.0	0.0	NA	1	NA	NA	NA	NA	UCKL1_exon_chr20:62571408
1	B3GNTL1	26.2463	33.8697	0.3896	1.0	NC	No	No	1	B3GNTL1_exon_chr17:80901925	1.0	1.0	0.0	NA	2	0.1244	0.1796	0.0552	NA	B3GNTL1_exon_chr17:80901925
1	ARHGAP5	216.33	217.0955	0.0105	1.0	NC	No	No	2	ARHGAP5_exon_chr14:32559707	0.3548	0.3769	0.0221	NA	4	0.8442	0.9349	0.0907	NA	ARHGAP5_exon_chr14:32559707
2	ARHGAP5									ARHGAP5_exon_chr14:32623826	0.6452	0.6231	-0.0221	NA	10	0.5487	0.6738	0.1251	NA	ARHGAP5_exon_chr14:32623826
1	TARDBP	218.1918	309.9138	0.5038	0.5688	NC	No	No	2	TARDBP_exon_chr1:11073772	0.0389	0.0919	0.053	NA	1	NA	NA	NA	NA	TARDBP_exon_chr1:11073772
2	TARDBP									TARDBP_exon_chr1:11082180	0.9611	0.9081	-0.053	NA	5	0.2169	0.1001	-0.1168	NA	TARDBP_exon_chr1:11082180
1	KMT5B	94.5487	106.502	0.164	1.0	NC	No	No	1	KMT5B_exon_chr11:67934645	1.0	1.0	0.0	NA	3	0.7533	1.0	0.2467	NA	KMT5B_exon_chr11:67934645
1	EPB41L5	34.8116	18.3266	-0.9246	1.0	NC	No	No	1	EPB41L5_exon_chr2:120861635	1.0	1.0	0.0	NA	3	NA	NA	NA	NA	EPB41L5_exon_chr2:120861635
1	HMGXB3	57.4843	45.2975	-0.3396	1.0	NC	No	No	1	HMGXB3_exon_chr5:149431287	1.0	1.0	0.0	NA	1	NA	NA	NA	NA	HMGXB3_exon_chr5:149431287
1	ENTPD8	0.0	5.1441	4.8204	1.0	NC	No	No	1	ENTPD8_exon_chr9:140329557	1.0	1.0	0.0	NA	1	NA	NA	NA	NA	ENTPD8_exon_chr9:140329557
1	AOPEP	90.1397	90.4437	0.0261	1.0	NC	No	No	1	AOPEP_exon_chr9:97848963	1.0	1.0	0.0	NA	1	NA	NA	NA	NA	AOPEP_exon_chr9:97848963
1	NIPA1	45.2492	26.3338	-0.7656	1.0	NC	No	No	1	NIPA1_exon_chr15:23049340	1.0	1.0	0.0	NA	3	NA	NA	NA	NA	NIPA1_exon_chr15:23049340
1	LYST	24.7645	12.7916	-0.9607	1.0	NC	No	No	2	LYST_exon_chr1:235826378	0.5068	0.0402	-0.4666	NA	1	NA	NA	NA	NA	LYST_exon_chr1:235826378
2	LYST									LYST_exon_chr1:235992336	0.4932	0.9598	0.4666	NA	2	NA	NA	NA	NA	LYST_exon_chr1:235992336
1	ADAP2	32.3004	33.8109	0.0577	1.0	NC	No	No	1	ADAP2_exon_chr17:29284852	1.0	1.0	0.0	NA	4	NA	NA	NA	NA	ADAP2_exon_chr17:29284852
1	SMPD2	86.2689	39.6577	-1.1179	1.0	NC	No	No	1	SMPD2_exon_chr6:109764719	1.0	1.0	0.0	NA	1	NA	NA	NA	NA	SMPD2_exon_chr6:109764719
1	NUDT8	20.1304	22.8164	0.1584	1.0	NC	No	No	1	NUDT8_exon_chr11:67395871	1.0	1.0	0.0	NA	1	NA	NA	NA	NA	NUDT8_exon_chr11:67395871
1	NUP62CL	17.2043	23.0122	0.414	1.0	NC	No	No	1	NUP62CL_exon_chrX:106367562	1.0	1.0	0.0	NA	4	NA	NA	NA	NA	NUP62CL_exon_chrX:106367562
1	LANCL1	71.8187	50.4129	-0.494	1.0	NC	No	No	1	LANCL1_exon_chr2:211299287	1.0	1.0	0.0	NA	2	0.7653	0.9038	0.1385	NA	LANCL1_exon_chr2:211299287
1	MGRN1	70.0257	41.6575	-0.756	1.0	NC	No	No	1	MGRN1_exon_chr16:4736259	1.0	1.0	0.0	NA	1	NA	NA	NA	NA	MGRN1_exon_chr16:4736259
1	AGAP9	15.6578	15.4196	-0.0368	1.0	NC	No	No	1	AGAP9_exon_chr10:48235611	1.0	1.0	0.0	NA	1	NA	NA	NA	NA	AGAP9_exon_chr10:48235611
1	XPA	34.1121	56.4325	0.721	1.0	NC	No	No	2	XPA_exon_chr9:100437869	0.6056	0.2039	-0.4017	NA	2	NA	NA	NA	NA	XPA_exon_chr9:100437869
2	XPA									XPA_exon_chr9:100447322	0.3944	0.7961	0.4017	NA	1	NA	NA	NA	NA	XPA_exon_chr9:100447322
1	ADAMTS9	2.3429	0.3215	-2.7676	1.0	NC	No	No	1	ADAMTS9_exon_chr3:64502797	1.0	1.0	0.0	NA	1	NA	NA	NA	NA	ADAMTS9_exon_chr3:64502797
1	CREBZF	63.2268	100.581	0.6762	1.0	NC	No	No	1	CREBZF_exon_chr11:85376173	1.0	1.0	0.0	NA	4	0.3184	0.3119	-0.0065	NA	CREBZF_exon_chr11:85376173
1	ASNSD1	123.0412	100.0037	-0.3121	1.0	NC	No	No	1	ASNSD1_exon_chr2:190535166	1.0	1.0	0.0	NA	3	0.6558	0.5788	-0.077	NA	ASNSD1_exon_chr2:190535166
1	SHROOM1	15.3681	11.2871	-0.4517	1.0	NC	No	No	1	SHROOM1_exon_chr5:132158820	1.0	1.0	0.0	NA	1	NA	NA	NA	NA	SHROOM1_exon_chr5:132158820
1	RRM2B	162.2408	125.5277	-0.3753	1.0	NC	No	No	1	RRM2B_exon_chr8:103220513	1.0	1.0	0.0	NA	10	0.869	0.5923	-0.2767	NA	RRM2B_exon_chr8:103220513
1	QSOX1	130.1701	95.3935	-0.4485	1.0	NC	No	No	1	QSOX1_exon_chr1:180165396	1.0	1.0	0.0	NA	3	0.2295	0.1142	-0.1153	NA	QSOX1_exon_chr1:180165396
1	RND3	25.4466	11.2178	-1.1833	1.0	NC	No	No	1	RND3_exon_chr2:151326752	1.0	1.0	0.0	NA	2	NA	NA	NA	NA	RND3_exon_chr2:151326752
1	BUD13	62.8638	106.5752	0.7375	1.0	NC	No	No	1	BUD13_exon_chr11:116619291	1.0	1.0	0.0	NA	1	NA	NA	NA	NA	BUD13_exon_chr11:116619291
1	FAM214B	15.5051	5.916	-1.3616	0.9603	NC	No	No	1	FAM214B_exon_chr9:35105371	1.0	1.0	0.0	NA	1	NA	NA	NA	NA	FAM214B_exon_chr9:35105371
1	LINC02724	14.2726	1.6567	-3.0949	0.7134	NC	No	No	1	LINC02724_exon_chr11:64217368	1.0	1.0	0.0	NA	1	NA	NA	NA	NA	LINC02724_exon_chr11:64217368
1	TAS2R20	8.4043	4.5011	-0.8835	1.0	NC	No	No	1	TAS2R20_exon_chr12:11150903	1.0	1.0	0.0	NA	2	NA	NA	NA	NA	TAS2R20_exon_chr12:11150903
1	ARHGEF40	5.6906	4.8178	-0.2558	1.0	NC	No	No	1	ARHGEF40_exon_chr14:21557172	1.0	1.0	0.0	NA	1	NA	NA	NA	NA	ARHGEF40_exon_chr14:21557172
1	DUSP16	3.5285	12.8605	1.8306	0.9372	NC	No	No	1	DUSP16_exon_chr12:12630949	1.0	1.0	0.0	NA	2	NA	NA	NA	NA	DUSP16_exon_chr12:12630949
1	NF1	55.7515	51.9718	-0.1053	1.0	NC	No	No	1	NF1_exon_chr17:29701030	1.0	1.0	0.0	NA	1	NA	NA	NA	NA	NF1_exon_chr17:29701030
1	PVR	4.0647	0.0	-4.5662	1.0	NC	No	No	1	PVR_exon_chr19:45165006	1.0	1.0	0.0	NA	1	NA	NA	NA	NA	PVR_exon_chr19:45165006
1	WWC3	91.7361	23.7717	-1.953	0.3962	NC	No	No	2	WWC3_exon_chrX:10047764	0.194	0.0	-0.194	NA	1	NA	NA	NA	NA	WWC3_exon_chrX:10047764
2	WWC3									WWC3_exon_chrX:10109474	0.806	1.0	0.194	NA	3	0.9897	0.7991	-0.1906	NA	WWC3_exon_chrX:10109474
1	TMEM205	57.3861	34.6803	-0.7275	1.0	NC	No	No	1	TMEM205_exon_chr19:11453796	1.0	1.0	0.0	NA	1	NA	NA	NA	NA	TMEM205_exon_chr19:11453796
1	PPIP5K1	81.2263	24.3087	-1.7298	1.0	NC	No	No	1	PPIP5K1_exon_chr15:43827674	1.0	1.0	0.0	NA	1	NA	NA	NA	NA	PPIP5K1_exon_chr15:43827674
1	IKBKG	38.9138	53.8099	0.4628	1.0	NC	No	No	1	IKBKG_exon_chrX:153792533	1.0	1.0	0.0	NA	1	NA	NA	NA	NA	IKBKG_exon_chrX:153792533
1	PRKCE	0.0	2.315	3.6795	1.0	NC	No	No	1	PRKCE_exon_chr2:46411873	1.0	1.0	0.0	NA	1	NA	NA	NA	NA	PRKCE_exon_chr2:46411873
1	RCAN3	4.8272	26.5543	2.4184	0.7037	NC	No	No	1	RCAN3_exon_chr1:24861582	1.0	1.0	0.0	NA	3	NA	NA	NA	NA	RCAN3_exon_chr1:24861582
1	LINC02864	8.3802	3.3354	-1.3495	1.0	NC	No	No	1	LINC02864_exon_chr18:70826899	1.0	1.0	0.0	NA	1	NA	NA	NA	NA	LINC02864_exon_chr18:70826899
1	SPG21	159.8147	161.3541	0.0105	1.0	NC	No	No	1	SPG21_exon_chr15:65256077	1.0	1.0	0.0	NA	1	NA	NA	NA	NA	SPG21_exon_chr15:65256077
1	PTPN1	137.3059	116.7224	-0.236	1.0	NC	No	No	1	PTPN1_exon_chr20:49199228	1.0	1.0	0.0	NA	4	0.8578	0.8966	0.0388	NA	PTPN1_exon_chr20:49199228
1	HMGCS1	1943.5975	1789.3128	-0.1171	0.7767	NC	No	No	1	HMGCS1_exon_chr5:43291322	1.0	1.0	0.0	NA	5	0.9131	0.8933	-0.0198	NA	HMGCS1_exon_chr5:43291322
1	SMC2	962.7071	1480.3473	0.6251	0.0764	UP	No	No	3	SMC2_exon_chr9:106875596	0.0883	0.0912	0.0028	NA	1	NA	NA	NA	NA	SMC2_exon_chr9:106875596
2	SMC2									SMC2_exon_chr9:106887192	0.5275	0.5888	0.0613	NA	1	NA	NA	NA	NA	SMC2_exon_chr9:106887192
3	SMC2									SMC2_exon_chr9:106901419	0.2994	0.1699	-0.1296	NA	6	0.4129	0.3254	-0.0875	NA	SMC2_exon_chr9:106901419
1	KCTD13	9.3834	8.3444	-0.173	1.0	NC	No	No	1	KCTD13_exon_chr16:29918429	1.0	1.0	0.0	NA	1	NA	NA	NA	NA	KCTD13_exon_chr16:29918429
1	C1QTNF12	3.2518	0.0	-4.2465	1.0	NC	No	No	1	C1QTNF12_exon_chr1:1178026	1.0	1.0	0.0	NA	1	NA	NA	NA	NA	C1QTNF12_exon_chr1:1178026
1	GPHN	96.3664	66.9025	-0.504	1.0	NC	No	No	1	GPHN_exon_chr14:67647520	1.0	1.0	0.0	NA	1	NA	NA	NA	NA	GPHN_exon_chr14:67647520
1	SLFN12	5.7339	5.4656	-0.0844	1.0	NC	No	No	2	SLFN12_exon_chr17:33738946	0.0	1.0	1.0	NA	1	NA	NA	NA	NA	SLFN12_exon_chr17:33738946
2	SLFN12									SLFN12_exon_chr17:33750087	1.0	0.0	-1.0	NA	1	NA	NA	NA	NA	SLFN12_exon_chr17:33750087
1	KLHL26	3.1379	42.4609	3.6809	0.8561	NC	No	No	1	KLHL26_exon_chr19:18778210	1.0	1.0	0.0	NA	2	NA	NA	NA	NA	KLHL26_exon_chr19:18778210
1	RNF170	35.5638	20.2131	-0.8229	1.0	NC	No	No	1	RNF170_exon_chr8:42711571	1.0	1.0	0.0	NA	2	NA	NA	NA	NA	RNF170_exon_chr8:42711571
1	SLC11A2	263.0817	247.5509	-0.0927	1.0	NC	No	No	2	SLC11A2_exon_chr12:51375586	0.0349	0.083	0.0481	NA	2	0.8944	0.9678	0.0735	NA	SLC11A2_exon_chr12:51375586
2	SLC11A2									SLC11A2_exon_chr12:51382218	0.9651	0.917	-0.0481	NA	5	NA	NA	NA	NA	SLC11A2_exon_chr12:51382218
1	ITGB5	102.4432	113.1315	0.144	1.0	NC	No	No	1	ITGB5_exon_chr3:124482565	1.0	1.0	0.0	NA	3	0.2591	0.1025	-0.1566	NA	ITGB5_exon_chr3:124482565
1	ORC5	106.1613	74.147	-0.5322	1.0	NC	No	No	1	ORC5_exon_chr7:103767340	1.0	1.0	0.0	NA	1	NA	NA	NA	NA	ORC5_exon_chr7:103767340
1	ZNF622	169.035	150.8566	-0.1575	1.0	NC	No	No	1	ZNF622_exon_chr5:16451893	1.0	1.0	0.0	NA	1	NA	NA	NA	NA	ZNF622_exon_chr5:16451893
1	ADNP	147.9695	123.6924	-0.2585	1.0	NC	No	No	1	ADNP_exon_chr20:49511049	1.0	1.0	0.0	NA	2	0.3947	0.235	-0.1597	NA	ADNP_exon_chr20:49511049
1	NOP14-AS1	0.542	10.2239	4.0365	1.0	NC	No	No	1	NOP14-AS1_exon_chr4:2937272	1.0	1.0	0.0	NA	1	NA	NA	NA	NA	NOP14-AS1_exon_chr4:2937272
1	SRI	148.2592	162.5604	0.1172	1.0	NC	No	No	1	SRI_exon_chr7:87835819	1.0	1.0	0.0	NA	3	0.0882	0.0924	0.0042	NA	SRI_exon_chr7:87835819
1	SLC25A20	1.6259	11.8102	2.8187	0.9125	NC	No	No	1	SLC25A20_exon_chr3:48895205	1.0	1.0	0.0	NA	1	NA	NA	NA	NA	SLC25A20_exon_chr3:48895205
1	BCKDHB	38.2012	67.2328	0.8088	1.0	NC	No	No	1	BCKDHB_exon_chr6:81053380	1.0	1.0	0.0	NA	2	NA	NA	NA	NA	BCKDHB_exon_chr6:81053380
1	KEAP1	122.1855	52.7399	-1.2081	1.0	NC	No	No	1	KEAP1_exon_chr19:10597494	1.0	1.0	0.0	NA	1	NA	NA	NA	NA	KEAP1_exon_chr19:10597494
1	SEPTIN9	279.3359	148.1043	-0.9128	0.1449	NC	No	No	1	SEPTIN9_exon_chr17:75494604	1.0	1.0	0.0	NA	1	NA	NA	NA	NA	SEPTIN9_exon_chr17:75494604
1	SEC22C	31.4585	61.4638	0.9595	1.0	NC	No	No	1	SEC22C_exon_chr3:42594940	1.0	1.0	0.0	NA	2	NA	NA	NA	NA	SEC22C_exon_chr3:42594940
1	INTS6-AS1	14.4074	8.7895	-0.6955	1.0	NC	No	No	1	INTS6-AS1_exon_chr13:52028138	1.0	1.0	0.0	NA	1	NA	NA	NA	NA	INTS6-AS1_exon_chr13:52028138
1	THAP5	41.1233	37.6678	-0.142	1.0	NC	No	No	1	THAP5_exon_chr7:108205549	1.0	1.0	0.0	NA	2	0.6678	0.869	0.2012	NA	THAP5_exon_chr7:108205549
1	ATF6	48.8507	67.9644	0.4568	1.0	NC	No	No	1	ATF6_exon_chr1:161928235	1.0	1.0	0.0	NA	4	NA	NA	NA	NA	ATF6_exon_chr1:161928235
1	LOC102724532	9.5562	7.6133	-0.33	1.0	NC	No	No	1	LOC102724532_exon_chr17:45968947	1.0	1.0	0.0	NA	1	NA	NA	NA	NA	LOC102724532_exon_chr17:45968947
1	LSM10	31.9033	30.1786	-0.0514	1.0	NC	No	No	1	LSM10_exon_chr1:36859754	1.0	1.0	0.0	NA	1	NA	NA	NA	NA	LSM10_exon_chr1:36859754
1	RHBDL1	0.0	19.2713	6.724	0.3055	NC	No	No	1	RHBDL1_exon_chr16:727780	1.0	1.0	0.0	NA	1	NA	NA	NA	NA	RHBDL1_exon_chr16:727780
1	C17orf80	20.099	41.2939	1.0561	1.0	NC	No	No	1	C17orf80_exon_chr17:71243379	1.0	1.0	0.0	NA	2	NA	NA	NA	NA	C17orf80_exon_chr17:71243379
1	TPGS2	77.5674	101.0876	0.3792	1.0	NC	No	No	3	TPGS2_exon_chr18:34360151	0.0596	0.0532	-0.0064	NA	3	0.9554	0.7106	-0.2448	NA	TPGS2_exon_chr18:34360151
2	TPGS2									TPGS2_exon_chr18:34367042	0.2974	0.2807	-0.0167	NA	1	NA	NA	NA	NA	TPGS2_exon_chr18:34367042
3	TPGS2									TPGS2_exon_chr18:34377013	0.643	0.6661	0.0231	NA	1	NA	NA	NA	NA	TPGS2_exon_chr18:34377013
1	RPS20	6274.9983	5349.4482	-0.231	0.4809	NC	No	No	1	RPS20_exon_chr8:56985831	1.0	1.0	0.0	NA	1	NA	NA	NA	NA	RPS20_exon_chr8:56985831
1	SPNS1	491.7892	370.0416	-0.4067	0.8152	NC	No	No	1	SPNS1_exon_chr16:28995525	1.0	1.0	0.0	NA	1	NA	NA	NA	NA	SPNS1_exon_chr16:28995525
1	CEP350	86.7304	79.8227	-0.1048	1.0	NC	No	No	3	CEP350_exon_chr1:179981063	0.0759	0.2087	0.1327	NA	1	NA	NA	NA	NA	CEP350_exon_chr1:179981063
2	CEP350									CEP350_exon_chr1:180044156	0.3614	0.2437	-0.1177	NA	2	NA	NA	NA	NA	CEP350_exon_chr1:180044156
3	CEP350									CEP350_exon_chr1:180080131	0.5627	0.4953	-0.0673	NA	2	NA	NA	NA	NA	CEP350_exon_chr1:180080131
1	BOLA2-SMG1P6	108.6377	62.9599	-0.7938	1.0	NC	No	No	1	BOLA2-SMG1P6_exon_chr16:29455009	1.0	1.0	0.0	NA	1	NA	NA	NA	NA	BOLA2-SMG1P6_exon_chr16:29455009
1	MTFMT	68.5801	22.2682	-1.6296	1.0	NC	No	No	1	MTFMT_exon_chr15:65295594	1.0	1.0	0.0	NA	2	NA	NA	NA	NA	MTFMT_exon_chr15:65295594
1	MINDY3	21.6605	35.8609	0.7083	1.0	NC	No	No	1	MINDY3_exon_chr10:15821140	1.0	1.0	0.0	NA	2	NA	NA	NA	NA	MINDY3_exon_chr10:15821140
1	ITGA1	4.8025	0.0	-4.7763	1.0	NC	No	No	1	ITGA1_exon_chr5:52248236	1.0	1.0	0.0	NA	1	NA	NA	NA	NA	ITGA1_exon_chr5:52248236
1	METAP2	228.0863	366.5374	0.6722	0.322	NC	No	Yes	2	METAP2_exon_chr12:95869846	0.3735	0.6623	0.2888	NA	4	0.2861	0.0042	-0.282	Shortening	METAP2_exon_chr12:95869846
2	METAP2									METAP2_exon_chr12:95907427	0.6229	0.3088	-0.3141	NA	1	NA	NA	NA	NA	METAP2_exon_chr12:95907427
1	AQR	95.1778	45.9394	-1.0403	1.0	NC	No	No	1	AQR_exon_chr15:35149307	1.0	1.0	0.0	NA	5	0.1012	0.0344	-0.0668	NA	AQR_exon_chr15:35149307
1	TAF7	495.3772	657.7169	0.4072	0.8277	NC	No	No	1	TAF7_exon_chr5:140700351	1.0	1.0	0.0	NA	7	0.9143	0.8775	-0.0368	NA	TAF7_exon_chr5:140700351
1	HSD17B7	111.1456	130.018	0.232	1.0	NC	No	No	2	HSD17B7_exon_chr1:162767591	0.0	0.1111	0.1111	NA	1	NA	NA	NA	NA	HSD17B7_exon_chr1:162767591
2	HSD17B7									HSD17B7_exon_chr1:162782087	1.0	0.8889	-0.1111	NA	1	NA	NA	NA	NA	HSD17B7_exon_chr1:162782087
1	DHRS2	10.2052	9.2735	-0.116	1.0	NC	No	No	1	DHRS2_exon_chr14:24114350	1.0	1.0	0.0	NA	1	NA	NA	NA	NA	DHRS2_exon_chr14:24114350
1	PNRC1	112.4742	140.4787	0.3196	1.0	NC	No	No	1	PNRC1_exon_chr6:89793471	1.0	1.0	0.0	NA	4	0.0452	0.0573	0.0121	NA	PNRC1_exon_chr6:89793471
1	SNAP47	9.1312	18.2722	0.9761	0.9388	NC	No	No	1	SNAP47_exon_chr1:227968227	1.0	1.0	0.0	NA	1	NA	NA	NA	NA	SNAP47_exon_chr1:227968227
1	CDC14A	5.7114	0.0	-5.0404	1.0	NC	No	No	1	CDC14A_exon_chr1:100983806	1.0	1.0	0.0	NA	1	NA	NA	NA	NA	CDC14A_exon_chr1:100983806
1	ZNF318	14.6843	12.346	-0.2231	1.0	NC	No	No	1	ZNF318_exon_chr6:43308240	1.0	1.0	0.0	NA	2	NA	NA	NA	NA	ZNF318_exon_chr6:43308240
1	MSH2	229.2222	146.1492	-0.6505	0.4696	NC	No	Yes	1	MSH2_exon_chr2:47709917	1.0	1.0	0.0	NA	3	0.6416	0.776	0.1344	Lengthening	MSH2_exon_chr2:47709917
1	TEX37	5.3058	19.6377	1.8414	0.7864	NC	No	No	1	TEX37_exon_chr2:88828569	1.0	1.0	0.0	NA	1	NA	NA	NA	NA	TEX37_exon_chr2:88828569
1	MIR6748	62.2737	45.8571	-0.4401	1.0	NC	No	No	1	MIR6748_exon_chr11:62557286	1.0	1.0	0.0	NA	2	0.2623	0.0645	-0.1978	NA	MIR6748_exon_chr11:62557286
1	LOC730202	39.8697	22.6706	-0.7963	1.0	NC	No	No	1	LOC730202_exon_chr14:96968663	1.0	1.0	0.0	NA	1	NA	NA	NA	NA	LOC730202_exon_chr14:96968663
1	MXRA8	615.2522	566.23	-0.1193	0.8561	NC	No	No	1	MXRA8_exon_chr1:1289009	1.0	1.0	0.0	NA	1	NA	NA	NA	NA	MXRA8_exon_chr1:1289009
1	MSANTD3	106.4882	66.5277	-0.6729	1.0	NC	No	No	1	MSANTD3_exon_chr9:103212838	1.0	1.0	0.0	NA	4	0.4182	0.3507	-0.0676	NA	MSANTD3_exon_chr9:103212838
1	PPP1R15B	667.9482	470.2855	-0.5066	0.2158	NC	No	No	1	PPP1R15B_exon_chr1:204375441	1.0	1.0	0.0	NA	7	0.7194	0.7569	0.0375	NA	PPP1R15B_exon_chr1:204375441
1	SFPQ	1369.061	1533.1816	0.163	0.7516	NC	No	No	3	SFPQ_exon_chr1:35642075	0.1256	0.1625	0.0369	NA	5	0.78	0.6632	-0.1168	NA	SFPQ_exon_chr1:35642075
2	SFPQ									SFPQ_exon_chr1:35650194	0.6465	0.5053	-0.1412	NA	1	NA	NA	NA	NA	SFPQ_exon_chr1:35650194
3	SFPQ									SFPQ_exon_chr1:35654983	0.2152	0.3038	0.0887	NA	1	NA	NA	NA	NA	SFPQ_exon_chr1:35654983
1	NAPG	85.0781	71.5374	-0.2568	1.0	NC	No	No	1	NAPG_exon_chr18:10550073	1.0	1.0	0.0	NA	5	0.6195	0.7824	0.1629	NA	NAPG_exon_chr18:10550073
1	FAM169A	62.967	41.836	-0.5945	1.0	NC	No	No	1	FAM169A_exon_chr5:74077833	1.0	1.0	0.0	NA	4	0.859	0.8345	-0.0245	NA	FAM169A_exon_chr5:74077833
1	LZIC	258.9642	258.3178	-0.0097	1.0	NC	No	No	1	LZIC_exon_chr1:9990515	1.0	1.0	0.0	NA	8	0.4315	0.2414	-0.19	NA	LZIC_exon_chr1:9990515
1	LSM1	228.2494	186.8594	-0.2943	1.0	NC	No	No	1	LSM1_exon_chr8:38021358	1.0	1.0	0.0	NA	1	NA	NA	NA	NA	LSM1_exon_chr8:38021358
1	WSB2	111.805	153.8361	0.4524	0.9378	NC	No	No	1	WSB2_exon_chr12:118472163	1.0	1.0	0.0	NA	5	0.8446	0.7792	-0.0654	NA	WSB2_exon_chr12:118472163
1	ENC1	91.2026	64.0142	-0.5171	1.0	NC	No	No	1	ENC1_exon_chr5:73925817	1.0	1.0	0.0	NA	1	NA	NA	NA	NA	ENC1_exon_chr5:73925817
1	ATP6V1H	89.7746	148.6984	0.7114	1.0	NC	No	No	1	ATP6V1H_exon_chr8:54628584	1.0	1.0	0.0	NA	1	NA	NA	NA	NA	ATP6V1H_exon_chr8:54628584
1	LINC01138	9.1965	0.0	-5.7276	1.0	NC	No	No	1	LINC01138_exon_chr1:143718868	1.0	1.0	0.0	NA	1	NA	NA	NA	NA	LINC01138_exon_chr1:143718868
1	TMEM132A	76.767	42.425	-0.8563	1.0	NC	No	No	2	TMEM132A_exon_chr11:60699157	0.0957	0.0	-0.0957	NA	1	NA	NA	NA	NA	TMEM132A_exon_chr11:60699157
2	TMEM132A									TMEM132A_exon_chr11:60703335	0.9043	1.0	0.0957	NA	1	NA	NA	NA	NA	TMEM132A_exon_chr11:60703335
1	KIAA2013	250.1535	264.3821	0.0725	1.0	NC	No	No	1	KIAA2013_exon_chr1:11980389	1.0	1.0	0.0	NA	2	0.3247	0.5169	0.1922	NA	KIAA2013_exon_chr1:11980389
1	GLRX2	58.5999	55.2704	-0.0771	1.0	NC	No	No	1	GLRX2_exon_chr1:193065889	1.0	1.0	0.0	NA	1	NA	NA	NA	NA	GLRX2_exon_chr1:193065889
1	HMGN5	30.7858	123.6468	1.9674	0.5971	NC	No	Yes	2	HMGN5_exon_chrX:80370729	1.0	0.934	-0.066	NA	5	NA	NA	NA	Both	HMGN5_exon_chrX:80370729
2	HMGN5									HMGN5_exon_chrX:80371840	0.0	0.066	0.066	NA	1	NA	NA	NA	NA	HMGN5_exon_chrX:80371840
1	PKM	2318.0582	2364.0897	0.0299	0.9265	NC	No	No	1	PKM_exon_chr15:72492097	1.0	1.0	0.0	NA	1	NA	NA	NA	NA	PKM_exon_chr15:72492097
1	KIF13A	9.1174	34.308	1.9027	0.9117	NC	No	No	3	KIF13A_exon_chr6:17761108	0.1966	0.5547	0.3581	NA	2	NA	NA	NA	NA	KIF13A_exon_chr6:17761108
2	KIF13A									KIF13A_exon_chr6:17765177	0.7737	0.2162	-0.5575	NA	1	NA	NA	NA	NA	KIF13A_exon_chr6:17765177
3	KIF13A									KIF13A_exon_chr6:17951660	0.0298	0.2291	0.1993	NA	2	NA	NA	NA	NA	KIF13A_exon_chr6:17951660
1	C9orf64	32.1898	40.5218	0.3424	1.0	NC	No	No	1	C9orf64_exon_chr9:86554658	1.0	1.0	0.0	NA	1	NA	NA	NA	NA	C9orf64_exon_chr9:86554658
1	POLE	28.3122	79.6499	1.4828	1.0	NC	No	No	1	POLE_exon_chr12:133201396	1.0	1.0	0.0	NA	1	NA	NA	NA	NA	POLE_exon_chr12:133201396
1	NRP1	16.2455	0.0	-6.5542	0.3186	NC	No	No	1	NRP1_exon_chr10:33486637	1.0	1.0	0.0	NA	1	NA	NA	NA	NA	NRP1_exon_chr10:33486637
1	NME3	2.4576	5.8093	1.2021	1.0	NC	No	No	1	NME3_exon_chr16:1820767	1.0	1.0	0.0	NA	1	NA	NA	NA	NA	NME3_exon_chr16:1820767
1	C16orf86	0.0	2.315	3.6795	1.0	NC	No	No	1	C16orf86_exon_chr16:67702102	1.0	1.0	0.0	NA	1	NA	NA	NA	NA	C16orf86_exon_chr16:67702102
1	ZNF195	83.9477	74.6268	-0.1617	1.0	NC	No	No	1	ZNF195_exon_chr11:3381795	1.0	1.0	0.0	NA	5	0.742	0.6386	-0.1033	NA	ZNF195_exon_chr11:3381795
1	TIMM9	261.8226	236.7879	-0.1432	1.0	NC	No	No	1	TIMM9_exon_chr14:58875886	1.0	1.0	0.0	NA	3	0.2475	0.3563	0.1088	NA	TIMM9_exon_chr14:58875886
1	MDH2	775.1769	803.6988	0.0563	0.9125	NC	No	No	1	MDH2_exon_chr7:75695596	1.0	1.0	0.0	NA	3	0.079	0.0501	-0.0289	NA	MDH2_exon_chr7:75695596
1	LSM14A	674.2146	788.9833	0.2232	0.7676	NC	No	No	2	LSM14A_exon_chr19:34710295	0.0429	0.1246	0.0817	NA	1	NA	NA	NA	NA	LSM14A_exon_chr19:34710295
2	LSM14A									LSM14A_exon_chr19:34718269	0.9571	0.8754	-0.0817	NA	5	0.4842	0.5304	0.0462	NA	LSM14A_exon_chr19:34718269
1	SAV1	28.2483	24.0968	-0.239137614213777	NA	NC	No	No	1	SAV1_exon_chr14:51102102	1.0	1.0	0.0	NA	1	NA	NA	NA	NA	SAV1_exon_chr14:51102102
1	RNF145	80.5001	56.8135	-0.5022	1.0	NC	No	No	2	RNF145_exon_chr5:158586043	0.9425	0.8931	-0.0494	NA	1	NA	NA	NA	NA	RNF145_exon_chr5:158586043
2	RNF145									RNF145_exon_chr5:158603875	0.0575	0.1069	0.0494	NA	1	NA	NA	NA	NA	RNF145_exon_chr5:158603875
1	RRP15	96.3003	136.4882	0.5082	1.0	NC	No	No	1	RRP15_exon_chr1:218504289	1.0	1.0	0.0	NA	4	0.4817	0.3741	-0.1076	NA	RRP15_exon_chr1:218504289
1	PGP	491.6591	498.6877	0.0224	0.9352	NC	No	No	1	PGP_exon_chr16:2264054	1.0	1.0	0.0	NA	2	0.079	0.1634	0.0844	NA	PGP_exon_chr16:2264054
1	ACAA2	100.2351	114.2863	0.2092	1.0	NC	No	No	1	ACAA2_exon_chr18:47310301	1.0	1.0	0.0	NA	1	NA	NA	NA	NA	ACAA2_exon_chr18:47310301
1	TTLL5	19.5666	41.6561	1.0826	1.0	NC	No	No	1	TTLL5_exon_chr14:76420766	1.0	1.0	0.0	NA	2	NA	NA	NA	NA	TTLL5_exon_chr14:76420766
1	SERPINE2	13.1484	0.0	-6.2373	0.3527	NC	No	No	1	SERPINE2_exon_chr2:224840621	1.0	1.0	0.0	NA	1	NA	NA	NA	NA	SERPINE2_exon_chr2:224840621
1	MTX1	233.3619	226.1711	-0.0351	1.0	NC	No	No	1	MTX1_exon_chr1:155183274	1.0	1.0	0.0	NA	1	NA	NA	NA	NA	MTX1_exon_chr1:155183274
1	CEP55	113.6765	83.5044	-0.4527	1.0	NC	No	No	1	CEP55_exon_chr10:95287706	1.0	1.0	0.0	NA	3	0.8629	0.8588	-0.0041	NA	CEP55_exon_chr10:95287706
1	NAP1L1	1317.5852	1703.7668	0.3682	0.1445	NC	No	No	1	NAP1L1_exon_chr12:76443305	1.0	1.0	0.0	NA	9	0.9088	0.9249	0.016	NA	NAP1L1_exon_chr12:76443305
1	TFPT	16.513	40.0831	1.2857	1.0	NC	No	No	1	TFPT_exon_chr19:54610476	1.0	1.0	0.0	NA	1	NA	NA	NA	NA	TFPT_exon_chr19:54610476
1	TRAF3IP2	5.924	25.4713	2.1173	0.8197	NC	No	No	1	TRAF3IP2_exon_chr6:111880754	1.0	1.0	0.0	NA	1	NA	NA	NA	NA	TRAF3IP2_exon_chr6:111880754
1	H2AC17	6.3263	10.0451	0.6417	1.0	NC	No	No	1	H2AC17_exon_chr6:27860963	1.0	1.0	0.0	NA	1	NA	NA	NA	NA	H2AC17_exon_chr6:27860963
1	BMS1	154.0897	108.9033	-0.4996	1.0	NC	No	No	3	BMS1_exon_chr10:43291921	0.167	0.0425	-0.1245	NA	1	NA	NA	NA	NA	BMS1_exon_chr10:43291921
2	BMS1									BMS1_exon_chr10:43312765	0.1431	0.0703	-0.0728	NA	1	NA	NA	NA	NA	BMS1_exon_chr10:43312765
3	BMS1									BMS1_exon_chr10:43326313	0.6713	0.8375	0.1663	NA	1	NA	NA	NA	NA	BMS1_exon_chr10:43326313
1	TPCN2	89.5001	72.934	-0.2895	1.0	NC	No	No	1	TPCN2_exon_chr11:68855342	1.0	1.0	0.0	NA	6	0.1348	0.4156	0.2808	NA	TPCN2_exon_chr11:68855342
1	ERF	203.5265	345.7235	0.7649	0.3017	NC	No	No	1	ERF_exon_chr19:42753890	1.0	1.0	0.0	NA	1	NA	NA	NA	NA	ERF_exon_chr19:42753890
1	SRPK1	203.3703	104.4061	-0.9594	0.2221	NC	No	No	2	SRPK1_exon_chr6:35803265	0.8852	0.8993	0.0141	NA	4	0.9019	0.9603	0.0585	NA	SRPK1_exon_chr6:35803265
2	SRPK1									SRPK1_exon_chr6:35838271	0.1148	0.1007	-0.0141	NA	1	NA	NA	NA	NA	SRPK1_exon_chr6:35838271
1	SYNGR2	51.3649	40.3263	-0.3616	1.0	NC	No	No	1	SYNGR2_exon_chr17:76167590	1.0	1.0	0.0	NA	1	NA	NA	NA	NA	SYNGR2_exon_chr17:76167590
1	ZNF317	31.7126	14.9493	-1.0857	1.0	NC	No	No	1	ZNF317_exon_chr19:9270789	1.0	1.0	0.0	NA	2	NA	NA	NA	NA	ZNF317_exon_chr19:9270789
1	KLF5	156.9002	158.2492	0.0152	1.0	NC	No	No	1	KLF5_exon_chr13:73649845	1.0	1.0	0.0	NA	1	NA	NA	NA	NA	KLF5_exon_chr13:73649845
1	KRIT1	52.4115	30.2672	-0.7932	1.0	NC	No	No	1	KRIT1_exon_chr7:91830118	1.0	1.0	0.0	NA	3	0.4095	0.4072	-0.0024	NA	KRIT1_exon_chr7:91830118
1	MINPP1	16.6866	3.8583	-2.0949	0.8605	NC	No	No	1	MINPP1_exon_chr10:89311838	1.0	1.0	0.0	NA	1	NA	NA	NA	NA	MINPP1_exon_chr10:89311838
1	DYM	190.8025	186.7664	-0.0272	1.0	NC	No	No	1	DYM_exon_chr18:46570574	1.0	1.0	0.0	NA	1	NA	NA	NA	NA	DYM_exon_chr18:46570574
1	TCEAL9	1338.9129	1674.0841	0.3259	0.381	NC	No	Yes	1	TCEAL9_exon_chrX:102612542	1.0	1.0	0.0	NA	6	0.6723	0.4852	-0.1871	Shortening	TCEAL9_exon_chrX:102612542
1	ARHGEF18	32.4668	52.2817	0.6894	1.0	NC	No	No	1	ARHGEF18_exon_chr19:7535011	1.0	1.0	0.0	NA	1	NA	NA	NA	NA	ARHGEF18_exon_chr19:7535011
1	TMPRSS13	87.7396	96.4873	0.1499	1.0	NC	No	No	3	TMPRSS13_exon_chr11:117772980	0.3289	0.292	-0.0369	NA	1	NA	NA	NA	NA	TMPRSS13_exon_chr11:117772980
2	TMPRSS13									TMPRSS13_exon_chr11:117774166	0.1811	0.0053	-0.1757	NA	1	NA	NA	NA	NA	TMPRSS13_exon_chr11:117774166
3	TMPRSS13									TMPRSS13_exon_chr11:117779499	0.49	0.7027	0.2127	NA	2	0.9584	0.8146	-0.1438	NA	TMPRSS13_exon_chr11:117779499
1	ZNF684	9.9252	0.0	-5.8412	1.0	NC	No	No	1	ZNF684_exon_chr1:41012233	1.0	1.0	0.0	NA	1	NA	NA	NA	NA	ZNF684_exon_chr1:41012233
1	EGLN1	50.648	84.1813	0.7367	1.0	NC	No	No	1	EGLN1_exon_chr1:231502221	1.0	1.0	0.0	NA	3	0.864	0.8935	0.0295	NA	EGLN1_exon_chr1:231502221
1	MAT2A	323.4195	397.8428	0.292	0.5992	NC	No	No	1	MAT2A_exon_chr2:85770792	1.0	1.0	0.0	NA	6	0.6356	0.6043	-0.0313	NA	MAT2A_exon_chr2:85770792
1	ZBED5	104.9584	98.4991	-0.089	1.0	NC	No	No	1	ZBED5_exon_chr11:10876665	1.0	1.0	0.0	NA	1	NA	NA	NA	NA	ZBED5_exon_chr11:10876665
1	BAG4	30.1705	44.0081	0.556	1.0	NC	No	No	1	BAG4_exon_chr8:38067525	1.0	1.0	0.0	NA	2	0.9949	0.7488	-0.246	NA	BAG4_exon_chr8:38067525
1	RAB36	14.6614	3.8581	-1.9206	0.9884	NC	No	No	1	RAB36_exon_chr22:23503686	1.0	1.0	0.0	NA	1	NA	NA	NA	NA	RAB36_exon_chr22:23503686
1	ACACA	66.6562	89.6934	0.4205	1.0	NC	No	No	1	ACACA_exon_chr17:35444374	1.0	1.0	0.0	NA	1	NA	NA	NA	NA	ACACA_exon_chr17:35444374
1	DYNC2H1	1.8969	2.572	0.4194	1.0	NC	No	No	1	DYNC2H1_exon_chr11:103349822	1.0	1.0	0.0	NA	1	NA	NA	NA	NA	DYNC2H1_exon_chr11:103349822
1	NABP2	21.9276	0.0	-6.9752	0.1093	NC	No	No	1	NABP2_exon_chr12:56622797	1.0	1.0	0.0	NA	1	NA	NA	NA	NA	NABP2_exon_chr12:56622797
1	ANKRD27	94.1715	57.2543	-0.7309	1.0	NC	No	No	1	ANKRD27_exon_chr19:33089284	1.0	1.0	0.0	NA	1	NA	NA	NA	NA	ANKRD27_exon_chr19:33089284
1	PRDX4	256.3713	281.8444	0.1379	1.0	NC	No	No	1	PRDX4_exon_chrX:23704401	1.0	1.0	0.0	NA	1	NA	NA	NA	NA	PRDX4_exon_chrX:23704401
1	FZD5	208.0839	213.1799	0.0336	1.0	NC	No	No	1	FZD5_exon_chr2:208633718	1.0	1.0	0.0	NA	3	0.8767	0.8359	-0.0408	NA	FZD5_exon_chr2:208633718
1	RABAC1	306.8627	255.7414	-0.2553	1.0	NC	No	No	1	RABAC1_exon_chr19:42461086	1.0	1.0	0.0	NA	1	NA	NA	NA	NA	RABAC1_exon_chr19:42461086
1	LINC02267	14.5177	0.0	-6.4018	0.3107	NC	No	No	1	LINC02267_exon_chr4:97739415	1.0	1.0	0.0	NA	1	NA	NA	NA	NA	LINC02267_exon_chr4:97739415
1	KLHL7	154.9002	120.5899	-0.3675	1.0	NC	No	No	2	KLHL7_exon_chr7:23165379	0.7723	0.6085	-0.1638	NA	2	NA	NA	NA	NA	KLHL7_exon_chr7:23165379
2	KLHL7									KLHL7_exon_chr7:23213633	0.2277	0.3546	0.1269	NA	1	NA	NA	NA	NA	KLHL7_exon_chr7:23213633
1	CCNL2	99.195	75.7165	-0.3915	1.0	NC	No	No	2	CCNL2_exon_chr1:1322962	0.8778	0.9628	0.085	NA	5	0.3337	0.265	-0.0687	NA	CCNL2_exon_chr1:1322962
2	CCNL2									CCNL2_exon_chr1:1328183	0.1222	0.0372	-0.085	NA	2	NA	NA	NA	NA	CCNL2_exon_chr1:1328183
1	HEBP1	10.0608	18.9045	0.8992	1.0	NC	No	No	1	HEBP1_exon_chr12:13128413	1.0	1.0	0.0	NA	1	NA	NA	NA	NA	HEBP1_exon_chr12:13128413
1	MALT1	29.9307	15.2127	-0.9759	1.0	NC	No	No	1	MALT1_exon_chr18:56414636	1.0	1.0	0.0	NA	5	NA	NA	NA	NA	MALT1_exon_chr18:56414636
1	SCO1	148.6881	113.9685	-0.3788	1.0	NC	No	No	1	SCO1_exon_chr17:10584570	1.0	1.0	0.0	NA	5	0.1522	0.1557	0.0035	NA	SCO1_exon_chr17:10584570
1	LSM7	377.0807	353.8814	-0.0977	0.9116	NC	No	No	1	LSM7_exon_chr19:2321821	1.0	1.0	0.0	NA	1	NA	NA	NA	NA	LSM7_exon_chr19:2321821
1	MRGBP	206.3	208.2879	0.0212	1.0	NC	No	No	1	MRGBP_exon_chr20:61430807	1.0	1.0	0.0	NA	4	0.7975	0.6967	-0.1007	NA	MRGBP_exon_chr20:61430807
1	ZNF473	4.9497	2.572	-0.952	1.0	NC	No	No	1	ZNF473_exon_chr19:50547926	1.0	1.0	0.0	NA	2	NA	NA	NA	NA	ZNF473_exon_chr19:50547926
1	MTF1	3.2518	4.2289	0.3699	1.0	NC	No	No	1	MTF1_exon_chr1:38281238	1.0	1.0	0.0	NA	1	NA	NA	NA	NA	MTF1_exon_chr1:38281238
1	LOC653513	16.5799	1.2861	-3.6299	0.5148	NC	No	No	1	LOC653513_exon_chr1:144677049	1.0	1.0	0.0	NA	2	NA	NA	NA	NA	LOC653513_exon_chr1:144677049
1	LAMTOR4	197.5192	182.425	-0.1135	1.0	NC	No	No	1	LAMTOR4_exon_chr7:99751472	1.0	1.0	0.0	NA	1	NA	NA	NA	NA	LAMTOR4_exon_chr7:99751472
1	NXPH4	19.2554	2.3674	-3.0244	0.7134	NC	No	No	1	NXPH4_exon_chr12:57618660	1.0	1.0	0.0	NA	1	NA	NA	NA	NA	NXPH4_exon_chr12:57618660
1	PFKFB4	165.7203	210.4964	0.3323	1.0	NC	No	No	1	PFKFB4_exon_chr3:48557239	1.0	1.0	0.0	NA	2	0.8882	0.8196	-0.0686	NA	PFKFB4_exon_chr3:48557239
1	ZDHHC2	43.4696	99.3479	1.1889	1.0	NC	No	No	1	ZDHHC2_exon_chr8:17077764	1.0	1.0	0.0	NA	3	NA	NA	NA	NA	ZDHHC2_exon_chr8:17077764
1	GHR	14.7036	2.8937	-2.333	0.9125	NC	No	No	1	GHR_exon_chr5:42718554	1.0	1.0	0.0	NA	1	NA	NA	NA	NA	GHR_exon_chr5:42718554
1	CNOT1	323.4628	303.2941	-0.0979	0.9125	NC	No	No	1	CNOT1_exon_chr16:58554940	1.0	1.0	0.0	NA	3	0.1361	0.2123	0.0762	NA	CNOT1_exon_chr16:58554940
1	POLD1	97.847	97.6139	0.0006	1.0	NC	No	No	1	POLD1_exon_chr19:50921098	1.0	1.0	0.0	NA	1	NA	NA	NA	NA	POLD1_exon_chr19:50921098
1	POLR3C	51.6771	57.0253	0.1475	1.0	NC	No	No	2	POLR3C_exon_chr1:145592256	0.1702	0.1477	-0.0224	NA	2	NA	NA	NA	NA	POLR3C_exon_chr1:145592256
2	POLR3C									POLR3C_exon_chr1:145592771	0.8298	0.8523	0.0224	NA	3	0.1464	0.151	0.0045	NA	POLR3C_exon_chr1:145592771
1	MBOAT1	15.8221	0.3706	-5.5653	0.3783	NC	No	No	1	MBOAT1_exon_chr6:20102643	1.0	1.0	0.0	NA	1	NA	NA	NA	NA	MBOAT1_exon_chr6:20102643
1	PCBD2	44.3296	23.6655	-0.8838	1.0	NC	No	No	1	PCBD2_exon_chr5:134296275	1.0	1.0	0.0	NA	4	NA	NA	NA	NA	PCBD2_exon_chr5:134296275
1	PPAN-P2RY11	14.4074	14.4094	0.0072	1.0	NC	No	No	1	PPAN-P2RY11_exon_chr19:10224308	1.0	1.0	0.0	NA	1	NA	NA	NA	NA	PPAN-P2RY11_exon_chr19:10224308
1	KDM5B	605.8549	750.4438	0.305	0.5148	NC	Yes	No	3	KDM5B_exon_chr1:202698301	0.9388	0.7011	-0.2378	NA	1	NA	NA	NA	NA	KDM5B_exon_chr1:202698301
2	KDM5B									KDM5B_exon_chr1:202731936	0.0273	0.1881	0.1609	Up	8	0.711	0.6649	-0.0462	NA	KDM5B_exon_chr1:202731936
3	KDM5B									KDM5B_exon_chr1:202733273	0.0339	0.1108	0.0769	NA	1	NA	NA	NA	NA	KDM5B_exon_chr1:202733273
1	DNAJC2	514.0431	805.2007	0.6525	0.1479	NC	No	No	5	DNAJC2_exon_chr7:102953090	0.3333	0.329	-0.0043	NA	1	NA	NA	NA	NA	DNAJC2_exon_chr7:102953090
2	DNAJC2									DNAJC2_exon_chr7:102957461	0.0495	0.1149	0.0653	NA	1	NA	NA	NA	NA	DNAJC2_exon_chr7:102957461
3	DNAJC2									DNAJC2_exon_chr7:102960125	0.0354	0.12	0.0845	NA	2	0.2243	0.3302	0.106	NA	DNAJC2_exon_chr7:102960125
4	DNAJC2									DNAJC2_exon_chr7:102962528	0.0165	0.1071	0.0906	NA	1	NA	NA	NA	NA	DNAJC2_exon_chr7:102962528
5	DNAJC2									DNAJC2_exon_chr7:102963079	0.5567	0.3145	-0.2422	NA	1	NA	NA	NA	NA	DNAJC2_exon_chr7:102963079
1	ARRDC3	82.0114	104.7725	0.361	1.0	NC	No	No	1	ARRDC3_exon_chr5:90667273	1.0	1.0	0.0	NA	6	0.6243	0.8281	0.2039	NA	ARRDC3_exon_chr5:90667273
1	RBBP4	810.1769	492.0746	-0.7211	0.0132	DOWN	No	No	1	RBBP4_exon_chr1:33145240	1.0	1.0	0.0	NA	5	0.1593	0.115	-0.0443	NA	RBBP4_exon_chr1:33145240
1	ZNF784	5.3432	8.5559	0.6537	1.0	NC	No	No	1	ZNF784_exon_chr19:56134010	1.0	1.0	0.0	NA	1	NA	NA	NA	NA	ZNF784_exon_chr19:56134010
1	IER5L	303.1114	392.4773	0.3775	0.457	NC	No	No	1	IER5L_exon_chr9:131940540	1.0	1.0	0.0	NA	2	0.0839	0.0899	0.0061	NA	IER5L_exon_chr9:131940540
1	ACHE	10.1054	4.6942	-1.0917	1.0	NC	No	No	1	ACHE_exon_chr7:100488709	1.0	1.0	0.0	NA	1	NA	NA	NA	NA	ACHE_exon_chr7:100488709
1	RTF1	55.4861	41.5033	-0.4127	1.0	NC	No	No	1	RTF1_exon_chr15:41772778	1.0	1.0	0.0	NA	6	0.6858	0.3719	-0.3139	NA	RTF1_exon_chr15:41772778
1	ATXN7L3B	119.4661	119.6625	-0.0091	1.0	NC	No	No	1	ATXN7L3B_exon_chr12:74931614	1.0	1.0	0.0	NA	1	NA	NA	NA	NA	ATXN7L3B_exon_chr12:74931614
1	PANK3	265.8592	209.8585	-0.3399	0.9489	NC	No	No	1	PANK3_exon_chr5:167984626	1.0	1.0	0.0	NA	13	0.4677	0.3578	-0.1099	NA	PANK3_exon_chr5:167984626
1	BCAR1	80.2028	91.2533	0.174	1.0	NC	No	No	1	BCAR1_exon_chr16:75263921	1.0	1.0	0.0	NA	1	NA	NA	NA	NA	BCAR1_exon_chr16:75263921
1	GATA2-AS1	24.6314	27.8152	0.1853	1.0	NC	No	No	1	GATA2-AS1_exon_chr3:128220451	1.0	1.0	0.0	NA	2	NA	NA	NA	NA	GATA2-AS1_exon_chr3:128220451
1	PPFIBP2	16.3903	1.1574	-3.7886	0.5035	NC	No	No	1	PPFIBP2_exon_chr11:7674254	1.0	1.0	0.0	NA	1	NA	NA	NA	NA	PPFIBP2_exon_chr11:7674254
1	EFNA5	15.9492	1.6262	-3.2995	0.5791	NC	No	No	1	EFNA5_exon_chr5:106717077	1.0	1.0	0.0	NA	2	NA	NA	NA	NA	EFNA5_exon_chr5:106717077
1	SLC38A1	234.4319	299.1776	0.3426	1.0	NC	No	No	1	SLC38A1_exon_chr12:46582854	1.0	1.0	0.0	NA	10	0.5707	0.6372	0.0665	NA	SLC38A1_exon_chr12:46582854
1	RNF144B	1.0414	8.9249	3.1467	1.0	NC	No	No	1	RNF144B_exon_chr6:18465157	1.0	1.0	0.0	NA	1	NA	NA	NA	NA	RNF144B_exon_chr6:18465157
1	MAP4K2	23.0779	87.4784	1.9161	0.7979	NC	No	No	1	MAP4K2_exon_chr11:64557096	1.0	1.0	0.0	NA	1	NA	NA	NA	NA	MAP4K2_exon_chr11:64557096
1	RNF4	130.2811	120.6236	-0.1194	1.0	NC	No	No	1	RNF4_exon_chr4:2515396	1.0	1.0	0.0	NA	1	NA	NA	NA	NA	RNF4_exon_chr4:2515396
1	N4BP1	27.7887	37.87	0.4476	1.0	NC	No	No	1	N4BP1_exon_chr16:48577172	1.0	1.0	0.0	NA	2	NA	NA	NA	NA	N4BP1_exon_chr16:48577172
1	PLPP3	49.9445	57.9435	0.2194	1.0	NC	No	No	1	PLPP3_exon_chr1:56962348	1.0	1.0	0.0	NA	1	NA	NA	NA	NA	PLPP3_exon_chr1:56962348
1	KIF3C	0.0	4.1798	4.527	1.0	NC	No	No	1	KIF3C_exon_chr2:26151940	1.0	1.0	0.0	NA	1	NA	NA	NA	NA	KIF3C_exon_chr2:26151940
1	CCDC167	174.5314	216.9325	0.3079	1.0	NC	No	No	1	CCDC167_exon_chr6:37451065	1.0	1.0	0.0	NA	1	NA	NA	NA	NA	CCDC167_exon_chr6:37451065
1	KCTD11	32.8101	62.7444	0.9201	1.0	NC	No	No	1	KCTD11_exon_chr17:7255207	1.0	1.0	0.0	NA	1	NA	NA	NA	NA	KCTD11_exon_chr17:7255207
1	RAD21	550.7673	485.9755	-0.1779	0.7516	NC	No	No	1	RAD21_exon_chr8:117859930	1.0	1.0	0.0	NA	1	NA	NA	NA	NA	RAD21_exon_chr8:117859930
1	MRPL58	288.774	238.4472	-0.2801	1.0	NC	No	No	1	MRPL58_exon_chr17:73017015	1.0	1.0	0.0	NA	1	NA	NA	NA	NA	MRPL58_exon_chr17:73017015
1	ABHD17C	25.7288	0.0	-7.2137	0.0314	DOWN	No	No	1	ABHD17C_exon_chr15:81046491	1.0	1.0	0.0	NA	2	NA	NA	NA	NA	ABHD17C_exon_chr15:81046491
1	PEX3	84.361	92.6927	0.1404	1.0	NC	No	No	1	PEX3_exon_chr6:143810279	1.0	1.0	0.0	NA	3	0.1386	0.2419	0.1033	NA	PEX3_exon_chr6:143810279
1	RUFY2	36.825	14.1723	-1.3597	1.0	NC	No	No	2	RUFY2_exon_chr10:70105668	0.8681	1.0	0.1319	NA	1	NA	NA	NA	NA	RUFY2_exon_chr10:70105668
2	RUFY2									RUFY2_exon_chr10:70139278	0.1319	0.0	-0.1319	NA	2	NA	NA	NA	NA	RUFY2_exon_chr10:70139278
1	AGPAT3	0.0	4.0766	4.4797	1.0	NC	No	No	1	AGPAT3_exon_chr21:45402184	1.0	1.0	0.0	NA	1	NA	NA	NA	NA	AGPAT3_exon_chr21:45402184
1	RILP	2.8056	8.6457	1.6026	1.0	NC	No	No	1	RILP_exon_chr17:1549913	1.0	1.0	0.0	NA	1	NA	NA	NA	NA	RILP_exon_chr17:1549913
1	SNX6	642.6946	545.8905	-0.2324	0.7005	NC	No	No	1	SNX6_exon_chr14:35032381	1.0	1.0	0.0	NA	7	0.2806	0.3481	0.0675	NA	SNX6_exon_chr14:35032381
1	ZNF41	7.0455	8.0379	0.1827	1.0	NC	No	No	1	ZNF41_exon_chrX:47308873	1.0	1.0	0.0	NA	3	NA	NA	NA	NA	ZNF41_exon_chrX:47308873
1	ZNF493	13.5347	0.0	-6.3009	0.3329	NC	No	No	2	ZNF493_exon_chr19:21590274	0.8795	nan	nan	NA	1	NA	NA	NA	NA	ZNF493_exon_chr19:21590274
2	ZNF493									ZNF493_exon_chr19:21605714	0.1205	nan	nan	NA	1	NA	NA	NA	NA	ZNF493_exon_chr19:21605714
1	CD151	484.5366	419.9289	-0.2076	0.7037	NC	No	No	1	CD151_exon_chr11:838132	1.0	1.0	0.0	NA	1	NA	NA	NA	NA	CD151_exon_chr11:838132
1	COG3	22.1639	51.5286	1.2289	1.0	NC	No	No	1	COG3_exon_chr13:46108836	1.0	1.0	0.0	NA	3	NA	NA	NA	NA	COG3_exon_chr13:46108836
1	SLC22A5	29.2057	32.9367	0.17	1.0	NC	No	No	1	SLC22A5_exon_chr5:131729876	1.0	1.0	0.0	NA	1	NA	NA	NA	NA	SLC22A5_exon_chr5:131729876
1	NOSTRIN	51.4495	47.1343	-0.1282	1.0	NC	No	No	1	NOSTRIN_exon_chr2:169721343	1.0	1.0	0.0	NA	1	NA	NA	NA	NA	NOSTRIN_exon_chr2:169721343
1	PKN3	2.9491	21.3283	2.7808	0.5224	NC	No	No	1	PKN3_exon_chr9:131482672	1.0	1.0	0.0	NA	1	NA	NA	NA	NA	PKN3_exon_chr9:131482672
1	UBC	1854.5121	1894.1802	0.0288	0.9279	NC	No	No	1	UBC_exon_chr12:125398320	1.0	1.0	0.0	NA	1	NA	NA	NA	NA	UBC_exon_chr12:125398320
1	USP39	119.1401	115.1998	-0.0556	1.0	NC	No	No	1	USP39_exon_chr2:85875883	1.0	1.0	0.0	NA	1	NA	NA	NA	NA	USP39_exon_chr2:85875883
1	EIF3I	574.5055	513.5661	-0.1645	0.8187	NC	No	No	1	EIF3I_exon_chr1:32696715	1.0	1.0	0.0	NA	1	NA	NA	NA	NA	EIF3I_exon_chr1:32696715
1	RNF223	4.8517	7.4593	0.6074	1.0	NC	No	No	1	RNF223_exon_chr1:1007955	1.0	1.0	0.0	NA	1	NA	NA	NA	NA	RNF223_exon_chr1:1007955
1	PLXNA2	157.4933	154.216	-0.04	1.0	NC	No	No	1	PLXNA2_exon_chr1:208200683	1.0	1.0	0.0	NA	3	0.3694	0.2538	-0.1156	NA	PLXNA2_exon_chr1:208200683
1	MRPS2	386.0759	371.5304	-0.0564	0.9279	NC	No	No	1	MRPS2_exon_chr9:138395387	1.0	1.0	0.0	NA	1	NA	NA	NA	NA	MRPS2_exon_chr9:138395387
1	GIP	0.0	2.8294	3.9672	1.0	NC	No	No	1	GIP_exon_chr17:47036078	1.0	1.0	0.0	NA	1	NA	NA	NA	NA	GIP_exon_chr17:47036078
1	UMPS	165.5168	121.5762	-0.4583	0.9037	NC	No	No	1	UMPS_exon_chr3:124462761	1.0	1.0	0.0	NA	1	NA	NA	NA	NA	UMPS_exon_chr3:124462761
1	DYNLL1	1224.2975	1151.7754	-0.0898	0.8303	NC	No	No	1	DYNLL1_exon_chr12:120935875	1.0	1.0	0.0	NA	1	NA	NA	NA	NA	DYNLL1_exon_chr12:120935875
1	ZYX	115.6601	68.0508	-0.773	1.0	NC	No	No	1	ZYX_exon_chr7:143087670	1.0	1.0	0.0	NA	1	NA	NA	NA	NA	ZYX_exon_chr7:143087670
1	C1GALT1	254.1336	272.734	0.094	1.0	NC	No	No	1	C1GALT1_exon_chr7:7283154	1.0	1.0	0.0	NA	6	0.2375	0.325	0.0875	NA	C1GALT1_exon_chr7:7283154
1	SCARNA15	0.0	4.8178	4.7215	1.0	NC	No	No	1	SCARNA15_exon_chr15:83424696	1.0	1.0	0.0	NA	1	NA	NA	NA	NA	SCARNA15_exon_chr15:83424696
1	TNFAIP8L2-SCNM1	59.2013	108.1717	0.8633	1.0	NC	No	No	1	TNFAIP8L2-SCNM1_exon_chr1:151141461	1.0	1.0	0.0	NA	2	0.0	0.0899	0.0899	NA	TNFAIP8L2-SCNM1_exon_chr1:151141461
1	GDAP2	68.4131	20.4304	-1.7545	1.0	NC	No	No	2	GDAP2_exon_chr1:118413238	0.4985	0.4246	-0.0738	NA	5	NA	NA	NA	NA	GDAP2_exon_chr1:118413238
2	GDAP2									GDAP2_exon_chr1:118420774	0.5015	0.5754	0.0738	NA	1	NA	NA	NA	NA	GDAP2_exon_chr1:118420774
1	FIGN	132.4562	168.7525	0.3331	1.0	NC	No	No	1	FIGN_exon_chr2:164468316	1.0	1.0	0.0	NA	3	0.7728	0.6966	-0.0762	NA	FIGN_exon_chr2:164468316
1	TNPO3	321.2803	331.4266	0.0365	0.9471	NC	No	No	1	TNPO3_exon_chr7:128595439	1.0	1.0	0.0	NA	1	NA	NA	NA	NA	TNPO3_exon_chr7:128595439
1	LARP1B	89.7004	88.2786	-0.0028	1.0	NC	No	No	2	LARP1B_exon_chr4:129012155	0.1269	0.0	-0.1269	NA	1	NA	NA	NA	NA	LARP1B_exon_chr4:129012155
2	LARP1B									LARP1B_exon_chr4:129028293	0.8731	0.9664	0.0933	NA	2	0.8929	0.8588	-0.0341	NA	LARP1B_exon_chr4:129028293
1	PCDHB2	20.9692	34.3368	0.705055572968892	NA	NC	No	No	1	PCDHB2_exon_chr5:140474198	1.0	1.0	0.0	NA	3	NA	NA	NA	NA	PCDHB2_exon_chr5:140474198
1	NUDT3	150.8405	114.7779	-0.3872	0.9205	NC	No	No	1	NUDT3_exon_chr6:34256708	1.0	1.0	0.0	NA	4	0.422	0.5915	0.1695	NA	NUDT3_exon_chr6:34256708
1	PROSER2-AS1	54.9015	46.5285	-0.2362	1.0	NC	No	No	1	PROSER2-AS1_exon_chr10:11893755	1.0	1.0	0.0	NA	3	0.8386	0.6705	-0.1681	NA	PROSER2-AS1_exon_chr10:11893755
1	VPS9D1	5.111	3.1509	-0.6759	1.0	NC	No	No	1	VPS9D1_exon_chr16:89774362	1.0	1.0	0.0	NA	1	NA	NA	NA	NA	VPS9D1_exon_chr16:89774362
1	FBXO31	16.2835	5.7228	-1.4979	0.9217	NC	No	No	1	FBXO31_exon_chr16:87365116	1.0	1.0	0.0	NA	2	NA	NA	NA	NA	FBXO31_exon_chr16:87365116
1	PSMB6	891.5835	875.3518	-0.0246	0.9388	NC	No	No	1	PSMB6_exon_chr17:4701554	1.0	1.0	0.0	NA	1	NA	NA	NA	NA	PSMB6_exon_chr17:4701554
1	EZH1	24.8436	34.9928	0.4717	1.0	NC	No	No	2	EZH1_exon_chr17:40854610	0.8315	0.6426	-0.1889	NA	1	NA	NA	NA	NA	EZH1_exon_chr17:40854610
2	EZH1									EZH1_exon_chr17:40870085	0.1685	0.3574	0.1889	NA	2	NA	NA	NA	NA	EZH1_exon_chr17:40870085
1	RNF181	117.0406	120.563	0.0578	1.0	NC	No	No	1	RNF181_exon_chr2:85824567	1.0	1.0	0.0	NA	1	NA	NA	NA	NA	RNF181_exon_chr2:85824567
1	FGFR3	14.4379	4.3338	-1.7403	1.0	NC	No	No	1	FGFR3_exon_chr4:1808842	1.0	1.0	0.0	NA	1	NA	NA	NA	NA	FGFR3_exon_chr4:1808842
1	FCHO2	56.638	35.2534	-0.6782	1.0	NC	No	No	2	FCHO2_exon_chr5:72286538	0.0106	0.1184	0.1078	NA	1	NA	NA	NA	NA	FCHO2_exon_chr5:72286538
2	FCHO2									FCHO2_exon_chr5:72383894	0.9894	0.8816	-0.1078	NA	1	NA	NA	NA	NA	FCHO2_exon_chr5:72383894
1	PLK1	113.1616	160.272	0.5048	1.0	NC	No	No	1	PLK1_exon_chr16:23701180	1.0	1.0	0.0	NA	1	NA	NA	NA	NA	PLK1_exon_chr16:23701180
1	ZNF347	33.879	29.0091	-0.2161	1.0	NC	No	No	1	ZNF347_exon_chr19:53645809	1.0	1.0	0.0	NA	4	NA	NA	NA	NA	ZNF347_exon_chr19:53645809
1	GAS6	69.5999	78.3831	0.1755	1.0	NC	No	No	1	GAS6_exon_chr13:114523991	1.0	1.0	0.0	NA	1	NA	NA	NA	NA	GAS6_exon_chr13:114523991
1	ADH5	628.0041	466.3948	-0.4268	0.2732	NC	No	No	1	ADH5_exon_chr4:99993592	1.0	1.0	0.0	NA	3	0.1599	0.1137	-0.0461	NA	ADH5_exon_chr4:99993592
1	CENPI	24.4465	42.3655	0.7796	1.0	NC	No	No	3	CENPI_exon_chrX:100357262	0.3107	0.2849	-0.0258	NA	1	NA	NA	NA	NA	CENPI_exon_chrX:100357262
2	CENPI									CENPI_exon_chrX:100402931	0.2233	0.0365	-0.1868	NA	1	NA	NA	NA	NA	CENPI_exon_chrX:100402931
3	CENPI									CENPI_exon_chrX:100417821	0.466	0.6786	0.2126	NA	2	NA	NA	NA	NA	CENPI_exon_chrX:100417821
1	RFC4	376.3293	325.6418	-0.2004	0.7995	NC	No	No	1	RFC4_exon_chr3:186507853	1.0	1.0	0.0	NA	1	NA	NA	NA	NA	RFC4_exon_chr3:186507853
1	SUPT20H	78.6345	52.5641	-0.574	1.0	NC	No	No	1	SUPT20H_exon_chr13:37583946	1.0	1.0	0.0	NA	3	NA	NA	NA	NA	SUPT20H_exon_chr13:37583946
1	VWA1	387.7913	407.4667	0.0721	0.8852	NC	No	No	1	VWA1_exon_chr1:1374460	1.0	1.0	0.0	NA	1	NA	NA	NA	NA	VWA1_exon_chr1:1374460
1	PNN	1051.9192	1724.5179	0.7147	0.3826	NC	No	No	1	PNN_exon_chr14:39649706	1.0	1.0	0.0	NA	14	0.3027	0.216	-0.0868	NA	PNN_exon_chr14:39649706
1	ARPC1A	613.226	635.0339	0.0461	0.9116	NC	No	No	1	ARPC1A_exon_chr7:98963513	1.0	1.0	0.0	NA	1	NA	NA	NA	NA	ARPC1A_exon_chr7:98963513
1	OSCP1	0.0	3.3438	4.2069	1.0	NC	No	No	1	OSCP1_exon_chr1:36884179	1.0	1.0	0.0	NA	1	NA	NA	NA	NA	OSCP1_exon_chr1:36884179
1	KCNJ13	8.4043	0.0	-5.5914	1.0	NC	No	No	1	KCNJ13_exon_chr2:233633523	1.0	1.0	0.0	NA	1	NA	NA	NA	NA	KCNJ13_exon_chr2:233633523
1	WDR1	379.2354	418.9983	0.1468	0.8474	NC	No	No	1	WDR1_exon_chr4:10077108	1.0	1.0	0.0	NA	3	0.2807	0.3802	0.0995	NA	WDR1_exon_chr4:10077108
1	LINC02527	0.0	5.0225	4.7834	1.0	NC	No	No	1	LINC02527_exon_chr6:112222344	1.0	1.0	0.0	NA	1	NA	NA	NA	NA	LINC02527_exon_chr6:112222344
1	RFWD3	65.7196	83.6676	0.3333	1.0	NC	No	No	1	RFWD3_exon_chr16:74657969	1.0	1.0	0.0	NA	2	0.9059	0.9417	0.0357	NA	RFWD3_exon_chr16:74657969
1	NUP58	122.4907	138.616	0.1707	1.0	NC	No	No	1	NUP58_exon_chr13:25914102	1.0	1.0	0.0	NA	4	0.9631	0.8279	-0.1351	NA	NUP58_exon_chr13:25914102
1	ROR1	26.0926	26.2548	-0.0111	1.0	NC	No	No	1	ROR1_exon_chr1:64643110	1.0	1.0	0.0	NA	4	0.6639	0.998	NA	NA	ROR1_exon_chr1:64643110
1	ZNF768	8.7297	15.032	0.7792	1.0	NC	No	No	1	ZNF768_exon_chr16:30537372	1.0	1.0	0.0	NA	1	NA	NA	NA	NA	ZNF768_exon_chr16:30537372
1	KANSL3	76.8944	80.3207	0.0517	1.0	NC	No	No	1	KANSL3_exon_chr2:97261368	1.0	1.0	0.0	NA	1	NA	NA	NA	NA	KANSL3_exon_chr2:97261368
1	ZNHIT1	105.8286	129.7725	0.2881	1.0	NC	No	No	1	ZNHIT1_exon_chr7:100867217	1.0	1.0	0.0	NA	1	NA	NA	NA	NA	ZNHIT1_exon_chr7:100867217
1	CDK5RAP2	52.5079	111.4443	1.074	1.0	NC	Yes	No	3	CDK5RAP2_exon_chr9:123151570	0.5939	0.2196	-0.3743	NA	2	NA	NA	NA	NA	CDK5RAP2_exon_chr9:123151570
2	CDK5RAP2									CDK5RAP2_exon_chr9:123156916	0.1469	0.0725	-0.0744	NA	1	NA	NA	NA	NA	CDK5RAP2_exon_chr9:123156916
3	CDK5RAP2									CDK5RAP2_exon_chr9:123290203	0.1207	0.7079	0.5872	Up	1	NA	NA	NA	NA	CDK5RAP2_exon_chr9:123290203
1	SMU1	121.5037	52.0793	-1.2171	0.8365	NC	No	No	1	SMU1_exon_chr9:33047389	1.0	1.0	0.0	NA	9	0.8072	0.8545	0.0473	NA	SMU1_exon_chr9:33047389
1	FBXL5	23.6157	33.0355	0.4718	1.0	NC	No	No	1	FBXL5_exon_chr4:15607422	1.0	1.0	0.0	NA	1	NA	NA	NA	NA	FBXL5_exon_chr4:15607422
1	ANKRA2	40.1979	32.6122	-0.322	1.0	NC	No	No	1	ANKRA2_exon_chr5:72848677	1.0	1.0	0.0	NA	1	NA	NA	NA	NA	ANKRA2_exon_chr5:72848677
1	ATP5PD	1623.215	1481.165	-0.129	0.7619	NC	No	No	1	ATP5PD_exon_chr17:73035158	1.0	1.0	0.0	NA	1	NA	NA	NA	NA	ATP5PD_exon_chr17:73035158
1	USP5	67.5639	54.2661	-0.3303	1.0	NC	No	No	1	USP5_exon_chr12:6975147	1.0	1.0	0.0	NA	1	NA	NA	NA	NA	USP5_exon_chr12:6975147
1	CDR2L	21.1365	0.3706	-5.97801995826005	NA	NC	No	No	1	CDR2L_exon_chr17:72999277	1.0	1.0	0.0	NA	1	NA	NA	NA	NA	CDR2L_exon_chr17:72999277
1	SLC36A4	66.1387	16.8157	-1.9641	1.0	NC	No	No	1	SLC36A4_exon_chr11:92882010	1.0	1.0	0.0	NA	7	NA	NA	NA	NA	SLC36A4_exon_chr11:92882010
1	CDKAL1	17.3823	28.1682	0.6925	1.0	NC	No	No	1	CDKAL1_exon_chr6:21231078	1.0	1.0	0.0	NA	2	NA	NA	NA	NA	CDKAL1_exon_chr6:21231078
1	REEP3	196.1316	176.547	-0.1549	1.0	NC	No	No	1	REEP3_exon_chr10:65380572	1.0	1.0	0.0	NA	8	0.193	0.2732	0.0803	NA	REEP3_exon_chr10:65380572
1	ARSA	13.44	14.725	0.1308	1.0	NC	No	No	1	ARSA_exon_chr22:51063892	1.0	1.0	0.0	NA	1	NA	NA	NA	NA	ARSA_exon_chr22:51063892
1	SOWAHD	0.0	1.3504	2.9043	1.0	NC	No	No	1	SOWAHD_exon_chrX:118892550	1.0	1.0	0.0	NA	1	NA	NA	NA	NA	SOWAHD_exon_chrX:118892550
1	SF3B3	294.3973	366.999	0.3251	0.6387	NC	No	No	1	SF3B3_exon_chr16:70605575	1.0	1.0	0.0	NA	5	0.5365	0.611	0.0744	NA	SF3B3_exon_chr16:70605575
1	RPL18	3269.7422	2683.8106	-0.2846	0.3403	NC	No	No	1	RPL18_exon_chr19:49118704	1.0	1.0	0.0	NA	1	NA	NA	NA	NA	RPL18_exon_chr19:49118704
1	CNOT6	180.9853	349.0974	0.955	0.1084	NC	No	No	1	CNOT6_exon_chr5:180000987	1.0	1.0	0.0	NA	8	0.8378	0.7077	-0.1301	NA	CNOT6_exon_chr5:180000987
1	CRY2	19.1645	37.1622	0.9557	1.0	NC	No	No	1	CRY2_exon_chr11:45902464	1.0	1.0	0.0	NA	1	NA	NA	NA	NA	CRY2_exon_chr11:45902464
1	CNNM2	20.6926	8.6353	-1.267	1.0	NC	No	No	1	CNNM2_exon_chr10:104836727	1.0	1.0	0.0	NA	4	NA	NA	NA	NA	CNNM2_exon_chr10:104836727
1	TAF3	52.9493	136.587	1.3705	0.4446	NC	No	No	2	TAF3_exon_chr10:8005882	0.5158	0.8413	0.3254	NA	4	NA	NA	NA	NA	TAF3_exon_chr10:8005882
2	TAF3									TAF3_exon_chr10:8056599	0.4842	0.1587	-0.3254	NA	3	NA	NA	NA	NA	TAF3_exon_chr10:8056599
1	ITPRIPL2	89.5841	69.8179	-0.3525	1.0	NC	No	No	1	ITPRIPL2_exon_chr16:19125253	1.0	1.0	0.0	NA	5	0.9132	0.7942	-0.119	NA	ITPRIPL2_exon_chr16:19125253
1	IRF3	19.1622	37.67	0.9741	1.0	NC	No	No	1	IRF3_exon_chr19:50163090	1.0	1.0	0.0	NA	1	NA	NA	NA	NA	IRF3_exon_chr19:50163090
1	CDADC1	15.8916	16.9427	0.0983	1.0	NC	No	No	1	CDADC1_exon_chr13:49841625	1.0	1.0	0.0	NA	1	NA	NA	NA	NA	CDADC1_exon_chr13:49841625
1	MSX2	811.5616	873.8623	0.1057	0.8687	NC	No	No	1	MSX2_exon_chr5:174156161	1.0	1.0	0.0	NA	5	0.6245	0.6159	-0.0086	NA	MSX2_exon_chr5:174156161
1	VPS26A	427.2959	303.8642	-0.4929	0.381	NC	No	No	1	VPS26A_exon_chr10:70930911	1.0	1.0	0.0	NA	5	0.656	0.7271	0.0711	NA	VPS26A_exon_chr10:70930911
1	PXK	31.4588	3.1509	-3.284	0.3711	NC	No	No	1	PXK_exon_chr3:58410478	1.0	1.0	0.0	NA	2	NA	NA	NA	NA	PXK_exon_chr3:58410478
1	MIR600HG	0.271	10.7152	4.8908	1.0	NC	No	No	1	MIR600HG_exon_chr9:125877756	1.0	1.0	0.0	NA	1	NA	NA	NA	NA	MIR600HG_exon_chr9:125877756
1	UBXN2A	72.2818	54.739	-0.3776	1.0	NC	No	No	1	UBXN2A_exon_chr2:24222541	1.0	1.0	0.0	NA	5	0.1335	0.4502	0.3167	NA	UBXN2A_exon_chr2:24222541
1	ENDOV	2.2262	0.0	-3.6889	1.0	NC	No	No	1	ENDOV_exon_chr17:78403572	1.0	1.0	0.0	NA	1	NA	NA	NA	NA	ENDOV_exon_chr17:78403572
1	COPRS	61.0785	96.7888	0.665	1.0	NC	No	No	1	COPRS_exon_chr17:30179327	1.0	1.0	0.0	NA	1	NA	NA	NA	NA	COPRS_exon_chr17:30179327
1	PLCL2	54.0537	11.6679	-2.2058	0.3781	NC	No	No	1	PLCL2_exon_chr3:17131224	1.0	1.0	0.0	NA	1	NA	NA	NA	NA	PLCL2_exon_chr3:17131224
1	SKAP2	67.418	86.0223	0.3625	1.0	NC	No	No	1	SKAP2_exon_chr7:26709275	1.0	1.0	0.0	NA	1	NA	NA	NA	NA	SKAP2_exon_chr7:26709275
1	VPS36	120.8357	134.2574	0.1394	1.0	NC	No	No	1	VPS36_exon_chr13:52990058	1.0	1.0	0.0	NA	6	0.1883	0.3168	0.1285	NA	VPS36_exon_chr13:52990058
1	HSPB11	55.1987	48.5387	-0.1897	1.0	NC	No	No	1	HSPB11_exon_chr1:54387440	1.0	1.0	0.0	NA	1	NA	NA	NA	NA	HSPB11_exon_chr1:54387440
1	NAA50	548.9696	525.4972	-0.0682	0.8817	NC	No	No	1	NAA50_exon_chr3:113440784	1.0	1.0	0.0	NA	9	0.9755	0.8921	-0.0834	NA	NAA50_exon_chr3:113440784
1	COL4A2	204.451	176.4799	-0.2075	1.0	NC	No	No	1	COL4A2_exon_chr13:111164280	1.0	1.0	0.0	NA	1	NA	NA	NA	NA	COL4A2_exon_chr13:111164280
1	ZSWIM9	38.2293	70.2239	0.88	1.0	NC	No	No	1	ZSWIM9_exon_chr19:48697909	1.0	1.0	0.0	NA	3	0.6049	0.2479	-0.357	NA	ZSWIM9_exon_chr19:48697909
1	TMEM102	3.579	2.8514	-0.3633	1.0	NC	No	No	1	TMEM102_exon_chr17:7339512	1.0	1.0	0.0	NA	1	NA	NA	NA	NA	TMEM102_exon_chr17:7339512
1	RIPOR2	2.0857	0.5144	-1.9881	1.0	NC	No	No	1	RIPOR2_exon_chr6:24841003	1.0	1.0	0.0	NA	1	NA	NA	NA	NA	RIPOR2_exon_chr6:24841003
1	SH3BGR	0.0	3.6011	4.3133	1.0	NC	No	No	1	SH3BGR_exon_chr21:40887014	1.0	1.0	0.0	NA	1	NA	NA	NA	NA	SH3BGR_exon_chr21:40887014
1	NKIRAS1	10.1783	24.0767	1.2065	0.8799	NC	No	No	1	NKIRAS1_exon_chr3:23934828	1.0	1.0	0.0	NA	2	NA	NA	NA	NA	NKIRAS1_exon_chr3:23934828
1	NAF1	18.7212	12.1858	-0.6194	1.0	NC	No	No	1	NAF1_exon_chr4:164050500	1.0	1.0	0.0	NA	1	NA	NA	NA	NA	NAF1_exon_chr4:164050500
1	RPP25L	60.248	43.8336	-0.4455	1.0	NC	No	No	1	RPP25L_exon_chr9:34611329	1.0	1.0	0.0	NA	1	NA	NA	NA	NA	RPP25L_exon_chr9:34611329
1	KCTD18	38.0916	9.3237	-2.0378	1.0	NC	No	No	1	KCTD18_exon_chr2:201355339	1.0	1.0	0.0	NA	2	NA	NA	NA	NA	KCTD18_exon_chr2:201355339
1	CCNDBP1	131.4139	137.4836	0.0703	1.0	NC	No	No	1	CCNDBP1_exon_chr15:43486924	1.0	1.0	0.0	NA	1	NA	NA	NA	NA	CCNDBP1_exon_chr15:43486924
1	LINC00467	24.513	9.9198	-1.3287	0.9028	NC	No	No	1	LINC00467_exon_chr1:211605660	1.0	1.0	0.0	NA	1	NA	NA	NA	NA	LINC00467_exon_chr1:211605660
1	PI4KA	818.7647	683.3957	-0.2597	0.54	NC	No	No	1	PI4KA_exon_chr22:21062386	1.0	1.0	0.0	NA	1	NA	NA	NA	NA	PI4KA_exon_chr22:21062386
1	PPP2R3B	85.7614	71.3141	-0.2712	1.0	NC	No	No	2	PPP2R3B_exon_chrX:295252	0.4961	0.4948	-0.0013	NA	1	NA	NA	NA	NA	PPP2R3B_exon_chrX:295252
2	PPP2R3B									PPP2R3B_exon_chrY:245252	0.5039	0.5052	0.0013	NA	1	NA	NA	NA	NA	PPP2R3B_exon_chrY:245252
1	RUVBL2	201.0803	169.4385	-0.2351	1.0	NC	No	No	1	RUVBL2_exon_chr19:49519073	1.0	1.0	0.0	NA	2	0.068	0.0964	0.0283	NA	RUVBL2_exon_chr19:49519073
1	DBR1	38.5133	36.7562	-0.0651	1.0	NC	No	No	1	DBR1_exon_chr3:137881424	1.0	1.0	0.0	NA	3	0.4515	0.1303	-0.3212	NA	DBR1_exon_chr3:137881424
1	PDE8A	21.9553	31.8694	0.5205	1.0	NC	No	No	1	PDE8A_exon_chr15:85681027	1.0	1.0	0.0	NA	3	NA	NA	NA	NA	PDE8A_exon_chr15:85681027
1	ALDH2	14.5811	31.6282	1.0882	1.0	NC	No	No	1	ALDH2_exon_chr12:112247346	1.0	1.0	0.0	NA	1	NA	NA	NA	NA	ALDH2_exon_chr12:112247346
1	CREBRF	60.8042	72.8862	0.2727	1.0	NC	No	No	2	CREBRF_exon_chr5:172517317	0.1083	0.0248	-0.0836	NA	2	NA	NA	NA	NA	CREBRF_exon_chr5:172517317
2	CREBRF									CREBRF_exon_chr5:172560632	0.8917	0.9752	0.0836	NA	3	0.2456	0.2485	0.0029	NA	CREBRF_exon_chr5:172560632
1	PTPRK	14.9079	5.4457	-1.4561	0.9529	NC	No	No	1	PTPRK_exon_chr6:128291425	1.0	1.0	0.0	NA	1	NA	NA	NA	NA	PTPRK_exon_chr6:128291425
1	FAM189B	3.6107	5.7265	0.6361	1.0	NC	No	No	1	FAM189B_exon_chr1:155217746	1.0	1.0	0.0	NA	1	NA	NA	NA	NA	FAM189B_exon_chr1:155217746
1	RPL4	7252.1903	6685.5954	-0.118	0.721	NC	No	No	1	RPL4_exon_chr15:66791990	1.0	1.0	0.0	NA	1	NA	NA	NA	NA	RPL4_exon_chr15:66791990
1	PCBP2	1351.8066	1420.192	0.0729	0.8636	NC	No	No	1	PCBP2_exon_chr12:53873189	1.0	1.0	0.0	NA	6	0.3859	0.3427	-0.0432	NA	PCBP2_exon_chr12:53873189
1	WASHC1	105.8814	81.7315	-0.3802	1.0	NC	No	No	1	WASHC1_exon_chr9:14940	1.0	1.0	0.0	NA	1	NA	NA	NA	NA	WASHC1_exon_chr9:14940
1	RAB38	0.0	18.583	6.6737	0.2546	NC	No	No	1	RAB38_exon_chr11:87847308	1.0	1.0	0.0	NA	1	NA	NA	NA	NA	RAB38_exon_chr11:87847308
1	ZFP36L1	236.0752	114.6486	-1.0481	0.2632	NC	No	No	1	ZFP36L1_exon_chr14:69257209	1.0	1.0	0.0	NA	3	0.946	0.9061	-0.0399	NA	ZFP36L1_exon_chr14:69257209
1	IER5	77.71	65.4102	-0.2526	1.0	NC	No	No	1	IER5_exon_chr1:181057835	1.0	1.0	0.0	NA	1	NA	NA	NA	NA	IER5_exon_chr1:181057835
1	ZNF513	20.241	15.77	-0.3616	1.0	NC	No	No	1	ZNF513_exon_chr2:27601238	1.0	1.0	0.0	NA	1	NA	NA	NA	NA	ZNF513_exon_chr2:27601238
1	TIMM10	157.6257	158.3555	0.0146	1.0	NC	No	No	1	TIMM10_exon_chr11:57296391	1.0	1.0	0.0	NA	1	NA	NA	NA	NA	TIMM10_exon_chr11:57296391
1	AP5B1	106.1222	49.0178	-1.1254	1.0	NC	No	No	1	AP5B1_exon_chr11:65547813	1.0	1.0	0.0	NA	4	0.9613	0.9841	0.0228	NA	AP5B1_exon_chr11:65547813
1	SUSD6	17.0199	12.2908	-0.4876	1.0	NC	No	No	1	SUSD6_exon_chr14:70177670	1.0	1.0	0.0	NA	1	NA	NA	NA	NA	SUSD6_exon_chr14:70177670
1	SMAD4	200.3837	159.8881	-0.334	0.9117	NC	No	No	1	SMAD4_exon_chr18:48604625	1.0	1.0	0.0	NA	7	0.093	0.1069	0.0139	NA	SMAD4_exon_chr18:48604625
1	CLEC7A	2.4388	17.0398	2.7762	0.8214	NC	No	No	2	CLEC7A_exon_chr12:10271189	0.0	0.434	0.434	NA	1	NA	NA	NA	NA	CLEC7A_exon_chr12:10271189
2	CLEC7A									CLEC7A_exon_chr12:10280041	1.0	0.566	-0.434	NA	1	NA	NA	NA	NA	CLEC7A_exon_chr12:10280041
1	GK5	23.9444	25.5126	0.0767	1.0	NC	No	No	1	GK5_exon_chr3:141884612	1.0	1.0	0.0	NA	2	NA	NA	NA	NA	GK5_exon_chr3:141884612
1	ACOT13	546.187	501.5154	-0.1176	0.8405	NC	No	No	1	ACOT13_exon_chr6:24701686	1.0	1.0	0.0	NA	1	NA	NA	NA	NA	ACOT13_exon_chr6:24701686
1	NLRP7	315.0825	301.233	-0.055	0.9187	NC	No	No	1	NLRP7_exon_chr19:55435240	1.0	1.0	0.0	NA	1	NA	NA	NA	NA	NLRP7_exon_chr19:55435240
1	LAMC2	4.5453	0.0	-4.7072	1.0	NC	No	No	1	LAMC2_exon_chr1:183212281	1.0	1.0	0.0	NA	1	NA	NA	NA	NA	LAMC2_exon_chr1:183212281
1	ZBTB24	2.1679	24.3039	3.4307	0.5842	NC	No	No	1	ZBTB24_exon_chr6:109803257	1.0	1.0	0.0	NA	1	NA	NA	NA	NA	ZBTB24_exon_chr6:109803257
1	RUSC1	5.6934	19.2249	1.7316	0.7866	NC	No	No	1	RUSC1_exon_chr1:155300193	1.0	1.0	0.0	NA	2	NA	NA	NA	NA	RUSC1_exon_chr1:155300193
1	TRIM11	25.9701	25.997	-0.008	1.0	NC	No	No	1	TRIM11_exon_chr1:228582953	1.0	1.0	0.0	NA	1	NA	NA	NA	NA	TRIM11_exon_chr1:228582953
1	MTHFSD	43.6186	16.1772	-1.4106	0.9028	NC	No	No	1	MTHFSD_exon_chr16:86566087	1.0	1.0	0.0	NA	3	NA	NA	NA	NA	MTHFSD_exon_chr16:86566087
1	CHPF	111.0744	107.7845	-0.0276	1.0	NC	No	No	1	CHPF_exon_chr2:220405364	1.0	1.0	0.0	NA	1	NA	NA	NA	NA	CHPF_exon_chr2:220405364
1	RPS9	2790.7056	3165.3159	0.1806	0.5572	NC	No	No	1	RPS9_exon_chr19:54711265	1.0	1.0	0.0	NA	1	NA	NA	NA	NA	RPS9_exon_chr19:54711265
1	WDR59	8.3677	3.2829	-1.3292	1.0	NC	No	No	1	WDR59_exon_chr16:74946260	1.0	1.0	0.0	NA	1	NA	NA	NA	NA	WDR59_exon_chr16:74946260
1	DRG2	197.3475	248.5857	0.3427	0.9279	NC	No	No	1	DRG2_exon_chr17:18010467	1.0	1.0	0.0	NA	2	0.1429	0.2162	0.0734	NA	DRG2_exon_chr17:18010467
1	ZBED5-AS1	17.252	3.3438	-2.35835451893319	NA	NC	No	No	1	ZBED5-AS1_exon_chr11:10899927	1.0	1.0	0.0	NA	2	NA	NA	NA	NA	ZBED5-AS1_exon_chr11:10899927
1	KIAA1109	20.7192	29.9099	0.5193	1.0	NC	No	No	3	KIAA1109_exon_chr4:123107190	0.0	0.4755	0.4755	NA	1	NA	NA	NA	NA	KIAA1109_exon_chr4:123107190
2	KIAA1109									KIAA1109_exon_chr4:123192172	0.0576	0.0968	0.0391	NA	1	NA	NA	NA	NA	KIAA1109_exon_chr4:123192172
3	KIAA1109									KIAA1109_exon_chr4:123283185	0.9424	0.4277	-0.5146	NA	1	NA	NA	NA	NA	KIAA1109_exon_chr4:123283185
1	ZC3H15	360.8609	577.1358	0.6742	0.084	UP	No	No	3	ZC3H15_exon_chr2:187359959	0.1239	0.1394	0.0155	NA	1	NA	NA	NA	NA	ZC3H15_exon_chr2:187359959
2	ZC3H15									ZC3H15_exon_chr2:187364908	0.0587	0.1041	0.0454	NA	1	NA	NA	NA	NA	ZC3H15_exon_chr2:187364908
3	ZC3H15									ZC3H15_exon_chr2:187373269	0.8174	0.7565	-0.0609	NA	2	0.906	0.7604	-0.1456	NA	ZC3H15_exon_chr2:187373269
1	SNORD3A	7.6873	22.9479	1.6383	0.9365	NC	No	No	1	SNORD3A_exon_chr17:19091328	1.0	1.0	0.0	NA	2	NA	NA	NA	NA	SNORD3A_exon_chr17:19091328
1	COQ2	32.1415	57.6579	0.8636	1.0	NC	No	No	1	COQ2_exon_chr4:84185516	1.0	1.0	0.0	NA	3	0.8044	1.0	0.1956	NA	COQ2_exon_chr4:84185516
1	MORC2	50.8875	92.3757	0.8562	1.0	NC	No	No	1	MORC2_exon_chr22:31322858	1.0	1.0	0.0	NA	2	0.1961	0.3568	0.1608	NA	MORC2_exon_chr22:31322858
1	RRP7BP	11.0004	2.8666	-1.9491	0.983	NC	No	No	1	RRP7BP_exon_chr22:42970824	1.0	1.0	0.0	NA	1	NA	NA	NA	NA	RRP7BP_exon_chr22:42970824
1	AIF1L	512.6281	426.4403	-0.2693	0.6521	NC	No	No	1	AIF1L_exon_chr9:133995621	1.0	1.0	0.0	NA	5	0.6519	0.8102	0.1583	NA	AIF1L_exon_chr9:133995621
1	PCMTD1	68.4335	107.1608	0.6396	1.0	NC	No	No	2	PCMTD1_exon_chr8:52733278	0.8968	0.8595	-0.0373	NA	1	NA	NA	NA	NA	PCMTD1_exon_chr8:52733278
2	PCMTD1									PCMTD1_exon_chr8:52739921	0.1032	0.1405	0.0373	NA	5	0.7773	0.8259	0.0487	NA	PCMTD1_exon_chr8:52739921
1	GPR137	30.8953	41.9285	0.4295	1.0	NC	No	No	1	GPR137_exon_chr11:64056508	1.0	1.0	0.0	NA	1	NA	NA	NA	NA	GPR137_exon_chr11:64056508
1	PALM2AKAP2	59.3419	37.6073	-0.6736	1.0	NC	No	No	1	PALM2AKAP2_exon_chr9:112930678	1.0	1.0	0.0	NA	5	0.4679	0.1132	-0.3547	NA	PALM2AKAP2_exon_chr9:112930678
1	EMC4	760.2302	588.7187	-0.3722	0.3005	NC	No	No	1	EMC4_exon_chr15:34521953	1.0	1.0	0.0	NA	1	NA	NA	NA	NA	EMC4_exon_chr15:34521953
1	AZIN1	207.8505	158.4186	-0.3903	1.0	NC	No	No	1	AZIN1_exon_chr8:103840906	1.0	1.0	0.0	NA	9	0.4447	0.4351	-0.0096	NA	AZIN1_exon_chr8:103840906
1	SURF6	199.3292	153.2213	-0.3809	0.9291	NC	No	No	1	SURF6_exon_chr9:136199184	1.0	1.0	0.0	NA	8	0.2302	0.2421	0.0118	NA	SURF6_exon_chr9:136199184
1	MIR4724	213.0226	255.3006	0.2576	1.0	NC	No	No	1	MIR4724_exon_chr17:29858633	1.0	1.0	0.0	NA	5	0.3238	0.2395	-0.0842	NA	MIR4724_exon_chr17:29858633
1	SH3PXD2B	28.9454	53.6752	0.9052	1.0	NC	No	No	1	SH3PXD2B_exon_chr5:171766920	1.0	1.0	0.0	NA	3	NA	NA	NA	NA	SH3PXD2B_exon_chr5:171766920
1	NSMAF	42.1748	44.5232	0.1034	1.0	NC	No	No	1	NSMAF_exon_chr8:59496759	1.0	1.0	0.0	NA	1	NA	NA	NA	NA	NSMAF_exon_chr8:59496759
1	CDC42SE1	282.8071	187.6857	-0.5926	0.6048	NC	No	No	1	CDC42SE1_exon_chr1:151025803	1.0	1.0	0.0	NA	4	0.6763	0.7018	0.0255	NA	CDC42SE1_exon_chr1:151025803
1	UNK	42.4098	55.4214	0.3664	1.0	NC	No	No	2	UNK_exon_chr17:73789523	0.2872	0.2897	0.0025	NA	2	NA	NA	NA	NA	UNK_exon_chr17:73789523
2	UNK									UNK_exon_chr17:73820342	0.7128	0.7103	-0.0025	NA	1	NA	NA	NA	NA	UNK_exon_chr17:73820342
1	MAGEF1	168.8942	146.305	-0.1947	1.0	NC	No	No	1	MAGEF1_exon_chr3:184429852	1.0	1.0	0.0	NA	1	NA	NA	NA	NA	MAGEF1_exon_chr3:184429852
1	FDFT1	530.3796	498.611	-0.0866	0.8832	NC	No	No	1	FDFT1_exon_chr8:11695896	1.0	1.0	0.0	NA	4	0.4438	0.4179	-0.0259	NA	FDFT1_exon_chr8:11695896
1	ATP6V0B	307.4791	248.4364	-0.2984	0.9336	NC	No	No	1	ATP6V0B_exon_chr1:44442697	1.0	1.0	0.0	NA	1	NA	NA	NA	NA	ATP6V0B_exon_chr1:44442697
1	PSMD10	326.7405	211.2756	-0.633	0.7727	NC	No	No	1	PSMD10_exon_chrX:107328357	1.0	1.0	0.0	NA	1	NA	NA	NA	NA	PSMD10_exon_chrX:107328357
1	NSUN7	2.9432	3.3354	0.2046	1.0	NC	No	No	1	NSUN7_exon_chr4:40776783	1.0	1.0	0.0	NA	1	NA	NA	NA	NA	NSUN7_exon_chr4:40776783
1	HTATSF1	170.8355	280.0892	0.7116	0.4174	NC	No	No	1	HTATSF1_exon_chrX:135592966	1.0	1.0	0.0	NA	7	0.8749	0.5066	-0.3683	NA	HTATSF1_exon_chrX:135592966
1	TTF1	51.3639	42.9864	-0.2395	1.0	NC	No	No	3	TTF1_exon_chr9:135251555	0.6736	0.873	0.1994	NA	2	NA	NA	NA	NA	TTF1_exon_chr9:135251555
2	TTF1									TTF1_exon_chr9:135267593	0.3052	0.0	-0.3052	NA	1	NA	NA	NA	NA	TTF1_exon_chr9:135267593
3	TTF1									TTF1_exon_chr9:135278215	0.0212	0.127	0.1058	NA	1	NA	NA	NA	NA	TTF1_exon_chr9:135278215
1	PLEKHF2	117.6131	83.4357	-0.4965	1.0	NC	No	No	1	PLEKHF2_exon_chr8:96166258	1.0	1.0	0.0	NA	1	NA	NA	NA	NA	PLEKHF2_exon_chr8:96166258
1	SPC24	98.3353	115.6298	0.2437	1.0	NC	No	No	1	SPC24_exon_chr19:11257965	1.0	1.0	0.0	NA	2	0.5748	0.447	-0.1279	NA	SPC24_exon_chr19:11257965
1	TSKS	7.7633	31.6666	1.9784	1.0	NC	No	No	1	TSKS_exon_chr19:50243189	1.0	1.0	0.0	NA	1	NA	NA	NA	NA	TSKS_exon_chr19:50243189
1	RNF123	10.5178	2.0577	-2.3395	1.0	NC	No	No	1	RNF123_exon_chr3:49758617	1.0	1.0	0.0	NA	1	NA	NA	NA	NA	RNF123_exon_chr3:49758617
1	ORC6	77.5909	82.4799	0.0729	1.0	NC	No	No	1	ORC6_exon_chr16:46731369	1.0	1.0	0.0	NA	1	NA	NA	NA	NA	ORC6_exon_chr16:46731369
1	SDK1	14.6039	5.0902	-1.5313	0.9405	NC	No	No	1	SDK1_exon_chr7:4304755	1.0	1.0	0.0	NA	2	NA	NA	NA	NA	SDK1_exon_chr7:4304755
1	REPIN1	48.7225	52.7789	0.1372	1.0	NC	No	No	1	REPIN1_exon_chr7:150068316	1.0	1.0	0.0	NA	1	NA	NA	NA	NA	REPIN1_exon_chr7:150068316
1	AS3MT	1.8009	4.2205	1.2958	1.0	NC	No	No	1	AS3MT_exon_chr10:104660349	1.0	1.0	0.0	NA	1	NA	NA	NA	NA	AS3MT_exon_chr10:104660349
1	MIOS	74.517	67.0636	-0.1641	1.0	NC	No	No	2	MIOS_exon_chr7:7612066	0.2354	0.0	-0.2354	NA	1	NA	NA	NA	NA	MIOS_exon_chr7:7612066
2	MIOS									MIOS_exon_chr7:7646626	0.7646	1.0	0.2354	NA	3	0.2456	0.0719	-0.1737	NA	MIOS_exon_chr7:7646626
1	CCNG2	70.863	69.8646	-0.0277	1.0	NC	No	No	1	CCNG2_exon_chr4:78086953	1.0	1.0	0.0	NA	4	0.2337	0.1327	-0.101	NA	CCNG2_exon_chr4:78086953
1	TMEM168	86.6174	33.6222	-1.3548	1.0	NC	No	No	1	TMEM168_exon_chr7:112407799	1.0	1.0	0.0	NA	1	NA	NA	NA	NA	TMEM168_exon_chr7:112407799
1	HNRNPDL	492.8584	394.4075	-0.3213	0.6431	NC	No	No	1	HNRNPDL_exon_chr4:83346036	1.0	1.0	0.0	NA	4	0.0746	0.1181	0.0435	NA	HNRNPDL_exon_chr4:83346036
1	TGFB1	16.957	32.5723	0.9349	1.0	NC	No	No	1	TGFB1_exon_chr19:41837115	1.0	1.0	0.0	NA	1	NA	NA	NA	NA	TGFB1_exon_chr19:41837115
1	MMACHC	20.0569	19.7535	-0.0398	1.0	NC	No	No	1	MMACHC_exon_chr1:45974467	1.0	1.0	0.0	NA	3	NA	NA	NA	NA	MMACHC_exon_chr1:45974467
1	UBA6	126.1325	153.1684	0.2798	1.0	NC	No	No	1	UBA6_exon_chr4:68484850	1.0	1.0	0.0	NA	9	0.8589	0.626	-0.2329	NA	UBA6_exon_chr4:68484850
1	ICAM1	4.8025	2.7685	-0.7645	1.0	NC	No	No	1	ICAM1_exon_chr19:10395790	1.0	1.0	0.0	NA	2	NA	NA	NA	NA	ICAM1_exon_chr19:10395790
1	MAT2B	270.667	174.7144	-0.6276	0.5516	NC	No	No	1	MAT2B_exon_chr5:162945198	1.0	1.0	0.0	NA	2	0.4524	0.3535	-0.0989	NA	MAT2B_exon_chr5:162945198
1	FGD1	2.2053	15.7715	2.7606	0.7976	NC	No	No	1	FGD1_exon_chrX:54472847	1.0	1.0	0.0	NA	1	NA	NA	NA	NA	FGD1_exon_chrX:54472847
1	AHCY	1057.3879	842.7623	-0.3222	0.5588	NC	No	No	1	AHCY_exon_chr20:32868971	1.0	1.0	0.0	NA	1	NA	NA	NA	NA	AHCY_exon_chr20:32868971
1	GSTM2	4.8777	8.5591	0.7907	1.0	NC	No	No	1	GSTM2_exon_chr1:110217368	1.0	1.0	0.0	NA	1	NA	NA	NA	NA	GSTM2_exon_chr1:110217368
1	TCEA1	247.2832	168.8221	-0.56	0.5553	NC	No	No	2	TCEA1_exon_chr8:54880672	0.9809	0.847	-0.1339	NA	1	NA	NA	NA	NA	TCEA1_exon_chr8:54880672
2	TCEA1									TCEA1_exon_chr8:54906315	0.0191	0.1117	0.0926	NA	1	NA	NA	NA	NA	TCEA1_exon_chr8:54906315
1	SLC9A3-AS1	9.1629	7.7302	-0.2603	1.0	NC	No	No	1	SLC9A3-AS1_exon_chr5:480476	1.0	1.0	0.0	NA	1	NA	NA	NA	NA	SLC9A3-AS1_exon_chr5:480476
1	CDCA7	237.0877	216.3946	-0.1248	1.0	NC	No	No	1	CDCA7_exon_chr2:174232361	1.0	1.0	0.0	NA	3	0.0624	0.1057	0.0433	NA	CDCA7_exon_chr2:174232361
1	HBE1	1.3549	25.2936	4.1365	0.3527	NC	No	No	1	HBE1_exon_chr11:5289827	1.0	1.0	0.0	NA	1	NA	NA	NA	NA	HBE1_exon_chr11:5289827
1	GTPBP3	149.1091	70.8087	-1.0642	1.0	NC	No	No	1	GTPBP3_exon_chr19:17452286	1.0	1.0	0.0	NA	1	NA	NA	NA	NA	GTPBP3_exon_chr19:17452286
1	SYNE2	402.2604	705.4112	0.8075	0.0025	UP	No	No	3	SYNE2_exon_chr14:64491629	0.0422	0.1011	0.0589	NA	1	NA	NA	NA	NA	SYNE2_exon_chr14:64491629
2	SYNE2									SYNE2_exon_chr14:64518274	0.1845	0.1209	-0.0636	NA	1	NA	NA	NA	NA	SYNE2_exon_chr14:64518274
3	SYNE2									SYNE2_exon_chr14:64692036	0.6055	0.5368	-0.0687	NA	3	0.8086	0.6754	-0.1332	NA	SYNE2_exon_chr14:64692036
1	TUT7	75.7629	104.0942	0.4846	1.0	NC	No	Yes	3	TUT7_exon_chr9:88903659	0.3516	0.309	-0.0426	NA	1	NA	NA	NA	NA	TUT7_exon_chr9:88903659
2	TUT7									TUT7_exon_chr9:88916516	0.0989	0.4685	0.3696	NA	2	NA	NA	NA	Shortening	TUT7_exon_chr9:88916516
3	TUT7									TUT7_exon_chr9:88938875	0.5495	0.2225	-0.327	NA	1	NA	NA	NA	NA	TUT7_exon_chr9:88938875
1	NCAPG	331.4855	309.5282	-0.0905	0.9125	NC	No	No	1	NCAPG_exon_chr4:17844924	1.0	1.0	0.0	NA	1	NA	NA	NA	NA	NCAPG_exon_chr4:17844924
1	ZNF397	19.1179	17.9141	-0.0829	1.0	NC	No	No	2	ZNF397_exon_chr18:32825225	0.4387	1.0	0.5613	NA	1	NA	NA	NA	NA	ZNF397_exon_chr18:32825225
2	ZNF397									ZNF397_exon_chr18:32837891	0.5613	0.0	-0.5613	NA	2	NA	NA	NA	NA	ZNF397_exon_chr18:32837891
1	SMURF2P1-LRRC37BP1	0.0	4.5011	4.6277	1.0	NC	No	No	1	SMURF2P1-LRRC37BP1_exon_chr17:28961011	1.0	1.0	0.0	NA	1	NA	NA	NA	NA	SMURF2P1-LRRC37BP1_exon_chr17:28961011
1	FRG1BP	9.4299	14.206	0.6279	1.0	NC	No	No	1	FRG1BP_exon_chr20:29631537	1.0	1.0	0.0	NA	1	NA	NA	NA	NA	FRG1BP_exon_chr20:29631537
1	LINC00240	4.9469	8.5239	0.7637	1.0	NC	No	No	1	LINC00240_exon_chr6:26991032	1.0	1.0	0.0	NA	1	NA	NA	NA	NA	LINC00240_exon_chr6:26991032
1	CRTAP	150.9386	91.2241	-0.7241	1.0	NC	No	No	1	CRTAP_exon_chr3:33183886	1.0	1.0	0.0	NA	3	0.0788	0.1451	0.0663	NA	CRTAP_exon_chr3:33183886
1	CHD6	62.7148	38.8212	-0.6958	1.0	NC	No	No	2	CHD6_exon_chr20:40034129	0.885	0.7124	-0.1726	NA	4	NA	NA	NA	NA	CHD6_exon_chr20:40034129
2	CHD6									CHD6_exon_chr20:40162209	0.115	0.2479	0.1328	NA	2	NA	NA	NA	NA	CHD6_exon_chr20:40162209
1	FUT8	258.8353	231.9022	-0.1602	1.0	NC	No	No	1	FUT8_exon_chr14:66208810	1.0	1.0	0.0	NA	5	0.1047	0.0732	-0.0314	NA	FUT8_exon_chr14:66208810
1	NOB1	230.2968	205.6856	-0.1542	1.0	NC	No	No	1	NOB1_exon_chr16:69776504	1.0	1.0	0.0	NA	2	0.9666	0.8893	-0.0772	NA	NOB1_exon_chr16:69776504
1	SIAH1	100.7794	97.5305	-0.0396	1.0	NC	No	No	1	SIAH1_exon_chr16:48396341	1.0	1.0	0.0	NA	5	0.656	0.8591	0.2031	NA	SIAH1_exon_chr16:48396341
1	WDCP	40.9793	79.5034	0.9265	1.0	NC	No	No	1	WDCP_exon_chr2:24254032	1.0	1.0	0.0	NA	1	NA	NA	NA	NA	WDCP_exon_chr2:24254032
1	ZNF726	14.0692	32.4614	1.2007	1.0	NC	No	No	3	ZNF726_exon_chr19:24102788	0.5522	0.7027	0.1505	NA	2	NA	NA	NA	NA	ZNF726_exon_chr19:24102788
2	ZNF726									ZNF726_exon_chr19:24106234	0.0	0.1944	0.1944	NA	2	NA	NA	NA	NA	ZNF726_exon_chr19:24106234
3	ZNF726									ZNF726_exon_chr19:24126295	0.4478	0.1029	-0.3449	NA	1	NA	NA	NA	NA	ZNF726_exon_chr19:24126295
1	SPEG	3.2013	9.4662	1.5337	1.0	NC	No	No	1	SPEG_exon_chr2:220330778	1.0	1.0	0.0	NA	1	NA	NA	NA	NA	SPEG_exon_chr2:220330778
1	SYT8	7.8166	0.7717	-3.3036	1.0	NC	No	No	1	SYT8_exon_chr11:1858421	1.0	1.0	0.0	NA	1	NA	NA	NA	NA	SYT8_exon_chr11:1858421
1	PGLS	195.9918	165.403	-0.242	1.0	NC	No	No	1	PGLS_exon_chr19:17631752	1.0	1.0	0.0	NA	1	NA	NA	NA	NA	PGLS_exon_chr19:17631752
1	CYB561D2	26.3571	52.2477	0.9683	1.0	NC	No	No	1	CYB561D2_exon_chr3:50390671	1.0	1.0	0.0	NA	1	NA	NA	NA	NA	CYB561D2_exon_chr3:50390671
1	TP53INP1	15.3103	6.9094	-1.1628	0.9388	NC	No	No	1	TP53INP1_exon_chr8:95942956	1.0	1.0	0.0	NA	2	NA	NA	NA	NA	TP53INP1_exon_chr8:95942956
1	ZBTB26	9.5838	11.9623	0.2915	1.0	NC	No	No	1	ZBTB26_exon_chr9:125682223	1.0	1.0	0.0	NA	1	NA	NA	NA	NA	ZBTB26_exon_chr9:125682223
1	NCOR2	292.7586	252.3266	-0.2037	1.0	NC	No	No	1	NCOR2_exon_chr12:124810129	1.0	1.0	0.0	NA	1	NA	NA	NA	NA	NCOR2_exon_chr12:124810129
1	LRATD2	11.0765	3.3134	-1.711	1.0	NC	No	No	1	LRATD2_exon_chr8:127569730	1.0	1.0	0.0	NA	2	NA	NA	NA	NA	LRATD2_exon_chr8:127569730
1	TAF1D	353.0935	444.9903	0.3377	0.5944	NC	No	No	2	TAF1D_exon_chr11:93469470	0.516	0.5688	0.0528	NA	4	0.7951	0.7856	-0.0095	NA	TAF1D_exon_chr11:93469470
2	TAF1D									TAF1D_exon_chr11:93471665	0.484	0.4312	-0.0528	NA	2	0.8447	0.8744	0.0297	NA	TAF1D_exon_chr11:93471665
1	FAM218A	17.6426	0.0	-6.68099888088141	NA	NC	No	No	1	FAM218A_exon_chr4:165878099	1.0	1.0	0.0	NA	1	NA	NA	NA	NA	FAM218A_exon_chr4:165878099
1	ADGRL3	27.1059	5.2729	-2.3417	0.7061	NC	No	No	1	ADGRL3_exon_chr4:62935826	1.0	1.0	0.0	NA	4	NA	NA	NA	NA	ADGRL3_exon_chr4:62935826
1	PIAS2	34.5576	16.4991	-1.058	1.0	NC	No	No	2	PIAS2_exon_chr18:44392578	0.8488	1.0	0.1512	NA	1	NA	NA	NA	NA	PIAS2_exon_chr18:44392578
2	PIAS2									PIAS2_exon_chr18:44398410	0.1512	0.0	-0.1512	NA	5	NA	NA	NA	NA	PIAS2_exon_chr18:44398410
1	TM2D1	51.3425	50.4479	-0.0328	1.0	NC	No	No	1	TM2D1_exon_chr1:62147022	1.0	1.0	0.0	NA	1	NA	NA	NA	NA	TM2D1_exon_chr1:62147022
1	C15orf48	6.0031	0.0	-5.1024	1.0	NC	No	No	1	C15orf48_exon_chr15:45725145	1.0	1.0	0.0	NA	1	NA	NA	NA	NA	C15orf48_exon_chr15:45725145
1	SUCLA2	138.775	135.072	-0.0364	1.0	NC	No	No	1	SUCLA2_exon_chr13:48517580	1.0	1.0	0.0	NA	1	NA	NA	NA	NA	SUCLA2_exon_chr13:48517580
1	SLC35B4	42.231	44.5256	0.0586	1.0	NC	No	No	1	SLC35B4_exon_chr7:133979831	1.0	1.0	0.0	NA	5	0.3924	0.238	-0.1544	NA	SLC35B4_exon_chr7:133979831
1	ASPM	218.0512	337.2407	0.6181	0.8488	NC	Yes	No	3	ASPM_exon_chr1:197053556	0.7146	0.4258	-0.2888	NA	2	NA	NA	NA	NA	ASPM_exon_chr1:197053556
2	ASPM									ASPM_exon_chr1:197074315	0.1478	0.2169	0.0692	NA	5	NA	NA	NA	NA	ASPM_exon_chr1:197074315
3	ASPM									ASPM_exon_chr1:197112940	0.0686	0.306	0.2374	Up	2	0.3649	0.4026	0.0377	NA	ASPM_exon_chr1:197112940
1	MTRNR2L9	663.3873	632.9256	-0.0711	0.8888	NC	No	No	1	MTRNR2L9_exon_chr6:62284034	1.0	1.0	0.0	NA	1	NA	NA	NA	NA	MTRNR2L9_exon_chr6:62284034
1	CERS2	226.0174	208.3206	-0.1161	1.0	NC	No	No	1	CERS2_exon_chr1:150938764	1.0	1.0	0.0	NA	3	0.3372	0.3549	0.0177	NA	CERS2_exon_chr1:150938764
1	ING3	58.766	27.1297	-1.1044	1.0	NC	No	No	2	ING3_exon_chr7:120596213	0.295	0.1043	-0.1907	NA	2	NA	NA	NA	NA	ING3_exon_chr7:120596213
2	ING3									ING3_exon_chr7:120614781	0.705	0.8957	0.1907	NA	1	NA	NA	NA	NA	ING3_exon_chr7:120614781
1	PATZ1	15.2261	12.7865	-0.2755	1.0	NC	No	No	2	PATZ1_exon_chr22:31723295	0.6079	1.0	0.3921	NA	1	NA	NA	NA	NA	PATZ1_exon_chr22:31723295
2	PATZ1									PATZ1_exon_chr22:31737669	0.3921	0.0	-0.3921	NA	1	NA	NA	NA	NA	PATZ1_exon_chr22:31737669
1	CGB5	209.6027	221.2457	0.0773	1.0	NC	No	No	1	CGB5_exon_chr19:49548236	1.0	1.0	0.0	NA	1	NA	NA	NA	NA	CGB5_exon_chr19:49548236
1	TNPO2	27.3637	54.7922	0.9937	1.0	NC	No	No	1	TNPO2_exon_chr19:12812057	1.0	1.0	0.0	NA	1	NA	NA	NA	NA	TNPO2_exon_chr19:12812057
1	CDKN2D	1.0839	12.2816	3.4461	0.7134	NC	No	No	1	CDKN2D_exon_chr19:10678093	1.0	1.0	0.0	NA	1	NA	NA	NA	NA	CDKN2D_exon_chr19:10678093
1	IDH3B	204.4177	243.6215	0.2543	0.9913	NC	No	No	1	IDH3B_exon_chr20:2639958	1.0	1.0	0.0	NA	1	NA	NA	NA	NA	IDH3B_exon_chr20:2639958
1	NBPF3	17.1583	6.9281	-1.3291	0.9352	NC	No	No	1	NBPF3_exon_chr1:21809635	1.0	1.0	0.0	NA	1	NA	NA	NA	NA	NBPF3_exon_chr1:21809635
1	PTMA	4.0647	11.5743	1.4906	0.9487	NC	No	No	2	PTMA_exon_chr2:232573234	1.0	0.1114	-0.8886	NA	1	NA	NA	NA	NA	PTMA_exon_chr2:232573234
2	PTMA									PTMA_exon_chr2:232576057	0.0	0.8886	0.8886	NA	1	NA	NA	NA	NA	PTMA_exon_chr2:232576057
1	TRIM45	2.4388	0.0	-3.835	1.0	NC	No	No	1	TRIM45_exon_chr1:117655075	1.0	1.0	0.0	NA	1	NA	NA	NA	NA	TRIM45_exon_chr1:117655075
1	GZF1	35.9096	11.1889	-1.6756	1.0	NC	No	No	1	GZF1_exon_chr20:23350727	1.0	1.0	0.0	NA	3	NA	NA	NA	NA	GZF1_exon_chr20:23350727
1	PIK3CA	47.978	16.4345	-1.5429	1.0	NC	No	No	1	PIK3CA_exon_chr3:178951881	1.0	1.0	0.0	NA	4	NA	NA	NA	NA	PIK3CA_exon_chr3:178951881
1	ZC3H14	206.1959	179.4382	-0.2019	1.0	NC	No	No	1	ZC3H14_exon_chr14:89078088	1.0	1.0	0.0	NA	6	0.2177	0.2203	0.0026	NA	ZC3H14_exon_chr14:89078088
1	PABPC3	7.6299	3.2186	-1.2559	1.0	NC	No	No	1	PABPC3_exon_chr13:25670275	1.0	1.0	0.0	NA	1	NA	NA	NA	NA	PABPC3_exon_chr13:25670275
1	GINS1	35.243	11.8302	-1.5699	1.0	NC	No	No	1	GINS1_exon_chr20:25426558	1.0	1.0	0.0	NA	1	NA	NA	NA	NA	GINS1_exon_chr20:25426558
1	OST4	1227.4664	1258.7208	0.0375	0.9199	NC	No	No	1	OST4_exon_chr2:27293589	1.0	1.0	0.0	NA	2	0.9395	0.918	-0.0216	NA	OST4_exon_chr2:27293589
1	NARS2	52.1867	54.2446	0.0528	1.0	NC	No	No	1	NARS2_exon_chr11:78147860	1.0	1.0	0.0	NA	2	NA	NA	NA	NA	NARS2_exon_chr11:78147860
1	MTRNR2L2	316.7007	399.5948	0.334	0.6329	NC	No	No	1	MTRNR2L2_exon_chr5:79946827	1.0	1.0	0.0	NA	7	0.4164	0.468	0.0516	NA	MTRNR2L2_exon_chr5:79946827
1	CASC9	21.1548	13.1181	-0.6781	1.0	NC	No	No	1	CASC9_exon_chr8:76136593	1.0	1.0	0.0	NA	2	NA	NA	NA	NA	CASC9_exon_chr8:76136593
1	TMEM186	7.8058	12.1903	0.6312	1.0	NC	No	No	1	TMEM186_exon_chr16:8890447	1.0	1.0	0.0	NA	1	NA	NA	NA	NA	TMEM186_exon_chr16:8890447
1	SNORA36C	1.9848	0.0	-3.5513	1.0	NC	No	No	1	SNORA36C_exon_chr2:69747303	1.0	1.0	0.0	NA	1	NA	NA	NA	NA	SNORA36C_exon_chr2:69747303
1	DTWD1	55.0381	86.355	0.6441	1.0	NC	No	No	1	DTWD1_exon_chr15:49935527	1.0	1.0	0.0	NA	5	0.0017	0.1574	0.1557	NA	DTWD1_exon_chr15:49935527
1	PPAT	96.7513	99.7334	0.0588	1.0	NC	No	No	1	PPAT_exon_chr4:57261714	1.0	1.0	0.0	NA	3	0.8781	1.0	0.1219	NA	PPAT_exon_chr4:57261714
1	TTC9C	40.3296	59.7971	0.5662	1.0	NC	No	No	1	TTC9C_exon_chr11:62505759	1.0	1.0	0.0	NA	1	NA	NA	NA	NA	TTC9C_exon_chr11:62505759
1	MKRN2	53.4356	60.7236	0.1683	1.0	NC	No	No	1	MKRN2_exon_chr3:12623614	1.0	1.0	0.0	NA	3	0.8485	0.73	-0.1185	NA	MKRN2_exon_chr3:12623614
1	EOMES	7.057	5.7722	-0.2984	1.0	NC	No	No	1	EOMES_exon_chr3:27759299	1.0	1.0	0.0	NA	1	NA	NA	NA	NA	EOMES_exon_chr3:27759299
1	STYX	209.0253	122.164	-0.7696	0.4304	NC	No	No	1	STYX_exon_chr14:53237750	1.0	1.0	0.0	NA	9	0.5608	0.4366	-0.1241	NA	STYX_exon_chr14:53237750
1	GMPPB	91.9572	90.3764	-0.0256	1.0	NC	No	No	1	GMPPB_exon_chr3:49759580	1.0	1.0	0.0	NA	2	0.2299	0.0633	-0.1666	NA	GMPPB_exon_chr3:49759580
1	CEP170B	37.7739	47.6189	0.3381	1.0	NC	No	No	1	CEP170B_exon_chr14:105361047	1.0	1.0	0.0	NA	1	NA	NA	NA	NA	CEP170B_exon_chr14:105361047
1	CNKSR1	33.0147	28.764	-0.1749	1.0	NC	No	No	1	CNKSR1_exon_chr1:26515769	1.0	1.0	0.0	NA	1	NA	NA	NA	NA	CNKSR1_exon_chr1:26515769
1	VRK3	32.1197	52.6008	0.7357	1.0	NC	No	No	2	VRK3_exon_chr19:50480041	1.0	0.9	-0.1	NA	1	NA	NA	NA	NA	VRK3_exon_chr19:50480041
2	VRK3									VRK3_exon_chr19:50485445	0.0	0.1	0.1	NA	1	NA	NA	NA	NA	VRK3_exon_chr19:50485445
1	AKIRIN2	81.776	95.0648	0.2354	1.0	NC	No	No	1	AKIRIN2_exon_chr6:88385325	1.0	1.0	0.0	NA	4	0.6496	0.6786	0.029	NA	AKIRIN2_exon_chr6:88385325
1	ARHGEF7	91.9605	89.9588	-0.0314	1.0	NC	No	No	1	ARHGEF7_exon_chr13:111955337	1.0	1.0	0.0	NA	4	0.7599	0.9339	0.174	NA	ARHGEF7_exon_chr13:111955337
1	ERG28	444.2276	359.9651	-0.3071	0.628	NC	No	No	1	ERG28_exon_chr14:76117977	1.0	1.0	0.0	NA	1	NA	NA	NA	NA	ERG28_exon_chr14:76117977
1	XRCC4	55.1751	90.8145	0.7034	1.0	NC	No	No	1	XRCC4_exon_chr5:82648943	1.0	1.0	0.0	NA	1	NA	NA	NA	NA	XRCC4_exon_chr5:82648943
1	SCARB1	6.8408	10.4868	0.6018	1.0	NC	No	No	1	SCARB1_exon_chr12:125263132	1.0	1.0	0.0	NA	1	NA	NA	NA	NA	SCARB1_exon_chr12:125263132
1	FANCL	65.7504	70.5318	0.0843	1.0	NC	No	No	1	FANCL_exon_chr2:58386935	1.0	1.0	0.0	NA	3	NA	NA	NA	NA	FANCL_exon_chr2:58386935
1	POMGNT1	43.8175	74.989	0.7777	1.0	NC	No	No	1	POMGNT1_exon_chr1:46655029	1.0	1.0	0.0	NA	1	NA	NA	NA	NA	POMGNT1_exon_chr1:46655029
1	FBXO8	70.9225	84.6659	0.2524	1.0	NC	No	No	1	FBXO8_exon_chr4:175158750	1.0	1.0	0.0	NA	2	0.4862	0.5262	0.04	NA	FBXO8_exon_chr4:175158750
1	SLC25A42	6.5036	5.1884	-0.3408	1.0	NC	No	No	1	SLC25A42_exon_chr19:19221377	1.0	1.0	0.0	NA	1	NA	NA	NA	NA	SLC25A42_exon_chr19:19221377
1	IFT88	19.569	42.1675	1.1036	1.0	NC	No	No	1	IFT88_exon_chr13:21265192	1.0	1.0	0.0	NA	1	NA	NA	NA	NA	IFT88_exon_chr13:21265192
1	C16orf87	154.9919	137.959	-0.1812	1.0	NC	No	No	2	C16orf87_exon_chr16:46836982	1.0	0.8924	-0.1076	NA	1	NA	NA	NA	NA	C16orf87_exon_chr16:46836982
2	C16orf87									C16orf87_exon_chr16:46843697	0.0	0.1076	0.1076	NA	1	NA	NA	NA	NA	C16orf87_exon_chr16:46843697
1	ENO3	6.2482	7.9738	0.3682	1.0	NC	No	No	1	ENO3_exon_chr17:4860272	1.0	1.0	0.0	NA	1	NA	NA	NA	NA	ENO3_exon_chr17:4860272
1	FRS2	145.4421	112.7111	-0.3549	0.9439	NC	No	No	1	FRS2_exon_chr12:69967784	1.0	1.0	0.0	NA	10	0.559	0.5399	-0.0192	NA	FRS2_exon_chr12:69967784
1	PHC2	102.4154	130.4629	0.3335	1.0	NC	No	No	1	PHC2_exon_chr1:33790620	1.0	1.0	0.0	NA	1	NA	NA	NA	NA	PHC2_exon_chr1:33790620
1	C11orf54	34.7872	46.1049	0.4027	1.0	NC	No	No	1	C11orf54_exon_chr11:93494680	1.0	1.0	0.0	NA	6	NA	NA	NA	NA	C11orf54_exon_chr11:93494680
1	MARS2	41.9465	16.2606	-1.348	1.0	NC	No	No	1	MARS2_exon_chr2:198570092	1.0	1.0	0.0	NA	1	NA	NA	NA	NA	MARS2_exon_chr2:198570092
1	NFIC	26.4318	19.1626	-0.4579	1.0	NC	No	No	1	NFIC_exon_chr19:3462749	1.0	1.0	0.0	NA	1	NA	NA	NA	NA	NFIC_exon_chr19:3462749
1	ST8SIA6-AS1	88.9667	89.9209	0.0188	1.0	NC	No	No	1	ST8SIA6-AS1_exon_chr10:17449966	1.0	1.0	0.0	NA	1	NA	NA	NA	NA	ST8SIA6-AS1_exon_chr10:17449966
1	FANCG	38.8754	29.5815	-0.3726	1.0	NC	No	No	1	FANCG_exon_chr9:35074213	1.0	1.0	0.0	NA	1	NA	NA	NA	NA	FANCG_exon_chr9:35074213
1	LIMK2	170.5063	170.6813	0.0022	1.0	NC	No	No	2	LIMK2_exon_chr22:31672774	0.2302	0.2721	0.0419	NA	2	0.8027	0.676	-0.1267	NA	LIMK2_exon_chr22:31672774
2	LIMK2									LIMK2_exon_chr22:31674282	0.7698	0.7279	-0.0419	NA	3	0.7112	0.3813	-0.3298	NA	LIMK2_exon_chr22:31674282
1	BLZF1	47.0681	51.3473	0.1163	1.0	NC	No	No	1	BLZF1_exon_chr1:169356234	1.0	1.0	0.0	NA	4	NA	NA	NA	NA	BLZF1_exon_chr1:169356234
1	LRSAM1	20.915	10.3278	-1.0262	1.0	NC	No	No	2	LRSAM1_exon_chr9:130242117	0.1298	0.3589	0.2291	NA	1	NA	NA	NA	NA	LRSAM1_exon_chr9:130242117
2	LRSAM1									LRSAM1_exon_chr9:130265052	0.8702	0.6411	-0.2291	NA	1	NA	NA	NA	NA	LRSAM1_exon_chr9:130265052
1	SNHG1	250.9621	238.5883	-0.0672	1.0	NC	No	No	1	SNHG1_exon_chr11:62620153	1.0	1.0	0.0	NA	1	NA	NA	NA	NA	SNHG1_exon_chr11:62620153
1	SNRPE	2916.4963	3311.1052	0.1812	0.4831	NC	No	No	1	SNRPE_exon_chr1:203839004	1.0	1.0	0.0	NA	1	NA	NA	NA	NA	SNRPE_exon_chr1:203839004
1	ACER2	18.4815	9.5167	-0.9682	0.9703	NC	No	No	1	ACER2_exon_chr9:19450447	1.0	1.0	0.0	NA	1	NA	NA	NA	NA	ACER2_exon_chr9:19450447
1	C11orf95	7.6448	2.8935	-1.3828	1.0	NC	No	No	1	C11orf95_exon_chr11:63531341	1.0	1.0	0.0	NA	1	NA	NA	NA	NA	C11orf95_exon_chr11:63531341
1	BABAM1	132.2838	121.128	-0.1418	1.0	NC	No	No	1	BABAM1_exon_chr19:17389653	1.0	1.0	0.0	NA	1	NA	NA	NA	NA	BABAM1_exon_chr19:17389653
1	KDSR	21.0608	34.327	0.6811	1.0	NC	No	No	1	KDSR_exon_chr18:60999134	1.0	1.0	0.0	NA	3	NA	NA	NA	NA	KDSR_exon_chr18:60999134
1	TTLL4	172.9294	163.5905	-0.0796	1.0	NC	No	No	1	TTLL4_exon_chr2:219618856	1.0	1.0	0.0	NA	1	NA	NA	NA	NA	TTLL4_exon_chr2:219618856
1	ZNF281	101.4093	106.3575	0.0712	1.0	NC	No	No	1	ZNF281_exon_chr1:200378851	1.0	1.0	0.0	NA	6	0.705	0.6225	-0.0824	NA	ZNF281_exon_chr1:200378851
1	MPDZ	31.4574	72.1484	1.1874	1.0	NC	No	No	2	MPDZ_exon_chr9:13107110	0.8772	0.4646	-0.4126	NA	1	NA	NA	NA	NA	MPDZ_exon_chr9:13107110
2	MPDZ									MPDZ_exon_chr9:13206098	0.1228	0.5354	0.4126	NA	2	NA	NA	NA	NA	MPDZ_exon_chr9:13206098
1	FHL2	279.5367	221.1319	-0.3313	0.9305	NC	No	No	1	FHL2_exon_chr2:105977891	1.0	1.0	0.0	NA	1	NA	NA	NA	NA	FHL2_exon_chr2:105977891
1	TRIL	13.8071	8.5239	-0.6864	1.0	NC	No	No	1	TRIL_exon_chr7:28997497	1.0	1.0	0.0	NA	2	NA	NA	NA	NA	TRIL_exon_chr7:28997497
1	ZFP91-CNTF	125.4343	113.7111	-0.1262	1.0	NC	No	No	1	ZFP91-CNTF_exon_chr11:58384668	1.0	1.0	0.0	NA	4	0.8555	0.9149	0.0595	NA	ZFP91-CNTF_exon_chr11:58384668
1	USPL1	57.0598	32.2651	-0.81	1.0	NC	No	No	1	USPL1_exon_chr13:31231610	1.0	1.0	0.0	NA	1	NA	NA	NA	NA	USPL1_exon_chr13:31231610
1	PLEKHB1	1.1027	0.0	-2.723	1.0	NC	No	No	1	PLEKHB1_exon_chr11:73372510	1.0	1.0	0.0	NA	1	NA	NA	NA	NA	PLEKHB1_exon_chr11:73372510
1	KIFC1	119.5799	193.2395	0.6973	0.6932	NC	No	No	1	KIFC1_exon_chr6:33377422	1.0	1.0	0.0	NA	1	NA	NA	NA	NA	KIFC1_exon_chr6:33377422
1	SELENOS	219.863	188.9945	-0.2123	1.0	NC	No	No	3	SELENOS_exon_chr15:101811850	0.0737	0.0367	-0.0369	NA	2	0.8918	0.9347	0.0429	NA	SELENOS_exon_chr15:101811850
2	SELENOS									SELENOS_exon_chr15:101813061	0.8444	0.6654	-0.179	NA	2	NA	NA	NA	NA	SELENOS_exon_chr15:101813061
3	SELENOS									SELENOS_exon_chr15:101815566	0.082	0.2979	0.2159	NA	1	NA	NA	NA	NA	SELENOS_exon_chr15:101815566
1	GPATCH2	1.2006	9.4562	3.1252	1.0	NC	No	No	2	GPATCH2_exon_chr1:217604707	1.0	0.6464	-0.3536	NA	2	NA	NA	NA	NA	GPATCH2_exon_chr1:217604707
2	GPATCH2									GPATCH2_exon_chr1:217793841	0.0	0.3536	0.3536	NA	1	NA	NA	NA	NA	GPATCH2_exon_chr1:217793841
1	DBNL	93.0171	57.9157	-0.6989	1.0	NC	No	No	1	DBNL_exon_chr7:44100375	1.0	1.0	0.0	NA	7	0.4289	0.3927	-0.0362	NA	DBNL_exon_chr7:44100375
1	KRBOX4	10.5026	9.7438	-0.1111	1.0	NC	No	No	1	KRBOX4_exon_chrX:46332184	1.0	1.0	0.0	NA	3	NA	NA	NA	NA	KRBOX4_exon_chrX:46332184
1	CC2D2A	24.9202	1.853	-3.78462403002266	NA	NC	No	No	3	CC2D2A_exon_chr4:15482820	0.7965	0.0	-0.7965	NA	1	NA	NA	NA	NA	CC2D2A_exon_chr4:15482820
2	CC2D2A									CC2D2A_exon_chr4:15530242	0.2035	0.0	-0.2035	NA	2	NA	NA	NA	NA	CC2D2A_exon_chr4:15530242
3	CC2D2A									CC2D2A_exon_chr4:15602859	0.0	1.0	1.0	NA	1	NA	NA	NA	NA	CC2D2A_exon_chr4:15602859
1	MSH3	55.1873	91.8056	0.7194	1.0	NC	No	No	2	MSH3_exon_chr5:80168934	0.0523	0.2505	0.1981	NA	1	NA	NA	NA	NA	MSH3_exon_chr5:80168934
2	MSH3									MSH3_exon_chr5:80171569	0.9477	0.6808	-0.2668	NA	2	NA	NA	NA	NA	MSH3_exon_chr5:80171569
1	CCDC117	73.9789	46.7928	-0.6676	1.0	NC	No	No	1	CCDC117_exon_chr22:29182076	1.0	1.0	0.0	NA	2	0.9946	0.7578	-0.2368	NA	CCDC117_exon_chr22:29182076
1	TMCO3	174.4553	127.5846	-0.4631	1.0	NC	No	No	1	TMCO3_exon_chr13:114203739	1.0	1.0	0.0	NA	1	NA	NA	NA	NA	TMCO3_exon_chr13:114203739
1	SPRYD7	146.1478	103.6094	-0.4916	1.0	NC	No	No	1	SPRYD7_exon_chr13:50489296	1.0	1.0	0.0	NA	8	0.2061	0.2582	0.0521	NA	SPRYD7_exon_chr13:50489296
1	NCSTN	141.3798	99.1736	-0.5138	1.0	NC	No	No	1	NCSTN_exon_chr1:160327938	1.0	1.0	0.0	NA	1	NA	NA	NA	NA	NCSTN_exon_chr1:160327938
1	XPNPEP1	170.2579	75.6001	-1.1723	0.9499	NC	No	No	1	XPNPEP1_exon_chr10:111625070	1.0	1.0	0.0	NA	1	NA	NA	NA	NA	XPNPEP1_exon_chr10:111625070
1	SPPL3	71.8241	97.3122	0.4227	1.0	NC	No	No	1	SPPL3_exon_chr12:121202873	1.0	1.0	0.0	NA	4	0.3885	0.5158	0.1273	NA	SPPL3_exon_chr12:121202873
1	MTLN	201.196	102.5234	-0.9794	0.5277	NC	No	No	1	MTLN_exon_chr2:110969199	1.0	1.0	0.0	NA	1	NA	NA	NA	NA	MTLN_exon_chr2:110969199
1	H2AC11	4.4107	0.0	-4.6882	1.0	NC	No	No	1	H2AC11_exon_chr6:27100816	1.0	1.0	0.0	NA	1	NA	NA	NA	NA	H2AC11_exon_chr6:27100816
1	GNG12	237.3444	296.1341	0.3143	1.0	NC	No	No	1	GNG12_exon_chr1:68171259	1.0	1.0	0.0	NA	6	0.8809	0.9311	0.0502	NA	GNG12_exon_chr1:68171259
1	DCAF16	69.7525	90.1676	0.3923	1.0	NC	No	No	1	DCAF16_exon_chr4:17806394	1.0	1.0	0.0	NA	3	0.5109	0.4539	-0.057	NA	DCAF16_exon_chr4:17806394
1	SYNJ2BP-COX16	723.9968	841.6156	0.2151	0.646	NC	No	No	2	SYNJ2BP-COX16_exon_chr14:70793166	0.8278	0.821	-0.0068	NA	3	0.876	0.8671	-0.0089	NA	SYNJ2BP-COX16_exon_chr14:70793166
2	SYNJ2BP-COX16									SYNJ2BP-COX16_exon_chr14:70839848	0.1722	0.179	0.0068	NA	8	0.8818	0.5869	-0.295	NA	SYNJ2BP-COX16_exon_chr14:70839848
1	PRKCD	42.6328	61.1963	0.5195	1.0	NC	No	No	1	PRKCD_exon_chr3:53226123	1.0	1.0	0.0	NA	4	0.6118	0.5914	-0.0204	NA	PRKCD_exon_chr3:53226123
1	CREBBP	41.3073	68.5489	0.7422	1.0	NC	No	No	2	CREBBP_exon_chr16:3779875	0.9762	0.7121	-0.2641	NA	1	NA	NA	NA	NA	CREBBP_exon_chr16:3779875
2	CREBBP									CREBBP_exon_chr16:3786204	0.0238	0.2353	0.2115	NA	6	NA	NA	NA	NA	CREBBP_exon_chr16:3786204
1	RAPH1	81.3035	77.8523	-0.0646	1.0	NC	No	No	1	RAPH1_exon_chr2:204307396	1.0	1.0	0.0	NA	6	0.8205	0.6691	-0.1513	NA	RAPH1_exon_chr2:204307396
1	WDR33	210.1312	176.5325	-0.2499	1.0	NC	No	No	2	WDR33_exon_chr2:128464126	0.7794	0.9283	0.149	NA	2	NA	NA	NA	NA	WDR33_exon_chr2:128464126
2	WDR33									WDR33_exon_chr2:128522553	0.1989	0.0673	-0.1316	NA	5	0.2078	0.2754	0.0676	NA	WDR33_exon_chr2:128522553
1	ZMYM2	39.6169	88.3588	1.1387	1.0	NC	No	No	1	ZMYM2_exon_chr13:20659961	1.0	1.0	0.0	NA	5	0.1155	0.1529	0.0374	NA	ZMYM2_exon_chr13:20659961
1	NAGK	424.761	444.5744	0.075	0.9113	NC	No	No	1	NAGK_exon_chr2:71305447	1.0	1.0	0.0	NA	1	NA	NA	NA	NA	NAGK_exon_chr2:71305447
1	FBXW9	1.8969	7.3155	1.9236	1.0	NC	No	No	1	FBXW9_exon_chr19:12800104	1.0	1.0	0.0	NA	1	NA	NA	NA	NA	FBXW9_exon_chr19:12800104
1	CXCR6	4.8777	0.0	-4.8278	1.0	NC	No	No	1	CXCR6_exon_chr3:45987952	1.0	1.0	0.0	NA	1	NA	NA	NA	NA	CXCR6_exon_chr3:45987952
1	FRRS1	120.4397	50.2791	-1.245	1.0	NC	No	No	1	FRRS1_exon_chr1:100174676	1.0	1.0	0.0	NA	7	0.1317	0.0155	-0.1162	NA	FRRS1_exon_chr1:100174676
1	RAB3B	1.7643	0.0	-3.3846	1.0	NC	No	No	1	RAB3B_exon_chr1:52385786	1.0	1.0	0.0	NA	1	NA	NA	NA	NA	RAB3B_exon_chr1:52385786
1	CCDC57	1.8969	7.4593	1.9554	1.0	NC	No	No	1	CCDC57_exon_chr17:80059742	1.0	1.0	0.0	NA	1	NA	NA	NA	NA	CCDC57_exon_chr17:80059742
1	PCSK7	23.9471	76.6849	1.6595	1.0	NC	No	No	1	PCSK7_exon_chr11:117077072	1.0	1.0	0.0	NA	1	NA	NA	NA	NA	PCSK7_exon_chr11:117077072
1	RCCD1	66.5883	107.0195	0.6804	1.0	NC	No	No	1	RCCD1_exon_chr15:91504847	1.0	1.0	0.0	NA	4	0.2646	0.222	-0.0426	NA	RCCD1_exon_chr15:91504847
1	NSDHL	96.8959	46.2416	-1.0774	1.0	NC	No	No	1	NSDHL_exon_chrX:152037327	1.0	1.0	0.0	NA	3	0.6247	0.8451	0.2203	NA	NSDHL_exon_chrX:152037327
1	LOC729080	391.5041	261.2873	-0.5747	0.3306	NC	No	No	1	LOC729080_exon_chr5:141276260	1.0	1.0	0.0	NA	1	NA	NA	NA	NA	LOC729080_exon_chr5:141276260
1	GOLGA2P7	3.7136	10.59	1.568	1.0	NC	No	No	1	GOLGA2P7_exon_chr15:84869960	1.0	1.0	0.0	NA	1	NA	NA	NA	NA	GOLGA2P7_exon_chr15:84869960
1	NKAIN4	9.7592	3.6011	-1.409	1.0	NC	No	No	1	NKAIN4_exon_chr20:61872858	1.0	1.0	0.0	NA	1	NA	NA	NA	NA	NKAIN4_exon_chr20:61872858
1	ANKRD33B	42.2092	64.0688	0.6249	1.0	NC	No	No	1	ANKRD33B_exon_chr5:10649377	1.0	1.0	0.0	NA	1	NA	NA	NA	NA	ANKRD33B_exon_chr5:10649377
1	CAPZB	717.2708	623.9197	-0.2035	0.746	NC	No	No	1	CAPZB_exon_chr1:19666111	1.0	1.0	0.0	NA	3	0.7254	0.6782	-0.0472	NA	CAPZB_exon_chr1:19666111
1	ARL1	273.4097	284.9502	0.0561	1.0	NC	No	No	1	ARL1_exon_chr12:101789448	1.0	1.0	0.0	NA	5	0.4462	0.2532	-0.193	NA	ARL1_exon_chr12:101789448
1	STX8	84.7929	104.5228	0.316	1.0	NC	No	No	1	STX8_exon_chr17:9153962	1.0	1.0	0.0	NA	1	NA	NA	NA	NA	STX8_exon_chr17:9153962
1	MRPS9-AS1	3.5228	0.0	-4.3611	1.0	NC	No	No	1	MRPS9-AS1_exon_chr2:105713856	1.0	1.0	0.0	NA	1	NA	NA	NA	NA	MRPS9-AS1_exon_chr2:105713856
1	TCEA2	1.8969	13.0264	2.7323	0.7848	NC	No	No	1	TCEA2_exon_chr20:62703524	1.0	1.0	0.0	NA	1	NA	NA	NA	NA	TCEA2_exon_chr20:62703524
1	CCDC34	514.1621	783.4241	0.6038	0.0931	UP	Yes	No	3	CCDC34_exon_chr11:27360582	0.2779	0.0749	-0.203	NA	3	0.8176	0.647	-0.1706	NA	CCDC34_exon_chr11:27360582
2	CCDC34									CCDC34_exon_chr11:27363097	0.3719	0.4382	0.0664	NA	3	0.6221	0.6613	0.0392	NA	CCDC34_exon_chr11:27363097
3	CCDC34									CCDC34_exon_chr11:27371986	0.3502	0.4839	0.1337	Up	1	NA	NA	NA	NA	CCDC34_exon_chr11:27371986
1	PSMD5	93.7408	65.9876	-0.5222	1.0	NC	No	No	1	PSMD5_exon_chr9:123580441	1.0	1.0	0.0	NA	3	0.0624	0.3638	0.3014	NA	PSMD5_exon_chr9:123580441
1	SNORA79	60.1996	67.9666	0.1734	1.0	NC	No	No	1	SNORA79_exon_chr14:81669178	1.0	1.0	0.0	NA	1	NA	NA	NA	NA	SNORA79_exon_chr14:81669178
1	LBX2	0.8129	6.9447	3.024	1.0	NC	No	No	1	LBX2_exon_chr2:74725445	1.0	1.0	0.0	NA	1	NA	NA	NA	NA	LBX2_exon_chr2:74725445
1	SLC39A3	20.815	23.5695	0.1959	1.0	NC	No	No	1	SLC39A3_exon_chr19:2733483	1.0	1.0	0.0	NA	1	NA	NA	NA	NA	SLC39A3_exon_chr19:2733483
1	PDHX	46.0949	29.2006	-0.649	1.0	NC	No	No	1	PDHX_exon_chr11:35016460	1.0	1.0	0.0	NA	3	NA	NA	NA	NA	PDHX_exon_chr11:35016460
1	PRPS2	19.4717	18.8025	-0.0665	1.0	NC	No	No	1	PRPS2_exon_chrX:12840822	1.0	1.0	0.0	NA	1	NA	NA	NA	NA	PRPS2_exon_chrX:12840822
1	SMARCD3	2.4012	0.7717	-1.5668	1.0	NC	No	No	1	SMARCD3_exon_chr7:150936242	1.0	1.0	0.0	NA	1	NA	NA	NA	NA	SMARCD3_exon_chr7:150936242
1	SRF	59.131	27.9099	-1.0828	1.0	NC	No	No	1	SRF_exon_chr6:43146832	1.0	1.0	0.0	NA	2	NA	NA	NA	NA	SRF_exon_chr6:43146832
1	ZNF280A	3.0015	0.0	-4.0858	1.0	NC	No	No	1	ZNF280A_exon_chr22:22870025	1.0	1.0	0.0	NA	1	NA	NA	NA	NA	ZNF280A_exon_chr22:22870025
1	LRRC17	2.6464	0.0	-3.9596	1.0	NC	No	No	1	LRRC17_exon_chr7:102584656	1.0	1.0	0.0	NA	1	NA	NA	NA	NA	LRRC17_exon_chr7:102584656
1	KMT2E	92.6263	80.3833	-0.1961	1.0	NC	No	No	4	KMT2E_exon_chr7:104730455	0.0	0.1881	0.1881	NA	1	NA	NA	NA	NA	KMT2E_exon_chr7:104730455
2	KMT2E									KMT2E_exon_chr7:104731662	0.0344	0.108	0.0736	NA	2	NA	NA	NA	NA	KMT2E_exon_chr7:104731662
3	KMT2E									KMT2E_exon_chr7:104742332	0.097	0.2195	0.1225	NA	1	NA	NA	NA	NA	KMT2E_exon_chr7:104742332
4	KMT2E									KMT2E_exon_chr7:104752271	0.8234	0.4198	-0.4036	NA	3	NA	NA	NA	NA	KMT2E_exon_chr7:104752271
1	ACAD10	35.1057	31.172	-0.1935	1.0	NC	No	No	1	ACAD10_exon_chr12:112194136	1.0	1.0	0.0	NA	1	NA	NA	NA	NA	ACAD10_exon_chr12:112194136
1	PTCH1	62.5898	66.4121	0.0673	1.0	NC	No	No	1	PTCH1_exon_chr9:98208673	1.0	1.0	0.0	NA	1	NA	NA	NA	NA	PTCH1_exon_chr9:98208673
1	PARPBP	83.8357	18.8987	-2.1636	1.0	NC	No	No	1	PARPBP_exon_chr12:102589728	1.0	1.0	0.0	NA	1	NA	NA	NA	NA	PARPBP_exon_chr12:102589728
1	GPR146	536.6016	761.6244	0.5056	0.1847	NC	No	No	1	GPR146_exon_chr7:1097127	1.0	1.0	0.0	NA	1	NA	NA	NA	NA	GPR146_exon_chr7:1097127
1	TMEM220	1.8969	0.0	-3.4764	1.0	NC	No	No	1	TMEM220_exon_chr17:10618905	1.0	1.0	0.0	NA	1	NA	NA	NA	NA	TMEM220_exon_chr17:10618905
1	PAICS	2250.5908	1522.5022	-0.5649	0.061	NC	No	No	1	PAICS_exon_chr4:57325537	1.0	1.0	0.0	NA	8	0.3861	0.4182	0.0321	NA	PAICS_exon_chr4:57325537
1	CATSPER2P1	7.5428	13.6325	0.8421	1.0	NC	No	No	1	CATSPER2P1_exon_chr15:44029206	1.0	1.0	0.0	NA	1	NA	NA	NA	NA	CATSPER2P1_exon_chr15:44029206
1	ARFRP1	39.7444	46.8129	0.2249	1.0	NC	No	No	1	ARFRP1_exon_chr20:62332054	1.0	1.0	0.0	NA	2	0.8653	0.5103	-0.3551	NA	ARFRP1_exon_chr20:62332054
1	ODF2L	107.7363	83.561	-0.3668	1.0	NC	No	No	1	ODF2L_exon_chr1:86817891	1.0	1.0	0.0	NA	8	0.7605	0.897	0.1365	NA	ODF2L_exon_chr1:86817891
1	ALPG	28.8326	67.2982	1.2153	1.0	NC	No	No	1	ALPG_exon_chr2:233274283	1.0	1.0	0.0	NA	1	NA	NA	NA	NA	ALPG_exon_chr2:233274283
1	C11orf24	36.2592	41.2278	0.1695	1.0	NC	No	No	1	C11orf24_exon_chr11:68030386	1.0	1.0	0.0	NA	2	0.4988	0.2746	-0.2241	NA	C11orf24_exon_chr11:68030386
1	ZNF256	25.534	14.891	-0.7881	1.0	NC	No	No	1	ZNF256_exon_chr19:58454015	1.0	1.0	0.0	NA	1	NA	NA	NA	NA	ZNF256_exon_chr19:58454015
1	TRAPPC10	35.0048	82.6583	1.2575	1.0	NC	No	No	1	TRAPPC10_exon_chr21:45523173	1.0	1.0	0.0	NA	4	NA	NA	NA	NA	TRAPPC10_exon_chr21:45523173
1	EIF4A3	312.5385	250.0487	-0.3158	1.0	NC	No	No	1	EIF4A3_exon_chr17:78109305	1.0	1.0	0.0	NA	1	NA	NA	NA	NA	EIF4A3_exon_chr17:78109305
1	PRKD2	36.8308	25.5066	-0.5473	1.0	NC	No	No	1	PRKD2_exon_chr19:47177992	1.0	1.0	0.0	NA	1	NA	NA	NA	NA	PRKD2_exon_chr19:47177992
1	ABCA13	8.2461	0.3215	-4.6194	1.0	NC	No	No	1	ABCA13_exon_chr7:48685012	1.0	1.0	0.0	NA	1	NA	NA	NA	NA	ABCA13_exon_chr7:48685012
1	ZNF45	11.0598	5.2002	-1.1034	1.0	NC	No	No	1	ZNF45_exon_chr19:44419352	1.0	1.0	0.0	NA	2	NA	NA	NA	NA	ZNF45_exon_chr19:44419352
1	MBD2	150.9307	109.0844	-0.4616	0.9279	NC	No	No	2	MBD2_exon_chr18:51681681	0.503	0.4836	-0.0194	NA	3	0.7343	0.9785	0.2442	NA	MBD2_exon_chr18:51681681
2	MBD2									MBD2_exon_chr18:51729472	0.4692	0.5046	0.0354	NA	1	NA	NA	NA	NA	MBD2_exon_chr18:51729472
1	RHBDD3	40.1002	35.6874	-0.1637	1.0	NC	No	No	1	RHBDD3_exon_chr22:29656226	1.0	1.0	0.0	NA	1	NA	NA	NA	NA	RHBDD3_exon_chr22:29656226
1	TMEM101	79.9904	37.0766	-1.1141	1.0	NC	No	No	1	TMEM101_exon_chr17:42089604	1.0	1.0	0.0	NA	2	0.9018	0.978	0.0762	NA	TMEM101_exon_chr17:42089604
1	ACYP1	36.3528	77.8011	1.0965	1.0	NC	No	No	1	ACYP1_exon_chr14:75520362	1.0	1.0	0.0	NA	1	NA	NA	NA	NA	ACYP1_exon_chr14:75520362
1	CYB5B	185.9035	189.6528	0.0168	1.0	NC	No	No	1	CYB5B_exon_chr16:69496332	1.0	1.0	0.0	NA	6	0.702	0.6113	-0.0906	NA	CYB5B_exon_chr16:69496332
1	SH3RF1	25.7549	1.369	-4.2498	0.4696	NC	No	No	1	SH3RF1_exon_chr4:170017838	1.0	1.0	0.0	NA	1	NA	NA	NA	NA	SH3RF1_exon_chr4:170017838
1	ERVH48-1	0.0	13.5698	6.2182	0.3403	NC	No	No	1	ERVH48-1_exon_chr21:44339401	1.0	1.0	0.0	NA	1	NA	NA	NA	NA	ERVH48-1_exon_chr21:44339401
1	CLIC3	622.8844	696.269	0.1674	0.7866	NC	No	No	1	CLIC3_exon_chr9:139889291	1.0	1.0	0.0	NA	1	NA	NA	NA	NA	CLIC3_exon_chr9:139889291
1	SZT2	10.0104	12.9247	0.3595	1.0	NC	No	No	1	SZT2_exon_chr1:43916007	1.0	1.0	0.0	NA	2	NA	NA	NA	NA	SZT2_exon_chr1:43916007
1	USP14	174.9703	127.6107	-0.4583	0.8082	NC	No	No	1	USP14_exon_chr18:211132	1.0	1.0	0.0	NA	7	0.3539	0.4293	0.0754	NA	USP14_exon_chr18:211132
1	VAMP8	478.0522	483.594	0.0218	0.9487	NC	No	No	1	VAMP8_exon_chr2:85808698	1.0	1.0	0.0	NA	1	NA	NA	NA	NA	VAMP8_exon_chr2:85808698
1	ELOB	560.4526	596.3473	0.0966	0.8748	NC	No	No	1	ELOB_exon_chr16:2822103	1.0	1.0	0.0	NA	3	0.0764	0.1528	0.0764	NA	ELOB_exon_chr16:2822103
1	ANXA4	15.2557	3.2151	-2.2566	0.8395	NC	No	No	2	ANXA4_exon_chr2:69870939	0.0	1.0	1.0	NA	1	NA	NA	NA	NA	ANXA4_exon_chr2:69870939
2	ANXA4									ANXA4_exon_chr2:70052587	1.0	0.0	-1.0	NA	2	NA	NA	NA	NA	ANXA4_exon_chr2:70052587
1	LRRFIP2	46.8624	91.3857	0.9645	1.0	NC	No	No	4	LRRFIP2_exon_chr3:37095452	0.6182	0.5742	-0.044	NA	1	NA	NA	NA	NA	LRRFIP2_exon_chr3:37095452
2	LRRFIP2									LRRFIP2_exon_chr3:37125297	0.1234	0.347	0.2236	NA	2	NA	NA	NA	NA	LRRFIP2_exon_chr3:37125297
3	LRRFIP2									LRRFIP2_exon_chr3:37190529	0.0986	0.0535	-0.045	NA	1	NA	NA	NA	NA	LRRFIP2_exon_chr3:37190529
4	LRRFIP2									LRRFIP2_exon_chr3:37214517	0.1599	0.0254	-0.1345	NA	4	NA	NA	NA	NA	LRRFIP2_exon_chr3:37214517
1	GBA2	76.5713	169.1404	1.164	0.7998	NC	No	No	1	GBA2_exon_chr9:35737601	1.0	1.0	0.0	NA	1	NA	NA	NA	NA	GBA2_exon_chr9:35737601
1	PRR15	0.542	17.6186	4.8201	0.4109	NC	No	No	1	PRR15_exon_chr7:29605800	1.0	1.0	0.0	NA	1	NA	NA	NA	NA	PRR15_exon_chr7:29605800
1	ROCK1P1	6.9129	9.1803	0.3978	1.0	NC	No	No	1	ROCK1P1_exon_chr18:120700	1.0	1.0	0.0	NA	3	NA	NA	NA	NA	ROCK1P1_exon_chr18:120700
1	SNORA3A	0.0	1.5433	3.0995	1.0	NC	No	No	1	SNORA3A_exon_chr11:8705773	1.0	1.0	0.0	NA	1	NA	NA	NA	NA	SNORA3A_exon_chr11:8705773
1	H3P6	1953.7968	1697.0308	-0.2033	0.5044	NC	No	Yes	1	H3P6_exon_chr2:175584527	1.0	1.0	0.0	NA	4	0.5264	0.6099	0.0835	Both	H3P6_exon_chr2:175584527
1	ZNF468	113.0655	151.6532	0.427	1.0	NC	No	No	1	ZNF468_exon_chr19:53345404	1.0	1.0	0.0	NA	2	0.8726	0.8151	-0.0576	NA	ZNF468_exon_chr19:53345404
1	RNPEP	593.1291	478.181	-0.317	0.577	NC	No	No	1	RNPEP_exon_chr1:201974685	1.0	1.0	0.0	NA	1	NA	NA	NA	NA	RNPEP_exon_chr1:201974685
1	HDAC10	10.2052	13.1537	0.3967	1.0	NC	No	No	1	HDAC10_exon_chr22:50683959	1.0	1.0	0.0	NA	1	NA	NA	NA	NA	HDAC10_exon_chr22:50683959
1	KATNA1	56.2564	27.8706	-1.0138	1.0	NC	No	No	2	KATNA1_exon_chr6:149916370	0.8191	0.8136	-0.0055	NA	2	0.879	0.7435	-0.1355	NA	KATNA1_exon_chr6:149916370
2	KATNA1									KATNA1_exon_chr6:149944419	0.1809	0.1864	0.0055	NA	1	NA	NA	NA	NA	KATNA1_exon_chr6:149944419
1	SHLD2P3	3.0262	6.4	1.069	1.0	NC	No	No	1	SHLD2P3_exon_chr10:47420256	1.0	1.0	0.0	NA	2	NA	NA	NA	NA	SHLD2P3_exon_chr10:47420256
1	TKFC	20.4232	47.3193	1.2468	1.0	NC	No	No	1	TKFC_exon_chr11:61113766	1.0	1.0	0.0	NA	1	NA	NA	NA	NA	TKFC_exon_chr11:61113766
1	COG2	66.139	94.5823	0.5262	1.0	NC	No	No	1	COG2_exon_chr1:230829037	1.0	1.0	0.0	NA	2	0.4462	0.7355	0.2893	NA	COG2_exon_chr1:230829037
1	ANKRD46	38.6496	36.579	-0.0924	1.0	NC	No	No	1	ANKRD46_exon_chr8:101534999	1.0	1.0	0.0	NA	3	0.9096	0.9906	0.081	NA	ANKRD46_exon_chr8:101534999
1	MARS1	355.5729	457.3133	0.3686	0.4806	NC	No	No	1	MARS1_exon_chr12:57910217	1.0	1.0	0.0	NA	1	NA	NA	NA	NA	MARS1_exon_chr12:57910217
1	QDPR	46.8358	83.5658	0.8669	1.0	NC	No	No	1	QDPR_exon_chr4:17488859	1.0	1.0	0.0	NA	4	0.7447	0.7119	-0.0328	NA	QDPR_exon_chr4:17488859
1	LYAR	88.6113	107.2061	0.2799	1.0	NC	No	No	2	LYAR_exon_chr4:4269750	0.5341	0.5508	0.0167	NA	1	NA	NA	NA	NA	LYAR_exon_chr4:4269750
2	LYAR									LYAR_exon_chr4:4275396	0.4659	0.4492	-0.0167	NA	1	NA	NA	NA	NA	LYAR_exon_chr4:4275396
1	MMAA	2.9808	3.6011	0.2665	1.0	NC	No	No	1	MMAA_exon_chr4:146576298	1.0	1.0	0.0	NA	1	NA	NA	NA	NA	MMAA_exon_chr4:146576298
1	ATXN3	172.8777	262.591	0.5999	0.6793	NC	No	No	1	ATXN3_exon_chr14:92530758	1.0	1.0	0.0	NA	5	0.116	0.0607	-0.0552	NA	ATXN3_exon_chr14:92530758
1	PHAX	138.7485	170.1368	0.2824	1.0	NC	No	No	1	PHAX_exon_chr5:125960266	1.0	1.0	0.0	NA	5	0.3159	0.2392	-0.0767	NA	PHAX_exon_chr5:125960266
1	SAMD8	117.4079	68.0826	-0.784	1.0	NC	No	No	1	SAMD8_exon_chr10:76935823	1.0	1.0	0.0	NA	5	0.4208	0.5918	0.171	NA	SAMD8_exon_chr10:76935823
1	GOLGA3	88.7717	70.5085	-0.3481	1.0	NC	No	No	2	GOLGA3_exon_chr12:133349880	0.9155	0.9343	0.0188	NA	1	NA	NA	NA	NA	GOLGA3_exon_chr12:133349880
2	GOLGA3									GOLGA3_exon_chr12:133367879	0.0845	0.0657	-0.0188	NA	4	0.6705	0.9743	0.3038	NA	GOLGA3_exon_chr12:133367879
1	DMXL2	88.4814	84.2711	-0.0624	1.0	NC	No	No	2	DMXL2_exon_chr15:51741390	0.9723	0.8384	-0.1339	NA	2	NA	NA	NA	NA	DMXL2_exon_chr15:51741390
2	DMXL2									DMXL2_exon_chr15:51773820	0.0277	0.1616	0.1339	NA	1	NA	NA	NA	NA	DMXL2_exon_chr15:51773820
1	ZNF37BP	6.8408	35.2032	2.3448	1.0	NC	No	No	1	ZNF37BP_exon_chr10:43016575	1.0	1.0	0.0	NA	4	NA	NA	NA	NA	ZNF37BP_exon_chr10:43016575
1	CMAS	162.1974	178.1609	0.1311	1.0	NC	No	No	1	CMAS_exon_chr12:22218054	1.0	1.0	0.0	NA	1	NA	NA	NA	NA	CMAS_exon_chr12:22218054
1	AP1G2	212.9216	177.7683	-0.2708	0.9951	NC	No	No	1	AP1G2_exon_chr14:24029059	1.0	1.0	0.0	NA	1	NA	NA	NA	NA	AP1G2_exon_chr14:24029059
1	JMJD8	96.5827	137.4494	0.5188	1.0	NC	No	No	1	JMJD8_exon_chr16:732874	1.0	1.0	0.0	NA	1	NA	NA	NA	NA	JMJD8_exon_chr16:732874
1	TM2D3	112.1466	118.1337	0.0784	1.0	NC	No	No	1	TM2D3_exon_chr15:102182847	1.0	1.0	0.0	NA	2	1.0	0.8229	-0.1771	NA	TM2D3_exon_chr15:102182847
1	C4orf3	396.4243	326.6578	-0.2792	0.6542	NC	No	No	1	C4orf3_exon_chr4:120219934	1.0	1.0	0.0	NA	4	0.083	0.1302	0.0472	NA	C4orf3_exon_chr4:120219934
1	METTL2A	235.4734	142.2961	-0.7169	0.6915	NC	No	No	1	METTL2A_exon_chr17:60525935	1.0	1.0	0.0	NA	1	NA	NA	NA	NA	METTL2A_exon_chr17:60525935
1	MTRES1	73.7186	36.7558	-0.9938	1.0	NC	No	No	1	MTRES1_exon_chr6:107372260	1.0	1.0	0.0	NA	3	0.0624	0.0	-0.0624	NA	MTRES1_exon_chr6:107372260
1	BCDIN3D	5.828	1.8005	-1.6591	1.0	NC	No	No	1	BCDIN3D_exon_chr12:50232798	1.0	1.0	0.0	NA	1	NA	NA	NA	NA	BCDIN3D_exon_chr12:50232798
1	SUZ12	242.9179	281.244	0.2227	1.0	NC	No	No	1	SUZ12_exon_chr17:30325676	1.0	1.0	0.0	NA	4	0.9106	0.9279	0.0173	NA	SUZ12_exon_chr17:30325676
1	CDC5L	140.0242	125.2703	-0.1604	1.0	NC	No	No	2	CDC5L_exon_chr6:44371545	0.0976	0.4461	0.3485	NA	2	NA	NA	NA	NA	CDC5L_exon_chr6:44371545
2	CDC5L									CDC5L_exon_chr6:44414343	0.8966	0.4806	-0.416	NA	3	0.1521	0.0	-0.1521	NA	CDC5L_exon_chr6:44414343
1	SFI1	11.6695	35.3292	1.5703	1.0	NC	No	No	1	SFI1_exon_chr22:32014299	1.0	1.0	0.0	NA	1	NA	NA	NA	NA	SFI1_exon_chr22:32014299
1	FAM199X	126.9626	100.1001	-0.3282	1.0	NC	No	No	1	FAM199X_exon_chrX:103434288	1.0	1.0	0.0	NA	3	0.3057	0.2085	-0.0973	NA	FAM199X_exon_chrX:103434288
1	KIF12	15.1125	15.5514	0.057	1.0	NC	No	No	1	KIF12_exon_chr9:116854280	1.0	1.0	0.0	NA	1	NA	NA	NA	NA	KIF12_exon_chr9:116854280
1	NR2C2	42.893	17.6212	-1.285	1.0	NC	No	No	1	NR2C2_exon_chr3:15084340	1.0	1.0	0.0	NA	1	NA	NA	NA	NA	NR2C2_exon_chr3:15084340
1	AUNIP	40.9316	59.1649	0.5486	1.0	NC	No	No	2	AUNIP_exon_chr1:26158649	0.2194	0.1843	-0.0351	NA	1	NA	NA	NA	NA	AUNIP_exon_chr1:26158649
2	AUNIP									AUNIP_exon_chr1:26162337	0.7806	0.8157	0.0351	NA	2	NA	NA	NA	NA	AUNIP_exon_chr1:26162337
1	TRPM6	0.0	11.2529	5.9513	1.0	NC	No	No	1	TRPM6_exon_chr9:77339662	1.0	1.0	0.0	NA	1	NA	NA	NA	NA	TRPM6_exon_chr9:77339662
1	ZNF91	1.8969	36.2054	4.1771	0.5992	NC	No	No	1	ZNF91_exon_chr19:23545527	1.0	1.0	0.0	NA	3	NA	NA	NA	NA	ZNF91_exon_chr19:23545527
1	NDST2	36.2156	30.2522	-0.2747	1.0	NC	No	No	2	NDST2_exon_chr10:75562334	0.7826	0.6604	-0.1221	NA	1	NA	NA	NA	NA	NDST2_exon_chr10:75562334
2	NDST2									NDST2_exon_chr10:75570661	0.2174	0.3396	0.1221	NA	1	NA	NA	NA	NA	NDST2_exon_chr10:75570661
1	EME1	14.3074	9.9317	-0.5052	1.0	NC	No	No	1	EME1_exon_chr17:48458123	1.0	1.0	0.0	NA	1	NA	NA	NA	NA	EME1_exon_chr17:48458123
1	EIF2B5	102.8386	66.511	-0.6171	1.0	NC	No	No	1	EIF2B5_exon_chr3:183862671	1.0	1.0	0.0	NA	1	NA	NA	NA	NA	EIF2B5_exon_chr3:183862671
1	GNA13	140.1245	173.6862	0.3214	0.9557	NC	No	No	1	GNA13_exon_chr17:63010947	1.0	1.0	0.0	NA	5	0.1914	0.1295	-0.0619	NA	GNA13_exon_chr17:63010947
1	RPL39	2088.8559	1896.1312	-0.1387	0.672	NC	No	No	1	RPL39_exon_chrX:118920695	1.0	1.0	0.0	NA	1	NA	NA	NA	NA	RPL39_exon_chrX:118920695
1	LYRM1	3.4593	12.9739	1.8603	0.9388	NC	No	No	1	LYRM1_exon_chr16:20935321	1.0	1.0	0.0	NA	1	NA	NA	NA	NA	LYRM1_exon_chr16:20935321
1	ETFRF1	20.6872	6.4795	-1.6576	0.819	NC	No	No	1	ETFRF1_exon_chr12:25357024	1.0	1.0	0.0	NA	2	NA	NA	NA	NA	ETFRF1_exon_chr12:25357024
1	MS4A15	0.271	4.8178	3.7213	1.0	NC	No	No	1	MS4A15_exon_chr11:60543077	1.0	1.0	0.0	NA	1	NA	NA	NA	NA	MS4A15_exon_chr11:60543077
1	CALU	534.5923	437.7073	-0.2868	0.5996	NC	No	No	1	CALU_exon_chr7:128409116	1.0	1.0	0.0	NA	9	0.747	0.6594	-0.0876	NA	CALU_exon_chr7:128409116
1	LURAP1L	14.4168	6.7516	-1.1056	1.0	NC	No	No	1	LURAP1L_exon_chr9:12821384	1.0	1.0	0.0	NA	1	NA	NA	NA	NA	LURAP1L_exon_chr9:12821384
1	SUCO	137.755	50.6824	-1.444	0.8643	NC	No	No	1	SUCO_exon_chr1:172578955	1.0	1.0	0.0	NA	3	NA	NA	NA	NA	SUCO_exon_chr1:172578955
1	SLMAP	34.1626	10.4495	-1.7244	0.8382	NC	No	No	3	SLMAP_exon_chr3:57898107	0.0796	0.0	-0.0796	NA	4	NA	NA	NA	NA	SLMAP_exon_chr3:57898107
2	SLMAP									SLMAP_exon_chr3:57902632	0.0	0.4258	0.4258	NA	1	NA	NA	NA	NA	SLMAP_exon_chr3:57902632
3	SLMAP									SLMAP_exon_chr3:57913022	0.9204	0.5742	-0.3463	NA	1	NA	NA	NA	NA	SLMAP_exon_chr3:57913022
1	EMC1	106.3724	68.207	-0.6497	1.0	NC	No	No	1	EMC1_exon_chr1:19545976	1.0	1.0	0.0	NA	5	0.6174	0.4907	-0.1267	NA	EMC1_exon_chr1:19545976
1	KSR2	11.4059	4.8226	-1.2275	1.0	NC	No	No	1	KSR2_exon_chr12:117905010	1.0	1.0	0.0	NA	1	NA	NA	NA	NA	KSR2_exon_chr12:117905010
1	YBEY	130.6571	130.3048	0.0007	1.0	NC	No	No	1	YBEY_exon_chr21:47717452	1.0	1.0	0.0	NA	1	NA	NA	NA	NA	YBEY_exon_chr21:47717452
1	ZNF263	55.5228	26.106	-1.0835	1.0	NC	No	No	1	ZNF263_exon_chr16:3339392	1.0	1.0	0.0	NA	1	NA	NA	NA	NA	ZNF263_exon_chr16:3339392
1	FOXD1	21.5257	0.0	-6.9559	0.1493	NC	No	No	1	FOXD1_exon_chr5:72744602	1.0	1.0	0.0	NA	1	NA	NA	NA	NA	FOXD1_exon_chr5:72744602
1	ITPKA	1.525	7.8587	2.3102	1.0	NC	No	No	1	ITPKA_exon_chr15:41795160	1.0	1.0	0.0	NA	1	NA	NA	NA	NA	ITPKA_exon_chr15:41795160
1	MYL6B	110.6015	109.098	-0.0106	1.0	NC	No	No	1	MYL6B_exon_chr12:56551665	1.0	1.0	0.0	NA	1	NA	NA	NA	NA	MYL6B_exon_chr12:56551665
1	PROM2	47.1742	11.1569	-2.0802	0.7866	NC	No	No	1	PROM2_exon_chr2:95954971	1.0	1.0	0.0	NA	4	NA	NA	NA	NA	PROM2_exon_chr2:95954971
1	IPO8	79.9613	63.0355	-0.3495	1.0	NC	No	No	1	IPO8_exon_chr12:30783891	1.0	1.0	0.0	NA	1	NA	NA	NA	NA	IPO8_exon_chr12:30783891
1	MIR4709	1264.5478	1330.546	0.0762	0.8761	NC	No	No	1	MIR4709_exon_chr14:74947482	1.0	1.0	0.0	NA	4	0.961	0.9394	-0.0217	NA	MIR4709_exon_chr14:74947482
1	ZNF257	36.5226	22.8478	-0.6768	1.0	NC	No	No	1	ZNF257_exon_chr19:22270778	1.0	1.0	0.0	NA	3	NA	NA	NA	NA	ZNF257_exon_chr19:22270778
1	SEM1	1010.301	1129.6735	0.1616	0.7767	NC	No	No	1	SEM1_exon_chr7:96318278	1.0	1.0	0.0	NA	1	NA	NA	NA	NA	SEM1_exon_chr7:96318278
1	NR1D2	21.4565	27.7787	0.3607	1.0	NC	No	No	1	NR1D2_exon_chr3:24018713	1.0	1.0	0.0	NA	3	NA	NA	NA	NA	NR1D2_exon_chr3:24018713
1	SMAD7	27.4468	33.4243	0.3129	1.0	NC	No	No	1	SMAD7_exon_chr18:46448280	1.0	1.0	0.0	NA	2	NA	NA	NA	NA	SMAD7_exon_chr18:46448280
1	ZNF830	118.0088	74.5107	-0.6717	1.0	NC	No	No	1	ZNF830_exon_chr17:33288558	1.0	1.0	0.0	NA	4	0.3694	0.1735	-0.1959	NA	ZNF830_exon_chr17:33288558
1	NFIL3	74.4325	72.3846	-0.0492	1.0	NC	No	No	1	NFIL3_exon_chr9:94173188	1.0	1.0	0.0	NA	2	0.832	1.0	0.168	NA	NFIL3_exon_chr9:94173188
1	KCNH5	3.9696	5.6588	0.4978	1.0	NC	No	No	1	KCNH5_exon_chr14:63175173	1.0	1.0	0.0	NA	2	NA	NA	NA	NA	KCNH5_exon_chr14:63175173
1	ZNF875	18.8479	52.7714	1.5135	0.7516	NC	No	No	2	ZNF875_exon_chr19:37820073	0.4273	0.2002	-0.2271	NA	1	NA	NA	NA	NA	ZNF875_exon_chr19:37820073
2	ZNF875									ZNF875_exon_chr19:37853007	0.5727	0.7998	0.2271	NA	1	NA	NA	NA	NA	ZNF875_exon_chr19:37853007
1	FSTL3	78.8884	104.0631	0.4098	1.0	NC	No	No	1	FSTL3_exon_chr19:681649	1.0	1.0	0.0	NA	1	NA	NA	NA	NA	FSTL3_exon_chr19:681649
1	THAP12	218.4182	246.4489	0.1822	1.0	NC	No	No	3	THAP12_exon_chr11:76063838	0.8026	0.5776	-0.225	NA	1	NA	NA	NA	NA	THAP12_exon_chr11:76063838
2	THAP12									THAP12_exon_chr11:76066698	0.1553	0.2527	0.0973	NA	1	NA	NA	NA	NA	THAP12_exon_chr11:76066698
3	THAP12									THAP12_exon_chr11:76072107	0.0421	0.1698	0.1277	NA	1	NA	NA	NA	NA	THAP12_exon_chr11:76072107
1	ZDHHC17	46.1516	34.6092	-0.4017	1.0	NC	No	No	1	ZDHHC17_exon_chr12:77244626	1.0	1.0	0.0	NA	3	NA	NA	NA	NA	ZDHHC17_exon_chr12:77244626
1	TBCK	82.6118	25.3981	-1.6985	1.0	NC	No	No	1	TBCK_exon_chr4:106967837	1.0	1.0	0.0	NA	1	NA	NA	NA	NA	TBCK_exon_chr4:106967837
1	PUS7L	46.9875	42.151	-0.165	1.0	NC	No	No	1	PUS7L_exon_chr12:44124505	1.0	1.0	0.0	NA	10	0.3131	0.7372	0.4241	NA	PUS7L_exon_chr12:44124505
1	XPNPEP3	89.3605	63.9438	-0.4896	1.0	NC	No	No	2	XPNPEP3_exon_chr22:41257621	0.2631	0.4188	0.1558	NA	4	0.8042	0.8402	0.036	NA	XPNPEP3_exon_chr22:41257621
2	XPNPEP3									XPNPEP3_exon_chr22:41322272	0.7369	0.5812	-0.1558	NA	1	NA	NA	NA	NA	XPNPEP3_exon_chr22:41322272
1	MIR7111	7828.3872	7526.5374	-0.0571	0.8887	NC	No	No	1	MIR7111_exon_chr6:35438284	1.0	1.0	0.0	NA	1	NA	NA	NA	NA	MIR7111_exon_chr6:35438284
1	ANAPC13	151.3271	106.77	-0.5159	0.8365	NC	No	No	1	ANAPC13_exon_chr3:134197557	1.0	1.0	0.0	NA	1	NA	NA	NA	NA	ANAPC13_exon_chr3:134197557
1	USP40	10.2684	7.8181	-0.403	1.0	NC	No	No	1	USP40_exon_chr2:234386149	1.0	1.0	0.0	NA	1	NA	NA	NA	NA	USP40_exon_chr2:234386149
1	EPC2	23.0456	10.3632	-1.1623	1.0	NC	No	No	1	EPC2_exon_chr2:149543873	1.0	1.0	0.0	NA	2	NA	NA	NA	NA	EPC2_exon_chr2:149543873
1	CFL2	528.8651	442.1146	-0.262	0.7337	NC	No	No	1	CFL2_exon_chr14:35182183	1.0	1.0	0.0	NA	5	0.4836	0.4601	-0.0235	NA	CFL2_exon_chr14:35182183
1	GUSBP15	5.7855	5.5099	-0.0484	1.0	NC	No	No	1	GUSBP15_exon_chr5:69777365	1.0	1.0	0.0	NA	1	NA	NA	NA	NA	GUSBP15_exon_chr5:69777365
1	ZNF324	1.1027	0.2572	-1.7612	1.0	NC	No	No	1	ZNF324_exon_chr19:58982097	1.0	1.0	0.0	NA	1	NA	NA	NA	NA	ZNF324_exon_chr19:58982097
1	DHRS13	37.0152	13.6002	-1.4402	1.0	NC	No	No	1	DHRS13_exon_chr17:27225910	1.0	1.0	0.0	NA	1	NA	NA	NA	NA	DHRS13_exon_chr17:27225910
1	SNN	12.385	15.832	0.3484	1.0	NC	No	No	1	SNN_exon_chr16:11769830	1.0	1.0	0.0	NA	1	NA	NA	NA	NA	SNN_exon_chr16:11769830
1	IK	529.4183	805.3141	0.606	0.5734	NC	No	No	3	IK_exon_chr5:140034100	0.0945	0.1153	0.0208	NA	1	NA	NA	NA	NA	IK_exon_chr5:140034100
2	IK									IK_exon_chr5:140038523	0.4685	0.5223	0.0538	NA	2	0.5239	0.2433	-0.2806	NA	IK_exon_chr5:140038523
3	IK									IK_exon_chr5:140041886	0.4115	0.3518	-0.0597	NA	1	NA	NA	NA	NA	IK_exon_chr5:140041886
1	HCN2	0.0	2.0577	3.5108	1.0	NC	No	No	1	HCN2_exon_chr19:615794	1.0	1.0	0.0	NA	1	NA	NA	NA	NA	HCN2_exon_chr19:615794
1	RPLP0	13987.9136	15346.6517	0.1333	0.667	NC	No	No	1	RPLP0_exon_chr12:120634737	1.0	1.0	0.0	NA	1	NA	NA	NA	NA	RPLP0_exon_chr12:120634737
1	WBP1L	46.7899	50.239	0.099	1.0	NC	No	No	1	WBP1L_exon_chr10:104572351	1.0	1.0	0.0	NA	1	NA	NA	NA	NA	WBP1L_exon_chr10:104572351
1	DUSP22	8.8859	12.8357	0.5422	1.0	NC	No	No	1	DUSP22_exon_chr6:348768	1.0	1.0	0.0	NA	3	NA	NA	NA	NA	DUSP22_exon_chr6:348768
1	PPP1R35	98.7322	92.4596	-0.1097	1.0	NC	No	No	1	PPP1R35_exon_chr7:100033156	1.0	1.0	0.0	NA	1	NA	NA	NA	NA	PPP1R35_exon_chr7:100033156
1	HIVEP2	10.5856	12.2026	0.196	1.0	NC	No	No	1	HIVEP2_exon_chr6:143075068	1.0	1.0	0.0	NA	1	NA	NA	NA	NA	HIVEP2_exon_chr6:143075068
1	FERMT1	9.7394	36.8565	1.9014	1.0	NC	No	No	1	FERMT1_exon_chr20:6057993	1.0	1.0	0.0	NA	1	NA	NA	NA	NA	FERMT1_exon_chr20:6057993
1	BEX2	258.2751	258.8132	0.0081	1.0	NC	No	No	1	BEX2_exon_chrX:102564909	1.0	1.0	0.0	NA	3	0.9219	0.7575	-0.1645	NA	BEX2_exon_chrX:102564909
1	FAM49A	49.3919	20.89	-1.2229	1.0	NC	No	No	1	FAM49A_exon_chr2:16734267	1.0	1.0	0.0	NA	6	NA	NA	NA	NA	FAM49A_exon_chr2:16734267
1	S100A14	41.5378	60.0072	0.5392	1.0	NC	No	No	1	S100A14_exon_chr1:153587498	1.0	1.0	0.0	NA	1	NA	NA	NA	NA	S100A14_exon_chr1:153587498
1	RPE	311.1872	203.1103	-0.6162	0.8665	NC	No	No	1	RPE_exon_chr2:210884392	1.0	1.0	0.0	NA	14	0.4013	0.5845	0.1832	NA	RPE_exon_chr2:210884392
1	CHCHD4	113.2318	227.598	0.9864	0.4174	NC	No	No	1	CHCHD4_exon_chr3:14154694	1.0	1.0	0.0	NA	1	NA	NA	NA	NA	CHCHD4_exon_chr3:14154694
1	TYK2	54.2024	39.8542	-0.4375	1.0	NC	No	No	1	TYK2_exon_chr19:10461644	1.0	1.0	0.0	NA	1	NA	NA	NA	NA	TYK2_exon_chr19:10461644
1	FUT11	132.0414	132.5341	-0.0056	1.0	NC	No	No	2	FUT11_exon_chr10:75530712	0.888	0.9508	0.0629	NA	1	NA	NA	NA	NA	FUT11_exon_chr10:75530712
2	FUT11									FUT11_exon_chr10:75535176	0.112	0.0492	-0.0629	NA	2	NA	NA	NA	NA	FUT11_exon_chr10:75535176
1	NAPA	387.1195	369.5501	-0.0585	0.9221	NC	No	No	1	NAPA_exon_chr19:47991646	1.0	1.0	0.0	NA	1	NA	NA	NA	NA	NAPA_exon_chr19:47991646
1	PAAF1	14.5578	33.5842	1.2077	1.0	NC	No	No	1	PAAF1_exon_chr11:73638329	1.0	1.0	0.0	NA	2	NA	NA	NA	NA	PAAF1_exon_chr11:73638329
1	SLC6A9	52.105	57.129	0.1425	1.0	NC	No	No	1	SLC6A9_exon_chr1:44463411	1.0	1.0	0.0	NA	1	NA	NA	NA	NA	SLC6A9_exon_chr1:44463411
1	NDUFS3	432.5568	298.6474	-0.5331	0.3783	NC	No	No	1	NDUFS3_exon_chr11:47605865	1.0	1.0	0.0	NA	1	NA	NA	NA	NA	NDUFS3_exon_chr11:47605865
1	SCML1	0.8129	5.7871	2.7668	1.0	NC	No	No	1	SCML1_exon_chrX:17771377	1.0	1.0	0.0	NA	1	NA	NA	NA	NA	SCML1_exon_chrX:17771377
1	PABPC1L	4.2853	13.9695	1.6786	0.9388	NC	No	No	1	PABPC1L_exon_chr20:43567766	1.0	1.0	0.0	NA	1	NA	NA	NA	NA	PABPC1L_exon_chr20:43567766
1	CHAF1A	40.9573	34.5063	-0.2308	1.0	NC	No	No	1	CHAF1A_exon_chr19:4442921	1.0	1.0	0.0	NA	2	NA	NA	NA	NA	CHAF1A_exon_chr19:4442921
1	NT5M	1.9848	0.0	-3.5513	1.0	NC	No	No	1	NT5M_exon_chr17:17250118	1.0	1.0	0.0	NA	1	NA	NA	NA	NA	NT5M_exon_chr17:17250118
1	UBQLN1	433.3335	395.2249	-0.1409	0.8365	NC	No	No	1	UBQLN1_exon_chr9:86276854	1.0	1.0	0.0	NA	5	0.7219	0.5969	-0.1249	NA	UBQLN1_exon_chr9:86276854
1	ZNF320	18.7016	40.0349	1.1064	1.0	NC	No	No	1	ZNF320_exon_chr19:53385236	1.0	1.0	0.0	NA	2	NA	NA	NA	NA	ZNF320_exon_chr19:53385236
1	ZNF354A	62.0989	96.0794	0.615	1.0	NC	No	No	1	ZNF354A_exon_chr5:178140622	1.0	1.0	0.0	NA	5	0.7873	0.6888	-0.0985	NA	ZNF354A_exon_chr5:178140622
1	SRSF8	63.387	82.9809	0.3666	1.0	NC	No	No	1	SRSF8_exon_chr11:94800040	1.0	1.0	0.0	NA	4	0.1182	0.1227	0.0045	NA	SRSF8_exon_chr11:94800040
1	ACTR5	95.5856	37.0978	-1.3675	0.8365	NC	No	No	1	ACTR5_exon_chr20:37400201	1.0	1.0	0.0	NA	1	NA	NA	NA	NA	ACTR5_exon_chr20:37400201
1	DLAT	295.8315	211.3264	-0.4922	0.672	NC	No	No	1	DLAT_exon_chr11:111933129	1.0	1.0	0.0	NA	8	0.415	0.519	0.104	NA	DLAT_exon_chr11:111933129
1	KRBA1	7.804	0.0	-5.484	1.0	NC	No	No	1	KRBA1_exon_chr7:149430294	1.0	1.0	0.0	NA	1	NA	NA	NA	NA	KRBA1_exon_chr7:149430294
1	DDHD1	5.828	8.7454	0.6123	1.0	NC	No	No	1	DDHD1_exon_chr14:53513667	1.0	1.0	0.0	NA	3	NA	NA	NA	NA	DDHD1_exon_chr14:53513667
1	KHDC4	50.7467	33.1669	-0.6072	1.0	NC	No	No	1	KHDC4_exon_chr1:155884111	1.0	1.0	0.0	NA	2	0.9065	1.0	0.0935	NA	KHDC4_exon_chr1:155884111
1	MED20	55.472	58.7302	0.0727	1.0	NC	No	No	1	MED20_exon_chr6:41875025	1.0	1.0	0.0	NA	1	NA	NA	NA	NA	MED20_exon_chr6:41875025
1	KDM7A-DT	3.0015	0.0	-4.0858	1.0	NC	No	No	1	KDM7A-DT_exon_chr7:139877060	1.0	1.0	0.0	NA	1	NA	NA	NA	NA	KDM7A-DT_exon_chr7:139877060
1	C11orf71	18.7431	19.2216	0.0615	1.0	NC	No	No	1	C11orf71_exon_chr11:114271233	1.0	1.0	0.0	NA	3	NA	NA	NA	NA	C11orf71_exon_chr11:114271233
1	FCHO1	17.8776	2.315	-2.9288	0.7195	NC	No	No	1	FCHO1_exon_chr19:17899078	1.0	1.0	0.0	NA	1	NA	NA	NA	NA	FCHO1_exon_chr19:17899078
1	UROD	196.8307	216.5464	0.1382	1.0	NC	No	No	1	UROD_exon_chr1:45481008	1.0	1.0	0.0	NA	1	NA	NA	NA	NA	UROD_exon_chr1:45481008
1	ESYT2	190.8989	168.6701	-0.1925	1.0	NC	No	No	1	ESYT2_exon_chr7:158526943	1.0	1.0	0.0	NA	8	0.1523	0.1672	0.0149	NA	ESYT2_exon_chr7:158526943
1	NAT14	6.0644	0.0	-5.1175	1.0	NC	No	No	1	NAT14_exon_chr19:55997774	1.0	1.0	0.0	NA	1	NA	NA	NA	NA	NAT14_exon_chr19:55997774
1	HMGN1	1688.0108	1597.0413	-0.0777	0.8365	NC	No	No	2	HMGN1_exon_chr21:40715085	0.9606	0.8792	-0.0815	NA	1	NA	NA	NA	NA	HMGN1_exon_chr21:40715085
2	HMGN1									HMGN1_exon_chr21:40717200	0.0394	0.1208	0.0815	NA	2	0.3642	0.5435	0.1793	NA	HMGN1_exon_chr21:40717200
1	PIF1	51.5111	35.2849	-0.5441	1.0	NC	No	No	1	PIF1_exon_chr15:65108556	1.0	1.0	0.0	NA	1	NA	NA	NA	NA	PIF1_exon_chr15:65108556
1	GLTPD2	19.9056	16.3177	-0.2985	1.0	NC	No	No	1	GLTPD2_exon_chr17:4693053	1.0	1.0	0.0	NA	1	NA	NA	NA	NA	GLTPD2_exon_chr17:4693053
1	H2AJ	744.1504	867.3144	0.2267	0.605	NC	No	No	1	H2AJ_exon_chr12:14927269	1.0	1.0	0.0	NA	1	NA	NA	NA	NA	H2AJ_exon_chr12:14927269
1	SNX12	175.5699	161.9577	-0.125	1.0	NC	No	No	1	SNX12_exon_chrX:70280968	1.0	1.0	0.0	NA	1	NA	NA	NA	NA	SNX12_exon_chrX:70280968
1	PIK3R3	29.9616	26.7305	-0.1707	1.0	NC	No	No	2	PIK3R3_exon_chr1:46509543	0.9401	0.5326	-0.4075	NA	1	NA	NA	NA	NA	PIK3R3_exon_chr1:46509543
2	PIK3R3									PIK3R3_exon_chr1:46527743	0.0599	0.4674	0.4075	NA	1	NA	NA	NA	NA	PIK3R3_exon_chr1:46527743
1	TAF1A	21.5257	19.7264	-0.1468	1.0	NC	No	No	1	TAF1A_exon_chr1:222732114	1.0	1.0	0.0	NA	1	NA	NA	NA	NA	TAF1A_exon_chr1:222732114
1	CTXN1	0.0	2.0577	3.5108	1.0	NC	No	No	1	CTXN1_exon_chr19:7990443	1.0	1.0	0.0	NA	1	NA	NA	NA	NA	CTXN1_exon_chr19:7990443
1	LRRC61	42.7623	36.8754	-0.1918	1.0	NC	No	No	1	LRRC61_exon_chr7:150033806	1.0	1.0	0.0	NA	1	NA	NA	NA	NA	LRRC61_exon_chr7:150033806
1	GORASP2	213.5141	187.4775	-0.1881	1.0	NC	No	No	1	GORASP2_exon_chr2:171822299	1.0	1.0	0.0	NA	4	0.6397	0.5906	-0.049	NA	GORASP2_exon_chr2:171822299
1	RPEL1	29.7095	7.0194	-2.0751	0.8679	NC	No	No	1	RPEL1_exon_chr10:105005643	1.0	1.0	0.0	NA	2	NA	NA	NA	NA	RPEL1_exon_chr10:105005643
1	PHF1	57.8568	66.7394	0.2182	1.0	NC	No	No	1	PHF1_exon_chr6:33383586	1.0	1.0	0.0	NA	1	NA	NA	NA	NA	PHF1_exon_chr6:33383586
1	TRA2A	694.6877	683.513	-0.0194	0.9338	NC	No	No	1	TRA2A_exon_chr7:23545188	1.0	1.0	0.0	NA	2	0.5226	0.4503	-0.0723	NA	TRA2A_exon_chr7:23545188
1	ERVK3-1	46.9461	42.8114	-0.1135	1.0	NC	No	No	1	ERVK3-1_exon_chr19:58826113	1.0	1.0	0.0	NA	4	0.5657	0.7155	0.1498	NA	ERVK3-1_exon_chr19:58826113
1	LOC101928505	0.0	16.7183	6.5211	0.3527	NC	No	No	1	LOC101928505_exon_chr5:56965516	1.0	1.0	0.0	NA	1	NA	NA	NA	NA	LOC101928505_exon_chr5:56965516
1	EARS2	23.3457	42.9562	0.9001	1.0	NC	No	No	1	EARS2_exon_chr16:23535775	1.0	1.0	0.0	NA	5	0.5081	0.1684	-0.3397	NA	EARS2_exon_chr16:23535775
1	MCRS1	49.0763	51.264	0.045	1.0	NC	No	No	1	MCRS1_exon_chr12:49952512	1.0	1.0	0.0	NA	1	NA	NA	NA	NA	MCRS1_exon_chr12:49952512
1	LGALS3BP	20.5935	20.6412	0.0083	1.0	NC	No	No	1	LGALS3BP_exon_chr17:76968786	1.0	1.0	0.0	NA	1	NA	NA	NA	NA	LGALS3BP_exon_chr17:76968786
1	GCDH	29.9886	14.7274	-1.0388	1.0	NC	No	No	1	GCDH_exon_chr19:13010281	1.0	1.0	0.0	NA	3	NA	NA	NA	NA	GCDH_exon_chr19:13010281
1	MYLPF	127.6029	83.323	-0.6131	1.0	NC	No	No	1	MYLPF_exon_chr16:30389116	1.0	1.0	0.0	NA	1	NA	NA	NA	NA	MYLPF_exon_chr16:30389116
1	NTN1	10.6889	15.8625	0.6064	1.0	NC	No	No	1	NTN1_exon_chr17:9142956	1.0	1.0	0.0	NA	1	NA	NA	NA	NA	NTN1_exon_chr17:9142956
1	TCF3	79.4032	65.2275	-0.2795	1.0	NC	No	No	1	TCF3_exon_chr19:1611848	1.0	1.0	0.0	NA	4	0.3961	0.2293	-0.1669	NA	TCF3_exon_chr19:1611848
1	MBD6	66.9582	69.2941	0.0435	1.0	NC	No	No	1	MBD6_exon_chr12:57922942	1.0	1.0	0.0	NA	1	NA	NA	NA	NA	MBD6_exon_chr12:57922942
1	TTC8	8.9618	2.8819	-1.6565	1.0	NC	No	No	1	TTC8_exon_chr14:89343637	1.0	1.0	0.0	NA	1	NA	NA	NA	NA	TTC8_exon_chr14:89343637
1	ERBB3	119.1223	192.4784	0.6982	0.5585	NC	No	No	2	ERBB3_exon_chr12:56478778	0.1635	0.0533	-0.1102	NA	1	NA	NA	NA	NA	ERBB3_exon_chr12:56478778
2	ERBB3									ERBB3_exon_chr12:56495312	0.8365	0.9467	0.1102	NA	1	NA	NA	NA	NA	ERBB3_exon_chr12:56495312
1	MORF4L1	1330.3259	1472.2563	0.1422	0.7565	NC	No	No	1	MORF4L1_exon_chr15:79189324	1.0	1.0	0.0	NA	3	0.7072	0.7109	0.0036	NA	MORF4L1_exon_chr15:79189324
1	LINC00324	4.3357	11.0669	1.3282	1.0	NC	No	No	1	LINC00324_exon_chr17:8124827	1.0	1.0	0.0	NA	1	NA	NA	NA	NA	LINC00324_exon_chr17:8124827
1	ORMDL3	62.946	26.9635	-1.2266	1.0	NC	No	No	1	ORMDL3_exon_chr17:38078938	1.0	1.0	0.0	NA	1	NA	NA	NA	NA	ORMDL3_exon_chr17:38078938
1	NUDT14	160.3518	185.049	0.2115	1.0	NC	No	No	1	NUDT14_exon_chr14:105639598	1.0	1.0	0.0	NA	1	NA	NA	NA	NA	NUDT14_exon_chr14:105639598
1	TIMM44	148.3659	117.9129	-0.3331	1.0	NC	No	No	1	TIMM44_exon_chr19:7992191	1.0	1.0	0.0	NA	1	NA	NA	NA	NA	TIMM44_exon_chr19:7992191
1	WDR34	624.0834	653.8061	0.0668	0.9022	NC	No	No	1	WDR34_exon_chr9:131396261	1.0	1.0	0.0	NA	1	NA	NA	NA	NA	WDR34_exon_chr9:131396261
1	IRF9	0.4411	13.3365	4.5967	0.5251	NC	No	No	1	IRF9_exon_chr14:24635330	1.0	1.0	0.0	NA	1	NA	NA	NA	NA	IRF9_exon_chr14:24635330
1	TMEM64	11.1102	18.4233	0.7183	1.0	NC	No	No	1	TMEM64_exon_chr8:91638090	1.0	1.0	0.0	NA	3	NA	NA	NA	NA	TMEM64_exon_chr8:91638090
1	KTN1-AS1	11.3451	0.0	-6.0443	1.0	NC	No	No	1	KTN1-AS1_exon_chr14:56044097	1.0	1.0	0.0	NA	1	NA	NA	NA	NA	KTN1-AS1_exon_chr14:56044097
1	FAM122C	1.2006	9.2598	3.0655	1.0	NC	No	No	1	FAM122C_exon_chrX:133943216	1.0	1.0	0.0	NA	1	NA	NA	NA	NA	FAM122C_exon_chrX:133943216
1	EXOSC1	82.1675	225.6327	1.4495	0.0423	UP	No	No	1	EXOSC1_exon_chr10:99196308	1.0	1.0	0.0	NA	2	0.2925	0.2812	-0.0112	NA	EXOSC1_exon_chr10:99196308
1	LOC100132215	8.4141	8.2563	-0.0499	1.0	NC	No	No	1	LOC100132215_exon_chr2:63272578	1.0	1.0	0.0	NA	1	NA	NA	NA	NA	LOC100132215_exon_chr2:63272578
1	TOLLIP-AS1	0.2205	1.9934	2.5186	1.0	NC	No	No	1	TOLLIP-AS1_exon_chr11:1330937	1.0	1.0	0.0	NA	1	NA	NA	NA	NA	TOLLIP-AS1_exon_chr11:1330937
1	ZNF629	9.3301	0.3215	-4.7978	1.0	NC	No	No	1	ZNF629_exon_chr16:30795594	1.0	1.0	0.0	NA	1	NA	NA	NA	NA	ZNF629_exon_chr16:30795594
1	ECT2	202.8675	218.9494	0.0996	1.0	NC	No	No	1	ECT2_exon_chr3:172537937	1.0	1.0	0.0	NA	3	0.614	0.7056	0.0916	NA	ECT2_exon_chr3:172537937
1	ATG9A	165.9536	141.3139	-0.2449	1.0	NC	No	No	1	ATG9A_exon_chr2:220085174	1.0	1.0	0.0	NA	1	NA	NA	NA	NA	ATG9A_exon_chr2:220085174
1	RGMB-AS1	1.7643	14.7089	2.9797	0.8303	NC	No	No	1	RGMB-AS1_exon_chr5:98106888	1.0	1.0	0.0	NA	2	NA	NA	NA	NA	RGMB-AS1_exon_chr5:98106888
1	PREPL	102.7591	48.4389	-1.0961	0.9037	NC	No	No	1	PREPL_exon_chr2:44548584	1.0	1.0	0.0	NA	4	0.589	0.6459	0.0569	NA	PREPL_exon_chr2:44548584
1	NUDCD1	67.8045	99.8012	0.5421	1.0	NC	No	No	1	NUDCD1_exon_chr8:110255530	1.0	1.0	0.0	NA	4	0.2708	0.1428	-0.1281	NA	NUDCD1_exon_chr8:110255530
1	LOC102725021	0.0	2.2236	3.6007	1.0	NC	No	No	1	LOC102725021_exon_chr15:30917981	1.0	1.0	0.0	NA	1	NA	NA	NA	NA	LOC102725021_exon_chr15:30917981
1	MRPS10	41.8709	79.0685	0.8954	1.0	NC	No	No	1	MRPS10_exon_chr6:42176110	1.0	1.0	0.0	NA	5	NA	NA	NA	NA	MRPS10_exon_chr6:42176110
1	SENP3-EIF4A1	44.3702	37.8104	-0.2073	1.0	NC	No	No	1	SENP3-EIF4A1_exon_chr17:7474690	1.0	1.0	0.0	NA	1	NA	NA	NA	NA	SENP3-EIF4A1_exon_chr17:7474690
1	MAPK1	96.4976	93.13	-0.0574	1.0	NC	No	No	2	MAPK1_exon_chr22:22118529	0.9022	0.8725	-0.0297	NA	1	NA	NA	NA	NA	MAPK1_exon_chr22:22118529
2	MAPK1									MAPK1_exon_chr22:22123609	0.0978	0.1275	0.0297	NA	2	0.8508	0.7864	-0.0645	NA	MAPK1_exon_chr22:22123609
1	ARHGEF5	11.7834	16.0148	0.4217	1.0	NC	No	No	1	ARHGEF5_exon_chr7:144076991	1.0	1.0	0.0	NA	1	NA	NA	NA	NA	ARHGEF5_exon_chr7:144076991
1	DISP1	18.7892	6.6911	-1.4904	0.8395	NC	No	No	1	DISP1_exon_chr1:223175726	1.0	1.0	0.0	NA	1	NA	NA	NA	NA	DISP1_exon_chr1:223175726
1	RAB28	10.2959	13.3753	0.3677	1.0	NC	No	No	1	RAB28_exon_chr4:13370274	1.0	1.0	0.0	NA	1	NA	NA	NA	NA	RAB28_exon_chr4:13370274
1	ITGB1BP2	1.6259	7.0415	2.0834	1.0	NC	No	No	1	ITGB1BP2_exon_chrX:70524814	1.0	1.0	0.0	NA	1	NA	NA	NA	NA	ITGB1BP2_exon_chrX:70524814
1	ALG2	111.4296	76.4497	-0.536	1.0	NC	No	No	2	ALG2_exon_chr9:101981118	0.9707	0.8622	-0.1085	NA	3	0.3888	0.2902	-0.0986	NA	ALG2_exon_chr9:101981118
2	ALG2									ALG2_exon_chr9:101983419	0.0293	0.1378	0.1085	NA	1	NA	NA	NA	NA	ALG2_exon_chr9:101983419
1	TPD52	131.971	45.8206	-1.5309	0.9257	NC	No	No	1	TPD52_exon_chr8:80950470	1.0	1.0	0.0	NA	6	NA	NA	NA	NA	TPD52_exon_chr8:80950470
1	JRKL	6.265	12.2383	0.9404	1.0	NC	No	No	1	JRKL_exon_chr11:96123176	1.0	1.0	0.0	NA	2	NA	NA	NA	NA	JRKL_exon_chr11:96123176
1	AGT	64.6374	15.3039	-2.0751	1.0	NC	No	No	1	AGT_exon_chr1:230839075	1.0	1.0	0.0	NA	2	NA	NA	NA	NA	AGT_exon_chr1:230839075
1	YIPF2	118.9214	95.312	-0.3077	1.0	NC	No	No	1	YIPF2_exon_chr19:11033850	1.0	1.0	0.0	NA	3	0.8925	0.8767	-0.0158	NA	YIPF2_exon_chr19:11033850
1	RAD50	95.9304	144.5165	0.6023	1.0	NC	No	No	4	RAD50_exon_chr5:131924378	0.0544	0.2004	0.146	NA	1	NA	NA	NA	NA	RAD50_exon_chr5:131924378
2	RAD50									RAD50_exon_chr5:131927568	0.1729	0.1806	0.0077	NA	1	NA	NA	NA	NA	RAD50_exon_chr5:131927568
3	RAD50									RAD50_exon_chr5:131944808	0.0482	0.0847	0.0365	NA	1	NA	NA	NA	NA	RAD50_exon_chr5:131944808
4	RAD50									RAD50_exon_chr5:131977869	0.6457	0.513	-0.1327	NA	7	0.2168	0.1986	-0.0181	NA	RAD50_exon_chr5:131977869
1	DGKZ	118.348	43.8673	-1.4198	0.5431	NC	No	No	1	DGKZ_exon_chr11:46401380	1.0	1.0	0.0	NA	1	NA	NA	NA	NA	DGKZ_exon_chr11:46401380
1	CEP41	25.5175	10.7387	-1.2244	1.0	NC	No	No	1	CEP41_exon_chr7:130038880	1.0	1.0	0.0	NA	4	NA	NA	NA	NA	CEP41_exon_chr7:130038880
1	NSRP1	151.7896	211.9348	0.4841	1.0	NC	No	No	1	NSRP1_exon_chr17:28511632	1.0	1.0	0.0	NA	5	0.4633	0.2226	-0.2408	NA	NSRP1_exon_chr17:28511632
1	NOP56	981.4134	988.399	0.0119	0.9476	NC	No	No	2	NOP56_exon_chr20:2637584	0.0165	0.0862	0.0697	NA	1	NA	NA	NA	NA	NOP56_exon_chr20:2637584
2	NOP56									NOP56_exon_chr20:2638574	0.9661	0.8979	-0.0682	NA	1	NA	NA	NA	NA	NOP56_exon_chr20:2638574
1	CREG2	6.0031	0.0	-5.1024	1.0	NC	No	No	1	CREG2_exon_chr2:101967532	1.0	1.0	0.0	NA	1	NA	NA	NA	NA	CREG2_exon_chr2:101967532
1	CNIH4	222.2001	148.0001	-0.5868	0.8916	NC	No	No	1	CNIH4_exon_chr1:224563496	1.0	1.0	0.0	NA	1	NA	NA	NA	NA	CNIH4_exon_chr1:224563496
1	DHFR	330.837	352.6669	0.0943	0.8857	NC	No	No	1	DHFR_exon_chr5:79924984	1.0	1.0	0.0	NA	4	0.6045	0.6504	0.0459	NA	DHFR_exon_chr5:79924984
1	LUZP1	46.4302	181.9435	2.0071	0.0702	UP	Yes	No	2	LUZP1_exon_chr1:23415546	0.4187	0.1876	-0.2311	NA	3	NA	NA	NA	NA	LUZP1_exon_chr1:23415546
2	LUZP1									LUZP1_exon_chr1:23420873	0.5813	0.8124	0.2311	Up	1	NA	NA	NA	NA	LUZP1_exon_chr1:23420873
1	OTUD3	1.3549	6.7516	2.2857	1.0	NC	No	No	1	OTUD3_exon_chr1:20234062	1.0	1.0	0.0	NA	1	NA	NA	NA	NA	OTUD3_exon_chr1:20234062
1	MYH9	1215.3262	910.8601	-0.4137	0.1093	NC	No	Yes	1	MYH9_exon_chr22:36678831	1.0	1.0	0.0	NA	4	0.6547	0.5607	-0.094	Shortening	MYH9_exon_chr22:36678831
1	LINC00641	18.916	1.5433	-3.5662	0.6331	NC	No	No	1	LINC00641_exon_chr14:21673662	1.0	1.0	0.0	NA	3	NA	NA	NA	NA	LINC00641_exon_chr14:21673662
1	HAUS1	40.0649	81.931	1.0328	1.0	NC	No	No	1	HAUS1_exon_chr18:43708040	1.0	1.0	0.0	NA	1	NA	NA	NA	NA	HAUS1_exon_chr18:43708040
1	MALSU1	101.6399	121.9832	0.2685	1.0	NC	No	No	1	MALSU1_exon_chr7:23348974	1.0	1.0	0.0	NA	3	0.0996	0.0	-0.0996	NA	MALSU1_exon_chr7:23348974
1	LINC01547	1.3549	7.3946	2.416	1.0	NC	No	No	1	LINC01547_exon_chr21:46354283	1.0	1.0	0.0	NA	1	NA	NA	NA	NA	LINC01547_exon_chr21:46354283
1	MAP2K7	17.2722	36.7454	1.0616	1.0	NC	No	No	1	MAP2K7_exon_chr19:7977181	1.0	1.0	0.0	NA	1	NA	NA	NA	NA	MAP2K7_exon_chr19:7977181
1	RLF	54.2599	87.5168	0.6997	1.0	NC	No	No	1	RLF_exon_chr1:40701463	1.0	1.0	0.0	NA	3	0.9602	0.8097	-0.1505	NA	RLF_exon_chr1:40701463
1	ZRANB1	52.9239	51.3235	-0.0217	1.0	NC	No	No	1	ZRANB1_exon_chr10:126673342	1.0	1.0	0.0	NA	4	0.5948	0.8187	0.2239	NA	ZRANB1_exon_chr10:126673342
1	POLA2	68.6121	115.7369	0.734	1.0	NC	No	No	1	POLA2_exon_chr11:65064590	1.0	1.0	0.0	NA	1	NA	NA	NA	NA	POLA2_exon_chr11:65064590
1	RNF217	49.075	45.6525	-0.0836	1.0	NC	No	No	1	RNF217_exon_chr6:125404009	1.0	1.0	0.0	NA	6	NA	NA	NA	NA	RNF217_exon_chr6:125404009
1	USP24	78.2866	59.348	-0.3944	1.0	NC	No	No	1	USP24_exon_chr1:55534780	1.0	1.0	0.0	NA	5	0.4258	0.7318	0.3059	NA	USP24_exon_chr1:55534780
1	CBWD2	400.9536	396.9837	-0.0175	0.9336	NC	No	No	1	CBWD2_exon_chr2:114253213	1.0	1.0	0.0	NA	3	0.2627	0.1975	-0.0652	NA	CBWD2_exon_chr2:114253213
1	OGT	90.5699	127.803	0.5123	1.0	NC	No	No	1	OGT_exon_chrX:70793469	1.0	1.0	0.0	NA	6	0.4105	0.4391	0.0286	NA	OGT_exon_chrX:70793469
1	RCC1L	33.5456	53.9212	0.6888	1.0	NC	No	No	1	RCC1L_exon_chr7:74457217	1.0	1.0	0.0	NA	2	0.887	0.7304	-0.1566	NA	RCC1L_exon_chr7:74457217
1	RSBN1	13.011	37.2398	1.5493	1.0	NC	No	No	1	RSBN1_exon_chr1:114309075	1.0	1.0	0.0	NA	2	NA	NA	NA	NA	RSBN1_exon_chr1:114309075
1	PACS2	33.1294	26.7916	-0.316	1.0	NC	No	No	1	PACS2_exon_chr14:105860890	1.0	1.0	0.0	NA	2	NA	NA	NA	NA	PACS2_exon_chr14:105860890
1	ZNF658	7.4981	7.4593	-0.0151	1.0	NC	No	No	1	ZNF658_exon_chr9:40775036	1.0	1.0	0.0	NA	1	NA	NA	NA	NA	ZNF658_exon_chr9:40775036
1	RAPGEF1	408.0134	359.0631	-0.1915	0.7551	NC	No	No	1	RAPGEF1_exon_chr9:134455034	1.0	1.0	0.0	NA	1	NA	NA	NA	NA	RAPGEF1_exon_chr9:134455034
1	DEPDC5	15.8168	26.5417	0.7562	1.0	NC	No	No	1	DEPDC5_exon_chr22:32302190	1.0	1.0	0.0	NA	1	NA	NA	NA	NA	DEPDC5_exon_chr22:32302190
1	ZNF641	16.0877	6.5471	-1.2924	0.9388	NC	No	No	1	ZNF641_exon_chr12:48737510	1.0	1.0	0.0	NA	2	NA	NA	NA	NA	ZNF641_exon_chr12:48737510
1	NXF2B	4.5691	9.2598	1.0387	1.0	NC	No	No	2	NXF2B_exon_chrX:101581383	0.262	0.5	0.238	NA	1	NA	NA	NA	NA	NXF2B_exon_chrX:101581383
2	NXF2B									NXF2B_exon_chrX:101615566	0.738	0.5	-0.238	NA	1	NA	NA	NA	NA	NXF2B_exon_chrX:101615566
1	GIT2	41.9744	13.8506	-1.5942	0.8518	NC	No	No	1	GIT2_exon_chr12:110370995	1.0	1.0	0.0	NA	2	NA	NA	NA	NA	GIT2_exon_chr12:110370995
1	SMN1	828.0207	1004.6237	0.2803	0.5848	NC	No	No	2	SMN1_exon_chr5:69372845	0.5051	0.5047	-0.0004	NA	1	NA	NA	NA	NA	SMN1_exon_chr5:69372845
2	SMN1									SMN1_exon_chr5:70248265	0.4949	0.4953	0.0004	NA	1	NA	NA	NA	NA	SMN1_exon_chr5:70248265
1	PPP1R1C	22.9206	51.3132	1.1654	1.0	NC	No	No	2	PPP1R1C_exon_chr2:182981933	0.8342	1.0	0.1658	NA	2	NA	NA	NA	NA	PPP1R1C_exon_chr2:182981933
2	PPP1R1C									PPP1R1C_exon_chr2:182993700	0.1658	0.0	-0.1658	NA	1	NA	NA	NA	NA	PPP1R1C_exon_chr2:182993700
1	ARID1B	57.4959	79.9165	0.5014	1.0	NC	No	No	1	ARID1B_exon_chr6:157527300	1.0	1.0	0.0	NA	2	0.4819	0.6745	0.1926	NA	ARID1B_exon_chr6:157527300
1	PHF23	122.6401	155.7984	0.3596	0.9489	NC	No	No	1	PHF23_exon_chr17:7139159	1.0	1.0	0.0	NA	3	0.1273	0.2649	0.1376	NA	PHF23_exon_chr17:7139159
1	ZNF609	15.0509	9.1802	-0.7167	1.0	NC	No	No	1	ZNF609_exon_chr15:64973890	1.0	1.0	0.0	NA	1	NA	NA	NA	NA	ZNF609_exon_chr15:64973890
1	GTF2H5	178.7789	136.4142	-0.385	1.0	NC	No	No	1	GTF2H5_exon_chr6:158613008	1.0	1.0	0.0	NA	3	0.4237	0.4041	-0.0197	NA	GTF2H5_exon_chr6:158613008
1	NENF	26.8448	7.7808	-1.772	0.8302	NC	No	No	1	NENF_exon_chr1:212619171	1.0	1.0	0.0	NA	1	NA	NA	NA	NA	NENF_exon_chr1:212619171
1	SGTB	71.0527	21.7714	-1.7133	1.0	NC	No	No	1	SGTB_exon_chr5:64966184	1.0	1.0	0.0	NA	4	NA	NA	NA	NA	SGTB_exon_chr5:64966184
1	LOC100506302	1.3549	5.0798	1.873	1.0	NC	No	No	1	LOC100506302_exon_chr7:155435664	1.0	1.0	0.0	NA	2	NA	NA	NA	NA	LOC100506302_exon_chr7:155435664
1	ZSCAN21	54.4104	42.06	-0.3704	1.0	NC	No	No	1	ZSCAN21_exon_chr7:99661410	1.0	1.0	0.0	NA	1	NA	NA	NA	NA	ZSCAN21_exon_chr7:99661410
1	FYCO1	2.4388	10.5898	2.0807	1.0	NC	No	No	1	FYCO1_exon_chr3:45963332	1.0	1.0	0.0	NA	2	NA	NA	NA	NA	FYCO1_exon_chr3:45963332
1	RABGAP1L	5.2356	33.0499	2.7682	0.9016	NC	No	No	4	RABGAP1L_exon_chr1:174213435	0.0	0.0951	0.0951	NA	1	NA	NA	NA	NA	RABGAP1L_exon_chr1:174213435
2	RABGAP1L									RABGAP1L_exon_chr1:174927027	0.0	0.1559	0.1559	NA	1	NA	NA	NA	NA	RABGAP1L_exon_chr1:174927027
3	RABGAP1L									RABGAP1L_exon_chr1:174947943	0.0	0.1348	0.1348	NA	3	NA	NA	NA	NA	RABGAP1L_exon_chr1:174947943
4	RABGAP1L									RABGAP1L_exon_chr1:174958985	1.0	0.5596	-0.4404	NA	1	NA	NA	NA	NA	RABGAP1L_exon_chr1:174958985
1	LIN7C	227.0304	147.518	-0.6252	0.6417	NC	No	No	1	LIN7C_exon_chr11:27520351	1.0	1.0	0.0	NA	9	0.8599	0.8054	-0.0545	NA	LIN7C_exon_chr11:27520351
1	ZSCAN12P1	6.5036	10.3527	0.6599	1.0	NC	No	No	1	ZSCAN12P1_exon_chr6:28060116	1.0	1.0	0.0	NA	3	NA	NA	NA	NA	ZSCAN12P1_exon_chr6:28060116
1	RAB24	49.6417	29.8036	-0.7409	1.0	NC	No	No	1	RAB24_exon_chr5:176728808	1.0	1.0	0.0	NA	1	NA	NA	NA	NA	RAB24_exon_chr5:176728808
1	STX16	25.1912	27.94	0.133878632943899	NA	NC	No	No	1	STX16_exon_chr20:57251242	1.0	1.0	0.0	NA	2	NA	NA	NA	NA	STX16_exon_chr20:57251242
1	TRAPPC4	57.4966	30.7492	-0.8961	1.0	NC	No	No	1	TRAPPC4_exon_chr11:118894030	1.0	1.0	0.0	NA	2	0.1347	0.0149	-0.1198	NA	TRAPPC4_exon_chr11:118894030
1	POLR2A	153.6152	143.6054	-0.0976	1.0	NC	No	No	1	POLR2A_exon_chr17:7416339	1.0	1.0	0.0	NA	1	NA	NA	NA	NA	POLR2A_exon_chr17:7416339
1	USO1	279.0468	292.067	0.0585	1.0	NC	No	No	1	USO1_exon_chr4:76734358	1.0	1.0	0.0	NA	3	0.8176	0.8157	-0.0019	NA	USO1_exon_chr4:76734358
1	MPP6	40.8752	31.4281	-0.3921	1.0	NC	No	No	1	MPP6_exon_chr7:24727056	1.0	1.0	0.0	NA	6	NA	NA	NA	NA	MPP6_exon_chr7:24727056
1	PKMYT1	34.7217	13.2976	-1.3848	1.0	NC	No	No	1	PKMYT1_exon_chr16:3023065	1.0	1.0	0.0	NA	1	NA	NA	NA	NA	PKMYT1_exon_chr16:3023065
1	ZZZ3	61.9166	64.5116	0.0613	1.0	NC	No	No	1	ZZZ3_exon_chr1:78031469	1.0	1.0	0.0	NA	4	0.4046	0.1638	-0.2408	NA	ZZZ3_exon_chr1:78031469
1	ITPR1	4.6432	12.6369	1.4907	1.0	NC	No	No	1	ITPR1_exon_chr3:4887822	1.0	1.0	0.0	NA	1	NA	NA	NA	NA	ITPR1_exon_chr3:4887822
1	KIF18A	56.4386	38.7728	-0.5202	1.0	NC	No	No	1	KIF18A_exon_chr11:28042829	1.0	1.0	0.0	NA	3	0.8143	0.4431	-0.3712	NA	KIF18A_exon_chr11:28042829
1	UBXN7	46.0282	76.9092	0.7178	1.0	NC	No	No	1	UBXN7_exon_chr3:196083717	1.0	1.0	0.0	NA	1	NA	NA	NA	NA	UBXN7_exon_chr3:196083717
1	MVK	80.471	113.321	0.4927	1.0	NC	No	No	1	MVK_exon_chr12:110034230	1.0	1.0	0.0	NA	1	NA	NA	NA	NA	MVK_exon_chr12:110034230
1	PEX10	9.1331	15.6905	0.7947	0.9993	NC	No	No	1	PEX10_exon_chr1:2337273	1.0	1.0	0.0	NA	1	NA	NA	NA	NA	PEX10_exon_chr1:2337273
1	APBA3	10.6185	7.2462	-0.5507	1.0	NC	No	No	1	APBA3_exon_chr19:3751095	1.0	1.0	0.0	NA	1	NA	NA	NA	NA	APBA3_exon_chr19:3751095
1	SNHG15	108.1621	58.0834	-0.8822	1.0	NC	No	No	1	SNHG15_exon_chr7:45022921	1.0	1.0	0.0	NA	1	NA	NA	NA	NA	SNHG15_exon_chr7:45022921
1	PSMG2	271.4767	210.0628	-0.3754	0.9519	NC	No	No	1	PSMG2_exon_chr18:12725437	1.0	1.0	0.0	NA	2	0.7817	0.696	-0.0857	NA	PSMG2_exon_chr18:12725437
1	MTUS1	139.0274	171.7346	0.3261	1.0	NC	No	No	2	MTUS1_exon_chr8:17503648	0.6066	0.427	-0.1796	NA	1	NA	NA	NA	NA	MTUS1_exon_chr8:17503648
2	MTUS1									MTUS1_exon_chr8:17510790	0.3934	0.573	0.1796	NA	2	0.5303	0.7606	0.2303	NA	MTUS1_exon_chr8:17510790
1	SRSF9	536.2301	337.8573	-0.669	0.1336	NC	No	No	1	SRSF9_exon_chr12:120899965	1.0	1.0	0.0	NA	1	NA	NA	NA	NA	SRSF9_exon_chr12:120899965
1	FAM222B	20.3601	18.7433	-0.1252	1.0	NC	No	No	1	FAM222B_exon_chr17:27086894	1.0	1.0	0.0	NA	2	NA	NA	NA	NA	FAM222B_exon_chr17:27086894
1	ITPKC	111.9339	134.822	0.278	1.0	NC	No	No	1	ITPKC_exon_chr19:41245261	1.0	1.0	0.0	NA	1	NA	NA	NA	NA	ITPKC_exon_chr19:41245261
1	KLHL28	39.4148	54.091	0.4516	1.0	NC	No	No	1	KLHL28_exon_chr14:45398394	1.0	1.0	0.0	NA	2	NA	NA	NA	NA	KLHL28_exon_chr14:45398394
1	TBC1D19	1.6259	4.8871	1.5693	1.0	NC	No	No	1	TBC1D19_exon_chr4:26756494	1.0	1.0	0.0	NA	1	NA	NA	NA	NA	TBC1D19_exon_chr4:26756494
1	SYNGR3	3.2518	0.0	-4.2465	1.0	NC	No	No	1	SYNGR3_exon_chr16:2042863	1.0	1.0	0.0	NA	1	NA	NA	NA	NA	SYNGR3_exon_chr16:2042863
1	TMEM99	44.5525	52.9131	0.2545	1.0	NC	No	No	1	TMEM99_exon_chr17:38990633	1.0	1.0	0.0	NA	3	NA	NA	NA	NA	TMEM99_exon_chr17:38990633
1	SORT1	441.9327	325.3938	-0.4387	0.346	NC	No	No	1	SORT1_exon_chr1:109856679	1.0	1.0	0.0	NA	7	0.4902	0.4706	-0.0197	NA	SORT1_exon_chr1:109856679
1	SHMT2	212.3365	195.5083	-0.1166	1.0	NC	No	No	1	SHMT2_exon_chr12:57628016	1.0	1.0	0.0	NA	2	0.0334	0.1317	0.0983	NA	SHMT2_exon_chr12:57628016
1	HIP1	34.7625	57.3378	0.6989	1.0	NC	No	No	1	HIP1_exon_chr7:75167545	1.0	1.0	0.0	NA	3	1.0	0.9481	NA	NA	HIP1_exon_chr7:75167545
1	RNGTT	28.5509	32.7286	0.189	1.0	NC	No	No	1	RNGTT_exon_chr6:89322601	1.0	1.0	0.0	NA	4	NA	NA	NA	NA	RNGTT_exon_chr6:89322601
1	CKAP2	175.454	216.6084	0.3106	0.9251	NC	No	No	3	CKAP2_exon_chr13:53029494	0.0952	0.058	-0.0372	NA	5	0.5817	0.6488	0.0671	NA	CKAP2_exon_chr13:53029494
2	CKAP2									CKAP2_exon_chr13:53035030	0.0853	0.0708	-0.0145	NA	1	NA	NA	NA	NA	CKAP2_exon_chr13:53035030
3	CKAP2									CKAP2_exon_chr13:53049029	0.8195	0.8712	0.0517	NA	1	NA	NA	NA	NA	CKAP2_exon_chr13:53049029
1	SBF2	65.3828	82.9242	0.3715	1.0	NC	No	No	1	SBF2_exon_chr11:9802063	1.0	1.0	0.0	NA	4	0.6988	0.9105	0.2117	NA	SBF2_exon_chr11:9802063
1	EMC9	45.8891	17.5905	-1.3791	0.8197	NC	No	No	1	EMC9_exon_chr14:24608405	1.0	1.0	0.0	NA	1	NA	NA	NA	NA	EMC9_exon_chr14:24608405
1	UBFD1	153.9178	146.2428	-0.0636	1.0	NC	No	No	1	UBFD1_exon_chr16:23581800	1.0	1.0	0.0	NA	2	0.6639	0.7831	0.1191	NA	UBFD1_exon_chr16:23581800
1	RPL21	1784.3054	1981.3749	0.1517	0.6082	NC	No	No	1	RPL21_exon_chr13:27830572	1.0	1.0	0.0	NA	1	NA	NA	NA	NA	RPL21_exon_chr13:27830572
1	SLC12A7	5.0477	3.0222	-0.7518	1.0	NC	No	No	1	SLC12A7_exon_chr5:1052566	1.0	1.0	0.0	NA	1	NA	NA	NA	NA	SLC12A7_exon_chr5:1052566
1	CBWD1	355.2716	348.5786	-0.0345	0.923	NC	No	No	1	CBWD1_exon_chr9:121573	1.0	1.0	0.0	NA	3	0.3102	0.2693	-0.0409	NA	CBWD1_exon_chr9:121573
1	TCAF1	127.8623	137.1768	0.101	1.0	NC	No	No	1	TCAF1_exon_chr7:143551235	1.0	1.0	0.0	NA	3	0.9789	0.8673	-0.1117	NA	TCAF1_exon_chr7:143551235
1	TMCO4	9.1427	3.2152	-1.509	1.0	NC	No	No	1	TMCO4_exon_chr1:20009937	1.0	1.0	0.0	NA	1	NA	NA	NA	NA	TMCO4_exon_chr1:20009937
1	ZNHIT2	8.2736	14.438	0.7857	1.0	NC	No	No	1	ZNHIT2_exon_chr11:64885173	1.0	1.0	0.0	NA	1	NA	NA	NA	NA	ZNHIT2_exon_chr11:64885173
1	ASMTL	23.1198	76.149	1.6797	1.0	NC	No	No	2	ASMTL_exon_chrX:1522382	0.5	0.4983	-0.0017	NA	1	NA	NA	NA	NA	ASMTL_exon_chrX:1522382
2	ASMTL									ASMTL_exon_chrY:1472382	0.5	0.5017	0.0017	NA	1	NA	NA	NA	NA	ASMTL_exon_chrY:1472382
1	TYMS	311.1364	340.2651	0.1379	0.8488	NC	No	No	1	TYMS_exon_chr18:672859	1.0	1.0	0.0	NA	3	0.8552	0.9116	0.0563	NA	TYMS_exon_chr18:672859
1	ATP5MF-PTCD1	26.8375	41.6799	0.6301	1.0	NC	No	No	1	ATP5MF-PTCD1_exon_chr7:99017772	1.0	1.0	0.0	NA	1	NA	NA	NA	NA	ATP5MF-PTCD1_exon_chr7:99017772
1	NOLC1	395.0936	296.8732	-0.4037	0.4553	NC	No	No	2	NOLC1_exon_chr10:103921312	0.0839	0.1549	0.071	NA	4	0.8121	0.7726	-0.0395	NA	NOLC1_exon_chr10:103921312
2	NOLC1									NOLC1_exon_chr10:103921867	0.9161	0.8451	-0.071	NA	1	NA	NA	NA	NA	NOLC1_exon_chr10:103921867
1	GJA5	26.9064	25.8402	-0.0758	1.0	NC	No	No	1	GJA5_exon_chr1:147231379	1.0	1.0	0.0	NA	3	NA	NA	NA	NA	GJA5_exon_chr1:147231379
1	HELQ	23.2385	20.4484	-0.183	1.0	NC	No	No	2	HELQ_exon_chr4:84328713	0.0	0.1889	0.1889	NA	1	NA	NA	NA	NA	HELQ_exon_chr4:84328713
2	HELQ									HELQ_exon_chr4:84375098	1.0	0.8111	-0.1889	NA	3	NA	NA	NA	NA	HELQ_exon_chr4:84375098
1	NADK2	85.0522	39.7167	-1.097	1.0	NC	No	No	1	NADK2_exon_chr5:36195384	1.0	1.0	0.0	NA	3	NA	NA	NA	NA	NADK2_exon_chr5:36195384
1	RAB25	223.4021	253.1134	0.1902	1.0	NC	No	No	1	RAB25_exon_chr1:156039950	1.0	1.0	0.0	NA	1	NA	NA	NA	NA	RAB25_exon_chr1:156039950
1	OTUD6B-AS1	24.5669	47.222	0.9214	1.0	NC	No	No	2	OTUD6B-AS1_exon_chr8:92075974	0.3164	0.06	-0.2564	NA	1	NA	NA	NA	NA	OTUD6B-AS1_exon_chr8:92075974
2	OTUD6B-AS1									OTUD6B-AS1_exon_chr8:92082050	0.6836	0.94	0.2564	NA	2	NA	NA	NA	NA	OTUD6B-AS1_exon_chr8:92082050
1	FAM83F	2.4259	0.3706	-2.8742	1.0	NC	No	No	1	FAM83F_exon_chr22:40425519	1.0	1.0	0.0	NA	2	NA	NA	NA	NA	FAM83F_exon_chr22:40425519
1	LOC341056	5.9536	26.2699	2.1325	0.6675	NC	No	No	1	LOC341056_exon_chr11:122888273	1.0	1.0	0.0	NA	1	NA	NA	NA	NA	LOC341056_exon_chr11:122888273
1	LETMD1	43.0216	84.3896	0.9541	1.0	NC	No	No	2	LETMD1_exon_chr12:51453143	0.8463	1.0	0.1537	NA	1	NA	NA	NA	NA	LETMD1_exon_chr12:51453143
2	LETMD1									LETMD1_exon_chr12:51461044	0.1537	0.0	-0.1537	NA	1	NA	NA	NA	NA	LETMD1_exon_chr12:51461044
1	CIC	37.682	16.7828	-1.1725	1.0	NC	No	No	1	CIC_exon_chr19:42798975	1.0	1.0	0.0	NA	1	NA	NA	NA	NA	CIC_exon_chr19:42798975
1	GAST	1.8969	3.8583	1.011	1.0	NC	No	No	1	GAST_exon_chr17:39872029	1.0	1.0	0.0	NA	1	NA	NA	NA	NA	GAST_exon_chr17:39872029
1	E2F4	538.5353	452.977	-0.245	0.6581	NC	No	No	1	E2F4_exon_chr16:67231910	1.0	1.0	0.0	NA	1	NA	NA	NA	NA	E2F4_exon_chr16:67231910
1	MTRNR2L10	64.1246	39.3454	-0.7021	1.0	NC	No	No	1	MTRNR2L10_exon_chrX:55208875	1.0	1.0	0.0	NA	1	NA	NA	NA	NA	MTRNR2L10_exon_chrX:55208875
1	FBF1	10.5243	3.3438	-1.6496	0.983	NC	No	No	1	FBF1_exon_chr17:73906887	1.0	1.0	0.0	NA	1	NA	NA	NA	NA	FBF1_exon_chr17:73906887
1	ZNF555	7.3381	1.369	-2.4543	1.0	NC	No	No	1	ZNF555_exon_chr19:2852377	1.0	1.0	0.0	NA	2	NA	NA	NA	NA	ZNF555_exon_chr19:2852377
1	SUMF2	172.5872	157.5316	-0.1418	1.0	NC	No	No	1	SUMF2_exon_chr7:56147220	1.0	1.0	0.0	NA	1	NA	NA	NA	NA	SUMF2_exon_chr7:56147220
1	GINS2	79.0723	123.6806	0.632	1.0	NC	No	No	1	GINS2_exon_chr16:85711943	1.0	1.0	0.0	NA	3	0.7708	0.6514	-0.1194	NA	GINS2_exon_chr16:85711943
1	NDUFA2	724.0433	731.0133	0.0079	0.9529	NC	No	No	1	NDUFA2_exon_chr5:140025310	1.0	1.0	0.0	NA	3	0.5369	0.5713	0.0344	NA	NDUFA2_exon_chr5:140025310
1	C6orf120	81.7752	57.6284	-0.4861	1.0	NC	No	No	1	C6orf120_exon_chr6:170102207	1.0	1.0	0.0	NA	8	0.472	0.8258	0.3538	NA	C6orf120_exon_chr6:170102207
1	TPST2	7.0287	13.8895	1.0174	1.0	NC	No	No	1	TPST2_exon_chr22:26922233	1.0	1.0	0.0	NA	1	NA	NA	NA	NA	TPST2_exon_chr22:26922233
1	MRPS36	912.5462	944.7378	0.0523	0.9028	NC	No	No	1	MRPS36_exon_chr5:68525034	1.0	1.0	0.0	NA	7	0.1522	0.0923	-0.0599	NA	MRPS36_exon_chr5:68525034
1	ZNF302	34.2312	45.7029	0.4033	1.0	NC	No	No	1	ZNF302_exon_chr19:35174896	1.0	1.0	0.0	NA	1	NA	NA	NA	NA	ZNF302_exon_chr19:35174896
1	IGIP	11.6695	42.9537	1.8691	1.0	NC	No	No	1	IGIP_exon_chr5:139505521	1.0	1.0	0.0	NA	1	NA	NA	NA	NA	IGIP_exon_chr5:139505521
1	VWDE	64.1354	11.0401	-2.544	0.2658	NC	No	No	1	VWDE_exon_chr7:12370823	1.0	1.0	0.0	NA	1	NA	NA	NA	NA	VWDE_exon_chr7:12370823
1	CMTM3	261.181	231.2037	-0.1737	1.0	NC	No	No	1	CMTM3_exon_chr16:66646511	1.0	1.0	0.0	NA	3	0.3968	0.341	-0.0558	NA	CMTM3_exon_chr16:66646511
1	COLEC12	182.2117	129.5051	-0.4996	0.8486	NC	No	No	1	COLEC12_exon_chr18:320064	1.0	1.0	0.0	NA	6	0.1862	0.2174	0.0312	NA	COLEC12_exon_chr18:320064
1	MSL1	70.531	79.9747	0.1807	1.0	NC	No	No	2	MSL1_exon_chr17:38285497	0.4338	0.1492	-0.2846	NA	1	NA	NA	NA	NA	MSL1_exon_chr17:38285497
2	MSL1									MSL1_exon_chr17:38290531	0.5662	0.8508	0.2846	NA	1	NA	NA	NA	NA	MSL1_exon_chr17:38290531
1	C4orf33	76.748	70.8953	-0.1203	1.0	NC	No	No	1	C4orf33_exon_chr4:130032840	1.0	1.0	0.0	NA	1	NA	NA	NA	NA	C4orf33_exon_chr4:130032840
1	ZUP1	31.5934	2.5417	-3.6478	0.1711	NC	No	No	1	ZUP1_exon_chr6:116957042	1.0	1.0	0.0	NA	1	NA	NA	NA	NA	ZUP1_exon_chr6:116957042
1	DVL3	103.6848	78.8304	-0.3862	1.0	NC	No	No	1	DVL3_exon_chr3:183888106	1.0	1.0	0.0	NA	3	0.9865	0.849	-0.1374	NA	DVL3_exon_chr3:183888106
1	PDIA3P1	3.5228	0.0	-4.3611	1.0	NC	No	No	1	PDIA3P1_exon_chr1:146649429	1.0	1.0	0.0	NA	1	NA	NA	NA	NA	PDIA3P1_exon_chr1:146649429
1	DUSP12	80.8739	99.3239	0.2909	1.0	NC	No	No	1	DUSP12_exon_chr1:161726575	1.0	1.0	0.0	NA	1	NA	NA	NA	NA	DUSP12_exon_chr1:161726575
1	ZNF681	34.7268	50.6426	0.5824	1.0	NC	No	No	1	ZNF681_exon_chr19:23928125	1.0	1.0	0.0	NA	7	0.1705	0.5994	NA	NA	ZNF681_exon_chr19:23928125
1	PDLIM7	85.9977	132.9973	0.6155	1.0	NC	No	No	2	PDLIM7_exon_chr5:176910731	0.9463	0.8622	-0.0841	NA	1	NA	NA	NA	NA	PDLIM7_exon_chr5:176910731
2	PDLIM7									PDLIM7_exon_chr5:176917594	0.0537	0.1378	0.0841	NA	1	NA	NA	NA	NA	PDLIM7_exon_chr5:176917594
1	PAXIP1	58.3965	48.5459	-0.2497	1.0	NC	No	No	1	PAXIP1_exon_chr7:154735872	1.0	1.0	0.0	NA	1	NA	NA	NA	NA	PAXIP1_exon_chr7:154735872
1	ATRX	229.1249	627.6054	1.4651	0.0	UP	No	No	4	ATRX_exon_chrX:76764107	0.1922	0.0834	-0.1088	NA	1	NA	NA	NA	NA	ATRX_exon_chrX:76764107
2	ATRX									ATRX_exon_chrX:76855289	0.0921	0.0355	-0.0565	NA	3	0.2424	0.2319	-0.0105	NA	ATRX_exon_chrX:76855289
3	ATRX									ATRX_exon_chrX:76907843	0.5072	0.5866	0.0794	NA	8	0.4654	0.5453	0.0799	NA	ATRX_exon_chrX:76907843
4	ATRX									ATRX_exon_chrX:76940085	0.2086	0.2666	0.058	NA	1	NA	NA	NA	NA	ATRX_exon_chrX:76940085
1	MRPS22	331.3643	270.7051	-0.2892	0.7848	NC	No	No	1	MRPS22_exon_chr3:139075760	1.0	1.0	0.0	NA	3	0.1126	0.1111	-0.0015	NA	MRPS22_exon_chr3:139075760
1	ATXN2L	327.158	304.7571	-0.1073	0.878	NC	No	No	1	ATXN2L_exon_chr16:28847253	1.0	1.0	0.0	NA	1	NA	NA	NA	NA	ATXN2L_exon_chr16:28847253
1	MIPEP	24.5089	48.0017	0.9763	1.0	NC	No	No	1	MIPEP_exon_chr13:24304584	1.0	1.0	0.0	NA	1	NA	NA	NA	NA	MIPEP_exon_chr13:24304584
1	NF2	34.9871	29.1494	-0.2675	1.0	NC	No	No	1	NF2_exon_chr22:30090740	1.0	1.0	0.0	NA	1	NA	NA	NA	NA	NF2_exon_chr22:30090740
1	MOSPD1	149.4928	78.9197	-0.9087	1.0	NC	No	No	1	MOSPD1_exon_chrX:134023222	1.0	1.0	0.0	NA	3	0.7952	0.8682	0.073	NA	MOSPD1_exon_chrX:134023222
1	ZNF607	30.1308	7.1328	-2.0944	1.0	NC	No	No	1	ZNF607_exon_chr19:38190796	1.0	1.0	0.0	NA	1	NA	NA	NA	NA	ZNF607_exon_chr19:38190796
1	LRFN1	12.0643	79.5934	2.7037	1.0	NC	No	No	1	LRFN1_exon_chr19:39799182	1.0	1.0	0.0	NA	1	NA	NA	NA	NA	LRFN1_exon_chr19:39799182
1	WWP1	11.6522	1.4147	-3.0329	1.0	NC	No	No	1	WWP1_exon_chr8:87479022	1.0	1.0	0.0	NA	2	NA	NA	NA	NA	WWP1_exon_chr8:87479022
1	CIR1	115.5425	92.8468	-0.3133	1.0	NC	No	No	1	CIR1_exon_chr2:175213900	1.0	1.0	0.0	NA	4	0.4429	0.6293	0.1864	NA	CIR1_exon_chr2:175213900
1	SMARCAL1	91.7221	65.493	-0.4738	1.0	NC	No	No	1	SMARCAL1_exon_chr2:217347460	1.0	1.0	0.0	NA	1	NA	NA	NA	NA	SMARCAL1_exon_chr2:217347460
1	PAFAH1B3	123.2681	65.287	-0.9164	1.0	NC	No	No	1	PAFAH1B3_exon_chr19:42801517	1.0	1.0	0.0	NA	1	NA	NA	NA	NA	PAFAH1B3_exon_chr19:42801517
1	HACE1	22.6529	14.0725	-0.7084	1.0	NC	No	No	1	HACE1_exon_chr6:105177639	1.0	1.0	0.0	NA	2	NA	NA	NA	NA	HACE1_exon_chr6:105177639
1	GCNT1	15.2946	37.2765	1.2671	1.0	NC	No	No	1	GCNT1_exon_chr9:79117154	1.0	1.0	0.0	NA	3	NA	NA	NA	NA	GCNT1_exon_chr9:79117154
1	ZNF37A	69.2288	88.3209	0.3688	1.0	NC	No	No	1	ZNF37A_exon_chr10:38406317	1.0	1.0	0.0	NA	9	0.8943	0.7528	-0.1416	NA	ZNF37A_exon_chr10:38406317
1	MED11	228.8109	148.8478	-0.6212	0.667	NC	No	No	1	MED11_exon_chr17:4636233	1.0	1.0	0.0	NA	1	NA	NA	NA	NA	MED11_exon_chr17:4636233
1	LIPG	18.9953	5.559	-1.7922	0.9037	NC	No	No	1	LIPG_exon_chr18:47116870	1.0	1.0	0.0	NA	4	NA	NA	NA	NA	LIPG_exon_chr18:47116870
1	BTAF1	96.3278	120.4137	0.3133	1.0	NC	No	No	1	BTAF1_exon_chr10:93788546	1.0	1.0	0.0	NA	3	0.1099	0.3203	0.2104	NA	BTAF1_exon_chr10:93788546
1	EFNB1	1.3045	47.0729	5.0433	0.1201	NC	No	No	1	EFNB1_exon_chrX:68060084	1.0	1.0	0.0	NA	2	NA	NA	NA	NA	EFNB1_exon_chrX:68060084
1	ERBB2	33.1457	82.9078	1.3273	1.0	NC	No	No	1	ERBB2_exon_chr17:37883941	1.0	1.0	0.0	NA	2	NA	NA	NA	NA	ERBB2_exon_chr17:37883941
1	DPH5	17.6073	51.7227	1.52	0.9086	NC	No	No	1	DPH5_exon_chr1:101456187	1.0	1.0	0.0	NA	2	NA	NA	NA	NA	DPH5_exon_chr1:101456187
1	THADA	52.1956	67.3627	0.3621	1.0	NC	No	No	2	THADA_exon_chr2:43458482	0.959	0.8242	-0.1348	NA	1	NA	NA	NA	NA	THADA_exon_chr2:43458482
2	THADA									THADA_exon_chr2:43783694	0.0253	0.1002	0.0749	NA	1	NA	NA	NA	NA	THADA_exon_chr2:43783694
1	NEK8	27.3393	14.4585	-0.909	1.0	NC	No	No	1	NEK8_exon_chr17:27068976	1.0	1.0	0.0	NA	1	NA	NA	NA	NA	NEK8_exon_chr17:27068976
1	ANXA2P3	1182.6243	1061.9422	-0.1551	0.7516	NC	No	No	1	ANXA2P3_exon_chr10:66585284	1.0	1.0	0.0	NA	1	NA	NA	NA	NA	ANXA2P3_exon_chr10:66585284
1	ERO1A	254.6625	204.5063	-0.3131	0.9116	NC	No	No	1	ERO1A_exon_chr14:53110348	1.0	1.0	0.0	NA	7	0.3449	0.6478	0.3029	NA	ERO1A_exon_chr14:53110348
1	DMD	58.0044	17.5567	-1.71	1.0	NC	No	No	1	DMD_exon_chrX:31140047	1.0	1.0	0.0	NA	3	NA	NA	NA	NA	DMD_exon_chrX:31140047
1	IRAK1BP1	4.4236	10.1501	1.1671	1.0	NC	No	No	1	IRAK1BP1_exon_chr6:79607780	1.0	1.0	0.0	NA	3	NA	NA	NA	NA	IRAK1BP1_exon_chr6:79607780
1	TMEM19	5.9616	17.8762	1.5685	0.9394	NC	No	No	1	TMEM19_exon_chr12:72094611	1.0	1.0	0.0	NA	1	NA	NA	NA	NA	TMEM19_exon_chr12:72094611
1	EEF1B2	5565.4722	5553.7676	-0.0039	0.9561	NC	No	No	1	EEF1B2_exon_chr2:207027452	1.0	1.0	0.0	NA	1	NA	NA	NA	NA	EEF1B2_exon_chr2:207027452
1	TUBD1	33.6263	23.1592	-0.5355	1.0	NC	No	No	1	TUBD1_exon_chr17:57937785	1.0	1.0	0.0	NA	2	NA	NA	NA	NA	TUBD1_exon_chr17:57937785
1	EIF6	279.6704	246.6255	-0.1886	1.0	NC	No	No	1	EIF6_exon_chr20:33867009	1.0	1.0	0.0	NA	1	NA	NA	NA	NA	EIF6_exon_chr20:33867009
1	TLCD1	127.1638	131.6909	0.0464	1.0	NC	No	No	1	TLCD1_exon_chr17:27051911	1.0	1.0	0.0	NA	1	NA	NA	NA	NA	TLCD1_exon_chr17:27051911
1	CIAO3	80.5555	76.9938	-0.0448	1.0	NC	No	No	1	CIAO3_exon_chr16:780655	1.0	1.0	0.0	NA	1	NA	NA	NA	NA	CIAO3_exon_chr16:780655
1	ARF1	813.4027	1051.7578	0.369	0.353	NC	No	No	1	ARF1_exon_chr1:228285552	1.0	1.0	0.0	NA	4	0.932	0.8743	-0.0577	NA	ARF1_exon_chr1:228285552
1	FANCA	14.2195	26.0817	0.9084	1.0	NC	No	No	2	FANCA_exon_chr16:89805116	0.563	1.0	0.437	NA	1	NA	NA	NA	NA	FANCA_exon_chr16:89805116
2	FANCA									FANCA_exon_chr16:89865487	0.437	0.0	-0.437	NA	3	NA	NA	NA	NA	FANCA_exon_chr16:89865487
1	CTF1	16.9002	4.1155	-2.0249	0.9388	NC	No	No	1	CTF1_exon_chr16:30913398	1.0	1.0	0.0	NA	1	NA	NA	NA	NA	CTF1_exon_chr16:30913398
1	PIK3R2	98.2738	91.0045	-0.1	1.0	NC	No	No	1	PIK3R2_exon_chr19:18279896	1.0	1.0	0.0	NA	1	NA	NA	NA	NA	PIK3R2_exon_chr19:18279896
1	LOC100131289	0.0	5.4658	4.912	1.0	NC	No	No	1	LOC100131289_exon_chr6:27730298	1.0	1.0	0.0	NA	2	NA	NA	NA	NA	LOC100131289_exon_chr6:27730298
1	RNF220	37.0715	38.9325	0.0847	1.0	NC	No	No	1	RNF220_exon_chr1:45116375	1.0	1.0	0.0	NA	1	NA	NA	NA	NA	RNF220_exon_chr1:45116375
1	COA4	216.9423	105.994	-1.0325	0.353	NC	No	No	1	COA4_exon_chr11:73584439	1.0	1.0	0.0	NA	2	0.4353	0.3865	-0.0489	NA	COA4_exon_chr11:73584439
1	ATF4	1576.0312	2095.3734	0.4087	0.2271	NC	No	No	1	ATF4_exon_chr22:39917777	1.0	1.0	0.0	NA	1	NA	NA	NA	NA	ATF4_exon_chr22:39917777
1	LOC143666	9.5463	8.1533	-0.2471	1.0	NC	No	No	1	LOC143666_exon_chr11:575885	1.0	1.0	0.0	NA	1	NA	NA	NA	NA	LOC143666_exon_chr11:575885
1	HEYL	0.0	3.0866	4.092	1.0	NC	No	No	1	HEYL_exon_chr1:40092852	1.0	1.0	0.0	NA	1	NA	NA	NA	NA	HEYL_exon_chr1:40092852
1	FBXL15	24.2734	39.5161	0.7379	1.0	NC	No	No	1	FBXL15_exon_chr10:104182560	1.0	1.0	0.0	NA	1	NA	NA	NA	NA	FBXL15_exon_chr10:104182560
1	ZNF615	7.0455	0.3706	-4.3955	1.0	NC	No	No	1	ZNF615_exon_chr19:52498090	1.0	1.0	0.0	NA	1	NA	NA	NA	NA	ZNF615_exon_chr19:52498090
1	LOC101928978	0.0	6.1953	5.0901	1.0	NC	No	No	1	LOC101928978_exon_chr4:84891263	1.0	1.0	0.0	NA	2	NA	NA	NA	NA	LOC101928978_exon_chr4:84891263
1	TSNAX	106.5839	60.358	-0.8068	1.0	NC	No	No	1	TSNAX_exon_chr1:231700273	1.0	1.0	0.0	NA	1	NA	NA	NA	NA	TSNAX_exon_chr1:231700273
1	DANCR	160.9222	210.6962	0.3987	0.8776	NC	No	No	1	DANCR_exon_chr4:53579415	1.0	1.0	0.0	NA	4	0.8651	0.9101	0.045	NA	DANCR_exon_chr4:53579415
1	ELK4	2.7098	45.4551	3.9937	0.4441	NC	No	No	2	ELK4_exon_chr1:205585772	0.0	0.238	0.238	NA	2	NA	NA	NA	NA	ELK4_exon_chr1:205585772
2	ELK4									ELK4_exon_chr1:205589966	1.0	0.762	-0.238	NA	2	NA	NA	NA	NA	ELK4_exon_chr1:205589966
1	PLA2G4B	5.6906	2.5942	-1.1523	1.0	NC	No	No	1	PLA2G4B_exon_chr15:42139846	1.0	1.0	0.0	NA	1	NA	NA	NA	NA	PLA2G4B_exon_chr15:42139846
1	GPCPD1	23.3999	24.5212	0.0683	1.0	NC	No	No	1	GPCPD1_exon_chr20:5528496	1.0	1.0	0.0	NA	3	NA	NA	NA	NA	GPCPD1_exon_chr20:5528496
1	CEP295	48.9123	153.4488	1.6344	0.2939	NC	Yes	No	6	CEP295_exon_chr11:93400772	0.1171	0.0912	-0.0259	NA	1	NA	NA	NA	NA	CEP295_exon_chr11:93400772
2	CEP295									CEP295_exon_chr11:93401973	0.2423	0.0653	-0.177	NA	1	NA	NA	NA	NA	CEP295_exon_chr11:93401973
3	CEP295									CEP295_exon_chr11:93424848	0.0	0.2618	0.2618	Up	1	NA	NA	NA	NA	CEP295_exon_chr11:93424848
4	CEP295									CEP295_exon_chr11:93454679	0.1055	0.1988	0.0933	NA	1	NA	NA	NA	NA	CEP295_exon_chr11:93454679
5	CEP295									CEP295_exon_chr11:93462779	0.0	0.0795	0.0795	NA	1	NA	NA	NA	NA	CEP295_exon_chr11:93462779
6	CEP295									CEP295_exon_chr11:93463396	0.535	0.3033	-0.2317	NA	1	NA	NA	NA	NA	CEP295_exon_chr11:93463396
1	MGLL	82.6538	43.3447	-0.9277	1.0	NC	No	No	1	MGLL_exon_chr3:127411166	1.0	1.0	0.0	NA	3	NA	NA	NA	NA	MGLL_exon_chr3:127411166
1	TCAF2	0.0	28.1408	7.2731	0.0298	UP	No	No	2	TCAF2_exon_chr7:143340956	nan	0.8288	nan	NA	1	NA	NA	NA	NA	TCAF2_exon_chr7:143340956
2	TCAF2									TCAF2_exon_chr7:143421452	nan	0.1712	nan	NA	1	NA	NA	NA	NA	TCAF2_exon_chr7:143421452
1	FRG1JP	64.6377	50.9399	-0.3531	1.0	NC	No	No	2	FRG1JP_exon_chr9:68427894	0.3796	0.2144	-0.1652	NA	1	NA	NA	NA	NA	FRG1JP_exon_chr9:68427894
2	FRG1JP									FRG1JP_exon_chr9:68430261	0.6204	0.7856	0.1652	NA	1	NA	NA	NA	NA	FRG1JP_exon_chr9:68430261
1	AEN	545.3566	543.727	-0.0036	0.96	NC	No	No	1	AEN_exon_chr15:89173288	1.0	1.0	0.0	NA	1	NA	NA	NA	NA	AEN_exon_chr15:89173288
1	CBX5	138.455	134.9686	-0.047	1.0	NC	No	No	2	CBX5_exon_chr12:54635689	0.9186	0.5852	-0.3334	NA	2	NA	NA	NA	NA	CBX5_exon_chr12:54635689
2	CBX5									CBX5_exon_chr12:54646011	0.0814	0.4014	0.3201	NA	6	0.0927	0.1873	0.0946	NA	CBX5_exon_chr12:54646011
1	MYH10	598.5924	866.6659	0.53	0.1164	NC	No	No	3	MYH10_exon_chr17:8379266	0.6408	0.5164	-0.1243	NA	3	0.8746	0.9064	0.0318	NA	MYH10_exon_chr17:8379266
2	MYH10									MYH10_exon_chr17:8409807	0.0508	0.1094	0.0587	NA	2	0.0244	0.2705	0.2461	NA	MYH10_exon_chr17:8409807
3	MYH10									MYH10_exon_chr17:8413267	0.3084	0.3626	0.0541	NA	1	NA	NA	NA	NA	MYH10_exon_chr17:8413267
1	ZBED9	0.0	6.1732	5.088	1.0	NC	No	No	1	ZBED9_exon_chr6:28541604	1.0	1.0	0.0	NA	1	NA	NA	NA	NA	ZBED9_exon_chr6:28541604
1	CAPS	2.7098	14.8946	2.4191	0.8123	NC	No	No	1	CAPS_exon_chr19:5915231	1.0	1.0	0.0	NA	1	NA	NA	NA	NA	CAPS_exon_chr19:5915231
1	NR2F1	6.8365	0.0	-5.3159	1.0	NC	No	No	1	NR2F1_exon_chr5:92929267	1.0	1.0	0.0	NA	1	NA	NA	NA	NA	NR2F1_exon_chr5:92929267
1	STK25	120.9081	180.6546	0.5818	0.7554	NC	No	No	1	STK25_exon_chr2:242435116	1.0	1.0	0.0	NA	4	0.3319	0.2776	-0.0543	NA	STK25_exon_chr2:242435116
1	COA5	230.1174	178.1666	-0.3737	1.0	NC	No	No	1	COA5_exon_chr2:99217256	1.0	1.0	0.0	NA	3	0.3264	0.3233	-0.0032	NA	COA5_exon_chr2:99217256
1	ZNF77	3.5228	3.3438	-0.0789	1.0	NC	No	No	1	ZNF77_exon_chr19:2934813	1.0	1.0	0.0	NA	1	NA	NA	NA	NA	ZNF77_exon_chr19:2934813
1	ZNF451	66.7433	56.6951	-0.2438	1.0	NC	No	No	2	ZNF451_exon_chr6:56965400	0.1847	0.0655	-0.1192	NA	3	NA	NA	NA	NA	ZNF451_exon_chr6:56965400
2	ZNF451									ZNF451_exon_chr6:57033220	0.8153	0.8709	0.0557	NA	2	NA	NA	NA	NA	ZNF451_exon_chr6:57033220
1	MIS18A	84.8153	126.5599	0.575	1.0	NC	No	No	1	MIS18A_exon_chr21:33641428	1.0	1.0	0.0	NA	1	NA	NA	NA	NA	MIS18A_exon_chr21:33641428
1	SENP1	52.9235	35.454	-0.5801	1.0	NC	No	No	2	SENP1_exon_chr12:48439167	0.8459	1.0	0.1541	NA	1	NA	NA	NA	NA	SENP1_exon_chr12:48439167
2	SENP1									SENP1_exon_chr12:48468390	0.1541	0.0	-0.1541	NA	3	NA	NA	NA	NA	SENP1_exon_chr12:48468390
1	ASPH	151.5517	93.5221	-0.7011	1.0	NC	No	No	3	ASPH_exon_chr8:62416068	0.528	0.4584	-0.0697	NA	1	NA	NA	NA	NA	ASPH_exon_chr8:62416068
2	ASPH									ASPH_exon_chr8:62531578	0.1081	0.2366	0.1285	NA	2	NA	NA	NA	NA	ASPH_exon_chr8:62531578
3	ASPH									ASPH_exon_chr8:62538839	0.3639	0.305	-0.0589	NA	1	NA	NA	NA	NA	ASPH_exon_chr8:62538839
1	KBTBD8	0.0	17.138	6.5569	0.1782	NC	No	No	1	KBTBD8_exon_chr3:67058345	1.0	1.0	0.0	NA	1	NA	NA	NA	NA	KBTBD8_exon_chr3:67058345
1	EEF1AKMT1	15.1945	13.3057	-0.1654	1.0	NC	No	No	1	EEF1AKMT1_exon_chr13:21303355	1.0	1.0	0.0	NA	1	NA	NA	NA	NA	EEF1AKMT1_exon_chr13:21303355
1	TMEM80	18.7816	3.6652	-2.3491	0.7285	NC	No	No	1	TMEM80_exon_chr11:702944	1.0	1.0	0.0	NA	1	NA	NA	NA	NA	TMEM80_exon_chr11:702944
1	TRPM2	0.0	3.0866	4.092	1.0	NC	No	No	1	TRPM2_exon_chr21:45861574	1.0	1.0	0.0	NA	1	NA	NA	NA	NA	TRPM2_exon_chr21:45861574
1	EEF1A1	29301.0749	29981.0418	0.0329	0.9217	NC	No	No	1	EEF1A1_exon_chr6:74227657	1.0	1.0	0.0	NA	1	NA	NA	NA	NA	EEF1A1_exon_chr6:74227657
1	PID1	0.0	4.1155	4.5051	1.0	NC	No	No	1	PID1_exon_chr2:229890824	1.0	1.0	0.0	NA	1	NA	NA	NA	NA	PID1_exon_chr2:229890824
1	LOC100270746	1.3232	0.0	-2.9789	1.0	NC	No	No	1	LOC100270746_exon_chr6:26988085	1.0	1.0	0.0	NA	1	NA	NA	NA	NA	LOC100270746_exon_chr6:26988085
1	AKAP8	132.591	97.0548	-0.4376	1.0	NC	No	No	1	AKAP8_exon_chr19:15466181	1.0	1.0	0.0	NA	2	0.8294	0.8223	-0.007	NA	AKAP8_exon_chr19:15466181
1	STX3	134.8627	146.9518	0.1426	1.0	NC	No	No	1	STX3_exon_chr11:59568327	1.0	1.0	0.0	NA	1	NA	NA	NA	NA	STX3_exon_chr11:59568327
1	LINC01311	7.0779	7.9195	0.1343	1.0	NC	No	No	1	LINC01311_exon_chr22:19159218	1.0	1.0	0.0	NA	1	NA	NA	NA	NA	LINC01311_exon_chr22:19159218
1	DHCR24	39.1895	22.7215	-0.7815	1.0	NC	No	No	1	DHCR24_exon_chr1:55318059	1.0	1.0	0.0	NA	1	NA	NA	NA	NA	DHCR24_exon_chr1:55318059
1	NBAS	3.2359	3.0562	-0.0736	1.0	NC	No	No	1	NBAS_exon_chr2:15307447	1.0	1.0	0.0	NA	1	NA	NA	NA	NA	NBAS_exon_chr2:15307447
1	BANP	50.3989	50.4465	-0.001	1.0	NC	No	No	1	BANP_exon_chr16:88110195	1.0	1.0	0.0	NA	1	NA	NA	NA	NA	BANP_exon_chr16:88110195
1	OAZ1	1041.558	903.5032	-0.2056	0.5397	NC	No	No	1	OAZ1_exon_chr19:2272970	1.0	1.0	0.0	NA	3	0.1017	0.1488	0.0471	NA	OAZ1_exon_chr19:2272970
1	CORO1B	137.4614	146.9887	0.0978	1.0	NC	No	No	1	CORO1B_exon_chr11:67205972	1.0	1.0	0.0	NA	1	NA	NA	NA	NA	CORO1B_exon_chr11:67205972
1	SEC11A	1048.6839	840.0322	-0.3182	0.5953	NC	No	No	1	SEC11A_exon_chr15:85213300	1.0	1.0	0.0	NA	2	0.8101	0.7168	-0.0932	NA	SEC11A_exon_chr15:85213300
1	SLC25A1	499.2094	542.7602	0.1206	0.8665	NC	No	No	1	SLC25A1_exon_chr22:19163757	1.0	1.0	0.0	NA	1	NA	NA	NA	NA	SLC25A1_exon_chr22:19163757
1	SLC30A5	271.2585	249.6602	-0.1241	1.0	NC	No	No	2	SLC30A5_exon_chr5:68399788	0.1796	0.0522	-0.1275	NA	8	0.1416	0.2583	0.1167	NA	SLC30A5_exon_chr5:68399788
2	SLC30A5									SLC30A5_exon_chr5:68425273	0.8204	0.9478	0.1275	NA	1	NA	NA	NA	NA	SLC30A5_exon_chr5:68425273
1	BIN2	4.3643	19.2713	2.1888	0.9212	NC	No	No	1	BIN2_exon_chr12:51675312	1.0	1.0	0.0	NA	1	NA	NA	NA	NA	BIN2_exon_chr12:51675312
1	PRKD3	59.7118	121.3366	1.0384	1.0	NC	No	No	1	PRKD3_exon_chr2:37480493	1.0	1.0	0.0	NA	3	0.2878	0.2555	-0.0323	NA	PRKD3_exon_chr2:37480493
1	PRSS16	31.8283	2.3488	-3.7311	0.2384	NC	No	No	1	PRSS16_exon_chr6:27223025	1.0	1.0	0.0	NA	2	NA	NA	NA	NA	PRSS16_exon_chr6:27223025
1	NEK7	269.8128	300.7044	0.155	1.0	NC	No	No	1	NEK7_exon_chr1:198288541	1.0	1.0	0.0	NA	1	NA	NA	NA	NA	NEK7_exon_chr1:198288541
1	ITM2B	1048.5008	1089.3995	0.0581	0.9022	NC	No	No	1	ITM2B_exon_chr13:48835274	1.0	1.0	0.0	NA	8	0.2682	0.2399	-0.0283	NA	ITM2B_exon_chr13:48835274
1	SDC3	2.1679	19.8681	3.1406	0.6446	NC	No	No	1	SDC3_exon_chr1:31346224	1.0	1.0	0.0	NA	2	NA	NA	NA	NA	SDC3_exon_chr1:31346224
1	DNM2	129.1803	84.7657	-0.6136	1.0	NC	No	No	1	DNM2_exon_chr19:10941653	1.0	1.0	0.0	NA	1	NA	NA	NA	NA	DNM2_exon_chr19:10941653
1	CMBL	273.9412	263.63	-0.062	1.0	NC	No	No	1	CMBL_exon_chr5:10280744	1.0	1.0	0.0	NA	1	NA	NA	NA	NA	CMBL_exon_chr5:10280744
1	L3MBTL3	35.7058	17.6245	-1.0063	1.0	NC	No	No	1	L3MBTL3_exon_chr6:130460754	1.0	1.0	0.0	NA	1	NA	NA	NA	NA	L3MBTL3_exon_chr6:130460754
1	LRCH1	25.0379	22.9873	-0.1015	1.0	NC	No	No	2	LRCH1_exon_chr13:47315776	0.0	0.129	0.129	NA	1	NA	NA	NA	NA	LRCH1_exon_chr13:47315776
2	LRCH1									LRCH1_exon_chr13:47324674	1.0	0.871	-0.129	NA	4	NA	NA	NA	NA	LRCH1_exon_chr13:47324674
1	ATOX1	77.7552	62.2819	-0.3199	1.0	NC	No	No	1	ATOX1_exon_chr5:151122520	1.0	1.0	0.0	NA	1	NA	NA	NA	NA	ATOX1_exon_chr5:151122520
1	CBLB	56.4227	88.7273	0.6388	1.0	NC	No	No	1	CBLB_exon_chr3:105378073	1.0	1.0	0.0	NA	6	0.3246	0.5289	0.2043	NA	CBLB_exon_chr3:105378073
1	MOB3B	324.5151	301.0187	-0.1157	0.8804	NC	No	No	1	MOB3B_exon_chr9:27330614	1.0	1.0	0.0	NA	3	0.5684	0.5964	0.028	NA	MOB3B_exon_chr9:27330614
1	DPH7	42.7878	70.8296	0.7204	1.0	NC	No	No	1	DPH7_exon_chr9:140451316	1.0	1.0	0.0	NA	1	NA	NA	NA	NA	DPH7_exon_chr9:140451316
1	CDYL	88.3588	82.9497	-0.1055	1.0	NC	No	No	1	CDYL_exon_chr6:4954131	1.0	1.0	0.0	NA	2	0.8442	0.6871	-0.1572	NA	CDYL_exon_chr6:4954131
1	MIR4485	551.6867	530.1721	-0.0594	0.9116	NC	No	No	1	MIR4485_exon_chr11:10530733	1.0	1.0	0.0	NA	5	0.4455	0.4511	0.0056	NA	MIR4485_exon_chr11:10530733
1	CENPE	332.3925	505.6693	0.5989	0.3207	NC	No	No	5	CENPE_exon_chr4:104027473	0.3717	0.2819	-0.0899	NA	2	0.382	0.4142	0.0321	NA	CENPE_exon_chr4:104027473
2	CENPE									CENPE_exon_chr4:104062261	0.1256	0.1611	0.0355	NA	1	NA	NA	NA	NA	CENPE_exon_chr4:104062261
3	CENPE									CENPE_exon_chr4:104067264	0.1213	0.1609	0.0396	NA	2	0.0601	0.0425	-0.0175	NA	CENPE_exon_chr4:104067264
4	CENPE									CENPE_exon_chr4:104070565	0.1832	0.1862	0.003	NA	3	0.8805	0.7494	-0.131	NA	CENPE_exon_chr4:104070565
5	CENPE									CENPE_exon_chr4:104096060	0.1094	0.047	-0.0625	NA	2	NA	NA	NA	NA	CENPE_exon_chr4:104096060
1	GASAL1	1.8969	0.3215	-2.5146	1.0	NC	No	No	1	GASAL1_exon_chr8:103821161	1.0	1.0	0.0	NA	1	NA	NA	NA	NA	GASAL1_exon_chr8:103821161
1	DHX58	1.8969	0.0	-3.4764	1.0	NC	No	No	1	DHX58_exon_chr17:40253964	1.0	1.0	0.0	NA	1	NA	NA	NA	NA	DHX58_exon_chr17:40253964
1	TKT	4617.2039	5759.5154	0.3188	0.3306	NC	No	No	1	TKT_exon_chr3:53259947	1.0	1.0	0.0	NA	1	NA	NA	NA	NA	TKT_exon_chr3:53259947
1	EFCAB11	121.2349	46.8455	-1.3713	0.4664	NC	No	No	1	EFCAB11_exon_chr14:90263668	1.0	1.0	0.0	NA	3	0.3495	0.4637	0.1141	NA	EFCAB11_exon_chr14:90263668
1	GAPVD1	85.9124	95.7771	0.1719	1.0	NC	No	No	1	GAPVD1_exon_chr9:128124884	1.0	1.0	0.0	NA	4	0.2881	0.2966	0.0085	NA	GAPVD1_exon_chr9:128124884
1	AP1S1	237.2525	318.6229	0.4297	0.7866	NC	No	No	1	AP1S1_exon_chr7:100803799	1.0	1.0	0.0	NA	1	NA	NA	NA	NA	AP1S1_exon_chr7:100803799
1	HDHD2	20.9708	37.1795	0.7994	1.0	NC	No	No	1	HDHD2_exon_chr18:44635156	1.0	1.0	0.0	NA	4	NA	NA	NA	NA	HDHD2_exon_chr18:44635156
1	MIER1	32.3437	61.3242	0.9035	1.0	NC	No	No	1	MIER1_exon_chr1:67450254	1.0	1.0	0.0	NA	2	NA	NA	NA	NA	MIER1_exon_chr1:67450254
1	ABCC10	18.6386	22.4415	0.2537	1.0	NC	No	No	1	ABCC10_exon_chr6:43417666	1.0	1.0	0.0	NA	1	NA	NA	NA	NA	ABCC10_exon_chr6:43417666
1	KLHL24	55.4925	24.5049	-1.1946	1.0	NC	No	No	1	KLHL24_exon_chr3:183396873	1.0	1.0	0.0	NA	3	0.2966	0.7085	0.4119	NA	KLHL24_exon_chr3:183396873
1	IGF2R	117.9206	160.7488	0.4385	0.8999	NC	No	No	1	IGF2R_exon_chr6:160525705	1.0	1.0	0.0	NA	1	NA	NA	NA	NA	IGF2R_exon_chr6:160525705
1	UBQLN4	8.7781	11.3616	0.3501	1.0	NC	No	No	1	UBQLN4_exon_chr1:156006921	1.0	1.0	0.0	NA	1	NA	NA	NA	NA	UBQLN4_exon_chr1:156006921
1	RGPD8	12.4637	0.0	-6.1819	1.0	NC	No	No	1	RGPD8_exon_chr2:113127789	1.0	1.0	0.0	NA	1	NA	NA	NA	NA	RGPD8_exon_chr2:113127789
1	ZNF774	4.577	2.8294	-0.6595	1.0	NC	No	No	1	ZNF774_exon_chr15:90903274	1.0	1.0	0.0	NA	3	NA	NA	NA	NA	ZNF774_exon_chr15:90903274
1	GOLGA7	106.8066	41.6694	-1.3533	1.0	NC	No	No	1	GOLGA7_exon_chr8:41367102	1.0	1.0	0.0	NA	4	NA	NA	NA	NA	GOLGA7_exon_chr8:41367102
1	KAT7	47.3263	56.2741	0.2583	1.0	NC	No	No	1	KAT7_exon_chr17:47904762	1.0	1.0	0.0	NA	3	0.1634	0.116	-0.0475	NA	KAT7_exon_chr17:47904762
1	DEDD	24.3564	7.8299	-1.6256	0.8294	NC	No	No	1	DEDD_exon_chr1:161092313	1.0	1.0	0.0	NA	3	NA	NA	NA	NA	DEDD_exon_chr1:161092313
1	IFITM3	29.7188	26.7949	-0.1518	1.0	NC	No	No	1	IFITM3_exon_chr11:319990	1.0	1.0	0.0	NA	1	NA	NA	NA	NA	IFITM3_exon_chr11:319990
1	AKIP1	59.2199	79.2094	0.4256	1.0	NC	No	No	1	AKIP1_exon_chr11:8940883	1.0	1.0	0.0	NA	2	0.8249	0.5504	-0.2745	NA	AKIP1_exon_chr11:8940883
1	FHOD1	106.7668	86.0412	-0.3149	1.0	NC	No	No	1	FHOD1_exon_chr16:67263621	1.0	1.0	0.0	NA	1	NA	NA	NA	NA	FHOD1_exon_chr16:67263621
1	SNORD31	10.5683	0.0	-5.9401	1.0	NC	No	No	1	SNORD31_exon_chr11:62620865	1.0	1.0	0.0	NA	1	NA	NA	NA	NA	SNORD31_exon_chr11:62620865
1	CLCN6	7.7395	5.0902	-0.6311	1.0	NC	No	No	1	CLCN6_exon_chr1:11900199	1.0	1.0	0.0	NA	1	NA	NA	NA	NA	CLCN6_exon_chr1:11900199
1	BAZ2B	26.3639	73.8856	1.5013	1.0	NC	No	No	4	BAZ2B_exon_chr2:160176929	0.225	0.1917	-0.0332	NA	2	NA	NA	NA	NA	BAZ2B_exon_chr2:160176929
2	BAZ2B									BAZ2B_exon_chr2:160245996	0.3355	0.3359	0.0004	NA	1	NA	NA	NA	NA	BAZ2B_exon_chr2:160245996
3	BAZ2B									BAZ2B_exon_chr2:160255405	0.326	0.2974	-0.0287	NA	1	NA	NA	NA	NA	BAZ2B_exon_chr2:160255405
4	BAZ2B									BAZ2B_exon_chr2:160257175	0.0	0.175	0.175	NA	1	NA	NA	NA	NA	BAZ2B_exon_chr2:160257175
1	ARFGAP2	23.5293	36.8986	0.6228	1.0	NC	No	No	2	ARFGAP2_exon_chr11:47187053	1.0	0.7826	-0.2174	NA	1	NA	NA	NA	NA	ARFGAP2_exon_chr11:47187053
2	ARFGAP2									ARFGAP2_exon_chr11:47193108	0.0	0.2174	0.2174	NA	1	NA	NA	NA	NA	ARFGAP2_exon_chr11:47193108
1	COMTD1	238.7644	253.0714	0.0733	1.0	NC	No	No	1	COMTD1_exon_chr10:76993983	1.0	1.0	0.0	NA	1	NA	NA	NA	NA	COMTD1_exon_chr10:76993983
1	GNAI2	91.1069	94.1253	0.059	1.0	NC	No	No	1	GNAI2_exon_chr3:50295799	1.0	1.0	0.0	NA	2	0.6668	0.8186	0.1518	NA	GNAI2_exon_chr3:50295799
1	TGIF1	131.7508	220.0369	0.7332	0.8275	NC	No	No	1	TGIF1_exon_chr18:3457362	1.0	1.0	0.0	NA	2	0.2706	0.4718	0.2012	NA	TGIF1_exon_chr18:3457362
1	ZNF594	10.685	32.9644	1.609	1.0	NC	No	No	1	ZNF594_exon_chr17:5087571	1.0	1.0	0.0	NA	1	NA	NA	NA	NA	ZNF594_exon_chr17:5087571
1	PUS7	46.6713	27.9516	-0.7522	1.0	NC	No	No	1	PUS7_exon_chr7:105098373	1.0	1.0	0.0	NA	2	0.7502	0.9493	0.1991	NA	PUS7_exon_chr7:105098373
1	RAB40C	6.6518	9.0247	0.4613	1.0	NC	No	No	1	RAB40C_exon_chr16:677341	1.0	1.0	0.0	NA	1	NA	NA	NA	NA	RAB40C_exon_chr16:677341
1	LINC00659	0.0	2.5942	3.8245	1.0	NC	No	No	1	LINC00659_exon_chr20:61405921	1.0	1.0	0.0	NA	1	NA	NA	NA	NA	LINC00659_exon_chr20:61405921
1	ESYT1	99.6318	117.9842	0.2433	1.0	NC	No	No	1	ESYT1_exon_chr12:56537606	1.0	1.0	0.0	NA	2	0.9818	0.835	-0.1468	NA	ESYT1_exon_chr12:56537606
1	SLC5A3	49.4407	34.1899	-0.5264	1.0	NC	No	No	1	SLC5A3_exon_chr21:35467161	1.0	1.0	0.0	NA	1	NA	NA	NA	NA	SLC5A3_exon_chr21:35467161
1	DEPP1	7.9651	13.9338	0.7885	1.0	NC	No	No	1	DEPP1_exon_chr10:45473503	1.0	1.0	0.0	NA	2	NA	NA	NA	NA	DEPP1_exon_chr10:45473503
1	NDOR1	50.5913	23.6643	-1.1007	1.0	NC	No	No	1	NDOR1_exon_chr9:140110723	1.0	1.0	0.0	NA	2	NA	NA	NA	NA	NDOR1_exon_chr9:140110723
1	STRN3	171.9283	205.6303	0.252	1.0	NC	No	No	3	STRN3_exon_chr14:31364786	0.7691	0.8551	0.0861	NA	1	NA	NA	NA	NA	STRN3_exon_chr14:31364786
2	STRN3									STRN3_exon_chr14:31416469	0.0969	0.1183	0.0214	NA	3	0.2587	0.1856	-0.0731	NA	STRN3_exon_chr14:31416469
3	STRN3									STRN3_exon_chr14:31425448	0.134	0.0265	-0.1075	NA	2	NA	NA	NA	NA	STRN3_exon_chr14:31425448
1	UBE2CP5	36.1934	48.3031	0.4177	1.0	NC	No	No	1	UBE2CP5_exon_chr19:58379127	1.0	1.0	0.0	NA	4	0.1397	0.2952	0.1556	NA	UBE2CP5_exon_chr19:58379127
1	CHMP1B2P	4.2022	0.0	-4.5807	1.0	NC	No	No	1	CHMP1B2P_exon_chrX:79490089	1.0	1.0	0.0	NA	1	NA	NA	NA	NA	CHMP1B2P_exon_chrX:79490089
1	YBX3	55.2171	56.4372	0.0222	1.0	NC	No	No	1	YBX3_exon_chr12:10852253	1.0	1.0	0.0	NA	1	NA	NA	NA	NA	YBX3_exon_chr12:10852253
1	MKS1	18.9793	45.6818	1.2521	1.0	NC	No	No	1	MKS1_exon_chr17:56283531	1.0	1.0	0.0	NA	1	NA	NA	NA	NA	MKS1_exon_chr17:56283531
1	ETFA	192.2096	265.9081	0.4643	0.8365	NC	No	No	1	ETFA_exon_chr15:76508938	1.0	1.0	0.0	NA	1	NA	NA	NA	NA	ETFA_exon_chr15:76508938
1	R3HCC1	99.027	103.999	0.0591	1.0	NC	No	No	1	R3HCC1_exon_chr8:23153479	1.0	1.0	0.0	NA	1	NA	NA	NA	NA	R3HCC1_exon_chr8:23153479
1	SHROOM3	7.7186	21.9914	1.4867	0.9388	NC	No	No	1	SHROOM3_exon_chr4:77699961	1.0	1.0	0.0	NA	2	NA	NA	NA	NA	SHROOM3_exon_chr4:77699961
1	MINCR	1.9661	10.0063	2.3032	1.0	NC	No	No	1	MINCR_exon_chr8:144363167	1.0	1.0	0.0	NA	2	NA	NA	NA	NA	MINCR_exon_chr8:144363167
1	PPIH	84.3532	83.1866	-0.0166	1.0	NC	No	No	1	PPIH_exon_chr1:43142254	1.0	1.0	0.0	NA	1	NA	NA	NA	NA	PPIH_exon_chr1:43142254
1	STK31	10.2973	0.0	-5.9027	1.0	NC	No	No	1	STK31_exon_chr7:23871754	1.0	1.0	0.0	NA	1	NA	NA	NA	NA	STK31_exon_chr7:23871754
1	NUP93	384.0482	294.5268	-0.3803	0.6021	NC	No	No	1	NUP93_exon_chr16:56878410	1.0	1.0	0.0	NA	1	NA	NA	NA	NA	NUP93_exon_chr16:56878410
1	STK11	37.4544	43.4882	0.2319	1.0	NC	No	No	1	STK11_exon_chr19:1227591	1.0	1.0	0.0	NA	2	0.0433	0.0772	0.0339	NA	STK11_exon_chr19:1227591
1	TOP3B	46.9908	38.2629	-0.2915	1.0	NC	No	No	1	TOP3B_exon_chr22:22313065	1.0	1.0	0.0	NA	1	NA	NA	NA	NA	TOP3B_exon_chr22:22313065
1	PHF19	5.2928	0.0	-4.949	1.0	NC	No	No	1	PHF19_exon_chr9:123632223	1.0	1.0	0.0	NA	1	NA	NA	NA	NA	PHF19_exon_chr9:123632223
1	MRPL43	340.961	288.1802	-0.2319	0.7866	NC	No	No	2	MRPL43_exon_chr10:102741300	0.261	0.4139	0.1529	NA	1	NA	NA	NA	NA	MRPL43_exon_chr10:102741300
2	MRPL43									MRPL43_exon_chr10:102746732	0.7259	0.5602	-0.1657	NA	1	NA	NA	NA	NA	MRPL43_exon_chr10:102746732
1	MIR1304	4.4107	0.0	-4.6882	1.0	NC	No	No	1	MIR1304_exon_chr11:93466930	1.0	1.0	0.0	NA	1	NA	NA	NA	NA	MIR1304_exon_chr11:93466930
1	CREB1	84.2077	75.2035	-0.1636	1.0	NC	No	No	1	CREB1_exon_chr2:208461637	1.0	1.0	0.0	NA	7	0.4645	0.316	-0.1485	NA	CREB1_exon_chr2:208461637
1	MRPL30	230.8498	250.0858	0.1041	1.0	NC	No	Yes	1	MRPL30_exon_chr2:99812035	1.0	1.0	0.0	NA	8	0.4376	0.3703	-0.0673	Both	MRPL30_exon_chr2:99812035
1	KIAA2026	5.0723	11.5614	1.1561	1.0	NC	No	No	1	KIAA2026_exon_chr9:5923309	1.0	1.0	0.0	NA	3	NA	NA	NA	NA	KIAA2026_exon_chr9:5923309
1	GALE	56.0129	60.0847	0.0915	1.0	NC	No	No	1	GALE_exon_chr1:24122497	1.0	1.0	0.0	NA	1	NA	NA	NA	NA	GALE_exon_chr1:24122497
1	SPATA5	35.6434	18.2625	-0.9585	1.0	NC	No	No	1	SPATA5_exon_chr4:124235042	1.0	1.0	0.0	NA	4	NA	NA	NA	NA	SPATA5_exon_chr4:124235042
1	C8orf58	24.4668	38.7423	0.6385	1.0	NC	No	No	1	C8orf58_exon_chr8:22460707	1.0	1.0	0.0	NA	1	NA	NA	NA	NA	C8orf58_exon_chr8:22460707
1	NAPEPLD	0.0	5.9296	5.022	1.0	NC	No	No	1	NAPEPLD_exon_chr7:102744001	1.0	1.0	0.0	NA	1	NA	NA	NA	NA	NAPEPLD_exon_chr7:102744001
1	GNB2	545.7598	994.6536	0.8676	0.0311	UP	No	No	1	GNB2_exon_chr7:100276317	1.0	1.0	0.0	NA	1	NA	NA	NA	NA	GNB2_exon_chr7:100276317
1	RBM41	50.8191	27.4946	-0.8946	1.0	NC	No	No	1	RBM41_exon_chrX:106310923	1.0	1.0	0.0	NA	6	NA	NA	NA	NA	RBM41_exon_chrX:106310923
1	ZNF557	12.6065	0.0	-6.1784	1.0	NC	No	No	1	ZNF557_exon_chr19:7082888	1.0	1.0	0.0	NA	1	NA	NA	NA	NA	ZNF557_exon_chr19:7082888
1	TSPAN4	74.7455	27.0313	-1.4491	1.0	NC	No	No	1	TSPAN4_exon_chr11:866561	1.0	1.0	0.0	NA	1	NA	NA	NA	NA	TSPAN4_exon_chr11:866561
1	AKTIP	120.3176	96.6127	-0.3106	1.0	NC	No	No	1	AKTIP_exon_chr16:53526434	1.0	1.0	0.0	NA	5	0.6332	0.554	-0.0791	NA	AKTIP_exon_chr16:53526434
1	GANAB	728.5709	611.5363	-0.2513	0.6521	NC	No	No	2	GANAB_exon_chr11:62393396	0.9392	0.9442	0.0051	NA	1	NA	NA	NA	NA	GANAB_exon_chr11:62393396
2	GANAB									GANAB_exon_chr11:62417471	0.0608	0.0558	-0.0051	NA	1	NA	NA	NA	NA	GANAB_exon_chr11:62417471
1	CLN3	145.5944	120.0621	-0.2819	1.0	NC	No	No	1	CLN3_exon_chr16:28488956	1.0	1.0	0.0	NA	1	NA	NA	NA	NA	CLN3_exon_chr16:28488956
1	DCTN2	304.155	218.4827	-0.487	0.8152	NC	No	No	1	DCTN2_exon_chr12:57924558	1.0	1.0	0.0	NA	3	0.5518	0.4496	-0.1022	NA	DCTN2_exon_chr12:57924558
1	METTL7A	31.3084	20.7494	-0.6118	1.0	NC	No	No	1	METTL7A_exon_chr12:51323696	1.0	1.0	0.0	NA	1	NA	NA	NA	NA	METTL7A_exon_chr12:51323696
1	CNBD2	2.4388	0.0	-3.835	1.0	NC	No	No	1	CNBD2_exon_chr20:34560550	1.0	1.0	0.0	NA	1	NA	NA	NA	NA	CNBD2_exon_chr20:34560550
1	G6PD	248.0464	250.8355	0.012	1.0	NC	No	No	1	G6PD_exon_chrX:153760305	1.0	1.0	0.0	NA	1	NA	NA	NA	NA	G6PD_exon_chrX:153760305
1	PARP2	85.127	149.6518	0.818	1.0	NC	No	No	1	PARP2_exon_chr14:20825796	1.0	1.0	0.0	NA	1	NA	NA	NA	NA	PARP2_exon_chr14:20825796
1	LINC01003	8.1294	5.2086	-0.6453	1.0	NC	No	No	1	LINC01003_exon_chr7:152161208	1.0	1.0	0.0	NA	1	NA	NA	NA	NA	LINC01003_exon_chr7:152161208
1	ATF6B	29.4941	32.3147	0.1273	1.0	NC	No	No	1	ATF6B_exon_chr6:32083745	1.0	1.0	0.0	NA	1	NA	NA	NA	NA	ATF6B_exon_chr6:32083745
1	ELP4	61.2938	101.0584	0.7275	1.0	NC	No	No	1	ELP4_exon_chr11:31804940	1.0	1.0	0.0	NA	1	NA	NA	NA	NA	ELP4_exon_chr11:31804940
1	NVL	49.1314	44.9765	-0.1337	1.0	NC	No	No	3	NVL_exon_chr1:224415372	0.6204	0.4883	-0.1322	NA	1	NA	NA	NA	NA	NVL_exon_chr1:224415372
2	NVL									NVL_exon_chr1:224492868	0.0564	0.4831	0.4267	NA	1	NA	NA	NA	NA	NVL_exon_chr1:224492868
3	NVL									NVL_exon_chr1:224505632	0.3231	0.0286	-0.2945	NA	1	NA	NA	NA	NA	NVL_exon_chr1:224505632
1	DPP8	73.1951	28.0998	-1.3798	1.0	NC	No	No	1	DPP8_exon_chr15:65739344	1.0	1.0	0.0	NA	6	NA	NA	NA	NA	DPP8_exon_chr15:65739344
1	DDX54	152.7853	319.6023	1.0716	0.1785	NC	Yes	No	2	DDX54_exon_chr12:113596982	0.9768	0.7873	-0.1895	NA	1	NA	NA	NA	NA	DDX54_exon_chr12:113596982
2	DDX54									DDX54_exon_chr12:113599802	0.0232	0.2127	0.1895	Up	1	NA	NA	NA	NA	DDX54_exon_chr12:113599802
1	APTR	18.8822	24.143	0.3351	1.0	NC	No	No	1	APTR_exon_chr7:77313568	1.0	1.0	0.0	NA	1	NA	NA	NA	NA	APTR_exon_chr7:77313568
1	WIPI2	182.4458	182.3524	0.0043	1.0	NC	No	No	1	WIPI2_exon_chr7:5270465	1.0	1.0	0.0	NA	5	0.7731	0.6066	-0.1666	NA	WIPI2_exon_chr7:5270465
1	APOC1	561.7471	616.8045	0.1357	0.8277	NC	No	No	1	APOC1_exon_chr19:45422429	1.0	1.0	0.0	NA	1	NA	NA	NA	NA	APOC1_exon_chr19:45422429
1	CCDC18	27.2059	121.6881	2.1385	0.4664	NC	No	No	5	CCDC18_exon_chr1:93687165	0.4148	0.4293	0.0145	NA	1	NA	NA	NA	NA	CCDC18_exon_chr1:93687165
2	CCDC18									CCDC18_exon_chr1:93691889	0.05	0.1186	0.0687	NA	1	NA	NA	NA	NA	CCDC18_exon_chr1:93691889
3	CCDC18									CCDC18_exon_chr1:93701804	0.0	0.2753	0.2753	Up	2	NA	NA	NA	NA	CCDC18_exon_chr1:93701804
4	CCDC18									CCDC18_exon_chr1:93704866	0.0	0.095	0.095	NA	1	NA	NA	NA	NA	CCDC18_exon_chr1:93704866
5	CCDC18									CCDC18_exon_chr1:93711661	0.5352	0.0211	-0.5141	NA	2	NA	NA	NA	NA	CCDC18_exon_chr1:93711661
1	CDC40	5.5738	37.8736	2.7458	1.0	NC	No	No	2	CDC40_exon_chr6:110531909	0.0	0.2072	0.2072	NA	1	NA	NA	NA	NA	CDC40_exon_chr6:110531909
2	CDC40									CDC40_exon_chr6:110551156	1.0	0.7928	-0.2072	NA	1	NA	NA	NA	NA	CDC40_exon_chr6:110551156
1	UBR1	64.6101	54.9344	-0.2168	1.0	NC	No	No	1	UBR1_exon_chr15:43237668	1.0	1.0	0.0	NA	2	0.926	0.8765	-0.0495	NA	UBR1_exon_chr15:43237668
1	SNCG	0.0	6.3002	5.1097	1.0	NC	No	No	1	SNCG_exon_chr10:88722721	1.0	1.0	0.0	NA	1	NA	NA	NA	NA	SNCG_exon_chr10:88722721
1	TBC1D22B	15.5201	43.317	1.4637	0.9388	NC	No	No	1	TBC1D22B_exon_chr6:37298819	1.0	1.0	0.0	NA	1	NA	NA	NA	NA	TBC1D22B_exon_chr6:37298819
1	ZNF501	0.0	7.9653	5.4526	1.0	NC	No	No	1	ZNF501_exon_chr3:44775688	1.0	1.0	0.0	NA	2	NA	NA	NA	NA	ZNF501_exon_chr3:44775688
1	KCNN4	99.9203	111.2623	0.1438	1.0	NC	No	No	1	KCNN4_exon_chr19:44271241	1.0	1.0	0.0	NA	1	NA	NA	NA	NA	KCNN4_exon_chr19:44271241
1	CGB8	214.2439	219.5552	0.0346	1.0	NC	No	No	1	CGB8_exon_chr19:49551226	1.0	1.0	0.0	NA	1	NA	NA	NA	NA	CGB8_exon_chr19:49551226
1	RPAP2	36.138	37.2922	0.0407	1.0	NC	No	No	1	RPAP2_exon_chr1:92852567	1.0	1.0	0.0	NA	4	NA	NA	NA	NA	RPAP2_exon_chr1:92852567
1	STC2	483.6167	486.584	0.0095	0.9372	NC	No	No	1	STC2_exon_chr5:172745252	1.0	1.0	0.0	NA	6	0.3244	0.3533	0.0289	NA	STC2_exon_chr5:172745252
1	ZNF511	195.2253	202.7712	0.067	1.0	NC	No	No	1	ZNF511_exon_chr10:135126291	1.0	1.0	0.0	NA	1	NA	NA	NA	NA	ZNF511_exon_chr10:135126291
1	CDC27	91.9693	91.7819	-0.0049	1.0	NC	No	No	2	CDC27_exon_chr17:45198383	0.9117	0.8713	-0.0404	NA	1	NA	NA	NA	NA	CDC27_exon_chr17:45198383
2	CDC27									CDC27_exon_chr17:45219802	0.0883	0.1287	0.0404	NA	8	0.7313	0.6806	-0.0507	NA	CDC27_exon_chr17:45219802
[truncated: 11,783 more rows]
